# Supplementary material for: High-throughput automated methods for classical and operant conditioning of Drosophila larvae
Source: eLife. 2022 Oct 28;11:e70015. doi: 10.7554/eLife.70015 (PMC9678368; doi:10.7554/eLife.70015)
Supplement: Figure 2—source data 1. [file elife-70015-fig2-data1.xlsx]

## Sheet: 69F06>CsChr-data
timeBinStart	timeBinStop	larva	boolRoll	boolBend	boolCrawl
0	0.5	1	0	0	0
0	0.5	2	0	0	0
0	0.5	3	0	0	0
0	0.5	4	0	0	0
0	0.5	5	0	0	0
0	0.5	6	0	0	0
0	0.5	7	0	0	0
0	0.5	8	0	0	0
0	0.5	9	0	1	0
0	0.5	10	0	0	0
0	0.5	11	0	0	0
0	0.5	12	0	0	0
0	0.5	13	0	0	0
0	0.5	14	0	0	0
0	0.5	15	0	0	0
0	0.5	16	0	1	0
0	0.5	17	0	0	0
0	0.5	18	0	0	0
0	0.5	19	0	0	0
0	0.5	20	0	1	0
0	0.5	21	0	0	0
0	0.5	22	0	0	0
0	0.5	23	0	0	0
0	0.5	24	0	1	0
0	0.5	25	0	1	0
0	0.5	26	0	0	0
0	0.5	27	0	0	0
0	0.5	28	0	0	0
0	0.5	29	0	0	0
0	0.5	30	0	1	0
0	0.5	31	0	0	0
0	0.5	32	0	1	0
0	0.5	33	0	0	0
0	0.5	34	0	1	0
0	0.5	35	0	1	0
0	0.5	36	0	1	0
0	0.5	37	0	1	0
0	0.5	38	0	0	0
0	0.5	39	0	0	0
0	0.5	40	0	0	0
0	0.5	41	0	0	0
0	0.5	42	0	0	0
0	0.5	43	0	0	0
0	0.5	44	0	0	0
0.5	1	1	0	1	1
0.5	1	2	0	1	1
0.5	1	3	0	0	0
0.5	1	4	0	0	0
0.5	1	5	0	0	1
0.5	1	6	0	0	0
0.5	1	7	0	0	1
0.5	1	8	0	0	0
0.5	1	9	0	0	0
0.5	1	10	0	0	0
0.5	1	11	0	0	0
0.5	1	12	0	0	0
0.5	1	13	0	0	0
0.5	1	14	0	0	0
0.5	1	15	0	0	0
0.5	1	16	0	1	0
0.5	1	17	0	1	0
0.5	1	18	0	0	0
0.5	1	19	0	0	0
0.5	1	20	0	1	0
0.5	1	21	0	0	0
0.5	1	22	0	0	0
0.5	1	23	0	0	0
0.5	1	24	0	1	0
0.5	1	25	0	1	0
0.5	1	26	0	0	1
0.5	1	27	0	0	0
0.5	1	28	0	0	1
0.5	1	29	0	0	1
0.5	1	30	0	1	1
0.5	1	31	0	0	0
0.5	1	32	0	1	0
0.5	1	33	0	0	0
0.5	1	34	0	1	0
0.5	1	35	0	1	1
0.5	1	36	0	1	0
0.5	1	37	0	1	0
0.5	1	38	0	0	1
0.5	1	39	0	0	0
0.5	1	40	0	0	1
0.5	1	41	0	0	0
0.5	1	42	0	0	0
0.5	1	43	0	0	0
0.5	1	44	0	1	0
1	1.5	1	1	1	1
1	1.5	2	0	1	1
1	1.5	3	0	0	0
1	1.5	4	0	0	0
1	1.5	5	0	0	1
1	1.5	6	0	0	0
1	1.5	7	0	0	1
1	1.5	8	0	0	0
1	1.5	9	0	0	0
1	1.5	10	0	0	0
1	1.5	11	0	0	0
1	1.5	12	0	0	1
1	1.5	13	0	0	0
1	1.5	14	0	0	0
1	1.5	15	0	0	0
1	1.5	16	0	1	0
1	1.5	17	0	1	0
1	1.5	18	0	0	0
1	1.5	19	0	0	0
1	1.5	20	0	0	0
1	1.5	21	0	0	0
1	1.5	22	0	0	0
1	1.5	23	0	0	0
1	1.5	24	0	1	0
1	1.5	25	0	1	0
1	1.5	26	0	0	1
1	1.5	27	0	0	0
1	1.5	28	0	0	1
1	1.5	29	0	0	1
1	1.5	30	0	1	1
1	1.5	31	0	0	1
1	1.5	32	0	1	0
1	1.5	33	0	1	0
1	1.5	34	0	1	0
1	1.5	35	0	1	1
1	1.5	36	0	1	0
1	1.5	37	0	0	0
1	1.5	38	0	0	1
1	1.5	39	0	0	1
1	1.5	40	0	0	0
1	1.5	41	0	0	0
1	1.5	42	0	1	1
1	1.5	43	0	0	0
1	1.5	44	0	0	0
1	1.5	45	0	0	0
1	1.5	46	0	0	0
1.5	2	1	1	1	0
1.5	2	2	0	1	0
1.5	2	3	0	0	0
1.5	2	4	0	0	0
1.5	2	5	0	0	1
1.5	2	6	0	0	1
1.5	2	7	0	0	1
1.5	2	8	0	0	0
1.5	2	9	0	0	0
1.5	2	10	0	0	0
1.5	2	11	0	0	0
1.5	2	12	0	0	0
1.5	2	13	0	0	1
1.5	2	14	0	0	0
1.5	2	15	0	0	0
1.5	2	16	0	0	0
1.5	2	17	0	0	1
1.5	2	18	0	0	1
1.5	2	19	0	0	0
1.5	2	20	0	0	1
1.5	2	21	0	0	0
1.5	2	22	0	0	0
1.5	2	23	0	0	1
1.5	2	24	0	0	0
1.5	2	25	0	0	0
1.5	2	26	0	1	0
1.5	2	27	0	0	1
1.5	2	28	0	0	0
1.5	2	29	0	0	1
1.5	2	30	0	0	1
1.5	2	31	0	1	1
1.5	2	32	0	0	1
1.5	2	33	0	0	0
1.5	2	34	0	1	0
1.5	2	35	0	1	0
1.5	2	36	0	1	1
1.5	2	37	0	1	0
1.5	2	38	0	0	0
1.5	2	39	0	0	1
1.5	2	40	0	0	1
1.5	2	41	0	0	0
1.5	2	42	0	0	1
1.5	2	43	0	1	0
1.5	2	44	0	1	1
1.5	2	45	0	0	0
1.5	2	46	0	0	0
1.5	2	47	0	0	1
2	2.5	1	0	1	0
2	2.5	2	0	1	0
2	2.5	3	0	0	1
2	2.5	4	0	0	0
2	2.5	5	0	0	1
2	2.5	6	0	0	1
2	2.5	7	0	0	1
2	2.5	8	0	0	0
2	2.5	9	0	0	0
2	2.5	10	0	0	0
2	2.5	11	0	0	0
2	2.5	12	0	0	1
2	2.5	13	0	0	1
2	2.5	14	0	0	1
2	2.5	15	0	0	1
2	2.5	16	0	0	1
2	2.5	17	0	0	1
2	2.5	18	0	0	1
2	2.5	19	0	0	1
2	2.5	20	0	0	0
2	2.5	21	0	1	0
2	2.5	22	0	0	1
2	2.5	23	0	0	0
2	2.5	24	0	1	0
2	2.5	25	0	1	0
2	2.5	26	0	0	1
2	2.5	27	0	0	1
2	2.5	28	0	0	1
2	2.5	29	0	0	1
2	2.5	30	0	0	0
2	2.5	31	0	0	1
2	2.5	32	0	0	0
2	2.5	33	0	1	0
2	2.5	34	0	0	0
2	2.5	35	0	1	1
2	2.5	36	0	1	0
2	2.5	37	0	0	0
2	2.5	38	0	0	1
2	2.5	39	0	0	1
2	2.5	40	0	0	1
2	2.5	41	0	1	0
2	2.5	42	0	1	0
2	2.5	43	0	0	1
2	2.5	44	0	0	1
2	2.5	45	0	0	1
2.5	3	1	0	1	0
2.5	3	2	0	0	1
2.5	3	3	0	0	1
2.5	3	4	0	0	1
2.5	3	5	0	0	1
2.5	3	6	0	0	1
2.5	3	7	0	0	1
2.5	3	8	0	0	0
2.5	3	9	0	0	0
2.5	3	10	0	1	0
2.5	3	11	0	0	0
2.5	3	12	0	0	1
2.5	3	13	0	0	1
2.5	3	14	0	0	1
2.5	3	15	0	0	1
2.5	3	16	0	0	1
2.5	3	17	0	0	1
2.5	3	18	0	0	0
2.5	3	19	0	0	1
2.5	3	20	0	0	1
2.5	3	21	0	0	0
2.5	3	22	0	0	0
2.5	3	23	0	0	1
2.5	3	24	0	0	1
2.5	3	25	0	1	0
2.5	3	26	0	1	0
2.5	3	27	0	0	1
2.5	3	28	0	0	1
2.5	3	29	0	0	1
2.5	3	30	0	1	0
2.5	3	31	0	0	0
2.5	3	32	0	0	1
2.5	3	33	0	0	0
2.5	3	34	0	1	1
2.5	3	35	0	0	0
2.5	3	36	0	1	0
2.5	3	37	0	1	0
2.5	3	38	0	1	0
2.5	3	39	0	0	0
2.5	3	40	0	0	0
2.5	3	41	0	0	1
2.5	3	42	0	0	1
2.5	3	43	0	0	0
2.5	3	44	0	1	0
2.5	3	45	0	0	1
2.5	3	46	0	0	1
2.5	3	47	0	0	0
3	3.5	1	0	1	0
3	3.5	2	0	0	1
3	3.5	3	0	0	0
3	3.5	4	0	0	1
3	3.5	5	0	0	1
3	3.5	6	0	0	1
3	3.5	7	0	0	1
3	3.5	8	0	0	0
3	3.5	9	0	0	0
3	3.5	10	0	1	0
3	3.5	11	0	0	0
3	3.5	12	0	0	0
3	3.5	13	0	0	1
3	3.5	14	0	0	0
3	3.5	15	0	0	1
3	3.5	16	0	0	1
3	3.5	17	0	0	0
3	3.5	18	0	0	1
3	3.5	19	0	0	0
3	3.5	20	0	0	1
3	3.5	21	0	0	1
3	3.5	22	0	0	1
3	3.5	23	0	0	1
3	3.5	24	0	0	0
3	3.5	25	0	0	1
3	3.5	26	0	1	0
3	3.5	27	0	1	1
3	3.5	28	0	0	1
3	3.5	29	0	0	0
3	3.5	30	0	0	1
3	3.5	31	0	1	0
3	3.5	32	0	0	0
3	3.5	33	0	0	1
3	3.5	34	0	1	0
3	3.5	35	0	1	1
3	3.5	36	0	0	0
3	3.5	37	0	1	0
3	3.5	38	0	1	0
3	3.5	39	0	1	0
3	3.5	40	0	0	1
3	3.5	41	0	1	0
3	3.5	42	0	0	1
3	3.5	43	0	0	1
3	3.5	44	0	0	0
3	3.5	45	0	1	0
3	3.5	46	0	0	1
3	3.5	47	0	0	1
3	3.5	48	0	0	0
3.5	4	1	0	1	0
3.5	4	2	0	0	0
3.5	4	3	0	0	1
3.5	4	4	0	0	1
3.5	4	5	0	0	1
3.5	4	6	0	0	1
3.5	4	7	0	0	1
3.5	4	8	0	0	1
3.5	4	9	0	0	0
3.5	4	10	0	1	0
3.5	4	11	0	0	0
3.5	4	12	0	0	0
3.5	4	13	0	0	1
3.5	4	14	0	0	1
3.5	4	15	0	1	1
3.5	4	16	0	0	1
3.5	4	17	0	0	1
3.5	4	18	0	0	1
3.5	4	19	0	0	1
3.5	4	20	0	0	0
3.5	4	21	0	0	1
3.5	4	22	0	0	1
3.5	4	23	0	0	0
3.5	4	24	0	0	1
3.5	4	25	0	0	0
3.5	4	26	0	0	1
3.5	4	27	0	0	0
3.5	4	28	0	1	0
3.5	4	29	0	0	1
3.5	4	30	0	0	0
3.5	4	31	0	0	1
3.5	4	32	0	1	0
3.5	4	33	0	0	0
3.5	4	34	0	0	1
3.5	4	35	0	1	0
3.5	4	36	0	1	1
3.5	4	37	0	0	0
3.5	4	38	0	1	0
3.5	4	39	0	1	0
3.5	4	40	0	1	1
3.5	4	41	0	1	1
3.5	4	42	0	0	1
3.5	4	43	0	0	1
3.5	4	44	0	0	1
3.5	4	45	0	0	0
3.5	4	46	0	0	0
3.5	4	47	0	0	0
3.5	4	48	0	0	1
3.5	4	49	0	0	1
4	4.5	1	0	1	0
4	4.5	2	0	0	1
4	4.5	3	0	0	1
4	4.5	4	0	0	1
4	4.5	5	0	0	1
4	4.5	6	0	0	1
4	4.5	7	0	0	1
4	4.5	8	0	0	1
4	4.5	9	0	0	0
4	4.5	10	0	0	0
4	4.5	11	0	0	0
4	4.5	12	0	0	1
4	4.5	13	0	0	1
4	4.5	14	0	1	0
4	4.5	15	0	0	1
4	4.5	16	0	0	1
4	4.5	17	0	0	1
4	4.5	18	0	0	0
4	4.5	19	0	0	1
4	4.5	20	0	0	1
4	4.5	21	0	0	0
4	4.5	22	0	0	0
4	4.5	23	0	0	1
4	4.5	24	0	0	0
4	4.5	25	0	0	1
4	4.5	26	0	0	1
4	4.5	27	0	1	0
4	4.5	28	0	0	1
4	4.5	29	0	0	0
4	4.5	30	0	0	1
4	4.5	31	0	1	0
4	4.5	32	0	0	0
4	4.5	33	0	0	1
4	4.5	34	0	0	0
4	4.5	35	0	1	1
4	4.5	36	0	0	0
4	4.5	37	0	1	0
4	4.5	38	0	1	0
4	4.5	39	0	1	1
4	4.5	40	0	1	0
4	4.5	41	0	0	1
4	4.5	42	0	0	0
4	4.5	43	0	0	0
4	4.5	44	0	0	0
4	4.5	45	0	0	0
4	4.5	46	0	0	1
4	4.5	47	0	0	1
4.5	5	1	0	0	0
4.5	5	2	0	0	1
4.5	5	3	0	0	1
4.5	5	4	0	0	1
4.5	5	5	0	0	1
4.5	5	6	0	0	0
4.5	5	7	0	1	0
4.5	5	8	0	0	1
4.5	5	9	0	0	0
4.5	5	10	0	0	0
4.5	5	11	0	0	0
4.5	5	12	0	0	0
4.5	5	13	0	0	1
4.5	5	14	0	0	0
4.5	5	15	0	1	1
4.5	5	16	0	0	1
4.5	5	17	0	0	0
4.5	5	18	0	0	1
4.5	5	19	0	0	1
4.5	5	20	0	0	1
4.5	5	21	0	0	1
4.5	5	22	0	0	0
4.5	5	23	0	0	1
4.5	5	24	0	0	0
4.5	5	25	0	0	1
4.5	5	26	0	0	1
4.5	5	27	0	1	0
4.5	5	28	0	0	1
4.5	5	29	0	0	0
4.5	5	30	0	0	1
4.5	5	31	0	1	0
4.5	5	32	0	0	0
4.5	5	33	0	0	1
4.5	5	34	0	1	0
4.5	5	35	0	1	1
4.5	5	36	0	0	0
4.5	5	37	1	1	0
4.5	5	38	0	1	0
4.5	5	39	0	0	1
4.5	5	40	0	1	0
4.5	5	41	0	0	1
4.5	5	42	0	0	1
4.5	5	43	0	0	1
4.5	5	44	0	0	0
4.5	5	45	0	0	0
4.5	5	46	0	1	0
4.5	5	47	0	0	1
4.5	5	48	0	0	1
5	5.5	1	0	0	1
5	5.5	2	0	0	1
5	5.5	3	0	0	1
5	5.5	4	0	0	1
5	5.5	5	0	0	1
5	5.5	6	0	0	1
5	5.5	7	0	1	0
5	5.5	8	0	0	1
5	5.5	9	0	0	0
5	5.5	10	0	0	0
5	5.5	11	0	0	0
5	5.5	12	0	0	0
5	5.5	13	0	0	1
5	5.5	14	0	0	0
5	5.5	15	0	0	1
5	5.5	16	0	0	1
5	5.5	17	0	0	1
5	5.5	18	0	0	1
5	5.5	19	0	0	1
5	5.5	20	0	0	1
5	5.5	21	0	0	1
5	5.5	22	0	0	1
5	5.5	23	0	0	0
5	5.5	24	0	0	1
5	5.5	25	0	0	1
5	5.5	26	0	0	1
5	5.5	27	0	0	0
5	5.5	28	0	1	0
5	5.5	29	0	0	1
5	5.5	30	0	0	0
5	5.5	31	0	0	1
5	5.5	32	0	1	0
5	5.5	33	0	0	0
5	5.5	34	0	0	1
5	5.5	35	0	1	0
5	5.5	36	0	0	1
5	5.5	37	0	0	0
5	5.5	38	0	1	0
5	5.5	39	0	0	0
5	5.5	40	0	0	1
5	5.5	41	0	1	0
5	5.5	42	0	0	1
5	5.5	43	0	0	0
5	5.5	44	0	0	1
5	5.5	45	0	0	0
5	5.5	46	0	1	0
5	5.5	47	0	0	1
5	5.5	48	0	0	1
5.5	6	1	0	0	1
5.5	6	2	0	0	1
5.5	6	3	0	0	1
5.5	6	4	0	0	1
5.5	6	5	0	0	1
5.5	6	6	0	0	1
5.5	6	7	0	0	1
5.5	6	8	0	0	1
5.5	6	9	0	0	0
5.5	6	10	0	0	0
5.5	6	11	0	0	0
5.5	6	12	0	0	0
5.5	6	13	0	0	1
5.5	6	14	0	0	1
5.5	6	15	0	0	1
5.5	6	16	0	0	1
5.5	6	17	0	0	1
5.5	6	18	0	0	1
5.5	6	19	0	0	1
5.5	6	20	0	0	1
5.5	6	21	0	0	0
5.5	6	22	0	0	0
5.5	6	23	0	0	0
5.5	6	24	0	0	1
5.5	6	25	0	0	1
5.5	6	26	0	0	0
5.5	6	27	0	1	0
5.5	6	28	0	0	1
5.5	6	29	0	0	1
5.5	6	30	0	0	1
5.5	6	31	0	1	0
5.5	6	32	0	0	0
5.5	6	33	0	0	1
5.5	6	34	0	1	0
5.5	6	35	0	1	0
5.5	6	36	0	0	0
5.5	6	37	0	1	0
5.5	6	38	0	1	0
5.5	6	39	0	0	1
5.5	6	40	0	1	0
5.5	6	41	0	0	1
5.5	6	42	0	0	0
5.5	6	43	0	0	0
5.5	6	44	0	0	0
5.5	6	45	0	0	1
5.5	6	46	0	1	1
5.5	6	47	0	0	1
5.5	6	48	0	0	1
6	6.5	1	0	0	1
6	6.5	2	0	0	1
6	6.5	3	0	0	1
6	6.5	4	0	0	1
6	6.5	5	0	0	1
6	6.5	6	0	0	1
6	6.5	7	0	0	1
6	6.5	8	0	0	1
6	6.5	9	0	0	0
6	6.5	10	0	0	0
6	6.5	11	0	0	1
6	6.5	12	0	0	1
6	6.5	13	0	0	1
6	6.5	14	0	0	1
6	6.5	15	0	0	1
6	6.5	16	0	0	1
6	6.5	17	0	0	1
6	6.5	18	0	0	1
6	6.5	19	0	0	1
6	6.5	20	0	0	1
6	6.5	21	0	0	0
6	6.5	22	0	0	1
6	6.5	23	0	0	1
6	6.5	24	0	0	1
6	6.5	25	0	0	1
6	6.5	26	0	1	0
6	6.5	27	0	0	1
6	6.5	28	0	0	1
6	6.5	29	0	0	1
6	6.5	30	0	0	0
6	6.5	31	0	0	0
6	6.5	32	0	0	1
6	6.5	33	0	1	0
6	6.5	34	0	1	0
6	6.5	35	0	0	0
6	6.5	36	0	0	0
6	6.5	37	1	1	0
6	6.5	38	0	0	0
6	6.5	39	0	1	0
6	6.5	40	0	0	1
6	6.5	41	0	0	1
6	6.5	42	0	0	0
6	6.5	43	0	0	0
6	6.5	44	0	0	0
6	6.5	45	0	0	1
6	6.5	46	0	0	1
6.5	7	1	0	0	1
6.5	7	2	0	0	1
6.5	7	3	0	0	0
6.5	7	4	0	0	1
6.5	7	5	0	0	0
6.5	7	6	0	0	1
6.5	7	7	0	0	1
6.5	7	8	0	0	1
6.5	7	9	0	0	0
6.5	7	10	0	1	0
6.5	7	11	0	0	0
6.5	7	12	0	0	0
6.5	7	13	0	0	1
6.5	7	14	0	0	1
6.5	7	15	0	0	1
6.5	7	16	0	0	1
6.5	7	17	0	0	1
6.5	7	18	0	0	1
6.5	7	19	0	0	1
6.5	7	20	0	0	1
6.5	7	21	0	0	0
6.5	7	22	0	0	0
6.5	7	23	0	0	1
6.5	7	24	0	0	0
6.5	7	25	0	0	1
6.5	7	26	0	0	0
6.5	7	27	0	1	0
6.5	7	28	0	0	1
6.5	7	29	0	0	1
6.5	7	30	0	0	1
6.5	7	31	0	0	0
6.5	7	32	0	0	0
6.5	7	33	0	0	1
6.5	7	34	0	1	0
6.5	7	35	0	1	0
6.5	7	36	0	0	0
6.5	7	37	0	0	0
6.5	7	38	0	1	0
6.5	7	39	0	0	1
6.5	7	40	0	1	0
6.5	7	41	0	0	1
6.5	7	42	0	0	0
6.5	7	43	0	0	0
6.5	7	44	0	0	0
6.5	7	45	0	0	0
6.5	7	46	0	0	1
6.5	7	47	0	0	1
6.5	7	48	0	0	0
7	7.5	1	0	0	1
7	7.5	2	0	0	0
7	7.5	3	0	0	0
7	7.5	4	0	0	1
7	7.5	5	0	0	1
7	7.5	6	0	0	1
7	7.5	7	0	0	1
7	7.5	8	0	0	1
7	7.5	9	0	0	0
7	7.5	10	0	1	0
7	7.5	11	0	0	0
7	7.5	12	0	1	0
7	7.5	13	0	0	1
7	7.5	14	0	0	1
7	7.5	15	0	0	1
7	7.5	16	0	0	1
7	7.5	17	0	0	0
7	7.5	18	0	0	1
7	7.5	19	0	0	1
7	7.5	20	0	0	1
7	7.5	21	0	0	0
7	7.5	22	0	0	1
7	7.5	23	0	0	1
7	7.5	24	0	0	0
7	7.5	25	0	0	1
7	7.5	26	0	0	1
7	7.5	27	0	1	0
7	7.5	28	0	0	1
7	7.5	29	0	0	0
7	7.5	30	0	0	1
7	7.5	31	0	0	0
7	7.5	32	0	0	0
7	7.5	33	0	0	1
7	7.5	34	0	1	0
7	7.5	35	0	0	0
7	7.5	36	0	0	0
7	7.5	37	0	0	0
7	7.5	38	1	1	0
7	7.5	39	0	0	1
7	7.5	40	0	0	0
7	7.5	41	0	0	1
7	7.5	42	0	0	0
7	7.5	43	0	0	1
7	7.5	44	0	0	1
7	7.5	45	0	0	1
7	7.5	46	0	0	1
7	7.5	47	0	0	1
7.5	8	1	0	0	1
7.5	8	2	0	0	1
7.5	8	3	0	1	0
7.5	8	4	0	0	1
7.5	8	5	0	0	1
7.5	8	6	0	0	1
7.5	8	7	0	0	1
7.5	8	8	0	0	0
7.5	8	9	0	0	0
7.5	8	10	0	1	1
7.5	8	11	0	0	0
7.5	8	12	0	1	0
7.5	8	13	0	0	1
7.5	8	14	0	0	1
7.5	8	15	0	0	1
7.5	8	16	0	0	1
7.5	8	17	0	0	1
7.5	8	18	0	0	1
7.5	8	19	0	0	0
7.5	8	20	0	0	1
7.5	8	21	0	1	0
7.5	8	22	0	0	1
7.5	8	23	0	0	1
7.5	8	24	0	0	0
7.5	8	25	0	0	1
7.5	8	26	0	0	1
7.5	8	27	0	0	0
7.5	8	28	0	0	1
7.5	8	29	0	0	1
7.5	8	30	0	0	1
7.5	8	31	0	0	0
7.5	8	32	0	0	0
7.5	8	33	0	0	1
7.5	8	34	0	1	1
7.5	8	35	0	0	1
7.5	8	36	0	0	0
7.5	8	37	0	0	0
7.5	8	38	0	1	0
7.5	8	39	0	0	0
7.5	8	40	0	1	0
7.5	8	41	0	0	1
7.5	8	42	0	0	0
7.5	8	43	0	1	1
7.5	8	44	0	0	1
7.5	8	45	0	0	1
7.5	8	46	0	0	1
7.5	8	47	0	0	1
8	8.5	1	0	0	1
8	8.5	2	0	0	1
8	8.5	3	0	1	0
8	8.5	4	0	0	1
8	8.5	5	0	0	1
8	8.5	6	0	0	0
8	8.5	7	0	0	1
8	8.5	8	0	1	0
8	8.5	9	0	0	0
8	8.5	10	0	1	0
8	8.5	11	0	0	0
8	8.5	12	0	1	0
8	8.5	13	0	0	1
8	8.5	14	0	0	0
8	8.5	15	0	0	1
8	8.5	16	0	0	0
8	8.5	17	0	0	1
8	8.5	18	0	0	1
8	8.5	19	0	0	1
8	8.5	20	0	0	1
8	8.5	21	0	1	0
8	8.5	22	0	0	0
8	8.5	23	0	0	1
8	8.5	24	0	0	0
8	8.5	25	0	0	1
8	8.5	26	0	0	0
8	8.5	27	0	0	0
8	8.5	28	0	0	1
8	8.5	29	0	0	1
8	8.5	30	0	0	1
8	8.5	31	0	0	0
8	8.5	32	0	0	0
8	8.5	33	0	0	1
8	8.5	34	0	1	1
8	8.5	35	0	0	1
8	8.5	36	0	0	0
8	8.5	37	0	1	0
8	8.5	38	0	0	0
8	8.5	39	0	0	0
8	8.5	40	0	0	1
8	8.5	41	0	0	0
8	8.5	42	0	0	0
8	8.5	43	0	1	0
8	8.5	44	0	0	1
8	8.5	45	0	0	1
8	8.5	46	0	0	1
8.5	9	1	0	0	1
8.5	9	2	0	0	0
8.5	9	3	0	1	0
8.5	9	4	0	0	1
8.5	9	5	0	0	1
8.5	9	6	0	0	0
8.5	9	7	0	0	1
8.5	9	8	0	1	0
8.5	9	9	0	0	0
8.5	9	10	0	0	1
8.5	9	11	0	0	0
8.5	9	12	0	0	1
8.5	9	13	0	0	1
8.5	9	14	0	0	0
8.5	9	15	0	0	1
8.5	9	16	0	0	0
8.5	9	17	0	0	0
8.5	9	18	0	0	1
8.5	9	19	0	0	0
8.5	9	20	0	0	0
8.5	9	21	0	0	1
8.5	9	22	0	1	0
8.5	9	23	0	0	1
8.5	9	24	0	0	1
8.5	9	25	0	0	0
8.5	9	26	0	0	1
8.5	9	27	0	0	0
8.5	9	28	0	0	0
8.5	9	29	0	0	1
8.5	9	30	0	0	0
8.5	9	31	0	0	1
8.5	9	32	0	0	0
8.5	9	33	0	0	0
8.5	9	34	0	0	1
8.5	9	35	0	0	0
8.5	9	36	0	0	1
8.5	9	37	0	0	1
8.5	9	38	0	1	0
8.5	9	39	0	1	0
8.5	9	40	0	0	0
8.5	9	41	0	0	1
8.5	9	42	0	1	0
8.5	9	43	0	0	1
8.5	9	44	0	1	0
8.5	9	45	0	0	1
8.5	9	46	0	0	1
8.5	9	47	0	0	1
8.5	9	48	0	0	0
9	9.5	1	0	0	1
9	9.5	2	0	0	0
9	9.5	3	0	1	0
9	9.5	4	0	0	1
9	9.5	5	0	0	1
9	9.5	6	0	0	0
9	9.5	7	0	0	1
9	9.5	8	0	1	0
9	9.5	9	0	0	0
9	9.5	10	0	0	1
9	9.5	11	0	1	0
9	9.5	12	0	0	1
9	9.5	13	0	0	1
9	9.5	14	0	0	1
9	9.5	15	0	0	1
9	9.5	16	0	0	1
9	9.5	17	0	0	1
9	9.5	18	0	0	1
9	9.5	19	0	1	0
9	9.5	20	0	0	1
9	9.5	21	0	0	1
9	9.5	22	0	1	0
9	9.5	23	0	0	1
9	9.5	24	0	0	0
9	9.5	25	0	1	0
9	9.5	26	0	0	1
9	9.5	27	0	0	0
9	9.5	28	0	0	0
9	9.5	29	0	0	1
9	9.5	30	0	0	0
9	9.5	31	0	0	1
9	9.5	32	0	0	0
9	9.5	33	0	0	0
9	9.5	34	0	0	0
9	9.5	35	0	0	0
9	9.5	36	0	0	1
9	9.5	37	0	1	0
9	9.5	38	0	0	1
9	9.5	39	0	0	0
9	9.5	40	0	1	0
9	9.5	41	0	0	0
9	9.5	42	0	0	1
9	9.5	43	0	1	0
9	9.5	44	0	0	1
9	9.5	45	0	1	0
9	9.5	46	0	0	1
9	9.5	47	0	0	1
9	9.5	48	0	0	0
9	9.5	49	0	0	1
9.5	10	1	0	0	0
9.5	10	2	0	0	0
9.5	10	3	0	1	1
9.5	10	4	0	0	1
9.5	10	5	0	0	1
9.5	10	6	0	0	1
9.5	10	7	0	0	0
9.5	10	8	0	0	0
9.5	10	9	0	0	0
9.5	10	10	0	0	1
9.5	10	11	0	1	0
9.5	10	12	0	0	1
9.5	10	13	0	0	1
9.5	10	14	0	0	1
9.5	10	15	0	0	1
9.5	10	16	0	0	1
9.5	10	17	0	0	1
9.5	10	18	0	0	1
9.5	10	19	0	1	0
9.5	10	20	0	0	1
9.5	10	21	0	1	0
9.5	10	22	0	0	1
9.5	10	23	0	0	0
9.5	10	24	0	1	0
9.5	10	25	0	0	1
9.5	10	26	0	1	0
9.5	10	27	0	0	0
9.5	10	28	0	0	1
9.5	10	29	0	0	1
9.5	10	30	0	0	1
9.5	10	31	0	0	0
9.5	10	32	0	0	0
9.5	10	33	0	0	0
9.5	10	34	0	0	0
9.5	10	35	0	0	0
9.5	10	36	0	1	0
9.5	10	37	0	0	0
9.5	10	38	0	0	1
9.5	10	39	0	1	0
9.5	10	40	0	0	0
9.5	10	41	0	0	1
9.5	10	42	0	1	0
9.5	10	43	0	0	0
9.5	10	44	0	1	0
9.5	10	45	0	0	1
9.5	10	46	0	0	1
9.5	10	47	0	0	1
9.5	10	48	0	0	0
10	10.5	1	0	0	1
10	10.5	2	0	0	0
10	10.5	3	0	1	1
10	10.5	4	0	0	1
10	10.5	5	0	0	1
10	10.5	6	0	0	1
10	10.5	7	0	1	0
10	10.5	8	0	1	0
10	10.5	9	0	0	1
10	10.5	10	0	1	0
10	10.5	11	0	0	1
10	10.5	12	0	0	1
10	10.5	13	0	0	0
10	10.5	14	0	0	0
10	10.5	15	0	0	0
10	10.5	16	0	0	0
10	10.5	17	0	0	1
10	10.5	18	0	1	0
10	10.5	19	0	0	1
10	10.5	20	0	0	1
10	10.5	21	0	1	0
10	10.5	22	0	0	1
10	10.5	23	0	1	0
10	10.5	24	0	1	1
10	10.5	25	0	0	1
10	10.5	26	0	1	0
10	10.5	27	0	0	0
10	10.5	28	0	0	1
10	10.5	29	0	0	1
10	10.5	30	0	0	1
10	10.5	31	0	0	0
10	10.5	32	0	1	0
10	10.5	33	0	0	1
10	10.5	34	0	0	0
10	10.5	35	0	0	0
10	10.5	36	0	1	0
10	10.5	37	0	0	1
10	10.5	38	0	0	1
10	10.5	39	0	1	0
10	10.5	40	0	1	1
10	10.5	41	0	0	1
10	10.5	42	0	1	0
10	10.5	43	0	0	0
10	10.5	44	0	1	0
10	10.5	45	0	0	1
10	10.5	46	0	0	1
10	10.5	47	0	0	1
10	10.5	48	0	1	0
10.5	11	1	0	0	1
10.5	11	2	0	0	0
10.5	11	3	0	0	1
10.5	11	4	0	0	1
10.5	11	5	0	0	1
10.5	11	6	0	1	0
10.5	11	7	0	1	0
10.5	11	8	0	0	0
10.5	11	9	0	1	0
10.5	11	10	0	0	1
10.5	11	11	0	0	1
10.5	11	12	0	0	0
10.5	11	13	0	0	1
10.5	11	14	0	0	1
10.5	11	15	0	0	1
10.5	11	16	0	0	1
10.5	11	17	0	0	1
10.5	11	18	0	0	1
10.5	11	19	0	1	0
10.5	11	20	0	0	1
10.5	11	21	0	1	0
10.5	11	22	0	0	1
10.5	11	23	0	0	1
10.5	11	24	0	1	0
10.5	11	25	0	0	0
10.5	11	26	0	0	0
10.5	11	27	0	0	1
10.5	11	28	0	0	0
10.5	11	29	0	1	0
10.5	11	30	0	0	1
10.5	11	31	0	0	0
10.5	11	32	0	0	0
10.5	11	33	0	0	0
10.5	11	34	0	0	1
10.5	11	35	0	0	0
10.5	11	36	0	1	1
10.5	11	37	0	0	1
10.5	11	38	0	1	0
10.5	11	39	0	0	1
10.5	11	40	0	1	0
10.5	11	41	0	0	0
10.5	11	42	0	0	0
10.5	11	43	0	0	1
10.5	11	44	0	1	0
11	11.5	1	0	0	1
11	11.5	2	0	0	1
11	11.5	3	0	0	1
11	11.5	4	0	0	1
11	11.5	5	0	0	1
11	11.5	6	0	0	1
11	11.5	7	0	1	0
11	11.5	8	0	1	0
11	11.5	9	0	0	0
11	11.5	10	0	0	1
11	11.5	11	0	1	0
11	11.5	12	0	0	0
11	11.5	13	0	0	1
11	11.5	14	0	0	0
11	11.5	15	0	0	1
11	11.5	16	0	0	1
11	11.5	17	0	0	1
11	11.5	18	0	0	1
11	11.5	19	0	0	1
11	11.5	20	0	0	1
11	11.5	21	0	1	0
11	11.5	22	0	0	1
11	11.5	23	0	0	1
11	11.5	24	0	0	1
11	11.5	25	0	0	1
11	11.5	26	0	1	0
11	11.5	27	0	0	1
11	11.5	28	0	0	1
11	11.5	29	0	0	1
11	11.5	30	0	0	0
11	11.5	31	0	0	0
11	11.5	32	0	1	0
11	11.5	33	0	0	1
11	11.5	34	0	1	0
11	11.5	35	0	0	0
11	11.5	36	0	0	1
11	11.5	37	0	0	0
11	11.5	38	0	1	0
11	11.5	39	0	0	1
11	11.5	40	0	1	0
11	11.5	41	0	0	1
11	11.5	42	0	1	0
11	11.5	43	0	0	0
11	11.5	44	0	0	0
11	11.5	45	0	0	1
11	11.5	46	0	0	0
11	11.5	47	0	0	1
11	11.5	48	0	1	1
11.5	12	1	0	0	1
11.5	12	2	0	0	1
11.5	12	3	0	0	1
11.5	12	4	0	0	1
11.5	12	5	0	0	1
11.5	12	6	0	0	1
11.5	12	7	0	0	0
11.5	12	8	0	1	0
11.5	12	9	0	0	0
11.5	12	10	0	0	1
11.5	12	11	0	1	0
11.5	12	12	0	0	0
11.5	12	13	0	0	0
11.5	12	14	0	0	1
11.5	12	15	0	0	0
11.5	12	16	0	0	1
11.5	12	17	0	0	0
11.5	12	18	0	0	1
11.5	12	19	0	0	1
11.5	12	20	0	0	1
11.5	12	21	0	0	1
11.5	12	22	0	1	1
11.5	12	23	0	0	1
11.5	12	24	0	0	1
11.5	12	25	0	0	1
11.5	12	26	0	0	1
11.5	12	27	0	1	0
11.5	12	28	0	0	0
11.5	12	29	0	0	1
11.5	12	30	0	0	1
11.5	12	31	0	0	0
11.5	12	32	0	0	0
11.5	12	33	0	0	1
11.5	12	34	0	1	0
11.5	12	35	0	1	0
11.5	12	36	0	0	1
11.5	12	37	0	0	1
11.5	12	38	0	1	0
11.5	12	39	0	0	1
11.5	12	40	0	1	0
11.5	12	41	0	0	1
11.5	12	42	0	1	0
11.5	12	43	0	0	0
11.5	12	44	0	0	0
11.5	12	45	0	0	1
11.5	12	46	0	0	0
11.5	12	47	0	0	1
11.5	12	48	0	1	1
12	12.5	1	0	0	1
12	12.5	2	0	0	0
12	12.5	3	0	0	1
12	12.5	4	0	0	1
12	12.5	5	0	0	1
12	12.5	6	0	0	0
12	12.5	7	0	0	1
12	12.5	8	0	1	0
12	12.5	9	0	0	0
12	12.5	10	0	0	1
12	12.5	11	0	0	0
12	12.5	12	0	0	0
12	12.5	13	0	0	0
12	12.5	14	0	1	0
12	12.5	15	0	0	1
12	12.5	16	0	0	1
12	12.5	17	0	0	1
12	12.5	18	0	0	1
12	12.5	19	0	0	1
12	12.5	20	0	0	1
12	12.5	21	0	0	0
12	12.5	22	0	0	1
12	12.5	23	0	0	1
12	12.5	24	0	0	1
12	12.5	25	0	1	0
12	12.5	26	0	0	1
12	12.5	27	0	0	1
12	12.5	28	0	0	0
12	12.5	29	0	1	0
12	12.5	30	0	0	0
12	12.5	31	0	1	0
12	12.5	32	0	0	1
12	12.5	33	0	1	0
12	12.5	34	0	0	1
12	12.5	35	0	0	0
12	12.5	36	0	1	0
12	12.5	37	0	0	1
12	12.5	38	0	1	0
12	12.5	39	0	0	0
12	12.5	40	0	0	0
12	12.5	41	0	0	0
12	12.5	42	0	0	1
12	12.5	43	0	0	0
12	12.5	44	0	0	0
12	12.5	45	0	0	1
12	12.5	46	0	1	1
12.5	13	1	0	0	1
12.5	13	2	0	0	0
12.5	13	3	0	0	1
12.5	13	4	0	0	1
12.5	13	5	0	0	1
12.5	13	6	0	0	1
12.5	13	7	0	0	1
12.5	13	8	0	1	0
12.5	13	9	0	0	1
12.5	13	10	0	0	0
12.5	13	11	0	0	0
12.5	13	12	0	0	1
12.5	13	13	1	1	0
12.5	13	14	0	0	1
12.5	13	15	0	0	1
12.5	13	16	0	0	1
12.5	13	17	0	0	1
12.5	13	18	0	0	1
12.5	13	19	0	0	1
12.5	13	20	0	0	1
12.5	13	21	0	0	0
12.5	13	22	0	0	1
12.5	13	23	0	0	1
12.5	13	24	0	0	1
12.5	13	25	0	1	0
12.5	13	26	0	0	1
12.5	13	27	0	0	0
12.5	13	28	0	1	0
12.5	13	29	0	0	0
12.5	13	30	0	0	1
12.5	13	31	0	1	0
12.5	13	32	0	1	0
12.5	13	33	0	0	1
12.5	13	34	0	0	0
12.5	13	35	0	1	0
12.5	13	36	0	0	0
12.5	13	37	1	1	0
12.5	13	38	0	0	0
12.5	13	39	0	0	0
12.5	13	40	0	1	0
12.5	13	41	0	1	0
12.5	13	42	0	0	0
12.5	13	43	0	0	1
12.5	13	44	0	1	0
13	13.5	1	0	0	1
13	13.5	2	0	1	0
13	13.5	3	0	0	1
13	13.5	4	0	0	1
13	13.5	5	0	0	1
13	13.5	6	0	0	1
13	13.5	7	0	0	1
13	13.5	8	0	1	0
13	13.5	9	0	0	0
13	13.5	10	0	0	0
13	13.5	11	0	1	0
13	13.5	12	0	0	1
13	13.5	13	0	0	1
13	13.5	14	1	1	0
13	13.5	15	0	0	1
13	13.5	16	0	0	1
13	13.5	17	0	0	1
13	13.5	18	0	0	1
13	13.5	19	0	0	1
13	13.5	20	0	0	1
13	13.5	21	0	0	0
13	13.5	22	0	0	0
13	13.5	23	0	0	1
13	13.5	24	0	0	0
13	13.5	25	0	0	1
13	13.5	26	0	1	0
13	13.5	27	0	0	1
13	13.5	28	0	1	0
13	13.5	29	0	0	1
13	13.5	30	0	1	0
13	13.5	31	0	0	0
13	13.5	32	0	0	0
13	13.5	33	0	1	0
13	13.5	34	0	1	0
13	13.5	35	0	1	0
13	13.5	36	0	1	0
13	13.5	37	0	1	0
13	13.5	38	0	1	0
13	13.5	39	0	1	0
13	13.5	40	0	1	0
13	13.5	41	0	0	0
13	13.5	42	0	1	0
13	13.5	43	0	0	1
13	13.5	44	0	1	0
13	13.5	45	0	0	1
13	13.5	46	0	0	1
13	13.5	47	0	0	0
13.5	14	1	0	0	1
13.5	14	2	0	1	0
13.5	14	3	0	0	1
13.5	14	4	0	0	1
13.5	14	5	0	0	1
13.5	14	6	0	0	1
13.5	14	7	0	1	0
13.5	14	8	0	0	0
13.5	14	9	0	0	0
13.5	14	10	0	1	0
13.5	14	11	0	0	1
13.5	14	12	0	0	0
13.5	14	13	0	1	0
13.5	14	14	0	0	1
13.5	14	15	0	0	1
13.5	14	16	0	0	0
13.5	14	17	0	0	1
13.5	14	18	0	0	1
13.5	14	19	0	0	1
13.5	14	20	0	1	0
13.5	14	21	0	0	0
13.5	14	22	0	0	0
13.5	14	23	0	0	1
13.5	14	24	0	0	1
13.5	14	25	1	1	0
13.5	14	26	0	0	1
13.5	14	27	0	1	0
13.5	14	28	0	0	1
13.5	14	29	0	1	0
13.5	14	30	0	0	0
13.5	14	31	0	1	0
13.5	14	32	0	1	0
13.5	14	33	0	0	1
13.5	14	34	0	1	0
13.5	14	35	0	1	0
13.5	14	36	0	1	0
13.5	14	37	0	0	0
13.5	14	38	0	1	0
13.5	14	39	0	0	0
13.5	14	40	0	1	0
13.5	14	41	0	0	1
13.5	14	42	0	1	0
13.5	14	43	0	0	1
13.5	14	44	0	0	1
13.5	14	45	0	0	0
14	14.5	1	0	0	1
14	14.5	2	0	1	0
14	14.5	3	0	0	1
14	14.5	4	0	0	1
14	14.5	5	0	0	1
14	14.5	6	0	0	1
14	14.5	7	0	0	1
14	14.5	8	0	1	0
14	14.5	9	0	0	1
14	14.5	10	0	0	0
14	14.5	11	0	1	1
14	14.5	12	0	0	0
14	14.5	13	0	0	1
14	14.5	14	0	0	0
14	14.5	15	0	0	1
14	14.5	16	0	0	1
14	14.5	17	0	0	1
14	14.5	18	0	0	0
14	14.5	19	0	0	1
14	14.5	20	0	0	1
14	14.5	21	0	1	0
14	14.5	22	0	1	0
14	14.5	23	0	0	0
14	14.5	24	0	0	1
14	14.5	25	0	0	1
14	14.5	26	1	1	0
14	14.5	27	0	0	1
14	14.5	28	0	1	1
14	14.5	29	0	0	0
14	14.5	30	0	1	0
14	14.5	31	0	0	0
14	14.5	32	0	1	0
14	14.5	33	0	0	1
14	14.5	34	0	1	0
14	14.5	35	0	1	0
14	14.5	36	0	1	0
14	14.5	37	0	1	0
14	14.5	38	0	1	0
14	14.5	39	0	1	0
14	14.5	40	0	0	0
14	14.5	41	0	1	0
14	14.5	42	0	0	1
14	14.5	43	0	1	1
14	14.5	44	0	0	1
14	14.5	45	0	1	0
14	14.5	46	0	0	0
14	14.5	47	0	0	1
14	14.5	48	0	0	0
14.5	15	1	0	0	1
14.5	15	2	0	1	0
14.5	15	3	0	0	1
14.5	15	4	0	0	1
14.5	15	5	0	0	1
14.5	15	6	0	0	1
14.5	15	7	0	0	1
14.5	15	8	0	1	0
14.5	15	9	0	0	0
14.5	15	10	0	0	1
14.5	15	11	0	1	1
14.5	15	12	0	0	1
14.5	15	13	0	0	1
14.5	15	14	0	0	1
14.5	15	15	0	0	1
14.5	15	16	0	0	0
14.5	15	17	0	0	1
14.5	15	18	0	0	0
14.5	15	19	0	0	1
14.5	15	20	0	0	1
14.5	15	21	0	1	0
14.5	15	22	0	1	0
14.5	15	23	0	0	0
14.5	15	24	0	0	1
14.5	15	25	0	0	1
14.5	15	26	0	1	0
14.5	15	27	0	0	1
14.5	15	28	0	0	1
14.5	15	29	0	0	0
14.5	15	30	0	1	0
14.5	15	31	0	0	0
14.5	15	32	0	1	0
14.5	15	33	0	0	1
14.5	15	34	0	1	1
14.5	15	35	0	1	1
14.5	15	36	0	1	0
14.5	15	37	0	1	0
14.5	15	38	0	0	0
14.5	15	39	0	1	0
14.5	15	40	0	1	0
14.5	15	41	1	1	0
14.5	15	42	0	0	1
14.5	15	43	0	1	1
14.5	15	44	0	0	1
14.5	15	45	0	1	1
14.5	15	46	0	0	0
14.5	15	47	0	0	1
14.5	15	48	0	0	0
15	15.5	1	0	0	1
15	15.5	2	0	1	0
15	15.5	3	0	0	0
15	15.5	4	0	0	1
15	15.5	5	0	0	1
15	15.5	6	0	0	1
15	15.5	7	0	0	0
15	15.5	8	0	1	0
15	15.5	9	0	0	0
15	15.5	10	0	0	1
15	15.5	11	0	0	1
15	15.5	12	0	0	1
15	15.5	13	0	0	1
15	15.5	14	0	0	1
15	15.5	15	0	0	1
15	15.5	16	0	0	0
15	15.5	17	0	1	0
15	15.5	18	0	0	1
15	15.5	19	0	1	0
15	15.5	20	0	1	0
15	15.5	21	0	0	1
15	15.5	22	0	0	1
15	15.5	23	0	0	1
15	15.5	24	0	1	0
15	15.5	25	0	0	1
15	15.5	26	0	0	1
15	15.5	27	0	0	1
15	15.5	28	0	1	0
15	15.5	29	0	0	0
15	15.5	30	0	1	0
15	15.5	31	0	0	1
15	15.5	32	0	1	1
15	15.5	33	0	1	1
15	15.5	34	0	1	0
15	15.5	35	0	1	1
15	15.5	36	0	0	0
15	15.5	37	0	1	0
15	15.5	38	0	1	0
15	15.5	39	0	1	0
15	15.5	40	0	0	0
15	15.5	41	0	1	1
15	15.5	42	0	0	1
15	15.5	43	0	0	0
15	15.5	44	0	0	1
15	15.5	45	0	0	0
15.5	16	1	0	0	1
15.5	16	2	0	1	0
15.5	16	3	0	0	0
15.5	16	4	0	0	1
15.5	16	5	0	0	1
15.5	16	6	0	0	0
15.5	16	7	0	0	0
15.5	16	8	0	1	0
15.5	16	9	0	0	0
15.5	16	10	0	0	1
15.5	16	11	0	1	0
15.5	16	12	0	0	1
15.5	16	13	0	0	1
15.5	16	14	0	0	1
15.5	16	15	0	0	1
15.5	16	16	0	0	1
15.5	16	17	0	0	0
15.5	16	18	0	1	0
15.5	16	19	0	0	1
15.5	16	20	0	1	0
15.5	16	21	0	1	0
15.5	16	22	0	0	1
15.5	16	23	0	0	1
15.5	16	24	0	0	1
15.5	16	25	0	1	0
15.5	16	26	0	0	1
15.5	16	27	0	0	1
15.5	16	28	0	0	1
15.5	16	29	0	1	0
15.5	16	30	0	1	0
15.5	16	31	0	1	0
15.5	16	32	0	0	1
15.5	16	33	0	1	0
15.5	16	34	0	0	1
15.5	16	35	0	1	0
15.5	16	36	0	1	1
15.5	16	37	0	1	0
15.5	16	38	0	1	0
15.5	16	39	1	1	0
15.5	16	40	0	1	0
15.5	16	41	0	0	0
15.5	16	42	0	0	1
15.5	16	43	0	0	0
15.5	16	44	0	1	0
15.5	16	45	0	0	1
15.5	16	46	0	0	1
16	16.5	1	0	1	1
16	16.5	2	0	0	1
16	16.5	3	0	0	0
16	16.5	4	0	0	0
16	16.5	5	0	1	0
16	16.5	6	0	0	0
16	16.5	7	0	1	0
16	16.5	8	1	1	0
16	16.5	9	0	1	0
16	16.5	10	0	1	0
16	16.5	11	0	1	0
16	16.5	12	1	1	0
16	16.5	13	0	0	1
16	16.5	14	0	1	0
16	16.5	15	0	1	0
16	16.5	16	0	1	0
16	16.5	17	0	1	0
16	16.5	18	0	1	0
16	16.5	19	0	1	0
16	16.5	20	0	1	0
16	16.5	21	0	1	0
16	16.5	22	0	0	1
16	16.5	23	0	0	0
16	16.5	24	0	1	0
16	16.5	25	0	0	1
16	16.5	26	0	1	0
16	16.5	27	0	0	0
16	16.5	28	0	1	1
16	16.5	29	0	1	1
16	16.5	30	0	1	0
16	16.5	31	0	0	0
16	16.5	32	0	1	0
16	16.5	33	0	1	1
16	16.5	34	0	1	0
16	16.5	35	1	1	0
16	16.5	36	0	1	0
16	16.5	37	0	1	0
16	16.5	38	0	1	0
16	16.5	39	0	1	0
16	16.5	40	0	1	0
16	16.5	41	0	0	1
16	16.5	42	0	1	0
16	16.5	43	0	1	0
16	16.5	44	1	1	0
16	16.5	45	0	1	0
16	16.5	46	0	0	1
16.5	17	1	0	1	0
16.5	17	2	0	0	1
16.5	17	3	1	1	0
16.5	17	4	0	1	0
16.5	17	5	0	1	0
16.5	17	6	0	1	0
16.5	17	7	0	1	0
16.5	17	8	1	1	0
16.5	17	9	0	1	0
16.5	17	10	0	1	0
16.5	17	11	0	1	0
16.5	17	12	0	1	1
16.5	17	13	0	1	0
16.5	17	14	0	0	0
16.5	17	15	0	1	0
16.5	17	16	0	1	0
16.5	17	17	0	1	0
16.5	17	18	0	1	0
16.5	17	19	0	1	0
16.5	17	20	0	1	0
16.5	17	21	0	1	0
16.5	17	22	0	1	0
16.5	17	23	0	1	0
16.5	17	24	0	1	0
16.5	17	25	0	1	0
16.5	17	26	0	1	0
16.5	17	27	0	1	0
16.5	17	28	0	0	0
16.5	17	29	0	0	1
16.5	17	30	0	1	1
16.5	17	31	0	1	0
16.5	17	32	0	1	0
16.5	17	33	0	1	0
16.5	17	34	1	1	0
16.5	17	35	0	1	0
16.5	17	36	1	1	0
16.5	17	37	0	1	0
16.5	17	38	0	1	0
16.5	17	39	0	1	0
16.5	17	40	1	1	0
16.5	17	41	0	0	0
16.5	17	42	1	1	0
16.5	17	43	1	1	0
16.5	17	44	1	1	0
16.5	17	45	0	1	0
16.5	17	46	0	1	1
17	17.5	1	0	1	0
17	17.5	2	0	1	1
17	17.5	3	1	1	0
17	17.5	4	1	1	0
17	17.5	5	0	1	1
17	17.5	6	1	1	0
17	17.5	7	0	1	0
17	17.5	8	0	1	0
17	17.5	9	0	1	0
17	17.5	10	0	1	0
17	17.5	11	0	1	1
17	17.5	12	1	1	0
17	17.5	13	0	0	0
17	17.5	14	0	1	0
17	17.5	15	1	1	0
17	17.5	16	0	1	0
17	17.5	17	1	1	0
17	17.5	18	0	1	0
17	17.5	19	1	1	0
17	17.5	20	0	1	1
17	17.5	21	0	1	0
17	17.5	22	0	1	0
17	17.5	23	0	1	0
17	17.5	24	0	1	0
17	17.5	25	1	1	0
17	17.5	26	0	1	0
17	17.5	27	0	1	0
17	17.5	28	0	0	0
17	17.5	29	1	1	0
17	17.5	30	0	1	0
17	17.5	31	0	1	0
17	17.5	32	1	1	0
17	17.5	33	1	1	0
17	17.5	34	0	1	0
17	17.5	35	1	1	0
17	17.5	36	0	1	0
17	17.5	37	0	1	0
17	17.5	38	0	1	0
17	17.5	39	0	1	0
17	17.5	40	0	1	0
17	17.5	41	0	1	0
17	17.5	42	1	1	0
17	17.5	43	1	1	0
17	17.5	44	0	1	0
17	17.5	45	0	1	0
17	17.5	46	1	1	0
17.5	18	1	1	1	0
17.5	18	2	0	1	0
17.5	18	3	0	1	0
17.5	18	4	1	1	0
17.5	18	5	0	1	1
17.5	18	6	1	1	0
17.5	18	7	0	1	0
17.5	18	8	0	1	0
17.5	18	9	0	1	0
17.5	18	10	0	1	0
17.5	18	11	0	1	0
17.5	18	12	0	1	0
17.5	18	13	0	1	0
17.5	18	14	0	1	0
17.5	18	15	1	1	0
17.5	18	16	0	1	0
17.5	18	17	0	1	0
17.5	18	18	1	1	0
17.5	18	19	0	1	0
17.5	18	20	0	1	0
17.5	18	21	1	1	0
17.5	18	22	0	1	0
17.5	18	23	0	1	0
17.5	18	24	0	1	0
17.5	18	25	0	1	0
17.5	18	26	0	1	0
17.5	18	27	0	1	0
17.5	18	28	0	1	0
17.5	18	29	0	1	1
17.5	18	30	0	1	0
17.5	18	31	0	1	0
17.5	18	32	0	1	0
17.5	18	33	0	1	0
17.5	18	34	1	1	0
17.5	18	35	0	1	0
17.5	18	36	1	1	0
17.5	18	37	0	1	0
17.5	18	38	1	1	0
17.5	18	39	0	0	0
17.5	18	40	0	1	0
17.5	18	41	0	1	0
17.5	18	42	0	1	0
17.5	18	43	0	1	0
17.5	18	44	1	1	0
17.5	18	45	0	1	0
17.5	18	46	0	1	0
18	18.5	1	0	1	0
18	18.5	2	0	1	0
18	18.5	3	0	1	0
18	18.5	4	0	1	0
18	18.5	5	0	1	1
18	18.5	6	1	1	0
18	18.5	7	1	1	0
18	18.5	8	1	1	0
18	18.5	9	0	1	0
18	18.5	10	0	1	0
18	18.5	11	0	1	0
18	18.5	12	0	1	0
18	18.5	13	1	1	0
18	18.5	14	0	1	0
18	18.5	15	1	1	0
18	18.5	16	0	1	0
18	18.5	17	0	0	0
18	18.5	18	1	1	0
18	18.5	19	0	1	0
18	18.5	20	0	0	0
18	18.5	21	1	1	0
18	18.5	22	0	1	1
18	18.5	23	0	1	0
18	18.5	24	0	1	0
18	18.5	25	0	1	0
18	18.5	26	0	1	0
18	18.5	27	0	1	0
18	18.5	28	0	1	0
18	18.5	29	1	1	0
18	18.5	30	0	1	0
18	18.5	31	0	1	0
18	18.5	32	0	1	0
18	18.5	33	0	1	0
18	18.5	34	0	1	0
18	18.5	35	0	1	0
18	18.5	36	0	1	0
18	18.5	37	1	1	0
18	18.5	38	0	1	0
18	18.5	39	0	1	0
18	18.5	40	0	0	0
18	18.5	41	1	1	0
18	18.5	42	0	1	0
18	18.5	43	0	1	0
18	18.5	44	1	1	0
18	18.5	45	1	1	0
18	18.5	46	0	1	0
18	18.5	47	1	1	0
18.5	19	1	0	1	0
18.5	19	2	1	1	0
18.5	19	3	1	1	1
18.5	19	4	1	1	0
18.5	19	5	0	1	1
18.5	19	6	1	1	0
18.5	19	7	1	1	0
18.5	19	8	1	1	0
18.5	19	9	0	1	0
18.5	19	10	1	1	0
18.5	19	11	1	1	0
18.5	19	12	1	1	0
18.5	19	13	1	1	0
18.5	19	14	0	1	0
18.5	19	15	1	1	0
18.5	19	16	0	1	0
18.5	19	17	0	0	0
18.5	19	18	1	1	0
18.5	19	19	0	1	0
18.5	19	20	0	1	0
18.5	19	21	1	1	0
18.5	19	22	0	1	0
18.5	19	23	1	1	0
18.5	19	24	0	1	0
18.5	19	25	0	1	0
18.5	19	26	1	1	0
18.5	19	27	0	1	0
18.5	19	28	0	1	0
18.5	19	29	0	1	0
18.5	19	30	1	1	0
18.5	19	31	0	1	0
18.5	19	32	0	1	0
18.5	19	33	1	1	0
18.5	19	34	0	1	0
18.5	19	35	1	1	0
18.5	19	36	0	1	0
18.5	19	37	0	1	1
18.5	19	38	0	1	0
18.5	19	39	0	1	0
18.5	19	40	0	1	0
18.5	19	41	0	1	0
18.5	19	42	1	1	0
18.5	19	43	1	1	0
18.5	19	44	1	1	0
18.5	19	45	1	1	0
19	19.5	1	0	0	0
19	19.5	2	0	1	0
19	19.5	3	1	1	0
19	19.5	4	1	1	0
19	19.5	5	0	1	0
19	19.5	6	0	1	0
19	19.5	7	1	1	0
19	19.5	8	1	1	0
19	19.5	9	1	1	0
19	19.5	10	0	1	0
19	19.5	11	0	1	0
19	19.5	12	0	1	0
19	19.5	13	1	1	0
19	19.5	14	0	1	0
19	19.5	15	1	1	0
19	19.5	16	0	1	0
19	19.5	17	0	1	0
19	19.5	18	0	1	0
19	19.5	19	1	1	0
19	19.5	20	1	1	0
19	19.5	21	0	1	0
19	19.5	22	1	1	0
19	19.5	23	0	1	0
19	19.5	24	0	1	0
19	19.5	25	0	1	0
19	19.5	26	0	1	0
19	19.5	27	0	1	0
19	19.5	28	0	1	0
19	19.5	29	1	1	0
19	19.5	30	0	1	0
19	19.5	31	0	0	0
19	19.5	32	0	1	0
19	19.5	33	1	1	0
19	19.5	34	0	1	0
19	19.5	35	1	1	0
19	19.5	36	0	1	1
19	19.5	37	0	1	1
19	19.5	38	0	1	0
19	19.5	39	0	1	0
19	19.5	40	1	1	0
19	19.5	41	1	1	0
19	19.5	42	0	1	0
19	19.5	43	0	1	0
19.5	20	1	0	0	0
19.5	20	2	1	1	0
19.5	20	3	0	1	0
19.5	20	4	1	1	0
19.5	20	5	0	1	0
19.5	20	6	1	1	0
19.5	20	7	1	1	0
19.5	20	8	0	1	0
19.5	20	9	1	1	0
19.5	20	10	0	1	0
19.5	20	11	0	1	0
19.5	20	12	1	1	0
19.5	20	13	0	1	0
19.5	20	14	1	1	0
19.5	20	15	0	1	0
19.5	20	16	0	1	0
19.5	20	17	0	1	0
19.5	20	18	1	1	0
19.5	20	19	1	1	0
19.5	20	20	0	1	0
19.5	20	21	1	1	0
19.5	20	22	1	1	0
19.5	20	23	0	1	0
19.5	20	24	1	1	0
19.5	20	25	0	0	0
19.5	20	26	0	1	0
19.5	20	27	0	1	0
19.5	20	28	1	1	0
19.5	20	29	0	1	1
19.5	20	30	0	1	0
19.5	20	31	0	1	0
19.5	20	32	0	1	0
19.5	20	33	0	1	0
19.5	20	34	0	1	0
19.5	20	35	0	1	1
19.5	20	36	1	1	0
19.5	20	37	0	1	0
19.5	20	38	0	1	1
19.5	20	39	0	1	1
19.5	20	40	0	1	0
19.5	20	41	0	1	0
19.5	20	42	0	1	0
19.5	20	43	0	1	0
19.5	20	44	1	1	0
19.5	20	45	1	1	0
19.5	20	46	0	1	0
20	20.5	1	0	1	0
20	20.5	2	0	1	0
20	20.5	3	1	1	0
20	20.5	4	1	1	0
20	20.5	5	0	1	0
20	20.5	6	1	1	0
20	20.5	7	1	1	0
20	20.5	8	0	1	0
20	20.5	9	0	1	0
20	20.5	10	1	1	0
20	20.5	11	0	1	0
20	20.5	12	1	1	0
20	20.5	13	0	1	0
20	20.5	14	0	1	0
20	20.5	15	0	1	0
20	20.5	16	0	1	0
20	20.5	17	0	1	0
20	20.5	18	1	1	0
20	20.5	19	1	1	1
20	20.5	20	0	1	0
20	20.5	21	1	1	0
20	20.5	22	1	1	0
20	20.5	23	1	1	0
20	20.5	24	0	1	0
20	20.5	25	0	1	0
20	20.5	26	0	0	1
20	20.5	27	0	1	0
20	20.5	28	0	1	0
20	20.5	29	0	1	0
20	20.5	30	0	1	1
20	20.5	31	0	1	0
20	20.5	32	0	1	0
20	20.5	33	0	1	0
20	20.5	34	0	1	0
20	20.5	35	0	1	0
20	20.5	36	1	1	0
20	20.5	37	0	0	1
20	20.5	38	1	1	0
20	20.5	39	0	1	0
20	20.5	40	1	1	1
20	20.5	41	0	1	1
20	20.5	42	0	1	0
20	20.5	43	1	1	0
20	20.5	44	0	1	0
20	20.5	45	0	1	0
20	20.5	46	0	1	0
20	20.5	47	1	1	0
20	20.5	48	1	1	0
20.5	21	1	0	1	0
20.5	21	2	0	1	0
20.5	21	3	1	1	0
20.5	21	4	1	1	0
20.5	21	5	0	1	0
20.5	21	6	0	1	0
20.5	21	7	0	1	0
20.5	21	8	0	1	0
20.5	21	9	0	1	0
20.5	21	10	0	1	0
20.5	21	11	0	1	0
20.5	21	12	0	1	0
20.5	21	13	0	1	0
20.5	21	14	0	1	0
20.5	21	15	0	1	0
20.5	21	16	0	1	0
20.5	21	17	0	1	0
20.5	21	18	1	1	0
20.5	21	19	0	1	0
20.5	21	20	0	1	0
20.5	21	21	0	1	0
20.5	21	22	0	1	0
20.5	21	23	0	1	0
20.5	21	24	0	1	0
20.5	21	25	0	0	1
20.5	21	26	0	1	0
20.5	21	27	0	1	0
20.5	21	28	0	1	0
20.5	21	29	0	1	0
20.5	21	30	0	1	0
20.5	21	31	0	1	0
20.5	21	32	0	1	0
20.5	21	33	0	1	0
20.5	21	34	0	1	0
20.5	21	35	0	0	1
20.5	21	36	1	1	0
20.5	21	37	0	1	0
20.5	21	38	0	1	0
20.5	21	39	0	1	0
20.5	21	40	0	1	0
20.5	21	41	0	1	1
20.5	21	42	0	1	0
20.5	21	43	0	1	0
20.5	21	44	1	1	0
20.5	21	45	1	1	0
21	21.5	1	0	1	0
21	21.5	2	0	1	0
21	21.5	3	0	1	0
21	21.5	4	0	1	0
21	21.5	5	0	1	0
21	21.5	6	0	1	0
21	21.5	7	0	1	0
21	21.5	8	0	1	0
21	21.5	9	0	0	0
21	21.5	10	0	0	0
21	21.5	11	0	1	0
21	21.5	12	0	1	0
21	21.5	13	0	1	0
21	21.5	14	0	1	0
21	21.5	15	0	0	0
21	21.5	16	0	1	0
21	21.5	17	0	1	0
21	21.5	18	0	1	0
21	21.5	19	0	1	0
21	21.5	20	0	0	1
21	21.5	21	0	1	0
21	21.5	22	0	1	0
21	21.5	23	0	1	0
21	21.5	24	0	0	0
21	21.5	25	0	1	0
21	21.5	26	0	0	0
21	21.5	27	0	1	0
21	21.5	28	0	1	1
21	21.5	29	0	1	0
21	21.5	30	0	1	0
21	21.5	31	0	1	0
21	21.5	32	0	0	0
21	21.5	33	0	0	0
21	21.5	34	0	0	0
21	21.5	35	0	1	0
21	21.5	36	0	0	0
21	21.5	37	0	0	1
21	21.5	38	0	1	0
21	21.5	39	0	1	0
21	21.5	40	0	0	0
21	21.5	41	0	1	0
21	21.5	42	0	1	0
21	21.5	43	0	1	0
21	21.5	44	0	0	0
[truncated: 3,626 more rows]

## Sheet: 72F11>CsChr-data
timeBinStart	timeBinStop	larva	boolRoll	boolBend	boolCrawl
0	0.5	1	0	0	0
0	0.5	2	0	1	0
0	0.5	3	0	1	0
0	0.5	4	0	0	0
0	0.5	5	0	1	0
0	0.5	6	0	1	0
0	0.5	7	0	0	0
0	0.5	8	0	0	0
0	0.5	9	0	1	0
0	0.5	10	0	1	0
0	0.5	11	0	0	0
0	0.5	12	0	0	0
0	0.5	13	0	0	0
0	0.5	14	0	0	0
0	0.5	15	0	0	0
0	0.5	16	0	1	0
0	0.5	17	0	0	0
0	0.5	18	0	0	0
0	0.5	19	0	0	0
0	0.5	20	0	0	0
0	0.5	21	0	0	0
0	0.5	22	0	0	0
0	0.5	23	0	0	0
0	0.5	24	0	0	0
0	0.5	25	0	0	0
0	0.5	26	0	1	0
0	0.5	27	0	0	0
0	0.5	28	0	0	0
0	0.5	29	0	0	0
0	0.5	30	0	0	0
0	0.5	31	0	0	0
0	0.5	32	0	0	0
0	0.5	33	0	0	0
0	0.5	34	0	0	0
0	0.5	35	0	0	0
0	0.5	36	0	0	0
0	0.5	37	0	1	0
0	0.5	38	0	0	0
0	0.5	39	0	0	0
0	0.5	40	0	0	0
0.5	1	1	0	1	0
0.5	1	2	0	1	0
0.5	1	3	0	1	1
0.5	1	4	0	1	0
0.5	1	5	0	0	0
0.5	1	6	0	1	1
0.5	1	7	0	1	0
0.5	1	8	0	0	0
0.5	1	9	0	1	0
0.5	1	10	0	1	0
0.5	1	11	0	0	0
0.5	1	12	0	1	0
0.5	1	13	0	0	0
0.5	1	14	0	0	0
0.5	1	15	0	0	0
0.5	1	16	0	0	0
0.5	1	17	0	0	1
0.5	1	18	0	0	0
0.5	1	19	0	1	0
0.5	1	20	0	0	0
0.5	1	21	0	0	0
0.5	1	22	0	0	0
0.5	1	23	0	1	0
0.5	1	24	0	0	1
0.5	1	25	0	0	0
0.5	1	26	0	0	0
0.5	1	27	0	0	0
0.5	1	28	0	0	0
0.5	1	29	0	1	0
0.5	1	30	0	0	0
0.5	1	31	0	0	1
0.5	1	32	0	0	1
0.5	1	33	0	0	0
0.5	1	34	0	0	0
0.5	1	35	0	0	0
0.5	1	36	0	0	0
0.5	1	37	0	0	1
0.5	1	38	0	0	0
0.5	1	39	0	0	0
0.5	1	40	0	0	0
0.5	1	41	0	1	0
0.5	1	42	0	1	0
0.5	1	43	0	0	0
0.5	1	44	0	0	0
1	1.5	1	0	1	0
1	1.5	2	0	1	0
1	1.5	3	0	1	0
1	1.5	4	0	0	0
1	1.5	5	0	1	1
1	1.5	6	0	1	0
1	1.5	7	0	0	0
1	1.5	8	0	0	1
1	1.5	9	0	1	0
1	1.5	10	0	1	0
1	1.5	11	0	0	0
1	1.5	12	0	1	0
1	1.5	13	0	0	0
1	1.5	14	0	0	0
1	1.5	15	0	0	0
1	1.5	16	0	1	0
1	1.5	17	0	0	1
1	1.5	18	0	0	0
1	1.5	19	0	1	1
1	1.5	20	0	0	0
1	1.5	21	0	0	0
1	1.5	22	0	0	0
1	1.5	23	0	1	0
1	1.5	24	0	0	1
1	1.5	25	0	0	0
1	1.5	26	0	0	0
1	1.5	27	0	0	1
1	1.5	28	0	0	0
1	1.5	29	0	1	1
1	1.5	30	0	0	0
1	1.5	31	0	0	1
1	1.5	32	0	0	1
1	1.5	33	0	0	1
1	1.5	34	0	0	0
1	1.5	35	0	0	0
1	1.5	36	0	0	0
1	1.5	37	0	0	0
1	1.5	38	0	0	1
1	1.5	39	0	0	1
1	1.5	40	0	0	0
1	1.5	41	0	1	0
1	1.5	42	0	1	0
1	1.5	43	0	0	0
1	1.5	44	0	0	0
1.5	2	1	0	1	0
1.5	2	2	0	0	0
1.5	2	3	0	1	0
1.5	2	4	0	0	0
1.5	2	5	0	1	0
1.5	2	6	0	1	1
1.5	2	7	0	0	0
1.5	2	8	0	0	1
1.5	2	9	0	1	0
1.5	2	10	0	1	0
1.5	2	11	0	0	0
1.5	2	12	0	1	0
1.5	2	13	0	0	0
1.5	2	14	0	0	0
1.5	2	15	0	0	0
1.5	2	16	0	1	0
1.5	2	17	0	0	1
1.5	2	18	0	0	0
1.5	2	19	0	1	1
1.5	2	20	0	0	0
1.5	2	21	0	0	0
1.5	2	22	0	0	0
1.5	2	23	0	1	0
1.5	2	24	0	0	1
1.5	2	25	0	0	0
1.5	2	26	0	0	0
1.5	2	27	0	0	1
1.5	2	28	0	1	0
1.5	2	29	0	0	1
1.5	2	30	0	0	0
1.5	2	31	0	0	1
1.5	2	32	0	0	1
1.5	2	33	0	0	1
1.5	2	34	0	0	0
1.5	2	35	0	0	0
1.5	2	36	0	0	0
1.5	2	37	0	1	0
1.5	2	38	0	0	1
1.5	2	39	0	0	1
1.5	2	40	0	0	0
1.5	2	41	0	0	0
1.5	2	42	0	0	0
1.5	2	43	0	1	0
1.5	2	44	0	1	0
1.5	2	45	0	0	1
2	2.5	1	0	1	0
2	2.5	2	0	0	0
2	2.5	3	0	1	1
2	2.5	4	0	1	0
2	2.5	5	0	0	0
2	2.5	6	0	1	1
2	2.5	7	0	0	0
2	2.5	8	0	0	1
2	2.5	9	0	1	0
2	2.5	10	0	1	0
2	2.5	11	0	1	0
2	2.5	12	0	0	0
2	2.5	13	0	0	1
2	2.5	14	0	0	1
2	2.5	15	0	0	0
2	2.5	16	0	1	1
2	2.5	17	0	0	0
2	2.5	18	0	0	0
2	2.5	19	0	0	0
2	2.5	20	0	1	0
2	2.5	21	0	0	1
2	2.5	22	0	0	1
2	2.5	23	0	0	1
2	2.5	24	0	0	1
2	2.5	25	0	1	0
2	2.5	26	0	0	1
2	2.5	27	0	0	0
2	2.5	28	0	1	1
2	2.5	29	0	0	1
2	2.5	30	0	0	1
2	2.5	31	0	0	0
2	2.5	32	0	1	0
2	2.5	33	0	1	0
2	2.5	34	0	0	1
2	2.5	35	0	0	1
2	2.5	36	0	0	0
2	2.5	37	0	0	1
2	2.5	38	0	1	1
2	2.5	39	0	1	0
2	2.5	40	0	1	0
2	2.5	41	0	0	1
2.5	3	1	0	1	0
2.5	3	2	0	0	0
2.5	3	3	0	1	1
2.5	3	4	0	0	0
2.5	3	5	0	1	0
2.5	3	6	0	0	0
2.5	3	7	0	0	0
2.5	3	8	0	1	0
2.5	3	9	0	1	0
2.5	3	10	0	0	0
2.5	3	11	0	1	0
2.5	3	12	0	0	1
2.5	3	13	0	0	0
2.5	3	14	0	0	0
2.5	3	15	0	1	0
2.5	3	16	0	0	1
2.5	3	17	0	0	0
2.5	3	18	0	1	0
2.5	3	19	0	0	1
2.5	3	20	0	0	0
2.5	3	21	0	0	0
2.5	3	22	0	1	0
2.5	3	23	0	0	1
2.5	3	24	0	0	1
2.5	3	25	0	0	1
2.5	3	26	0	1	0
2.5	3	27	0	0	1
2.5	3	28	0	1	1
2.5	3	29	0	0	1
2.5	3	30	0	0	1
2.5	3	31	0	0	0
2.5	3	32	0	1	0
2.5	3	33	0	1	0
2.5	3	34	0	0	1
2.5	3	35	0	0	0
2.5	3	36	0	0	0
2.5	3	37	0	0	1
2.5	3	38	0	1	1
2.5	3	39	0	1	0
2.5	3	40	0	1	0
2.5	3	41	0	0	0
3	3.5	1	0	1	0
3	3.5	2	0	0	0
3	3.5	3	0	1	1
3	3.5	4	0	0	1
3	3.5	5	0	1	0
3	3.5	6	0	1	0
3	3.5	7	0	0	0
3	3.5	8	0	0	0
3	3.5	9	0	0	1
3	3.5	10	0	1	0
3	3.5	11	0	1	0
3	3.5	12	0	0	0
3	3.5	13	0	1	0
3	3.5	14	0	0	1
3	3.5	15	0	0	1
3	3.5	16	0	0	0
3	3.5	17	0	1	0
3	3.5	18	0	1	1
3	3.5	19	0	0	1
3	3.5	20	0	1	0
3	3.5	21	0	0	0
3	3.5	22	0	0	1
3	3.5	23	0	0	0
3	3.5	24	0	1	0
3	3.5	25	0	0	1
3	3.5	26	0	0	1
3	3.5	27	0	0	1
3	3.5	28	0	0	0
3	3.5	29	0	1	0
3	3.5	30	0	1	1
3	3.5	31	0	0	1
3	3.5	32	0	0	0
3	3.5	33	0	0	1
3	3.5	34	0	0	0
3	3.5	35	0	0	1
3	3.5	36	0	0	1
3	3.5	37	0	1	0
3	3.5	38	0	1	1
3	3.5	39	0	0	1
3	3.5	40	0	0	0
3	3.5	41	0	0	0
3	3.5	42	0	0	1
3	3.5	43	0	1	0
3	3.5	44	0	0	0
3	3.5	45	0	1	0
3	3.5	46	0	0	1
3.5	4	1	0	1	0
3.5	4	2	0	0	0
3.5	4	3	0	1	0
3.5	4	4	0	0	0
3.5	4	5	0	1	0
3.5	4	6	0	1	0
3.5	4	7	0	1	0
3.5	4	8	0	0	0
3.5	4	9	0	0	0
3.5	4	10	0	1	0
3.5	4	11	0	1	0
3.5	4	12	0	1	0
3.5	4	13	0	0	0
3.5	4	14	0	0	1
3.5	4	15	0	0	1
3.5	4	16	0	1	0
3.5	4	17	0	1	0
3.5	4	18	0	0	1
3.5	4	19	0	1	0
3.5	4	20	0	0	0
3.5	4	21	0	0	1
3.5	4	22	0	0	0
3.5	4	23	0	1	0
3.5	4	24	0	0	0
3.5	4	25	0	0	1
3.5	4	26	0	0	0
3.5	4	27	0	1	0
3.5	4	28	0	0	1
3.5	4	29	0	0	1
3.5	4	30	0	0	1
3.5	4	31	0	0	0
3.5	4	32	0	0	1
3.5	4	33	0	0	1
3.5	4	34	0	1	0
3.5	4	35	0	1	1
3.5	4	36	0	0	1
3.5	4	37	0	0	0
3.5	4	38	0	0	0
3.5	4	39	0	0	1
3.5	4	40	0	1	0
3.5	4	41	0	0	0
3.5	4	42	0	1	0
3.5	4	43	0	0	1
4	4.5	1	0	1	0
4	4.5	2	0	0	0
4	4.5	3	0	1	0
4	4.5	4	0	1	0
4	4.5	5	0	0	0
4	4.5	6	0	1	0
4	4.5	7	0	1	0
4	4.5	8	0	1	0
4	4.5	9	0	0	0
4	4.5	10	0	0	0
4	4.5	11	0	1	0
4	4.5	12	0	1	0
4	4.5	13	0	0	0
4	4.5	14	0	1	0
4	4.5	15	0	0	0
4	4.5	16	0	0	0
4	4.5	17	0	0	1
4	4.5	18	0	1	1
4	4.5	19	0	1	0
4	4.5	20	0	0	0
4	4.5	21	0	1	0
4	4.5	22	0	0	0
4	4.5	23	0	0	0
4	4.5	24	0	0	0
4	4.5	25	0	1	0
4	4.5	26	0	0	1
4	4.5	27	0	0	0
4	4.5	28	0	0	0
4	4.5	29	0	0	1
4	4.5	30	0	0	1
4	4.5	31	0	0	1
4	4.5	32	0	1	0
4	4.5	33	0	0	1
4	4.5	34	0	0	0
4	4.5	35	0	1	0
4	4.5	36	0	0	0
4	4.5	37	0	0	1
4	4.5	38	0	0	1
4	4.5	39	0	0	0
4	4.5	40	0	0	1
4	4.5	41	0	1	0
4	4.5	42	0	0	0
4	4.5	43	0	1	0
4	4.5	44	0	0	0
4.5	5	1	0	1	0
4.5	5	2	0	0	0
4.5	5	3	0	1	0
4.5	5	4	0	1	0
4.5	5	5	0	0	1
4.5	5	6	0	1	0
4.5	5	7	0	1	0
4.5	5	8	0	1	0
4.5	5	9	0	0	0
4.5	5	10	0	0	0
4.5	5	11	0	1	0
4.5	5	12	0	1	0
4.5	5	13	0	0	0
4.5	5	14	1	1	0
4.5	5	15	0	0	1
4.5	5	16	0	0	1
4.5	5	17	0	0	1
4.5	5	18	0	1	0
4.5	5	19	0	1	0
4.5	5	20	0	0	0
4.5	5	21	0	1	0
4.5	5	22	0	0	1
4.5	5	23	0	0	1
4.5	5	24	0	0	0
4.5	5	25	0	1	1
4.5	5	26	0	0	1
4.5	5	27	0	0	1
4.5	5	28	0	0	1
4.5	5	29	0	0	0
4.5	5	30	0	0	0
4.5	5	31	0	1	1
4.5	5	32	0	0	1
4.5	5	33	0	0	1
4.5	5	34	0	0	1
4.5	5	35	0	1	0
4.5	5	36	0	0	1
4.5	5	37	0	0	0
4.5	5	38	0	1	0
4.5	5	39	0	1	1
4.5	5	40	0	0	1
4.5	5	41	0	0	1
4.5	5	42	0	0	1
4.5	5	43	0	1	0
4.5	5	44	0	0	0
4.5	5	45	0	1	0
4.5	5	46	0	0	1
5	5.5	1	0	1	0
5	5.5	2	0	0	1
5	5.5	3	0	1	0
5	5.5	4	0	1	0
5	5.5	5	0	0	1
5	5.5	6	0	1	0
5	5.5	7	0	1	0
5	5.5	8	0	1	0
5	5.5	9	0	0	0
5	5.5	10	0	1	0
5	5.5	11	0	1	0
5	5.5	12	0	1	0
5	5.5	13	0	1	0
5	5.5	14	0	1	0
5	5.5	15	0	0	1
5	5.5	16	0	0	1
5	5.5	17	0	0	1
5	5.5	18	0	1	0
5	5.5	19	0	1	0
5	5.5	20	0	0	1
5	5.5	21	0	1	0
5	5.5	22	0	0	1
5	5.5	23	0	0	1
5	5.5	24	0	0	0
5	5.5	25	0	0	1
5	5.5	26	0	0	1
5	5.5	27	0	0	1
5	5.5	28	0	0	0
5	5.5	29	0	0	0
5	5.5	30	0	1	1
5	5.5	31	0	0	1
5	5.5	32	0	0	0
5	5.5	33	0	0	1
5	5.5	34	0	1	0
5	5.5	35	0	0	1
5	5.5	36	0	0	1
5	5.5	37	0	1	0
5	5.5	38	0	1	1
5	5.5	39	0	0	1
5	5.5	40	0	0	0
5	5.5	41	0	0	0
5	5.5	42	0	0	1
5	5.5	43	0	1	0
5	5.5	44	0	0	0
5	5.5	45	0	1	0
5	5.5	46	0	0	1
5.5	6	1	0	1	0
5.5	6	2	0	0	0
5.5	6	3	0	1	0
5.5	6	4	0	1	0
5.5	6	5	0	0	0
5.5	6	6	0	0	0
5.5	6	7	0	1	0
5.5	6	8	0	1	0
5.5	6	9	0	0	0
5.5	6	10	0	1	0
5.5	6	11	0	1	0
5.5	6	12	0	1	0
5.5	6	13	0	1	0
5.5	6	14	0	1	0
5.5	6	15	0	0	0
5.5	6	16	0	0	0
5.5	6	17	0	0	1
5.5	6	18	0	0	1
5.5	6	19	0	1	1
5.5	6	20	1	1	0
5.5	6	21	0	0	1
5.5	6	22	0	1	0
5.5	6	23	0	0	0
5.5	6	24	0	0	1
5.5	6	25	0	0	0
5.5	6	26	0	0	0
5.5	6	27	0	0	0
5.5	6	28	0	0	1
5.5	6	29	0	0	0
5.5	6	30	0	0	0
5.5	6	31	0	1	1
5.5	6	32	0	0	1
5.5	6	33	0	0	1
5.5	6	34	0	0	1
5.5	6	35	0	1	0
5.5	6	36	0	0	1
5.5	6	37	0	0	0
5.5	6	38	1	1	0
5.5	6	39	0	0	0
5.5	6	40	0	0	1
5.5	6	41	0	0	0
5.5	6	42	0	0	0
5.5	6	43	0	0	1
5.5	6	44	0	1	0
5.5	6	45	0	0	0
5.5	6	46	0	1	0
5.5	6	47	0	0	0
6	6.5	1	0	1	0
6	6.5	2	0	0	0
6	6.5	3	0	1	0
6	6.5	4	0	1	0
6	6.5	5	0	0	0
6	6.5	6	0	0	0
6	6.5	7	0	1	0
6	6.5	8	0	1	0
6	6.5	9	0	1	0
6	6.5	10	0	1	0
6	6.5	11	0	1	0
6	6.5	12	0	1	0
6	6.5	13	0	1	0
6	6.5	14	0	0	1
6	6.5	15	0	0	1
6	6.5	16	0	0	1
6	6.5	17	0	0	0
6	6.5	18	0	1	0
6	6.5	19	0	0	0
6	6.5	20	0	1	0
6	6.5	21	0	0	0
6	6.5	22	0	0	1
6	6.5	23	0	0	1
6	6.5	24	0	0	0
6	6.5	25	0	0	1
6	6.5	26	0	0	1
6	6.5	27	0	0	0
6	6.5	28	0	1	0
6	6.5	29	0	1	1
6	6.5	30	0	0	1
6	6.5	31	0	0	1
6	6.5	32	0	0	1
6	6.5	33	0	1	0
6	6.5	34	0	0	1
6	6.5	35	0	0	1
6	6.5	36	0	1	0
6	6.5	37	0	0	1
6	6.5	38	0	0	1
6	6.5	39	0	0	1
6	6.5	40	0	0	0
6	6.5	41	0	0	1
6	6.5	42	0	0	0
6	6.5	43	0	0	0
6	6.5	44	0	1	1
6	6.5	45	0	0	1
6.5	7	1	0	1	0
6.5	7	2	0	0	0
6.5	7	3	0	1	0
6.5	7	4	0	1	0
6.5	7	5	0	0	1
6.5	7	6	0	0	0
6.5	7	7	0	1	0
6.5	7	8	0	1	0
6.5	7	9	0	1	0
6.5	7	10	0	0	0
6.5	7	11	0	1	0
6.5	7	12	0	1	0
6.5	7	13	0	1	0
6.5	7	14	0	0	1
6.5	7	15	0	0	1
6.5	7	16	0	0	1
6.5	7	17	0	0	1
6.5	7	18	0	0	0
6.5	7	19	0	0	1
6.5	7	20	0	0	0
6.5	7	21	0	0	0
6.5	7	22	0	0	1
6.5	7	23	0	0	0
6.5	7	24	0	0	1
6.5	7	25	0	0	0
6.5	7	26	0	0	1
6.5	7	27	0	0	1
6.5	7	28	0	0	0
6.5	7	29	0	1	0
6.5	7	30	0	1	0
6.5	7	31	0	0	1
6.5	7	32	0	0	0
6.5	7	33	0	0	1
6.5	7	34	0	1	1
6.5	7	35	0	0	1
6.5	7	36	0	0	1
6.5	7	37	0	1	0
6.5	7	38	0	0	1
6.5	7	39	0	0	1
6.5	7	40	0	0	1
6.5	7	41	0	0	0
6.5	7	42	0	0	1
6.5	7	43	0	1	0
6.5	7	44	0	0	0
6.5	7	45	0	1	1
6.5	7	46	0	0	1
7	7.5	1	0	1	0
7	7.5	2	0	0	1
7	7.5	3	0	1	0
7	7.5	4	0	0	0
7	7.5	5	0	0	1
7	7.5	6	0	0	0
7	7.5	7	0	1	0
7	7.5	8	0	1	0
7	7.5	9	0	1	0
7	7.5	10	0	0	0
7	7.5	11	0	1	0
7	7.5	12	0	0	0
7	7.5	13	0	1	0
7	7.5	14	0	0	1
7	7.5	15	0	0	0
7	7.5	16	0	0	1
7	7.5	17	0	0	1
7	7.5	18	0	0	1
7	7.5	19	0	0	1
7	7.5	20	0	0	0
7	7.5	21	0	0	0
7	7.5	22	0	0	1
7	7.5	23	0	0	0
7	7.5	24	0	0	1
7	7.5	25	0	0	0
7	7.5	26	0	0	1
7	7.5	27	0	0	0
7	7.5	28	0	1	0
7	7.5	29	0	1	0
7	7.5	30	0	0	0
7	7.5	31	0	0	1
7	7.5	32	0	0	1
7	7.5	33	0	0	1
7	7.5	34	0	0	1
7	7.5	35	0	0	0
7	7.5	36	0	1	0
7	7.5	37	0	0	0
7	7.5	38	0	0	1
7	7.5	39	0	0	0
7	7.5	40	0	0	1
7	7.5	41	0	1	0
7	7.5	42	0	1	0
7	7.5	43	0	1	0
7	7.5	44	0	0	1
7.5	8	1	0	1	0
7.5	8	2	0	0	0
7.5	8	3	0	1	0
7.5	8	4	0	1	0
7.5	8	5	0	0	0
7.5	8	6	0	0	0
7.5	8	7	0	1	0
7.5	8	8	0	1	0
7.5	8	9	0	1	0
7.5	8	10	0	0	0
7.5	8	11	0	1	0
7.5	8	12	0	0	0
7.5	8	13	0	1	0
7.5	8	14	0	0	1
7.5	8	15	0	0	1
7.5	8	16	0	0	1
7.5	8	17	0	0	0
7.5	8	18	0	0	1
7.5	8	19	0	0	0
7.5	8	20	0	0	0
7.5	8	21	0	0	0
7.5	8	22	0	0	1
7.5	8	23	0	0	0
7.5	8	24	0	0	1
7.5	8	25	0	1	0
7.5	8	26	0	0	1
7.5	8	27	0	0	0
7.5	8	28	0	1	0
7.5	8	29	0	1	1
7.5	8	30	0	0	1
7.5	8	31	0	0	1
7.5	8	32	0	0	1
7.5	8	33	0	0	0
7.5	8	34	0	0	1
7.5	8	35	0	0	0
7.5	8	36	0	1	0
7.5	8	37	0	0	1
7.5	8	38	0	0	0
7.5	8	39	0	0	1
7.5	8	40	0	0	1
7.5	8	41	0	0	1
7.5	8	42	0	1	0
7.5	8	43	0	1	0
7.5	8	44	0	0	1
7.5	8	45	0	0	1
8	8.5	1	0	1	0
8	8.5	2	0	0	0
8	8.5	3	0	1	0
8	8.5	4	0	1	0
8	8.5	5	0	0	1
8	8.5	6	0	0	0
8	8.5	7	0	1	1
8	8.5	8	0	1	0
8	8.5	9	0	1	0
8	8.5	10	0	0	0
8	8.5	11	0	1	0
8	8.5	12	0	1	0
8	8.5	13	0	1	0
8	8.5	14	0	0	1
8	8.5	15	0	0	1
8	8.5	16	0	0	1
8	8.5	17	0	0	1
8	8.5	18	0	0	1
8	8.5	19	0	0	1
8	8.5	20	0	0	0
8	8.5	21	0	1	0
8	8.5	22	0	0	1
8	8.5	23	0	0	1
8	8.5	24	0	1	0
8	8.5	25	0	0	1
8	8.5	26	0	0	1
8	8.5	27	0	0	0
8	8.5	28	0	1	0
8	8.5	29	0	1	1
8	8.5	30	0	0	1
8	8.5	31	0	0	1
8	8.5	32	0	0	1
8	8.5	33	0	1	0
8	8.5	34	0	0	1
8	8.5	35	0	0	0
8	8.5	36	0	0	0
8	8.5	37	0	0	1
8	8.5	38	0	0	1
8	8.5	39	0	0	1
8	8.5	40	0	0	0
8	8.5	41	0	0	1
8	8.5	42	0	1	0
8	8.5	43	0	1	0
8	8.5	44	0	0	1
8	8.5	45	0	0	1
8.5	9	1	0	1	0
8.5	9	2	0	0	0
8.5	9	3	0	1	0
8.5	9	4	0	0	0
8.5	9	5	0	0	1
8.5	9	6	0	0	0
8.5	9	7	0	1	1
8.5	9	8	0	1	0
8.5	9	9	0	1	0
8.5	9	10	0	0	0
8.5	9	11	0	1	1
8.5	9	12	0	1	0
8.5	9	13	0	0	0
8.5	9	14	0	0	1
8.5	9	15	0	0	0
8.5	9	16	0	0	1
8.5	9	17	0	1	0
8.5	9	18	0	0	1
8.5	9	19	0	0	0
8.5	9	20	0	0	0
8.5	9	21	0	0	1
8.5	9	22	0	0	0
8.5	9	23	0	0	0
8.5	9	24	0	1	0
8.5	9	25	0	0	1
8.5	9	26	0	0	1
8.5	9	27	0	0	0
8.5	9	28	0	1	1
8.5	9	29	0	0	1
8.5	9	30	0	0	1
8.5	9	31	0	0	1
8.5	9	32	0	0	1
8.5	9	33	0	1	0
8.5	9	34	0	0	1
8.5	9	35	0	0	0
8.5	9	36	0	0	0
8.5	9	37	0	0	1
8.5	9	38	0	0	1
8.5	9	39	0	0	0
8.5	9	40	0	0	0
8.5	9	41	0	0	1
8.5	9	42	0	1	0
8.5	9	43	0	1	0
8.5	9	44	0	0	0
8.5	9	45	0	0	1
9	9.5	1	0	1	0
9	9.5	2	0	0	1
9	9.5	3	0	0	0
9	9.5	4	0	0	1
9	9.5	5	0	0	0
9	9.5	6	0	0	0
9	9.5	7	0	0	0
9	9.5	8	0	1	0
9	9.5	9	0	0	0
9	9.5	10	0	1	0
9	9.5	11	0	1	0
9	9.5	12	0	1	1
9	9.5	13	0	1	0
9	9.5	14	0	1	0
9	9.5	15	0	0	0
9	9.5	16	0	0	1
9	9.5	17	0	0	0
9	9.5	18	0	0	1
9	9.5	19	0	0	0
9	9.5	20	0	0	0
9	9.5	21	0	0	1
9	9.5	22	0	0	0
9	9.5	23	0	0	0
9	9.5	24	0	0	0
9	9.5	25	0	0	1
9	9.5	26	0	1	0
9	9.5	27	0	0	1
9	9.5	28	0	0	1
9	9.5	29	0	0	0
9	9.5	30	0	1	1
9	9.5	31	0	0	1
9	9.5	32	0	0	1
9	9.5	33	0	0	1
9	9.5	34	0	0	1
9	9.5	35	0	1	0
9	9.5	36	0	0	1
9	9.5	37	0	0	0
9	9.5	38	0	1	0
9	9.5	39	0	0	1
9	9.5	40	0	0	1
9	9.5	41	0	0	0
9	9.5	42	0	0	0
9	9.5	43	0	0	1
9	9.5	44	0	1	0
9	9.5	45	0	1	0
9	9.5	46	0	0	1
9	9.5	47	0	0	1
9.5	10	1	0	1	0
9.5	10	2	0	0	1
9.5	10	3	0	0	0
9.5	10	4	0	0	0
9.5	10	5	0	0	1
9.5	10	6	0	0	1
9.5	10	7	0	0	0
9.5	10	8	0	0	0
9.5	10	9	0	0	0
9.5	10	10	0	1	1
9.5	10	11	0	1	0
9.5	10	12	0	1	0
9.5	10	13	0	0	1
9.5	10	14	0	0	1
9.5	10	15	0	0	1
9.5	10	16	0	0	0
9.5	10	17	0	1	0
9.5	10	18	0	0	1
9.5	10	19	0	0	1
9.5	10	20	0	0	0
9.5	10	21	0	0	1
9.5	10	22	0	0	0
9.5	10	23	0	0	1
9.5	10	24	0	1	0
9.5	10	25	0	0	1
9.5	10	26	0	0	0
9.5	10	27	0	0	1
9.5	10	28	0	0	1
9.5	10	29	0	0	1
9.5	10	30	0	0	0
9.5	10	31	0	0	1
9.5	10	32	0	1	0
9.5	10	33	0	0	1
9.5	10	34	0	0	0
9.5	10	35	0	1	0
9.5	10	36	0	0	1
9.5	10	37	0	0	1
9.5	10	38	0	0	1
9.5	10	39	0	0	0
9.5	10	40	0	0	1
9.5	10	41	0	1	0
9.5	10	42	0	1	0
9.5	10	43	0	0	1
9.5	10	44	0	0	1
10	10.5	1	0	1	0
10	10.5	2	0	0	0
10	10.5	3	0	0	0
10	10.5	4	0	0	0
10	10.5	5	0	0	1
10	10.5	6	0	0	0
10	10.5	7	0	0	1
10	10.5	8	0	0	0
10	10.5	9	0	0	1
10	10.5	10	0	1	0
10	10.5	11	0	1	0
10	10.5	12	0	1	1
10	10.5	13	1	1	0
10	10.5	14	0	0	1
10	10.5	15	0	0	1
10	10.5	16	0	0	0
10	10.5	17	0	0	0
10	10.5	18	0	1	0
10	10.5	19	0	0	1
10	10.5	20	0	0	0
10	10.5	21	0	0	0
10	10.5	22	0	0	1
10	10.5	23	0	0	0
10	10.5	24	0	0	1
10	10.5	25	0	0	1
10	10.5	26	0	0	1
10	10.5	27	0	0	1
10	10.5	28	0	0	0
10	10.5	29	0	0	1
10	10.5	30	0	0	0
10	10.5	31	0	0	0
10	10.5	32	0	0	1
10	10.5	33	0	1	0
10	10.5	34	0	0	1
10	10.5	35	0	1	0
10	10.5	36	0	1	0
10	10.5	37	0	0	1
10	10.5	38	0	0	0
10	10.5	39	0	0	1
10	10.5	40	0	0	0
10	10.5	41	0	0	1
10	10.5	42	0	1	0
10	10.5	43	0	1	0
10	10.5	44	0	0	0
10	10.5	45	0	0	1
10.5	11	1	0	1	0
10.5	11	2	0	0	0
10.5	11	3	0	0	0
10.5	11	4	0	0	0
10.5	11	5	0	0	0
10.5	11	6	0	0	0
10.5	11	7	0	0	0
10.5	11	8	0	0	0
10.5	11	9	0	0	0
10.5	11	10	0	1	0
10.5	11	11	0	1	0
10.5	11	12	0	1	1
10.5	11	13	0	1	0
10.5	11	14	0	0	0
10.5	11	15	0	0	1
10.5	11	16	0	0	0
10.5	11	17	0	0	0
10.5	11	18	0	0	0
10.5	11	19	0	1	0
10.5	11	20	0	0	0
10.5	11	21	0	0	0
10.5	11	22	0	1	0
10.5	11	23	0	0	0
10.5	11	24	0	0	0
10.5	11	25	0	0	0
10.5	11	26	0	0	0
10.5	11	27	0	0	1
10.5	11	28	0	0	1
10.5	11	29	0	0	0
10.5	11	30	0	0	1
10.5	11	31	0	0	1
10.5	11	32	0	0	0
10.5	11	33	0	1	0
10.5	11	34	0	0	1
10.5	11	35	0	1	0
10.5	11	36	0	0	1
10.5	11	37	0	1	0
10.5	11	38	0	1	0
10.5	11	39	0	0	1
10.5	11	40	0	0	1
10.5	11	41	0	0	0
10.5	11	42	0	0	0
10.5	11	43	0	0	1
10.5	11	44	0	1	0
10.5	11	45	0	1	0
10.5	11	46	0	0	1
10.5	11	47	0	0	0
11	11.5	1	0	1	0
11	11.5	2	0	0	0
11	11.5	3	0	0	0
11	11.5	4	0	0	0
11	11.5	5	0	0	0
11	11.5	6	0	0	0
11	11.5	7	0	0	0
11	11.5	8	0	0	0
11	11.5	9	0	1	0
11	11.5	10	0	1	0
11	11.5	11	0	0	0
11	11.5	12	0	1	0
11	11.5	13	0	1	0
11	11.5	14	0	0	1
11	11.5	15	0	0	1
11	11.5	16	0	0	0
11	11.5	17	0	0	0
11	11.5	18	0	1	0
11	11.5	19	0	0	1
11	11.5	20	0	0	1
11	11.5	21	0	1	0
11	11.5	22	0	0	1
11	11.5	23	0	0	0
11	11.5	24	0	1	0
11	11.5	25	0	0	1
11	11.5	26	0	0	1
11	11.5	27	0	0	0
11	11.5	28	0	0	0
11	11.5	29	0	0	1
11	11.5	30	0	0	0
11	11.5	31	0	1	0
11	11.5	32	0	0	1
11	11.5	33	0	1	0
11	11.5	34	0	0	1
11	11.5	35	0	1	0
11	11.5	36	0	1	0
11	11.5	37	0	0	0
11	11.5	38	0	0	1
11	11.5	39	0	0	0
11	11.5	40	0	0	0
11	11.5	41	0	0	1
11	11.5	42	0	1	0
11	11.5	43	0	1	0
11	11.5	44	0	0	1
11	11.5	45	0	0	1
11.5	12	1	0	1	0
11.5	12	2	0	0	1
11.5	12	3	0	0	0
11.5	12	4	0	0	0
11.5	12	5	0	0	1
11.5	12	6	0	0	0
11.5	12	7	0	0	0
11.5	12	8	0	0	0
11.5	12	9	0	1	0
11.5	12	10	0	1	0
11.5	12	11	0	1	0
11.5	12	12	0	0	1
11.5	12	13	0	0	1
11.5	12	14	0	0	1
11.5	12	15	0	1	0
11.5	12	16	0	1	0
11.5	12	17	0	0	1
11.5	12	18	0	0	1
11.5	12	19	0	1	0
11.5	12	20	0	0	1
11.5	12	21	0	0	0
11.5	12	22	0	0	1
11.5	12	23	0	0	1
11.5	12	24	0	0	0
11.5	12	25	0	1	0
11.5	12	26	0	0	1
11.5	12	27	0	1	0
11.5	12	28	0	1	0
11.5	12	29	0	0	1
11.5	12	30	0	1	0
11.5	12	31	0	0	1
11.5	12	32	0	1	0
11.5	12	33	0	1	0
11.5	12	34	0	1	0
11.5	12	35	0	0	0
11.5	12	36	0	0	1
11.5	12	37	0	0	1
11.5	12	38	0	0	1
11.5	12	39	0	0	0
11.5	12	40	0	0	0
11.5	12	41	0	0	1
11.5	12	42	0	0	1
12	12.5	1	0	1	0
12	12.5	2	0	0	1
12	12.5	3	0	0	0
12	12.5	4	0	0	0
12	12.5	5	0	0	1
12	12.5	6	0	0	1
12	12.5	7	0	0	1
12	12.5	8	0	0	1
12	12.5	9	0	1	0
12	12.5	10	0	1	0
12	12.5	11	0	1	1
12	12.5	12	0	1	0
12	12.5	13	0	1	1
12	12.5	14	0	0	0
12	12.5	15	0	0	1
12	12.5	16	0	0	0
12	12.5	17	0	1	0
12	12.5	18	0	1	0
12	12.5	19	0	0	0
12	12.5	20	0	0	0
12	12.5	21	0	1	0
12	12.5	22	0	0	1
12	12.5	23	0	0	0
12	12.5	24	0	0	0
12	12.5	25	0	0	0
12	12.5	26	0	0	1
12	12.5	27	0	0	1
12	12.5	28	0	0	0
12	12.5	29	0	1	0
12	12.5	30	0	0	1
12	12.5	31	0	1	1
12	12.5	32	0	0	1
12	12.5	33	0	0	0
12	12.5	34	0	0	1
12	12.5	35	0	1	0
12	12.5	36	0	1	0
12	12.5	37	0	1	0
12	12.5	38	0	0	1
12	12.5	39	0	0	0
12	12.5	40	0	0	1
12	12.5	41	0	0	0
12	12.5	42	0	0	1
12	12.5	43	0	0	0
12	12.5	44	0	0	1
12.5	13	1	0	1	0
12.5	13	2	0	0	0
12.5	13	3	0	0	0
12.5	13	4	0	0	0
12.5	13	5	0	0	0
12.5	13	6	0	0	0
12.5	13	7	0	0	1
12.5	13	8	0	0	1
12.5	13	9	0	0	0
12.5	13	10	0	1	0
12.5	13	11	0	1	1
12.5	13	12	0	1	0
12.5	13	13	0	0	0
12.5	13	14	0	0	1
12.5	13	15	0	0	0
12.5	13	16	0	1	0
12.5	13	17	0	0	0
12.5	13	18	0	0	0
12.5	13	19	0	0	0
12.5	13	20	0	1	0
12.5	13	21	0	0	1
12.5	13	22	0	0	0
12.5	13	23	0	0	0
12.5	13	24	0	0	0
12.5	13	25	0	0	0
12.5	13	26	0	0	1
12.5	13	27	0	0	0
12.5	13	28	0	1	0
12.5	13	29	0	0	1
12.5	13	30	0	1	0
12.5	13	31	0	0	1
12.5	13	32	0	0	0
12.5	13	33	0	0	1
12.5	13	34	0	1	0
12.5	13	35	0	1	0
12.5	13	36	0	1	0
12.5	13	37	0	0	1
12.5	13	38	0	0	0
12.5	13	39	0	0	0
12.5	13	40	0	0	1
12.5	13	41	0	0	0
12.5	13	42	0	0	1
12.5	13	43	0	0	0
12.5	13	44	0	0	1
13	13.5	1	0	1	0
13	13.5	2	0	0	0
13	13.5	3	0	0	0
13	13.5	4	0	0	1
13	13.5	5	0	0	0
13	13.5	6	0	0	0
13	13.5	7	0	0	0
13	13.5	8	0	1	0
13	13.5	9	0	1	0
13	13.5	10	0	0	0
13	13.5	11	0	1	0
13	13.5	12	0	0	1
13	13.5	13	0	0	1
13	13.5	14	0	0	1
13	13.5	15	0	0	0
13	13.5	16	0	0	1
13	13.5	17	0	0	1
13	13.5	18	0	1	0
13	13.5	19	0	0	1
13	13.5	20	0	1	0
13	13.5	21	0	0	0
13	13.5	22	0	0	1
13	13.5	23	0	0	1
13	13.5	24	0	0	0
13	13.5	25	0	1	0
13	13.5	26	0	0	1
13	13.5	27	0	0	1
13	13.5	28	0	1	0
13	13.5	29	0	0	1
13	13.5	30	0	0	0
13	13.5	31	0	0	1
13	13.5	32	0	1	0
13	13.5	33	0	1	0
13	13.5	34	0	1	0
13	13.5	35	0	0	0
13	13.5	36	0	0	1
13	13.5	37	0	0	0
13	13.5	38	0	0	1
13	13.5	39	0	0	1
13	13.5	40	0	0	0
13	13.5	41	0	0	0
13	13.5	42	0	0	1
13.5	14	1	0	1	0
13.5	14	2	0	0	1
13.5	14	3	0	0	0
13.5	14	4	0	0	0
13.5	14	5	0	0	1
13.5	14	6	0	0	0
13.5	14	7	0	0	0
13.5	14	8	0	0	0
13.5	14	9	0	1	0
13.5	14	10	0	1	0
13.5	14	11	0	1	0
13.5	14	12	0	1	0
13.5	14	13	0	1	1
13.5	14	14	0	0	1
13.5	14	15	0	0	1
13.5	14	16	0	0	1
13.5	14	17	0	1	0
13.5	14	18	0	1	0
13.5	14	19	0	0	0
13.5	14	20	0	0	1
13.5	14	21	0	1	0
13.5	14	22	0	0	1
13.5	14	23	0	1	0
13.5	14	24	0	1	0
13.5	14	25	0	0	1
13.5	14	26	0	0	0
13.5	14	27	0	1	0
13.5	14	28	0	0	1
13.5	14	29	0	1	1
13.5	14	30	0	0	1
13.5	14	31	0	0	0
13.5	14	32	0	0	1
13.5	14	33	0	1	0
13.5	14	34	0	1	0
13.5	14	35	0	1	0
13.5	14	36	0	0	1
13.5	14	37	0	0	1
13.5	14	38	0	0	1
13.5	14	39	0	0	0
13.5	14	40	0	0	1
13.5	14	41	0	0	0
13.5	14	42	0	0	1
14	14.5	1	0	0	0
14	14.5	2	0	0	1
14	14.5	3	0	0	0
14	14.5	4	0	0	0
14	14.5	5	0	0	0
14	14.5	6	0	0	0
14	14.5	7	0	0	1
14	14.5	8	0	0	0
14	14.5	9	0	1	0
14	14.5	10	0	1	0
14	14.5	11	0	1	0
14	14.5	12	0	1	1
14	14.5	13	0	0	0
14	14.5	14	0	0	0
14	14.5	15	0	0	0
14	14.5	16	0	1	0
14	14.5	17	0	1	0
14	14.5	18	0	0	0
14	14.5	19	0	0	0
14	14.5	20	0	1	0
14	14.5	21	0	0	1
14	14.5	22	0	0	0
14	14.5	23	0	1	0
14	14.5	24	0	1	0
14	14.5	25	0	0	1
14	14.5	26	0	0	1
14	14.5	27	0	0	0
14	14.5	28	0	1	0
14	14.5	29	0	0	0
14	14.5	30	0	0	1
14	14.5	31	0	1	1
14	14.5	32	0	0	1
14	14.5	33	0	1	0
14	14.5	34	0	0	1
14	14.5	35	0	0	0
14	14.5	36	0	1	0
14	14.5	37	0	1	0
14	14.5	38	0	0	1
14	14.5	39	0	0	0
14	14.5	40	0	0	1
14	14.5	41	0	0	1
14	14.5	42	0	0	1
14	14.5	43	0	0	1
14	14.5	44	0	1	0
14	14.5	45	0	0	1
14.5	15	1	0	1	0
14.5	15	2	0	0	0
14.5	15	3	0	0	0
14.5	15	4	0	0	0
14.5	15	5	0	0	0
14.5	15	6	0	0	1
14.5	15	7	0	0	1
14.5	15	8	0	1	0
14.5	15	9	1	1	0
14.5	15	10	0	1	0
14.5	15	11	0	1	0
14.5	15	12	0	0	1
14.5	15	13	0	0	1
14.5	15	14	0	0	0
14.5	15	15	0	1	0
14.5	15	16	0	1	0
14.5	15	17	0	0	1
14.5	15	18	0	0	0
14.5	15	19	0	1	0
14.5	15	20	0	0	0
14.5	15	21	0	0	0
14.5	15	22	1	1	0
14.5	15	23	0	1	0
14.5	15	24	0	0	1
14.5	15	25	0	1	0
14.5	15	26	0	1	0
14.5	15	27	0	0	1
14.5	15	28	0	1	0
14.5	15	29	0	0	1
14.5	15	30	0	1	0
14.5	15	31	0	0	1
14.5	15	32	0	0	0
14.5	15	33	0	1	0
14.5	15	34	0	1	0
14.5	15	35	0	0	1
14.5	15	36	0	0	0
14.5	15	37	0	0	0
14.5	15	38	0	0	1
14.5	15	39	0	0	1
14.5	15	40	0	0	0
14.5	15	41	0	1	0
14.5	15	42	0	0	1
15	15.5	1	0	1	0
15	15.5	2	0	0	0
15	15.5	3	0	0	0
15	15.5	4	0	0	0
15	15.5	5	0	0	1
15	15.5	6	0	0	0
15	15.5	7	0	0	0
15	15.5	8	1	1	0
15	15.5	9	1	1	0
15	15.5	10	0	1	0
15	15.5	11	0	1	0
15	15.5	12	0	0	0
15	15.5	13	0	0	1
15	15.5	14	0	0	1
15	15.5	15	0	0	1
15	15.5	16	0	1	0
15	15.5	17	0	1	0
15	15.5	18	0	0	1
15	15.5	19	0	0	0
15	15.5	20	0	1	0
15	15.5	21	0	0	1
15	15.5	22	0	0	0
15	15.5	23	1	1	0
15	15.5	24	0	1	0
15	15.5	25	0	0	1
15	15.5	26	0	0	1
15	15.5	27	0	1	0
15	15.5	28	0	0	0
15	15.5	29	0	0	1
15	15.5	30	0	0	0
15	15.5	31	0	0	1
15	15.5	32	0	1	0
15	15.5	33	0	0	1
15	15.5	34	0	0	0
15	15.5	35	0	0	0
15	15.5	36	0	1	0
15	15.5	37	0	0	1
15	15.5	38	0	0	0
15	15.5	39	0	0	1
15	15.5	40	0	0	0
15	15.5	41	0	0	1
15	15.5	42	0	1	0
15	15.5	43	0	0	1
15.5	16	1	0	1	0
15.5	16	2	0	0	0
15.5	16	3	0	0	0
15.5	16	4	0	0	0
15.5	16	5	0	0	1
15.5	16	6	0	0	0
15.5	16	7	0	0	0
15.5	16	8	0	1	0
15.5	16	9	0	0	0
15.5	16	10	0	1	0
15.5	16	11	0	1	0
15.5	16	12	0	1	0
15.5	16	13	0	1	0
15.5	16	14	1	1	0
15.5	16	15	0	0	0
15.5	16	16	0	0	1
15.5	16	17	0	1	1
15.5	16	18	0	1	0
15.5	16	19	0	1	0
15.5	16	20	0	1	0
15.5	16	21	0	0	0
15.5	16	22	0	1	0
15.5	16	23	0	1	0
15.5	16	24	0	1	1
15.5	16	25	0	0	0
15.5	16	26	1	1	0
15.5	16	27	0	1	0
15.5	16	28	0	1	0
15.5	16	29	0	1	1
15.5	16	30	0	1	0
15.5	16	31	0	0	0
15.5	16	32	0	1	0
15.5	16	33	1	1	0
15.5	16	34	0	0	0
15.5	16	35	0	0	1
15.5	16	36	0	1	0
15.5	16	37	0	1	1
15.5	16	38	0	1	0
15.5	16	39	0	0	0
15.5	16	40	0	1	0
15.5	16	41	0	0	1
15.5	16	42	0	0	0
15.5	16	43	0	1	0
15.5	16	44	0	0	1
15.5	16	45	0	1	0
15.5	16	46	0	1	1
15.5	16	47	0	1	0
15.5	16	48	0	1	1
16	16.5	1	0	1	0
16	16.5	2	0	1	0
16	16.5	3	0	1	0
16	16.5	4	0	1	0
16	16.5	5	0	0	0
16	16.5	6	0	1	0
16	16.5	7	1	1	0
16	16.5	8	1	1	0
16	16.5	9	0	1	0
16	16.5	10	1	1	0
16	16.5	11	1	1	0
16	16.5	12	0	1	0
16	16.5	13	0	1	0
16	16.5	14	0	0	0
16	16.5	15	0	0	0
16	16.5	16	1	1	0
16	16.5	17	0	1	0
16	16.5	18	0	1	0
16	16.5	19	1	1	0
16	16.5	20	0	1	0
16	16.5	21	0	1	0
16	16.5	22	1	1	0
16	16.5	23	1	1	0
16	16.5	24	0	1	0
16	16.5	25	0	1	0
16	16.5	26	1	1	0
16	16.5	27	0	1	0
16	16.5	28	0	1	0
16	16.5	29	0	1	0
16	16.5	30	0	0	0
16	16.5	31	0	1	0
16	16.5	32	0	1	0
16	16.5	33	0	1	0
16	16.5	34	0	1	0
16	16.5	35	1	1	0
16	16.5	36	0	1	0
16	16.5	37	0	1	0
16	16.5	38	0	1	0
16	16.5	39	1	1	0
16	16.5	40	0	1	0
16	16.5	41	0	1	0
16	16.5	42	0	1	0
16	16.5	43	1	1	0
16	16.5	44	0	1	0
16	16.5	45	1	1	0
16	16.5	46	0	1	0
16	16.5	47	0	1	0
16.5	17	1	0	1	0
16.5	17	2	1	1	0
16.5	17	3	1	1	0
16.5	17	4	0	1	0
16.5	17	5	0	1	0
16.5	17	6	1	1	0
16.5	17	7	1	1	0
16.5	17	8	0	1	0
16.5	17	9	1	1	0
16.5	17	10	1	1	0
16.5	17	11	1	1	0
16.5	17	12	0	1	0
16.5	17	13	0	1	0
16.5	17	14	0	0	0
16.5	17	15	0	1	0
16.5	17	16	0	1	0
16.5	17	17	0	1	0
16.5	17	18	0	1	0
16.5	17	19	1	1	0
16.5	17	20	1	1	0
16.5	17	21	0	1	0
16.5	17	22	1	1	0
16.5	17	23	1	1	0
16.5	17	24	0	1	0
16.5	17	25	0	1	0
16.5	17	26	0	1	0
16.5	17	27	1	1	0
16.5	17	28	1	1	0
16.5	17	29	0	1	0
16.5	17	30	0	1	0
16.5	17	31	0	1	0
16.5	17	32	1	1	0
16.5	17	33	0	1	1
16.5	17	34	0	1	0
16.5	17	35	0	1	0
16.5	17	36	1	1	0
16.5	17	37	0	1	0
16.5	17	38	0	1	0
16.5	17	39	1	1	0
16.5	17	40	1	1	0
16.5	17	41	0	1	0
16.5	17	42	0	1	0
16.5	17	43	1	1	0
16.5	17	44	0	1	0
16.5	17	45	1	1	0
16.5	17	46	1	1	0
16.5	17	47	1	1	0
17	17.5	1	0	1	0
17	17.5	2	1	1	0
17	17.5	3	1	1	0
17	17.5	4	0	1	0
17	17.5	5	0	1	0
17	17.5	6	1	1	0
17	17.5	7	1	1	0
17	17.5	8	1	1	0
17	17.5	9	0	1	0
17	17.5	10	1	1	0
17	17.5	11	0	1	0
17	17.5	12	1	1	0
17	17.5	13	1	1	0
17	17.5	14	0	1	0
17	17.5	15	0	1	0
17	17.5	16	1	1	0
17	17.5	17	1	1	0
17	17.5	18	1	1	0
17	17.5	19	0	1	0
17	17.5	20	1	1	0
17	17.5	21	1	1	0
17	17.5	22	1	1	0
17	17.5	23	1	1	0
17	17.5	24	1	1	0
17	17.5	25	0	1	0
17	17.5	26	1	1	0
17	17.5	27	0	1	0
17	17.5	28	0	1	0
17	17.5	29	1	1	0
17	17.5	30	0	1	0
17	17.5	31	0	1	0
17	17.5	32	1	1	0
17	17.5	33	0	1	0
17	17.5	34	0	1	0
17	17.5	35	1	1	0
17	17.5	36	0	1	0
17	17.5	37	0	1	0
17	17.5	38	0	1	0
17	17.5	39	0	1	0
17	17.5	40	1	1	0
17	17.5	41	1	1	0
17	17.5	42	0	1	0
17	17.5	43	0	1	0
17	17.5	44	1	1	0
17	17.5	45	1	1	0
17	17.5	46	1	1	0
17.5	18	1	0	1	0
17.5	18	2	1	1	0
17.5	18	3	0	1	0
17.5	18	4	0	1	0
17.5	18	5	0	1	0
17.5	18	6	1	1	0
17.5	18	7	1	1	0
17.5	18	8	0	1	0
17.5	18	9	1	1	0
17.5	18	10	0	1	0
17.5	18	11	0	1	0
17.5	18	12	0	1	0
17.5	18	13	1	1	0
17.5	18	14	0	1	0
17.5	18	15	1	1	0
17.5	18	16	1	1	0
17.5	18	17	1	1	0
17.5	18	18	1	1	0
17.5	18	19	1	1	0
17.5	18	20	0	1	0
17.5	18	21	0	1	0
17.5	18	22	0	1	0
17.5	18	23	1	1	0
17.5	18	24	0	1	0
17.5	18	25	0	1	0
17.5	18	26	1	1	0
17.5	18	27	0	1	0
17.5	18	28	1	1	0
17.5	18	29	0	1	0
17.5	18	30	0	1	1
17.5	18	31	0	1	0
17.5	18	32	0	1	0
17.5	18	33	1	1	0
17.5	18	34	1	1	0
17.5	18	35	0	1	0
17.5	18	36	1	1	0
17.5	18	37	1	1	0
17.5	18	38	1	1	0
17.5	18	39	1	1	0
17.5	18	40	1	1	0
17.5	18	41	0	1	0
17.5	18	42	0	1	0
17.5	18	43	1	1	0
17.5	18	44	0	1	0
17.5	18	45	1	1	0
18	18.5	1	0	1	0
18	18.5	2	0	0	0
18	18.5	3	0	1	0
18	18.5	4	0	1	0
18	18.5	5	0	1	0
18	18.5	6	1	1	0
18	18.5	7	0	1	0
18	18.5	8	0	0	0
18	18.5	9	0	1	0
18	18.5	10	0	0	0
18	18.5	11	0	1	0
18	18.5	12	0	1	0
18	18.5	13	1	1	0
18	18.5	14	0	1	0
18	18.5	15	1	1	0
18	18.5	16	1	1	0
18	18.5	17	0	0	0
18	18.5	18	0	1	0
18	18.5	19	0	1	0
18	18.5	20	0	1	0
18	18.5	21	0	0	0
18	18.5	22	0	0	0
18	18.5	23	0	1	0
18	18.5	24	0	1	0
18	18.5	25	0	1	0
18	18.5	26	0	1	0
18	18.5	27	0	0	0
18	18.5	28	0	1	1
18	18.5	29	0	0	0
18	18.5	30	1	1	0
18	18.5	31	1	1	0
18	18.5	32	0	1	0
18	18.5	33	0	1	0
18	18.5	34	1	1	0
18	18.5	35	0	1	0
18	18.5	36	1	1	0
18	18.5	37	1	1	0
18	18.5	38	1	1	0
18	18.5	39	0	1	1
18	18.5	40	0	1	1
18	18.5	41	1	1	0
18	18.5	42	0	1	0
18	18.5	43	1	1	0
18.5	19	1	1	1	0
18.5	19	2	0	0	0
18.5	19	3	0	1	0
18.5	19	4	0	0	1
18.5	19	5	0	0	0
18.5	19	6	1	1	0
18.5	19	7	0	0	0
18.5	19	8	0	0	0
18.5	19	9	0	0	0
18.5	19	10	0	1	0
18.5	19	11	0	1	0
18.5	19	12	1	1	0
18.5	19	13	0	1	1
18.5	19	14	1	1	0
18.5	19	15	1	1	0
18.5	19	16	1	1	1
18.5	19	17	1	1	0
18.5	19	18	0	1	0
18.5	19	19	1	1	0
18.5	19	20	0	0	1
18.5	19	21	0	0	0
18.5	19	22	0	0	0
18.5	19	23	0	1	0
18.5	19	24	0	1	0
18.5	19	25	0	0	1
18.5	19	26	0	1	0
18.5	19	27	0	1	0
18.5	19	28	1	1	0
18.5	19	29	0	1	0
18.5	19	30	0	1	1
18.5	19	31	1	1	0
18.5	19	32	0	1	0
18.5	19	33	0	1	0
18.5	19	34	1	1	0
18.5	19	35	1	1	0
18.5	19	36	0	1	0
18.5	19	37	1	1	0
18.5	19	38	0	1	0
18.5	19	39	1	1	0
18.5	19	40	1	1	0
18.5	19	41	0	1	1
18.5	19	42	1	1	0
18.5	19	43	0	0	0
18.5	19	44	1	1	0
19	19.5	1	0	1	0
19	19.5	2	0	0	1
19	19.5	3	0	1	0
19	19.5	4	0	0	1
19	19.5	5	0	0	1
19	19.5	6	0	1	0
19	19.5	7	0	0	0
19	19.5	8	0	0	0
19	19.5	9	0	0	0
19	19.5	10	0	1	0
19	19.5	11	0	1	1
19	19.5	12	0	0	0
19	19.5	13	0	0	1
19	19.5	14	0	1	0
19	19.5	15	1	1	0
19	19.5	16	1	1	0
19	19.5	17	1	1	0
19	19.5	18	0	1	0
19	19.5	19	0	1	0
19	19.5	20	0	1	0
19	19.5	21	0	1	0
19	19.5	22	0	1	1
19	19.5	23	0	0	0
19	19.5	24	0	0	1
19	19.5	25	1	1	0
19	19.5	26	0	1	0
19	19.5	27	0	0	1
19	19.5	28	0	0	1
19	19.5	29	0	0	1
19	19.5	30	0	1	0
19	19.5	31	1	1	0
19	19.5	32	0	0	1
19	19.5	33	0	1	0
19	19.5	34	0	1	0
19	19.5	35	1	1	0
19	19.5	36	0	1	0
19	19.5	37	0	1	0
19	19.5	38	0	1	0
19	19.5	39	0	1	0
19	19.5	40	0	0	0
19	19.5	41	0	1	0
19	19.5	42	1	1	0
19	19.5	43	0	0	1
19	19.5	44	1	1	0
19	19.5	45	0	0	1
19	19.5	46	0	1	0
19.5	20	1	0	0	0
19.5	20	2	0	0	1
19.5	20	3	0	1	1
19.5	20	4	0	0	1
19.5	20	5	0	0	1
19.5	20	6	0	0	0
19.5	20	7	0	0	1
19.5	20	8	0	0	1
19.5	20	9	0	0	0
19.5	20	10	0	1	0
19.5	20	11	1	1	0
19.5	20	12	0	0	1
19.5	20	13	0	0	0
19.5	20	14	0	0	1
19.5	20	15	0	0	0
19.5	20	16	0	1	0
19.5	20	17	0	1	0
19.5	20	18	1	1	0
19.5	20	19	0	1	0
19.5	20	20	0	1	0
19.5	20	21	0	1	0
19.5	20	22	0	1	1
19.5	20	23	0	1	1
19.5	20	24	0	0	1
19.5	20	25	1	1	0
19.5	20	26	0	1	0
19.5	20	27	0	1	1
19.5	20	28	0	0	1
19.5	20	29	0	0	1
19.5	20	30	1	1	0
19.5	20	31	1	1	0
19.5	20	32	0	1	0
19.5	20	33	0	0	1
19.5	20	34	0	0	0
19.5	20	35	0	1	0
19.5	20	36	0	1	0
19.5	20	37	0	1	0
19.5	20	38	0	1	1
19.5	20	39	1	1	0
19.5	20	40	0	0	1
19.5	20	41	0	0	0
19.5	20	42	0	1	0
19.5	20	43	0	1	1
19.5	20	44	0	0	0
19.5	20	45	0	1	1
19.5	20	46	0	0	0
20	20.5	1	0	0	0
20	20.5	2	0	0	0
20	20.5	3	0	1	1
20	20.5	4	0	0	1
20	20.5	5	0	0	1
20	20.5	6	0	0	1
20	20.5	7	0	0	1
20	20.5	8	0	0	1
20	20.5	9	0	1	0
20	20.5	10	1	1	0
20	20.5	11	0	0	0
20	20.5	12	1	1	0
20	20.5	13	0	0	1
20	20.5	14	0	0	1
20	20.5	15	0	0	0
20	20.5	16	0	1	0
20	20.5	17	1	1	0
20	20.5	18	0	1	0
20	20.5	19	0	1	1
20	20.5	20	0	0	0
20	20.5	21	1	1	1
20	20.5	22	0	0	1
20	20.5	23	0	1	0
20	20.5	24	0	1	0
20	20.5	25	0	1	0
20	20.5	26	0	0	1
20	20.5	27	0	0	1
20	20.5	28	1	1	0
20	20.5	29	1	1	0
20	20.5	30	1	1	0
20	20.5	31	0	0	1
20	20.5	32	0	0	1
20	20.5	33	0	1	0
20	20.5	34	1	1	0
20	20.5	35	0	1	0
20	20.5	36	0	0	1
20	20.5	37	0	1	0
20	20.5	38	1	1	0
20	20.5	39	1	1	1
20	20.5	40	0	0	1
20	20.5	41	0	0	0
20	20.5	42	0	0	1
20	20.5	43	0	0	0
20	20.5	44	0	1	1
20	20.5	45	0	0	1
20.5	21	1	0	0	1
20.5	21	2	0	0	1
20.5	21	3	0	0	1
20.5	21	4	0	0	1
20.5	21	5	0	0	1
20.5	21	6	0	0	1
20.5	21	7	0	0	0
20.5	21	8	0	0	1
20.5	21	9	0	0	0
20.5	21	10	0	1	0
20.5	21	11	0	1	0
20.5	21	12	0	0	1
20.5	21	13	1	1	0
20.5	21	14	0	0	1
20.5	21	15	0	0	0
20.5	21	16	0	1	0
20.5	21	17	0	0	1
20.5	21	18	0	0	0
20.5	21	19	0	1	0
20.5	21	20	0	1	0
20.5	21	21	0	0	0
20.5	21	22	0	0	1
20.5	21	23	0	1	0
20.5	21	24	1	1	0
20.5	21	25	0	0	1
20.5	21	26	0	1	0
20.5	21	27	0	1	0
20.5	21	28	0	1	0
20.5	21	29	0	0	1
20.5	21	30	0	0	1
20.5	21	31	0	1	0
20.5	21	32	0	0	0
20.5	21	33	0	1	0
20.5	21	34	0	0	0
20.5	21	35	0	1	1
20.5	21	36	1	1	0
20.5	21	37	1	1	0
20.5	21	38	0	1	0
20.5	21	39	0	1	1
20.5	21	40	0	1	0
20.5	21	41	0	0	0
20.5	21	42	1	1	0
20.5	21	43	0	0	1
20.5	21	44	0	0	1
20.5	21	45	0	0	1
20.5	21	46	0	0	1
20.5	21	47	0	1	0
20.5	21	48	0	0	1
21	21.5	1	0	1	1
21	21.5	2	0	0	1
21	21.5	3	0	0	1
21	21.5	4	0	0	0
21	21.5	5	0	0	1
21	21.5	6	0	0	0
21	21.5	7	0	0	1
21	21.5	8	0	0	1
21	21.5	9	0	0	0
21	21.5	10	0	0	0
21	21.5	11	0	1	0
21	21.5	12	0	0	1
21	21.5	13	0	1	0
21	21.5	14	0	0	1
21	21.5	15	0	0	1
21	21.5	16	0	1	1
21	21.5	17	0	0	1
21	21.5	18	0	0	1
21	21.5	19	0	0	1
21	21.5	20	0	0	0
21	21.5	21	0	0	0
21	21.5	22	0	0	1
21	21.5	23	0	1	0
21	21.5	24	0	0	0
21	21.5	25	0	1	0
21	21.5	26	0	1	0
21	21.5	27	1	1	0
21	21.5	28	0	0	1
21	21.5	29	0	0	1
21	21.5	30	0	1	0
21	21.5	31	0	0	0
21	21.5	32	0	1	0
21	21.5	33	0	0	1
21	21.5	34	1	1	0
21	21.5	35	1	1	0
21	21.5	36	1	1	0
21	21.5	37	0	1	0
21	21.5	38	0	1	1
21	21.5	39	0	1	0
21	21.5	40	0	0	0
21	21.5	41	0	1	0
21	21.5	42	0	0	1
21	21.5	43	0	0	1
21	21.5	44	0	0	1
21	21.5	45	0	0	1
21	21.5	46	0	1	0
21	21.5	47	0	0	1
21.5	22	1	0	0	0
21.5	22	2	0	0	1
21.5	22	3	0	0	0
21.5	22	4	0	0	1
21.5	22	5	0	0	0
21.5	22	6	0	0	0
21.5	22	7	0	0	1
21.5	22	8	0	0	0
21.5	22	9	0	0	0
21.5	22	10	0	1	0
21.5	22	11	0	0	1
21.5	22	12	0	1	0
21.5	22	13	0	0	1
21.5	22	14	0	0	1
21.5	22	15	0	0	1
21.5	22	16	0	0	1
21.5	22	17	0	0	1
21.5	22	18	0	0	1
21.5	22	19	0	0	1
21.5	22	20	0	1	0
21.5	22	21	0	0	1
21.5	22	22	0	1	0
21.5	22	23	0	1	0
21.5	22	24	0	0	0
21.5	22	25	0	1	0
21.5	22	26	0	1	0
21.5	22	27	0	1	0
21.5	22	28	0	0	1
21.5	22	29	0	0	1
21.5	22	30	0	1	0
21.5	22	31	0	0	1
21.5	22	32	0	0	1
21.5	22	33	0	0	1
21.5	22	34	0	1	0
21.5	22	35	1	1	0
21.5	22	36	0	1	0
21.5	22	37	0	0	1
21.5	22	38	0	0	0
21.5	22	39	0	0	1
21.5	22	40	0	1	0
21.5	22	41	0	0	1
21.5	22	42	0	0	1
21.5	22	43	0	0	1
21.5	22	44	0	0	1
21.5	22	45	0	1	1
21.5	22	46	0	0	1
22	22.5	1	0	0	1
22	22.5	2	0	0	1
22	22.5	3	0	0	0
22	22.5	4	0	0	0
22	22.5	5	0	0	1
22	22.5	6	0	0	1
22	22.5	7	0	0	0
22	22.5	8	0	0	0
22	22.5	9	0	0	0
22	22.5	10	0	1	0
22	22.5	11	0	0	1
22	22.5	12	0	0	0
22	22.5	13	0	0	1
22	22.5	14	0	0	0
22	22.5	15	0	0	1
22	22.5	16	0	0	1
22	22.5	17	0	0	0
22	22.5	18	0	0	1
22	22.5	19	0	1	0
22	22.5	20	0	0	1
22	22.5	21	0	1	0
22	22.5	22	0	1	0
22	22.5	23	0	0	0
22	22.5	24	0	0	0
22	22.5	25	0	1	0
22	22.5	26	0	1	0
22	22.5	27	0	0	1
22	22.5	28	0	0	1
22	22.5	29	0	1	1
22	22.5	30	0	0	1
22	22.5	31	0	0	0
22	22.5	32	0	0	0
[truncated: 3,409 more rows]

## Sheet: attP2>CsChr-data
timeBinStart	timeBinStop	larva	boolRoll	boolBend	boolCrawl
0	0.5	1	0	0	0
0	0.5	2	0	0	0
0	0.5	3	0	1	0
0	0.5	4	0	0	0
0	0.5	5	0	1	0
0	0.5	6	0	0	0
0	0.5	7	0	0	0
0	0.5	8	0	0	0
0	0.5	9	0	0	0
0	0.5	10	0	0	0
0	0.5	11	0	0	0
0	0.5	12	0	0	0
0	0.5	13	0	0	0
0	0.5	14	0	0	0
0	0.5	15	0	0	0
0	0.5	16	0	1	0
0	0.5	17	0	0	0
0	0.5	18	0	0	0
0	0.5	19	0	0	0
0	0.5	20	0	0	0
0	0.5	21	0	1	0
0	0.5	22	0	0	0
0	0.5	23	0	1	0
0	0.5	24	0	1	0
0	0.5	25	0	0	0
0	0.5	26	0	0	0
0	0.5	27	0	0	0
0	0.5	28	0	0	0
0	0.5	29	0	0	0
0	0.5	30	0	0	0
0	0.5	31	0	0	0
0	0.5	32	0	0	0
0	0.5	33	0	0	0
0	0.5	34	0	0	0
0	0.5	35	0	0	0
0	0.5	36	0	0	0
0	0.5	37	0	0	0
0	0.5	38	0	0	0
0	0.5	39	0	0	0
0	0.5	40	0	0	0
0	0.5	41	0	0	0
0	0.5	42	0	0	0
0	0.5	43	0	0	0
0	0.5	44	0	0	0
0	0.5	45	0	1	0
0	0.5	46	0	1	0
0	0.5	47	0	0	0
0	0.5	48	0	0	0
0	0.5	49	0	0	0
0	0.5	50	0	0	0
0	0.5	51	0	0	0
0	0.5	52	0	0	0
0	0.5	53	0	0	0
0.5	1	1	0	0	0
0.5	1	2	0	0	0
0.5	1	3	0	1	0
0.5	1	4	0	0	0
0.5	1	5	0	1	0
0.5	1	6	0	0	0
0.5	1	7	0	0	1
0.5	1	8	0	0	0
0.5	1	9	0	0	0
0.5	1	10	0	0	0
0.5	1	11	0	0	0
0.5	1	12	0	0	1
0.5	1	13	0	0	0
0.5	1	14	0	0	0
0.5	1	15	0	0	1
0.5	1	16	0	1	0
0.5	1	17	0	0	0
0.5	1	18	0	0	1
0.5	1	19	0	0	0
0.5	1	20	0	0	0
0.5	1	21	0	1	0
0.5	1	22	0	0	1
0.5	1	23	0	1	1
0.5	1	24	0	1	0
0.5	1	25	0	0	1
0.5	1	26	0	0	0
0.5	1	27	0	0	0
0.5	1	28	0	0	0
0.5	1	29	0	0	0
0.5	1	30	0	0	0
0.5	1	31	0	0	0
0.5	1	32	0	0	0
0.5	1	33	0	0	0
0.5	1	34	0	0	1
0.5	1	35	0	0	0
0.5	1	36	0	0	0
0.5	1	37	0	0	0
0.5	1	38	0	1	0
0.5	1	39	0	0	0
0.5	1	40	0	0	0
0.5	1	41	0	0	0
0.5	1	42	0	0	1
0.5	1	43	0	0	1
0.5	1	44	0	0	0
0.5	1	45	0	1	0
0.5	1	46	0	1	0
0.5	1	47	0	0	0
0.5	1	48	0	0	1
0.5	1	49	0	0	1
0.5	1	50	0	0	0
0.5	1	51	0	0	0
0.5	1	52	0	0	0
0.5	1	53	0	0	0
1	1.5	1	0	0	0
1	1.5	2	0	0	0
1	1.5	3	0	1	0
1	1.5	4	0	0	0
1	1.5	5	0	1	0
1	1.5	6	0	0	0
1	1.5	7	0	0	1
1	1.5	8	0	0	0
1	1.5	9	0	0	0
1	1.5	10	0	0	0
1	1.5	11	0	1	1
1	1.5	12	0	0	0
1	1.5	13	0	0	0
1	1.5	14	0	0	1
1	1.5	15	0	1	0
1	1.5	16	0	0	0
1	1.5	17	0	0	1
1	1.5	18	0	0	0
1	1.5	19	0	0	0
1	1.5	20	0	1	0
1	1.5	21	0	0	1
1	1.5	22	0	1	1
1	1.5	23	0	0	0
1	1.5	24	0	0	1
1	1.5	25	0	0	0
1	1.5	26	0	0	0
1	1.5	27	0	0	1
1	1.5	28	0	0	0
1	1.5	29	0	0	0
1	1.5	30	0	0	0
1	1.5	31	0	0	0
1	1.5	32	0	0	0
1	1.5	33	0	0	1
1	1.5	34	0	0	1
1	1.5	35	0	0	0
1	1.5	36	0	0	0
1	1.5	37	0	0	1
1	1.5	38	0	0	0
1	1.5	39	0	0	0
1	1.5	40	0	0	0
1	1.5	41	0	0	1
1	1.5	42	0	0	1
1	1.5	43	0	0	0
1	1.5	44	0	0	0
1	1.5	45	0	1	1
1	1.5	46	0	0	0
1	1.5	47	0	0	1
1	1.5	48	0	0	1
1	1.5	49	0	0	0
1	1.5	50	0	0	0
1	1.5	51	0	0	0
1	1.5	52	0	0	0
1.5	2	1	0	0	0
1.5	2	2	0	0	1
1.5	2	3	0	1	0
1.5	2	4	0	0	0
1.5	2	5	0	1	0
1.5	2	6	0	0	0
1.5	2	7	0	0	0
1.5	2	8	0	0	1
1.5	2	9	0	1	0
1.5	2	10	0	0	0
1.5	2	11	0	0	0
1.5	2	12	0	1	1
1.5	2	13	0	1	0
1.5	2	14	0	0	0
1.5	2	15	0	0	1
1.5	2	16	0	1	0
1.5	2	17	0	0	1
1.5	2	18	0	0	1
1.5	2	19	0	0	0
1.5	2	20	0	0	0
1.5	2	21	0	1	0
1.5	2	22	0	0	1
1.5	2	23	0	1	1
1.5	2	24	0	0	1
1.5	2	25	0	0	1
1.5	2	26	0	0	0
1.5	2	27	0	0	0
1.5	2	28	0	0	1
1.5	2	29	0	1	0
1.5	2	30	0	0	0
1.5	2	31	0	0	0
1.5	2	32	0	0	1
1.5	2	33	0	0	0
1.5	2	34	0	0	1
1.5	2	35	0	0	1
1.5	2	36	0	0	0
1.5	2	37	0	0	1
1.5	2	38	0	1	1
1.5	2	39	0	0	0
1.5	2	40	0	0	0
1.5	2	41	0	0	1
1.5	2	42	0	0	1
1.5	2	43	0	0	0
1.5	2	44	0	1	0
1.5	2	45	0	1	1
1.5	2	46	0	0	0
1.5	2	47	0	0	0
1.5	2	48	0	0	1
1.5	2	49	0	0	0
1.5	2	50	0	0	0
1.5	2	51	0	0	0
1.5	2	52	0	0	0
2	2.5	1	0	0	0
2	2.5	2	0	0	1
2	2.5	3	0	0	0
2	2.5	4	0	0	0
2	2.5	5	0	1	0
2	2.5	6	0	0	1
2	2.5	7	0	0	0
2	2.5	8	0	0	0
2	2.5	9	0	1	0
2	2.5	10	0	0	0
2	2.5	11	0	0	1
2	2.5	12	0	1	1
2	2.5	13	0	0	0
2	2.5	14	0	0	0
2	2.5	15	0	0	1
2	2.5	16	0	1	0
2	2.5	17	0	0	1
2	2.5	18	0	0	1
2	2.5	19	0	0	0
2	2.5	20	0	1	0
2	2.5	21	0	0	1
2	2.5	22	0	0	1
2	2.5	23	0	0	1
2	2.5	24	0	0	1
2	2.5	25	0	0	0
2	2.5	26	0	1	1
2	2.5	27	0	1	0
2	2.5	28	0	1	0
2	2.5	29	0	0	0
2	2.5	30	0	0	1
2	2.5	31	0	0	0
2	2.5	32	0	0	1
2	2.5	33	0	0	1
2	2.5	34	0	0	0
2	2.5	35	0	1	0
2	2.5	36	0	1	1
2	2.5	37	0	0	0
2	2.5	38	0	0	0
2	2.5	39	0	0	0
2	2.5	40	0	0	1
2	2.5	41	0	0	1
2	2.5	42	0	0	0
2	2.5	43	0	1	0
2	2.5	44	0	0	1
2	2.5	45	0	0	0
2	2.5	46	0	0	0
2	2.5	47	0	0	1
2	2.5	48	0	0	1
2	2.5	49	0	0	1
2	2.5	50	0	0	0
2	2.5	51	0	0	0
2.5	3	1	0	0	1
2.5	3	2	0	0	1
2.5	3	3	0	0	1
2.5	3	4	0	0	1
2.5	3	5	0	1	0
2.5	3	6	0	0	1
2.5	3	7	0	0	0
2.5	3	8	0	0	0
2.5	3	9	0	1	0
2.5	3	10	0	0	0
2.5	3	11	0	0	1
2.5	3	12	0	1	1
2.5	3	13	0	0	0
2.5	3	14	0	0	1
2.5	3	15	0	0	1
2.5	3	16	0	1	0
2.5	3	17	0	0	1
2.5	3	18	0	0	1
2.5	3	19	0	1	0
2.5	3	20	0	0	0
2.5	3	21	0	1	0
2.5	3	22	0	0	1
2.5	3	23	0	0	0
2.5	3	24	0	0	1
2.5	3	25	0	0	1
2.5	3	26	0	0	0
2.5	3	27	0	1	1
2.5	3	28	0	0	0
2.5	3	29	0	1	1
2.5	3	30	0	0	0
2.5	3	31	0	0	1
2.5	3	32	0	0	0
2.5	3	33	0	0	1
2.5	3	34	0	0	1
2.5	3	35	0	0	0
2.5	3	36	0	1	1
2.5	3	37	0	1	1
2.5	3	38	0	0	1
2.5	3	39	0	0	1
2.5	3	40	0	0	1
2.5	3	41	0	0	1
2.5	3	42	0	0	0
2.5	3	43	0	0	0
2.5	3	44	0	0	0
2.5	3	45	0	0	1
2.5	3	46	0	0	0
2.5	3	47	0	0	1
2.5	3	48	0	0	1
2.5	3	49	0	0	1
2.5	3	50	0	0	1
2.5	3	51	0	0	0
2.5	3	52	0	0	1
3	3.5	1	0	0	1
3	3.5	2	0	0	1
3	3.5	3	0	0	1
3	3.5	4	0	0	1
3	3.5	5	0	1	0
3	3.5	6	0	0	1
3	3.5	7	0	0	0
3	3.5	8	0	0	0
3	3.5	9	1	1	0
3	3.5	10	0	0	1
3	3.5	11	0	0	1
3	3.5	12	0	0	1
3	3.5	13	0	1	0
3	3.5	14	0	0	1
3	3.5	15	0	0	1
3	3.5	16	0	0	0
3	3.5	17	0	0	1
3	3.5	18	0	0	1
3	3.5	19	0	1	0
3	3.5	20	0	0	0
3	3.5	21	0	1	0
3	3.5	22	0	0	1
3	3.5	23	0	1	1
3	3.5	24	0	0	1
3	3.5	25	0	0	1
3	3.5	26	0	0	0
3	3.5	27	0	0	1
3	3.5	28	0	0	0
3	3.5	29	0	1	0
3	3.5	30	0	0	0
3	3.5	31	0	0	1
3	3.5	32	0	0	0
3	3.5	33	0	0	1
3	3.5	34	0	0	1
3	3.5	35	0	0	0
3	3.5	36	0	1	0
3	3.5	37	0	1	1
3	3.5	38	0	0	1
3	3.5	39	0	0	1
3	3.5	40	0	0	1
3	3.5	41	0	0	1
3	3.5	42	0	0	0
3	3.5	43	0	0	1
3	3.5	44	0	0	0
3	3.5	45	0	0	1
3	3.5	46	0	0	0
3	3.5	47	0	0	1
3	3.5	48	0	0	1
3	3.5	49	0	0	1
3	3.5	50	0	0	1
3	3.5	51	0	0	0
3	3.5	52	0	0	1
3.5	4	1	0	0	1
3.5	4	2	0	0	1
3.5	4	3	0	0	0
3.5	4	4	0	0	0
3.5	4	5	0	1	0
3.5	4	6	0	0	1
3.5	4	7	0	0	0
3.5	4	8	0	1	0
3.5	4	9	0	0	0
3.5	4	10	0	0	1
3.5	4	11	0	0	1
3.5	4	12	0	0	1
3.5	4	13	0	1	0
3.5	4	14	0	0	0
3.5	4	15	0	0	1
3.5	4	16	0	0	0
3.5	4	17	0	0	1
3.5	4	18	0	0	1
3.5	4	19	0	1	0
3.5	4	20	0	0	0
3.5	4	21	0	1	0
3.5	4	22	0	0	1
3.5	4	23	0	1	0
3.5	4	24	0	1	1
3.5	4	25	0	0	1
3.5	4	26	0	0	1
3.5	4	27	0	0	0
3.5	4	28	0	0	1
3.5	4	29	0	0	0
3.5	4	30	0	1	0
3.5	4	31	0	0	0
3.5	4	32	0	0	1
3.5	4	33	0	0	1
3.5	4	34	0	0	1
3.5	4	35	0	0	0
3.5	4	36	0	0	0
3.5	4	37	0	0	0
3.5	4	38	0	1	1
3.5	4	39	0	0	0
3.5	4	40	0	0	1
3.5	4	41	0	0	0
3.5	4	42	0	0	1
3.5	4	43	0	0	0
3.5	4	44	0	0	1
3.5	4	45	0	0	0
3.5	4	46	0	0	1
3.5	4	47	0	1	0
3.5	4	48	0	0	0
3.5	4	49	0	0	1
3.5	4	50	0	0	1
3.5	4	51	0	0	0
3.5	4	52	0	0	0
3.5	4	53	0	0	0
4	4.5	1	0	0	1
4	4.5	2	0	0	1
4	4.5	3	0	0	1
4	4.5	4	0	0	0
4	4.5	5	0	1	0
4	4.5	6	0	0	1
4	4.5	7	0	0	0
4	4.5	8	0	1	0
4	4.5	9	0	0	0
4	4.5	10	0	0	0
4	4.5	11	0	0	0
4	4.5	12	0	0	1
4	4.5	13	0	0	1
4	4.5	14	0	0	1
4	4.5	15	0	0	0
4	4.5	16	0	0	1
4	4.5	17	0	0	1
4	4.5	18	0	1	0
4	4.5	19	0	1	0
4	4.5	20	0	0	1
4	4.5	21	0	1	0
4	4.5	22	0	0	0
4	4.5	23	0	0	0
4	4.5	24	0	0	1
4	4.5	25	0	0	0
4	4.5	26	0	0	1
4	4.5	27	0	0	0
4	4.5	28	0	1	0
4	4.5	29	0	0	0
4	4.5	30	0	0	0
4	4.5	31	0	0	1
4	4.5	32	0	0	0
4	4.5	33	0	0	0
4	4.5	34	0	1	0
4	4.5	35	0	0	0
4	4.5	36	0	0	1
4	4.5	37	0	0	1
4	4.5	38	0	0	1
4	4.5	39	0	0	0
4	4.5	40	0	0	1
4	4.5	41	0	0	0
4	4.5	42	0	0	1
4	4.5	43	0	1	0
4	4.5	44	0	0	0
4	4.5	45	0	0	1
4	4.5	46	0	0	1
4	4.5	47	0	0	1
4	4.5	48	0	0	0
4	4.5	49	0	1	0
4.5	5	1	0	0	0
4.5	5	2	0	0	1
4.5	5	3	0	0	1
4.5	5	4	0	0	0
4.5	5	5	0	1	0
4.5	5	6	0	0	1
4.5	5	7	0	0	0
4.5	5	8	0	1	0
4.5	5	9	0	0	1
4.5	5	10	0	0	1
4.5	5	11	0	0	0
4.5	5	12	0	0	1
4.5	5	13	0	1	0
4.5	5	14	0	0	1
4.5	5	15	0	0	1
4.5	5	16	0	0	0
4.5	5	17	0	0	1
4.5	5	18	0	0	1
4.5	5	19	0	1	0
4.5	5	20	0	0	0
4.5	5	21	0	1	0
4.5	5	22	0	0	1
4.5	5	23	0	1	1
4.5	5	24	0	0	0
4.5	5	25	0	0	0
4.5	5	26	0	0	0
4.5	5	27	0	1	0
4.5	5	28	0	0	1
4.5	5	29	0	0	0
4.5	5	30	0	1	0
4.5	5	31	0	0	0
4.5	5	32	0	0	1
4.5	5	33	0	0	0
4.5	5	34	0	0	1
4.5	5	35	0	0	0
4.5	5	36	0	0	1
4.5	5	37	0	0	0
4.5	5	38	0	1	1
4.5	5	39	0	1	0
4.5	5	40	0	0	1
4.5	5	41	0	0	1
4.5	5	42	0	0	0
4.5	5	43	0	0	0
4.5	5	44	0	0	1
4.5	5	45	0	0	0
4.5	5	46	0	0	1
4.5	5	47	0	1	1
4.5	5	48	0	0	0
4.5	5	49	0	0	0
4.5	5	50	0	0	1
4.5	5	51	0	0	1
4.5	5	52	0	0	0
4.5	5	53	0	1	0
5	5.5	1	0	0	1
5	5.5	2	0	0	1
5	5.5	3	0	0	0
5	5.5	4	0	1	1
5	5.5	5	0	1	0
5	5.5	6	0	0	1
5	5.5	7	0	0	0
5	5.5	8	0	1	0
5	5.5	9	0	0	0
5	5.5	10	0	0	1
5	5.5	11	0	0	0
5	5.5	12	0	0	1
5	5.5	13	0	1	0
5	5.5	14	0	0	1
5	5.5	15	0	0	1
5	5.5	16	0	0	0
5	5.5	17	0	0	0
5	5.5	18	0	0	0
5	5.5	19	0	1	0
5	5.5	20	0	0	0
5	5.5	21	0	1	0
5	5.5	22	0	0	1
5	5.5	23	0	1	0
5	5.5	24	0	0	0
5	5.5	25	0	0	1
5	5.5	26	0	0	0
5	5.5	27	0	1	0
5	5.5	28	0	0	1
5	5.5	29	0	1	0
5	5.5	30	0	0	0
5	5.5	31	0	0	1
5	5.5	32	0	0	0
5	5.5	33	0	0	1
5	5.5	34	0	0	0
5	5.5	35	0	0	1
5	5.5	36	0	0	0
5	5.5	37	0	1	1
5	5.5	38	0	1	0
5	5.5	39	0	0	1
5	5.5	40	0	0	0
5	5.5	41	0	0	0
5	5.5	42	0	0	0
5	5.5	43	0	0	1
5	5.5	44	0	0	0
5	5.5	45	0	0	1
5	5.5	46	0	1	0
5	5.5	47	0	0	0
5	5.5	48	0	0	1
5	5.5	49	0	0	1
5	5.5	50	0	0	0
5	5.5	51	0	0	0
5.5	6	1	0	0	1
5.5	6	2	0	0	1
5.5	6	3	0	0	1
5.5	6	4	0	1	1
5.5	6	5	0	1	1
5.5	6	6	0	0	1
5.5	6	7	0	0	0
5.5	6	8	0	1	0
5.5	6	9	0	0	1
5.5	6	10	0	0	0
5.5	6	11	0	0	0
5.5	6	12	0	0	1
5.5	6	13	0	0	0
5.5	6	14	0	0	1
5.5	6	15	0	0	1
5.5	6	16	0	1	0
5.5	6	17	0	0	0
5.5	6	18	0	0	1
5.5	6	19	0	1	0
5.5	6	20	0	0	0
5.5	6	21	0	1	0
5.5	6	22	0	0	1
5.5	6	23	0	0	1
5.5	6	24	0	0	1
5.5	6	25	0	0	1
5.5	6	26	0	1	0
5.5	6	27	0	1	1
5.5	6	28	0	0	1
5.5	6	29	0	1	0
5.5	6	30	0	1	0
5.5	6	31	0	1	0
5.5	6	32	0	0	0
5.5	6	33	0	0	1
5.5	6	34	0	0	0
5.5	6	35	0	0	0
5.5	6	36	0	0	0
5.5	6	37	0	1	0
5.5	6	38	0	0	0
5.5	6	39	0	0	1
5.5	6	40	0	0	0
5.5	6	41	0	0	0
5.5	6	42	0	0	1
5.5	6	43	0	0	0
5.5	6	44	0	0	1
5.5	6	45	0	1	0
5.5	6	46	0	0	0
5.5	6	47	0	0	1
5.5	6	48	0	1	1
5.5	6	49	0	0	1
5.5	6	50	0	0	0
5.5	6	51	0	1	1
6	6.5	1	0	0	1
6	6.5	2	0	0	1
6	6.5	3	0	0	1
6	6.5	4	0	1	0
6	6.5	5	0	0	1
6	6.5	6	0	0	1
6	6.5	7	0	0	0
6	6.5	8	0	1	1
6	6.5	9	0	0	1
6	6.5	10	0	0	0
6	6.5	11	0	0	1
6	6.5	12	0	0	1
6	6.5	13	0	0	0
6	6.5	14	0	0	1
6	6.5	15	0	0	1
6	6.5	16	0	0	0
6	6.5	17	0	0	0
6	6.5	18	0	0	1
6	6.5	19	0	1	0
6	6.5	20	0	0	0
6	6.5	21	0	1	0
6	6.5	22	0	0	1
6	6.5	23	0	0	1
6	6.5	24	0	0	0
6	6.5	25	0	0	1
6	6.5	26	0	1	0
6	6.5	27	0	0	1
6	6.5	28	0	0	1
6	6.5	29	0	1	0
6	6.5	30	0	0	0
6	6.5	31	0	1	0
6	6.5	32	0	0	0
6	6.5	33	0	0	1
6	6.5	34	0	0	1
6	6.5	35	0	1	0
6	6.5	36	0	1	0
6	6.5	37	0	0	0
6	6.5	38	0	0	1
6	6.5	39	0	0	0
6	6.5	40	0	0	1
6	6.5	41	0	1	0
6	6.5	42	0	0	0
6	6.5	43	0	0	1
6	6.5	44	0	0	0
6	6.5	45	0	0	1
6	6.5	46	0	1	0
6	6.5	47	0	0	1
6	6.5	48	0	0	1
6	6.5	49	0	1	1
6	6.5	50	0	0	1
6	6.5	51	0	0	0
6	6.5	52	0	0	1
6.5	7	1	0	0	1
6.5	7	2	0	0	1
6.5	7	3	0	0	1
6.5	7	4	0	0	1
6.5	7	5	0	1	0
6.5	7	6	0	0	1
6.5	7	7	0	0	0
6.5	7	8	0	1	0
6.5	7	9	0	0	1
6.5	7	10	0	0	1
6.5	7	11	0	0	1
6.5	7	12	0	0	1
6.5	7	13	0	0	1
6.5	7	14	0	0	1
6.5	7	15	0	0	0
6.5	7	16	0	0	0
6.5	7	17	0	0	1
6.5	7	18	0	0	0
6.5	7	19	0	0	0
6.5	7	20	0	1	0
6.5	7	21	0	0	1
6.5	7	22	0	0	0
6.5	7	23	0	0	0
6.5	7	24	0	0	1
6.5	7	25	0	0	0
6.5	7	26	0	0	1
6.5	7	27	0	0	1
6.5	7	28	0	1	1
6.5	7	29	0	0	0
6.5	7	30	0	0	1
6.5	7	31	0	0	0
6.5	7	32	0	0	1
6.5	7	33	0	0	1
6.5	7	34	0	1	1
6.5	7	35	0	1	1
6.5	7	36	0	0	1
6.5	7	37	0	0	0
6.5	7	38	0	0	0
6.5	7	39	0	0	0
6.5	7	40	0	1	0
6.5	7	41	0	0	1
6.5	7	42	0	0	1
6.5	7	43	0	0	0
6.5	7	44	0	0	1
6.5	7	45	0	0	0
6.5	7	46	0	0	1
6.5	7	47	0	0	1
6.5	7	48	0	0	0
6.5	7	49	0	1	0
6.5	7	50	0	0	0
7	7.5	1	0	0	1
7	7.5	2	0	0	1
7	7.5	3	0	0	1
7	7.5	4	0	0	0
7	7.5	5	0	1	0
7	7.5	6	0	0	1
7	7.5	7	0	0	1
7	7.5	8	0	1	0
7	7.5	9	0	0	1
7	7.5	10	0	0	0
7	7.5	11	0	0	1
7	7.5	12	0	0	1
7	7.5	13	0	0	0
7	7.5	14	0	0	1
7	7.5	15	0	0	1
7	7.5	16	0	0	0
7	7.5	17	0	1	0
7	7.5	18	0	0	1
7	7.5	19	0	0	0
7	7.5	20	0	0	0
7	7.5	21	0	1	0
7	7.5	22	0	0	1
7	7.5	23	0	0	1
7	7.5	24	0	0	0
7	7.5	25	0	0	1
7	7.5	26	0	0	1
7	7.5	27	0	0	1
7	7.5	28	0	0	1
7	7.5	29	0	0	0
7	7.5	30	0	0	1
7	7.5	31	0	0	1
7	7.5	32	0	0	0
7	7.5	33	0	0	1
7	7.5	34	0	1	1
7	7.5	35	0	1	1
7	7.5	36	0	0	1
7	7.5	37	0	0	1
7	7.5	38	0	0	0
7	7.5	39	0	0	1
7	7.5	40	0	1	0
7	7.5	41	0	0	1
7	7.5	42	0	0	1
7	7.5	43	0	0	0
7	7.5	44	0	0	1
7	7.5	45	0	0	0
7	7.5	46	0	0	1
7	7.5	47	0	0	1
7	7.5	48	0	0	1
7	7.5	49	0	1	0
7	7.5	50	0	1	0
7.5	8	1	0	0	0
7.5	8	2	0	0	1
7.5	8	3	0	0	0
7.5	8	4	0	1	0
7.5	8	5	0	1	0
7.5	8	6	0	0	1
7.5	8	7	0	0	1
7.5	8	8	0	1	0
7.5	8	9	0	0	1
7.5	8	10	0	0	1
7.5	8	11	0	0	1
7.5	8	12	0	0	0
7.5	8	13	0	0	0
7.5	8	14	0	0	1
7.5	8	15	0	0	1
7.5	8	16	0	0	0
7.5	8	17	0	1	0
7.5	8	18	0	0	0
7.5	8	19	0	0	0
7.5	8	20	0	0	0
7.5	8	21	0	1	0
7.5	8	22	0	0	1
7.5	8	23	0	0	1
7.5	8	24	0	0	0
7.5	8	25	0	0	1
7.5	8	26	0	0	1
7.5	8	27	0	0	1
7.5	8	28	0	0	1
7.5	8	29	0	0	0
7.5	8	30	0	0	0
7.5	8	31	0	0	0
7.5	8	32	0	0	1
7.5	8	33	0	0	0
7.5	8	34	0	0	1
7.5	8	35	0	1	0
7.5	8	36	0	1	1
7.5	8	37	0	0	1
7.5	8	38	0	0	1
7.5	8	39	0	0	0
7.5	8	40	0	0	1
7.5	8	41	0	1	0
7.5	8	42	0	0	0
7.5	8	43	0	0	1
7.5	8	44	0	1	0
7.5	8	45	0	0	1
7.5	8	46	0	1	0
7.5	8	47	0	0	1
7.5	8	48	0	0	1
7.5	8	49	0	0	1
7.5	8	50	0	1	0
7.5	8	51	0	1	0
8	8.5	1	0	1	0
8	8.5	2	0	1	1
8	8.5	3	0	0	0
8	8.5	4	0	1	0
8	8.5	5	0	1	0
8	8.5	6	0	0	1
8	8.5	7	0	0	1
8	8.5	8	0	1	0
8	8.5	9	0	0	1
8	8.5	10	0	0	1
8	8.5	11	0	0	1
8	8.5	12	0	0	0
8	8.5	13	0	0	1
8	8.5	14	0	0	1
8	8.5	15	0	0	1
8	8.5	16	0	0	0
8	8.5	17	0	1	0
8	8.5	18	0	0	0
8	8.5	19	0	0	0
8	8.5	20	0	0	0
8	8.5	21	0	0	0
8	8.5	22	0	1	1
8	8.5	23	0	0	0
8	8.5	24	0	0	0
8	8.5	25	0	0	1
8	8.5	26	0	0	1
8	8.5	27	0	0	1
8	8.5	28	0	0	1
8	8.5	29	0	0	0
8	8.5	30	0	1	0
8	8.5	31	0	0	1
8	8.5	32	0	0	1
8	8.5	33	0	0	0
8	8.5	34	0	0	1
8	8.5	35	0	1	0
8	8.5	36	0	1	1
8	8.5	37	0	0	1
8	8.5	38	0	0	1
8	8.5	39	0	1	0
8	8.5	40	0	0	1
8	8.5	41	0	1	1
8	8.5	42	0	0	1
8	8.5	43	0	0	1
8	8.5	44	0	1	0
8	8.5	45	0	0	1
8	8.5	46	0	0	1
8	8.5	47	0	1	0
8	8.5	48	0	0	1
8	8.5	49	0	0	1
8	8.5	50	0	0	0
8	8.5	51	0	0	0
8	8.5	52	0	1	0
8.5	9	1	0	1	0
8.5	9	2	0	1	1
8.5	9	3	0	0	0
8.5	9	4	0	1	0
8.5	9	5	0	1	0
8.5	9	6	0	0	1
8.5	9	7	0	1	0
8.5	9	8	0	0	1
8.5	9	9	0	0	0
8.5	9	10	0	0	1
8.5	9	11	0	0	0
8.5	9	12	0	0	1
8.5	9	13	0	0	1
8.5	9	14	0	0	1
8.5	9	15	0	0	0
8.5	9	16	0	1	0
8.5	9	17	0	1	0
8.5	9	18	0	0	0
8.5	9	19	0	0	0
8.5	9	20	0	0	0
8.5	9	21	0	0	1
8.5	9	22	0	0	0
8.5	9	23	0	0	0
8.5	9	24	0	0	1
8.5	9	25	0	0	1
8.5	9	26	0	0	1
8.5	9	27	0	0	1
8.5	9	28	0	0	0
8.5	9	29	0	1	0
8.5	9	30	0	0	1
8.5	9	31	0	0	1
8.5	9	32	0	0	0
8.5	9	33	0	0	1
8.5	9	34	0	1	1
8.5	9	35	0	0	1
8.5	9	36	0	0	1
8.5	9	37	0	0	1
8.5	9	38	0	1	0
8.5	9	39	0	0	1
8.5	9	40	0	0	0
8.5	9	41	0	0	0
8.5	9	42	0	0	1
8.5	9	43	0	1	0
8.5	9	44	0	0	1
8.5	9	45	0	1	0
8.5	9	46	0	0	0
8.5	9	47	0	0	0
8.5	9	48	0	0	1
8.5	9	49	0	0	0
8.5	9	50	0	1	0
9	9.5	1	0	0	0
9	9.5	2	0	0	1
9	9.5	3	0	0	0
9	9.5	4	0	1	0
9	9.5	5	0	1	0
9	9.5	6	0	0	1
9	9.5	7	0	0	1
9	9.5	8	0	1	0
9	9.5	9	0	0	1
9	9.5	10	0	0	1
9	9.5	11	0	0	1
9	9.5	12	0	1	0
9	9.5	13	0	0	0
9	9.5	14	0	0	1
9	9.5	15	0	0	1
9	9.5	16	0	0	0
9	9.5	17	0	0	1
9	9.5	18	0	1	0
9	9.5	19	0	0	0
9	9.5	20	0	1	0
9	9.5	21	0	0	1
9	9.5	22	0	0	0
9	9.5	23	0	0	0
9	9.5	24	0	0	1
9	9.5	25	0	0	1
9	9.5	26	0	0	1
9	9.5	27	0	0	1
9	9.5	28	0	0	0
9	9.5	29	0	1	0
9	9.5	30	0	1	0
9	9.5	31	0	0	0
9	9.5	32	0	0	1
9	9.5	33	0	0	1
9	9.5	34	0	1	1
9	9.5	35	0	1	1
9	9.5	36	0	0	1
9	9.5	37	0	0	1
9	9.5	38	0	1	1
9	9.5	39	0	0	0
9	9.5	40	0	0	1
9	9.5	41	0	0	0
9	9.5	42	0	0	1
9	9.5	43	0	1	0
9	9.5	44	0	0	1
9	9.5	45	0	0	1
9	9.5	46	0	1	0
9	9.5	47	0	0	0
9	9.5	48	0	0	0
9	9.5	49	0	0	1
9	9.5	50	0	0	1
9	9.5	51	0	1	0
9.5	10	1	0	1	0
9.5	10	2	0	0	1
9.5	10	3	0	1	0
9.5	10	4	0	1	0
9.5	10	5	0	1	0
9.5	10	6	0	0	1
9.5	10	7	0	0	1
9.5	10	8	0	1	0
9.5	10	9	0	0	1
9.5	10	10	0	0	1
9.5	10	11	0	0	1
9.5	10	12	0	1	0
9.5	10	13	0	0	1
9.5	10	14	0	0	1
9.5	10	15	0	0	1
9.5	10	16	0	0	0
9.5	10	17	0	0	1
9.5	10	18	0	1	0
9.5	10	19	0	0	0
9.5	10	20	0	1	0
9.5	10	21	0	0	1
9.5	10	22	0	0	0
9.5	10	23	0	0	0
9.5	10	24	0	0	1
9.5	10	25	0	0	1
9.5	10	26	0	0	1
9.5	10	27	0	0	1
9.5	10	28	0	0	0
9.5	10	29	0	1	0
9.5	10	30	0	1	0
9.5	10	31	0	0	1
9.5	10	32	0	0	1
9.5	10	33	0	0	1
9.5	10	34	0	1	0
9.5	10	35	0	1	1
9.5	10	36	0	0	1
9.5	10	37	0	0	1
9.5	10	38	0	1	1
9.5	10	39	0	0	1
9.5	10	40	0	0	1
9.5	10	41	0	0	0
9.5	10	42	0	0	0
9.5	10	43	0	1	0
9.5	10	44	0	0	1
9.5	10	45	0	0	1
9.5	10	46	0	1	0
9.5	10	47	0	0	0
9.5	10	48	0	1	0
9.5	10	49	0	0	1
9.5	10	50	0	0	1
9.5	10	51	0	1	0
10	10.5	1	0	1	0
10	10.5	2	0	0	1
10	10.5	3	0	1	0
10	10.5	4	0	1	0
10	10.5	5	0	0	0
10	10.5	6	0	0	1
10	10.5	7	0	0	0
10	10.5	8	0	1	0
10	10.5	9	0	0	1
10	10.5	10	0	0	0
10	10.5	11	0	0	1
10	10.5	12	0	1	0
10	10.5	13	0	0	1
10	10.5	14	0	0	1
10	10.5	15	0	1	0
10	10.5	16	0	1	1
10	10.5	17	0	0	1
10	10.5	18	0	0	1
10	10.5	19	0	0	0
10	10.5	20	0	0	0
10	10.5	21	0	0	1
10	10.5	22	0	1	0
10	10.5	23	0	0	0
10	10.5	24	0	0	1
10	10.5	25	0	1	1
10	10.5	26	0	0	1
10	10.5	27	0	0	1
10	10.5	28	0	0	0
10	10.5	29	0	1	1
10	10.5	30	0	0	1
10	10.5	31	0	0	0
10	10.5	32	0	0	0
10	10.5	33	0	0	1
10	10.5	34	0	1	1
10	10.5	35	0	0	1
10	10.5	36	0	0	1
10	10.5	37	0	0	1
10	10.5	38	0	1	0
10	10.5	39	0	0	1
10	10.5	40	0	0	1
10	10.5	41	0	0	0
10	10.5	42	0	0	0
10	10.5	43	0	1	0
10	10.5	44	0	0	1
10	10.5	45	0	0	0
10	10.5	46	0	0	1
10	10.5	47	0	0	1
10	10.5	48	0	1	0
10	10.5	49	0	0	1
10	10.5	50	0	0	1
10	10.5	51	0	1	0
10.5	11	1	0	1	0
10.5	11	2	0	0	1
10.5	11	3	0	1	0
10.5	11	4	0	1	1
10.5	11	5	0	0	0
10.5	11	6	0	0	1
10.5	11	7	0	0	1
10.5	11	8	0	1	0
10.5	11	9	0	0	1
10.5	11	10	0	0	1
10.5	11	11	0	0	1
10.5	11	12	0	1	0
10.5	11	13	0	0	1
10.5	11	14	0	1	0
10.5	11	15	0	1	0
10.5	11	16	0	0	1
10.5	11	17	0	0	1
10.5	11	18	0	0	0
10.5	11	19	0	1	0
10.5	11	20	0	1	0
10.5	11	21	0	0	1
10.5	11	22	0	1	0
10.5	11	23	0	0	0
10.5	11	24	0	0	1
10.5	11	25	0	0	1
10.5	11	26	0	0	1
10.5	11	27	0	0	1
10.5	11	28	0	0	1
10.5	11	29	0	1	1
10.5	11	30	0	1	1
10.5	11	31	0	0	1
10.5	11	32	0	0	0
10.5	11	33	0	0	1
10.5	11	34	0	1	1
10.5	11	35	0	0	1
10.5	11	36	0	0	1
10.5	11	37	0	0	1
10.5	11	38	0	1	1
10.5	11	39	0	1	1
10.5	11	40	0	0	1
10.5	11	41	0	0	1
10.5	11	42	0	0	0
10.5	11	43	0	0	0
10.5	11	44	0	1	0
10.5	11	45	0	0	1
10.5	11	46	0	0	0
10.5	11	47	0	0	0
10.5	11	48	0	0	1
10.5	11	49	0	1	0
10.5	11	50	0	0	1
10.5	11	51	0	0	1
10.5	11	52	0	1	1
11	11.5	1	0	1	0
11	11.5	2	0	0	1
11	11.5	3	0	1	1
11	11.5	4	0	1	0
11	11.5	5	0	0	0
11	11.5	6	0	0	1
11	11.5	7	0	0	1
11	11.5	8	0	1	1
11	11.5	9	0	0	1
11	11.5	10	0	0	1
11	11.5	11	0	0	1
11	11.5	12	0	1	1
11	11.5	13	0	0	0
11	11.5	14	0	0	1
11	11.5	15	0	1	0
11	11.5	16	0	1	0
11	11.5	17	0	0	1
11	11.5	18	0	0	0
11	11.5	19	0	0	0
11	11.5	20	0	1	0
11	11.5	21	0	1	0
11	11.5	22	0	0	1
11	11.5	23	0	1	0
11	11.5	24	0	0	1
11	11.5	25	0	0	1
11	11.5	26	0	0	1
11	11.5	27	0	0	1
11	11.5	28	0	0	1
11	11.5	29	0	0	1
11	11.5	30	0	1	1
11	11.5	31	0	1	0
11	11.5	32	0	0	1
11	11.5	33	0	0	1
11	11.5	34	0	0	1
11	11.5	35	0	1	0
11	11.5	36	0	0	1
11	11.5	37	0	0	1
11	11.5	38	0	1	0
11	11.5	39	0	0	0
11	11.5	40	0	0	1
11	11.5	41	0	0	1
11	11.5	42	0	0	0
11	11.5	43	0	0	1
11	11.5	44	0	1	0
11	11.5	45	0	0	0
11	11.5	46	0	1	0
11	11.5	47	0	0	1
11	11.5	48	0	0	0
11	11.5	49	0	1	1
11	11.5	50	0	0	1
11	11.5	51	0	0	1
11	11.5	52	0	1	1
11.5	12	1	0	1	0
11.5	12	2	0	0	1
11.5	12	3	0	1	1
11.5	12	4	0	1	1
11.5	12	5	0	0	0
11.5	12	6	0	0	1
11.5	12	7	0	0	1
11.5	12	8	0	0	1
11.5	12	9	0	0	0
11.5	12	10	0	0	1
11.5	12	11	0	0	1
11.5	12	12	0	0	1
11.5	12	13	0	0	1
11.5	12	14	0	1	1
11.5	12	15	0	1	0
11.5	12	16	0	0	1
11.5	12	17	0	0	1
11.5	12	18	0	0	0
11.5	12	19	0	0	0
11.5	12	20	0	0	0
11.5	12	21	0	0	1
11.5	12	22	0	1	0
11.5	12	23	0	0	1
11.5	12	24	0	0	1
11.5	12	25	0	0	1
11.5	12	26	0	0	1
11.5	12	27	0	0	1
11.5	12	28	0	0	1
11.5	12	29	0	1	1
11.5	12	30	0	0	1
11.5	12	31	0	0	1
11.5	12	32	0	0	1
11.5	12	33	0	0	1
11.5	12	34	0	0	1
11.5	12	35	0	0	1
11.5	12	36	0	0	1
11.5	12	37	0	1	0
11.5	12	38	0	0	1
11.5	12	39	0	0	1
11.5	12	40	0	0	1
11.5	12	41	0	0	0
11.5	12	42	0	0	1
11.5	12	43	0	1	0
11.5	12	44	0	0	0
11.5	12	45	0	1	0
11.5	12	46	0	0	1
11.5	12	47	0	0	0
11.5	12	48	0	0	1
11.5	12	49	0	0	1
11.5	12	50	0	0	1
11.5	12	51	0	0	0
12	12.5	1	0	1	0
12	12.5	2	0	0	1
12	12.5	3	0	0	1
12	12.5	4	0	1	0
12	12.5	5	0	0	0
12	12.5	6	0	0	1
12	12.5	7	0	0	1
12	12.5	8	0	0	1
12	12.5	9	0	0	1
12	12.5	10	0	0	1
12	12.5	11	0	0	1
12	12.5	12	0	0	1
12	12.5	13	0	0	1
12	12.5	14	0	1	0
12	12.5	15	0	0	1
12	12.5	16	0	0	1
12	12.5	17	0	0	0
12	12.5	18	0	1	1
12	12.5	19	0	0	1
12	12.5	20	0	1	0
12	12.5	21	0	0	1
12	12.5	22	0	0	1
12	12.5	23	0	0	1
12	12.5	24	0	0	1
12	12.5	25	0	0	1
12	12.5	26	0	0	1
12	12.5	27	0	1	1
12	12.5	28	0	0	1
12	12.5	29	0	0	1
12	12.5	30	0	0	0
12	12.5	31	0	0	1
12	12.5	32	0	0	1
12	12.5	33	0	0	1
12	12.5	34	0	0	1
12	12.5	35	0	0	1
12	12.5	36	0	1	0
12	12.5	37	0	0	1
12	12.5	38	0	0	1
12	12.5	39	0	0	0
12	12.5	40	0	0	0
12	12.5	41	0	0	0
12	12.5	42	0	0	1
12	12.5	43	0	1	0
12	12.5	44	0	1	0
12	12.5	45	0	0	1
12	12.5	46	0	1	0
12	12.5	47	0	0	1
12	12.5	48	0	0	1
12	12.5	49	0	0	1
12	12.5	50	0	1	0
12.5	13	1	0	0	1
12.5	13	2	0	0	0
12.5	13	3	0	0	1
12.5	13	4	0	1	0
12.5	13	5	0	0	0
12.5	13	6	0	0	1
12.5	13	7	0	0	1
12.5	13	8	0	0	1
12.5	13	9	0	0	1
12.5	13	10	0	0	1
12.5	13	11	0	0	1
12.5	13	12	0	0	0
12.5	13	13	0	0	1
12.5	13	14	0	0	1
12.5	13	15	0	1	0
12.5	13	16	0	0	1
12.5	13	17	0	0	1
12.5	13	18	0	0	0
12.5	13	19	0	1	0
12.5	13	20	0	0	1
12.5	13	21	0	0	1
12.5	13	22	0	1	1
12.5	13	23	0	0	1
12.5	13	24	0	0	1
12.5	13	25	0	1	0
12.5	13	26	0	0	1
12.5	13	27	0	0	1
12.5	13	28	0	0	1
12.5	13	29	0	0	1
12.5	13	30	0	0	0
12.5	13	31	0	0	1
12.5	13	32	0	0	0
12.5	13	33	0	0	1
12.5	13	34	0	1	0
12.5	13	35	0	0	1
12.5	13	36	0	0	1
12.5	13	37	0	0	1
12.5	13	38	0	1	1
12.5	13	39	0	0	1
12.5	13	40	0	0	1
12.5	13	41	0	0	1
12.5	13	42	0	1	0
12.5	13	43	0	0	1
12.5	13	44	0	1	0
12.5	13	45	0	1	0
12.5	13	46	0	0	1
12.5	13	47	0	1	0
12.5	13	48	0	0	1
12.5	13	49	0	0	1
12.5	13	50	0	0	1
13	13.5	1	0	0	1
13	13.5	2	0	0	1
13	13.5	3	0	0	1
13	13.5	4	0	1	0
13	13.5	5	0	0	1
13	13.5	6	0	0	0
13	13.5	7	0	0	1
13	13.5	8	0	0	1
13	13.5	9	0	0	1
13	13.5	10	0	0	0
13	13.5	11	0	0	1
13	13.5	12	0	0	1
13	13.5	13	0	0	1
13	13.5	14	0	0	0
13	13.5	15	0	0	0
13	13.5	16	0	1	0
13	13.5	17	0	0	1
13	13.5	18	0	0	1
13	13.5	19	0	0	0
13	13.5	20	0	0	0
13	13.5	21	0	0	0
13	13.5	22	0	0	1
13	13.5	23	0	1	0
13	13.5	24	0	0	1
13	13.5	25	0	0	1
13	13.5	26	0	1	0
13	13.5	27	0	0	1
13	13.5	28	0	0	1
13	13.5	29	0	0	1
13	13.5	30	0	0	1
13	13.5	31	0	0	1
13	13.5	32	0	0	1
13	13.5	33	0	0	0
13	13.5	34	0	0	1
13	13.5	35	0	1	0
13	13.5	36	0	0	1
13	13.5	37	0	0	1
13	13.5	38	0	0	1
13	13.5	39	0	1	1
13	13.5	40	0	0	1
13	13.5	41	0	0	1
13	13.5	42	0	0	1
13	13.5	43	0	1	0
13	13.5	44	0	1	0
13	13.5	45	0	0	0
13	13.5	46	0	1	0
13	13.5	47	0	1	0
13	13.5	48	0	0	1
13	13.5	49	0	1	0
13	13.5	50	0	0	1
13	13.5	51	0	0	1
13	13.5	52	0	0	1
13	13.5	53	0	1	0
13.5	14	1	0	0	1
13.5	14	2	0	0	1
13.5	14	3	0	0	1
13.5	14	4	0	1	0
13.5	14	5	0	0	0
13.5	14	6	0	0	0
13.5	14	7	0	0	1
13.5	14	8	0	0	1
13.5	14	9	0	0	1
13.5	14	10	0	0	1
13.5	14	11	0	0	1
13.5	14	12	0	0	1
13.5	14	13	0	1	0
13.5	14	14	0	0	0
13.5	14	15	0	1	0
13.5	14	16	0	0	1
13.5	14	17	0	0	0
13.5	14	18	0	0	0
13.5	14	19	0	0	0
13.5	14	20	0	0	1
13.5	14	21	0	1	0
13.5	14	22	0	0	1
13.5	14	23	0	0	1
13.5	14	24	0	1	1
13.5	14	25	0	0	1
13.5	14	26	0	0	1
13.5	14	27	0	0	1
13.5	14	28	0	0	0
13.5	14	29	0	0	1
13.5	14	30	0	0	1
13.5	14	31	0	0	0
13.5	14	32	0	0	1
13.5	14	33	0	1	1
13.5	14	34	0	0	1
13.5	14	35	0	0	1
13.5	14	36	0	0	1
13.5	14	37	0	0	1
13.5	14	38	0	0	0
13.5	14	39	0	0	1
13.5	14	40	0	0	1
13.5	14	41	0	1	0
13.5	14	42	0	1	0
13.5	14	43	0	0	0
13.5	14	44	0	1	0
13.5	14	45	0	0	0
13.5	14	46	0	0	0
13.5	14	47	0	1	0
13.5	14	48	0	0	1
13.5	14	49	0	0	0
14	14.5	1	0	0	1
14	14.5	2	0	0	1
14	14.5	3	0	0	1
14	14.5	4	0	1	0
14	14.5	5	0	0	0
14	14.5	6	0	0	1
14	14.5	7	0	0	0
14	14.5	8	0	0	1
14	14.5	9	0	0	1
14	14.5	10	0	0	1
14	14.5	11	0	0	0
14	14.5	12	0	0	0
14	14.5	13	0	1	0
14	14.5	14	0	1	0
14	14.5	15	0	1	0
14	14.5	16	0	0	1
14	14.5	17	0	0	1
14	14.5	18	0	0	0
14	14.5	19	0	0	0
14	14.5	20	0	0	1
14	14.5	21	0	1	0
14	14.5	22	0	0	1
14	14.5	23	0	0	1
14	14.5	24	0	0	1
14	14.5	25	0	0	1
14	14.5	26	0	0	0
14	14.5	27	0	0	1
14	14.5	28	0	0	0
14	14.5	29	0	0	0
14	14.5	30	0	0	1
14	14.5	31	0	0	0
14	14.5	32	0	0	1
14	14.5	33	0	1	1
14	14.5	34	0	0	1
14	14.5	35	0	0	1
14	14.5	36	0	0	1
14	14.5	37	0	0	1
14	14.5	38	0	0	1
14	14.5	39	0	0	1
14	14.5	40	0	1	0
14	14.5	41	0	0	0
14	14.5	42	1	1	0
14	14.5	43	0	1	0
14	14.5	44	0	0	0
14	14.5	45	0	1	0
14	14.5	46	0	0	1
14	14.5	47	0	0	1
14	14.5	48	0	0	1
14	14.5	49	0	1	0
14.5	15	1	0	0	1
14.5	15	2	0	0	1
14.5	15	3	0	0	1
14.5	15	4	0	1	0
14.5	15	5	0	1	0
14.5	15	6	0	0	1
14.5	15	7	0	1	0
14.5	15	8	0	0	1
14.5	15	9	0	0	0
14.5	15	10	0	0	1
14.5	15	11	0	1	0
14.5	15	12	0	0	0
14.5	15	13	0	1	0
14.5	15	14	0	1	0
14.5	15	15	0	0	0
14.5	15	16	0	0	1
14.5	15	17	0	0	1
14.5	15	18	0	0	0
14.5	15	19	0	0	1
14.5	15	20	0	0	1
14.5	15	21	0	0	0
14.5	15	22	0	1	0
14.5	15	23	0	0	0
14.5	15	24	0	0	1
14.5	15	25	0	0	1
14.5	15	26	0	0	1
14.5	15	27	0	0	1
14.5	15	28	0	0	1
14.5	15	29	0	0	0
14.5	15	30	0	0	1
14.5	15	31	0	0	1
14.5	15	32	0	0	1
14.5	15	33	0	0	1
14.5	15	34	0	1	1
14.5	15	35	0	0	1
14.5	15	36	0	0	1
14.5	15	37	0	0	1
14.5	15	38	0	0	1
14.5	15	39	0	0	1
14.5	15	40	0	0	1
14.5	15	41	0	0	1
14.5	15	42	0	1	1
14.5	15	43	0	1	0
14.5	15	44	0	0	0
14.5	15	45	0	1	0
14.5	15	46	0	1	0
14.5	15	47	0	1	0
14.5	15	48	0	0	0
14.5	15	49	0	0	1
14.5	15	50	0	0	1
14.5	15	51	0	1	0
15	15.5	1	0	0	1
15	15.5	2	0	0	1
15	15.5	3	0	0	0
15	15.5	4	0	1	0
15	15.5	5	0	0	0
15	15.5	6	0	0	1
15	15.5	7	0	1	0
15	15.5	8	0	0	0
15	15.5	9	0	0	1
15	15.5	10	0	0	1
15	15.5	11	0	1	0
15	15.5	12	0	0	0
15	15.5	13	0	1	1
15	15.5	14	0	1	0
15	15.5	15	0	0	0
15	15.5	16	0	0	1
15	15.5	17	0	0	1
15	15.5	18	0	0	0
15	15.5	19	0	0	1
15	15.5	20	0	0	0
15	15.5	21	0	1	0
15	15.5	22	0	0	1
15	15.5	23	0	0	1
15	15.5	24	0	0	1
15	15.5	25	0	0	1
15	15.5	26	0	0	1
15	15.5	27	0	0	1
15	15.5	28	0	0	1
15	15.5	29	0	1	1
15	15.5	30	0	0	1
15	15.5	31	0	0	1
15	15.5	32	0	0	1
15	15.5	33	0	1	0
15	15.5	34	0	0	1
15	15.5	35	0	0	1
15	15.5	36	0	0	1
15	15.5	37	0	0	1
15	15.5	38	0	0	1
15	15.5	39	0	0	1
15	15.5	40	0	0	1
15	15.5	41	0	1	1
15	15.5	42	0	1	0
15	15.5	43	0	0	0
15	15.5	44	0	0	0
15	15.5	45	0	1	0
15	15.5	46	0	1	0
15	15.5	47	0	0	0
15	15.5	48	0	0	1
15	15.5	49	0	0	0
15	15.5	50	0	0	1
15.5	16	1	0	0	0
15.5	16	2	0	1	1
15.5	16	3	0	0	1
15.5	16	4	0	1	0
15.5	16	5	0	1	0
15.5	16	6	0	0	1
15.5	16	7	0	0	1
15.5	16	8	0	1	0
15.5	16	9	0	0	1
15.5	16	10	0	0	1
15.5	16	11	0	0	1
15.5	16	12	0	1	0
15.5	16	13	0	0	0
15.5	16	14	0	1	1
15.5	16	15	0	1	0
15.5	16	16	0	0	0
15.5	16	17	0	0	1
15.5	16	18	0	0	1
15.5	16	19	0	1	0
15.5	16	20	0	0	0
15.5	16	21	0	1	0
15.5	16	22	0	0	0
15.5	16	23	0	0	0
15.5	16	24	0	0	1
15.5	16	25	0	0	1
15.5	16	26	0	0	1
15.5	16	27	0	0	1
15.5	16	28	0	0	1
15.5	16	29	0	1	1
15.5	16	30	0	1	0
15.5	16	31	0	0	1
15.5	16	32	0	0	0
15.5	16	33	0	0	1
15.5	16	34	0	1	0
15.5	16	35	0	0	1
15.5	16	36	0	0	1
15.5	16	37	0	0	1
15.5	16	38	0	0	1
15.5	16	39	0	0	1
15.5	16	40	0	0	1
15.5	16	41	0	0	0
15.5	16	42	0	1	0
15.5	16	43	0	1	0
15.5	16	44	0	0	0
15.5	16	45	0	1	0
15.5	16	46	0	1	0
15.5	16	47	0	0	0
15.5	16	48	0	0	1
15.5	16	49	0	0	1
15.5	16	50	0	0	1
16	16.5	1	0	1	0
16	16.5	2	0	1	0
16	16.5	3	0	0	0
16	16.5	4	0	1	0
16	16.5	5	0	1	0
16	16.5	6	0	0	1
16	16.5	7	0	0	0
16	16.5	8	0	1	0
16	16.5	9	0	0	1
16	16.5	10	0	0	0
16	16.5	11	0	0	1
16	16.5	12	0	1	0
16	16.5	13	0	0	0
16	16.5	14	0	1	0
16	16.5	15	1	1	0
16	16.5	16	0	1	0
16	16.5	17	0	0	1
16	16.5	18	0	0	0
16	16.5	19	0	1	0
16	16.5	20	0	0	1
16	16.5	21	0	0	0
16	16.5	22	0	1	0
16	16.5	23	0	0	0
16	16.5	24	0	0	0
16	16.5	25	0	0	1
16	16.5	26	0	0	1
16	16.5	27	0	1	0
16	16.5	28	0	0	0
16	16.5	29	0	1	0
16	16.5	30	0	0	1
16	16.5	31	0	0	1
16	16.5	32	0	0	0
16	16.5	33	0	0	1
16	16.5	34	0	1	0
16	16.5	35	0	0	1
16	16.5	36	0	0	1
16	16.5	37	0	0	0
16	16.5	38	0	0	0
16	16.5	39	0	0	0
16	16.5	40	0	1	0
16	16.5	41	0	1	1
16	16.5	42	0	1	0
16	16.5	43	0	0	1
16	16.5	44	0	1	0
16	16.5	45	0	1	0
16	16.5	46	0	0	0
16	16.5	47	0	0	1
16	16.5	48	0	0	1
16	16.5	49	0	0	0
16.5	17	1	1	1	0
16.5	17	2	0	1	1
16.5	17	3	0	0	0
16.5	17	4	0	1	0
16.5	17	5	0	1	0
16.5	17	6	0	0	1
16.5	17	7	0	0	0
16.5	17	8	0	1	1
16.5	17	9	0	0	1
16.5	17	10	0	0	0
16.5	17	11	0	0	1
16.5	17	12	0	0	1
16.5	17	13	0	0	1
16.5	17	14	0	0	0
16.5	17	15	0	1	0
16.5	17	16	0	1	0
16.5	17	17	0	0	1
16.5	17	18	0	0	0
16.5	17	19	0	0	0
16.5	17	20	0	0	0
16.5	17	21	0	0	0
16.5	17	22	0	1	0
16.5	17	23	0	1	0
16.5	17	24	0	0	0
16.5	17	25	0	0	1
16.5	17	26	0	1	0
16.5	17	27	0	1	0
16.5	17	28	0	0	0
16.5	17	29	0	1	0
16.5	17	30	0	0	0
16.5	17	31	0	0	1
16.5	17	32	0	0	0
16.5	17	33	0	0	1
16.5	17	34	0	1	0
16.5	17	35	0	0	1
16.5	17	36	0	0	1
16.5	17	37	0	0	0
16.5	17	38	0	0	1
16.5	17	39	0	0	0
16.5	17	40	0	0	1
16.5	17	41	0	0	0
16.5	17	42	0	1	0
16.5	17	43	0	1	0
16.5	17	44	0	1	0
16.5	17	45	0	0	1
16.5	17	46	1	1	0
16.5	17	47	0	1	0
16.5	17	48	0	1	0
16.5	17	49	0	0	1
16.5	17	50	0	0	0
16.5	17	51	0	0	0
16.5	17	52	0	1	1
17	17.5	1	0	1	0
17	17.5	2	0	1	1
17	17.5	3	0	0	1
17	17.5	4	0	1	0
17	17.5	5	0	1	0
17	17.5	6	0	0	1
17	17.5	7	0	0	1
17	17.5	8	0	0	1
17	17.5	9	0	0	1
17	17.5	10	0	1	0
17	17.5	11	0	0	1
17	17.5	12	0	0	1
17	17.5	13	0	0	1
17	17.5	14	0	1	0
17	17.5	15	0	0	0
17	17.5	16	0	1	0
17	17.5	17	0	0	1
17	17.5	18	0	1	0
17	17.5	19	0	0	0
17	17.5	20	0	1	0
17	17.5	21	0	1	0
17	17.5	22	0	1	0
17	17.5	23	0	0	0
17	17.5	24	0	0	1
17	17.5	25	0	1	0
17	17.5	26	0	1	0
17	17.5	27	0	1	1
17	17.5	28	0	0	0
17	17.5	29	0	1	0
17	17.5	30	0	0	1
17	17.5	31	0	0	0
17	17.5	32	0	0	1
17	17.5	33	0	0	0
17	17.5	34	0	1	0
17	17.5	35	0	0	1
17	17.5	36	0	0	1
17	17.5	37	0	0	0
17	17.5	38	0	0	1
17	17.5	39	0	1	0
17	17.5	40	0	1	0
17	17.5	41	0	0	0
17	17.5	42	0	1	0
17	17.5	43	0	0	1
17	17.5	44	0	1	0
17	17.5	45	0	1	0
17	17.5	46	0	1	0
17	17.5	47	0	0	1
17	17.5	48	0	0	0
17	17.5	49	0	0	0
17.5	18	1	0	1	0
17.5	18	2	0	1	1
17.5	18	3	0	0	1
17.5	18	4	0	1	1
17.5	18	5	0	1	0
17.5	18	6	0	0	1
17.5	18	7	0	0	1
17.5	18	8	0	0	0
17.5	18	9	0	0	0
17.5	18	10	0	1	0
17.5	18	11	0	0	1
17.5	18	12	0	0	0
17.5	18	13	0	0	1
17.5	18	14	0	1	0
17.5	18	15	0	1	0
17.5	18	16	0	1	0
17.5	18	17	0	0	1
17.5	18	18	0	1	0
17.5	18	19	0	0	0
17.5	18	20	0	0	0
17.5	18	21	0	1	0
17.5	18	22	0	1	0
17.5	18	23	0	1	0
17.5	18	24	0	1	1
17.5	18	25	0	0	0
17.5	18	26	0	1	1
17.5	18	27	0	1	1
17.5	18	28	0	1	1
17.5	18	29	0	0	0
17.5	18	30	0	1	0
17.5	18	31	0	0	1
17.5	18	32	0	0	0
17.5	18	33	0	0	1
17.5	18	34	0	0	0
17.5	18	35	0	1	0
17.5	18	36	0	0	1
17.5	18	37	0	0	1
17.5	18	38	0	1	0
17.5	18	39	0	0	0
17.5	18	40	0	1	0
17.5	18	41	0	1	0
17.5	18	42	0	0	0
17.5	18	43	0	1	0
17.5	18	44	0	0	0
17.5	18	45	0	1	0
17.5	18	46	0	0	1
17.5	18	47	0	1	0
17.5	18	48	0	0	1
17.5	18	49	0	1	0
17.5	18	50	0	0	1
18	18.5	1	0	1	0
18	18.5	2	0	0	1
18	18.5	3	0	0	0
18	18.5	4	0	1	1
18	18.5	5	0	1	0
18	18.5	6	0	0	1
18	18.5	7	0	1	0
18	18.5	8	0	0	1
18	18.5	9	0	1	0
18	18.5	10	0	0	1
18	18.5	11	0	1	0
18	18.5	12	0	0	1
18	18.5	13	0	1	0
18	18.5	14	0	1	0
18	18.5	15	0	1	0
18	18.5	16	0	0	1
18	18.5	17	0	1	0
18	18.5	18	0	0	0
18	18.5	19	0	0	0
18	18.5	20	0	1	0
18	18.5	21	0	0	0
18	18.5	22	0	1	0
18	18.5	23	0	1	1
18	18.5	24	0	0	0
18	18.5	25	0	1	1
18	18.5	26	0	1	1
18	18.5	27	0	0	1
18	18.5	28	0	0	1
18	18.5	29	0	1	0
18	18.5	30	0	0	0
18	18.5	31	0	1	0
18	18.5	32	0	0	0
18	18.5	33	0	0	1
18	18.5	34	0	1	0
18	18.5	35	0	0	1
18	18.5	36	0	0	1
18	18.5	37	0	0	1
18	18.5	38	0	1	0
18	18.5	39	0	0	1
18	18.5	40	0	1	0
18	18.5	41	0	1	0
18	18.5	42	0	0	0
18	18.5	43	0	1	0
18	18.5	44	0	0	0
18	18.5	45	0	0	0
18	18.5	46	0	0	1
18	18.5	47	0	1	0
18	18.5	48	0	0	1
18	18.5	49	0	1	0
18	18.5	50	0	0	1
18	18.5	51	0	0	1
18.5	19	1	0	0	0
18.5	19	2	0	0	1
18.5	19	3	0	0	1
18.5	19	4	0	0	1
18.5	19	5	0	1	0
18.5	19	6	0	0	1
18.5	19	7	0	0	0
18.5	19	8	0	1	0
18.5	19	9	0	0	1
18.5	19	10	0	1	0
18.5	19	11	0	0	1
18.5	19	12	0	1	0
18.5	19	13	0	0	1
18.5	19	14	0	1	0
18.5	19	15	0	1	0
18.5	19	16	0	1	0
18.5	19	17	0	0	1
18.5	19	18	0	1	1
18.5	19	19	0	0	1
18.5	19	20	0	0	1
18.5	19	21	0	1	0
18.5	19	22	0	0	1
18.5	19	23	0	1	0
18.5	19	24	0	1	1
18.5	19	25	0	0	0
18.5	19	26	0	0	0
18.5	19	27	0	0	1
18.5	19	28	0	0	1
18.5	19	29	0	0	1
18.5	19	30	0	1	0
18.5	19	31	0	0	1
18.5	19	32	0	1	1
18.5	19	33	0	0	0
18.5	19	34	0	0	1
18.5	19	35	0	1	0
18.5	19	36	0	0	1
18.5	19	37	0	0	1
18.5	19	38	0	0	1
18.5	19	39	0	0	0
18.5	19	40	0	0	1
18.5	19	41	0	0	0
18.5	19	42	0	1	0
18.5	19	43	0	0	0
18.5	19	44	0	1	0
18.5	19	45	0	1	0
18.5	19	46	0	0	1
18.5	19	47	0	0	0
18.5	19	48	0	0	1
18.5	19	49	0	0	1
18.5	19	50	0	1	0
18.5	19	51	0	0	1
18.5	19	52	0	0	0
19	19.5	1	0	0	0
19	19.5	2	0	1	1
19	19.5	3	0	0	1
19	19.5	4	0	0	1
19	19.5	5	0	1	1
19	19.5	6	0	0	1
19	19.5	7	0	0	0
19	19.5	8	0	1	0
19	19.5	9	0	0	0
19	19.5	10	0	1	0
19	19.5	11	0	0	1
19	19.5	12	0	1	0
19	19.5	13	0	1	0
19	19.5	14	0	1	0
19	19.5	15	0	1	1
19	19.5	16	0	0	1
19	19.5	17	0	1	1
19	19.5	18	0	0	1
19	19.5	19	0	1	0
19	19.5	20	0	0	1
19	19.5	21	0	1	0
19	19.5	22	0	1	1
19	19.5	23	0	0	1
19	19.5	24	0	0	1
19	19.5	25	0	0	1
19	19.5	26	0	0	1
19	19.5	27	0	0	0
19	19.5	28	0	1	0
19	19.5	29	0	0	1
19	19.5	30	0	0	0
19	19.5	31	0	0	1
19	19.5	32	0	0	1
19	19.5	33	0	0	0
19	19.5	34	0	0	1
19	19.5	35	0	0	1
19	19.5	36	0	0	1
19	19.5	37	0	0	1
19	19.5	38	0	0	1
19	19.5	39	0	0	1
19	19.5	40	0	1	0
19	19.5	41	0	0	1
19	19.5	42	0	1	1
19	19.5	43	0	1	0
19	19.5	44	0	0	1
19	19.5	45	0	0	1
19	19.5	46	0	0	1
19	19.5	47	0	1	1
19	19.5	48	0	0	1
19.5	20	1	0	0	1
19.5	20	2	0	1	1
19.5	20	3	0	0	1
19.5	20	4	0	0	1
19.5	20	5	0	0	1
19.5	20	6	0	0	1
19.5	20	7	0	1	1
19.5	20	8	0	0	0
19.5	20	9	0	1	0
19.5	20	10	0	0	1
19.5	20	11	0	1	0
[truncated: 3,908 more rows]

## Sheet: 69F06>dTrpA1-data
timeBinStart	timeBinStop	larva	boolRoll	boolBend	boolCrawl
0	0.5	1	0	0	0
0	0.5	2	0	0	0
0	0.5	3	0	0	0
0	0.5	4	0	0	0
0	0.5	5	0	1	0
0	0.5	6	0	0	0
0	0.5	7	0	0	0
0	0.5	8	0	1	0
0	0.5	9	0	0	0
0	0.5	10	0	0	0
0	0.5	11	0	0	0
0	0.5	12	0	0	0
0	0.5	13	0	1	0
0	0.5	14	0	1	0
0	0.5	15	0	1	0
0	0.5	16	0	0	0
0	0.5	17	0	1	0
0	0.5	18	0	0	0
0	0.5	19	0	1	0
0	0.5	20	0	0	0
0	0.5	21	0	0	0
0	0.5	22	0	0	0
0	0.5	23	0	0	0
0	0.5	24	0	0	0
0	0.5	25	0	0	0
0	0.5	26	0	0	0
0	0.5	27	0	0	0
0	0.5	28	0	0	0
0	0.5	29	0	0	0
0	0.5	30	0	0	0
0	0.5	31	0	0	0
0	0.5	32	0	0	0
0	0.5	33	0	0	0
0	0.5	34	0	0	0
0	0.5	35	0	0	0
0	0.5	36	0	0	0
0	0.5	37	0	0	0
0	0.5	38	0	0	0
0	0.5	39	0	0	0
0	0.5	40	0	0	0
0.5	1	1	0	0	0
0.5	1	2	0	0	1
0.5	1	3	0	0	0
0.5	1	4	0	0	1
0.5	1	5	0	1	0
0.5	1	6	0	0	1
0.5	1	7	0	1	0
0.5	1	8	0	1	0
0.5	1	9	0	0	0
0.5	1	10	0	0	0
0.5	1	11	0	0	0
0.5	1	12	0	1	0
0.5	1	13	0	1	0
0.5	1	14	0	1	0
0.5	1	15	0	1	0
0.5	1	16	0	0	0
0.5	1	17	0	1	0
0.5	1	18	0	0	0
0.5	1	19	0	1	0
0.5	1	20	0	0	0
0.5	1	21	0	0	0
0.5	1	22	0	0	1
0.5	1	23	0	0	1
0.5	1	24	0	1	0
0.5	1	25	0	0	1
0.5	1	26	0	1	0
0.5	1	27	0	0	0
0.5	1	28	0	0	0
0.5	1	29	0	0	1
0.5	1	30	0	0	0
0.5	1	31	0	0	1
0.5	1	32	0	0	0
0.5	1	33	0	0	0
0.5	1	34	0	0	0
0.5	1	35	0	0	1
0.5	1	36	0	0	1
0.5	1	37	0	0	0
0.5	1	38	0	0	1
0.5	1	39	0	0	0
1	1.5	1	0	0	0
1	1.5	2	0	0	1
1	1.5	3	0	0	0
1	1.5	4	0	0	1
1	1.5	5	0	0	0
1	1.5	6	0	0	1
1	1.5	7	0	1	0
1	1.5	8	0	0	1
1	1.5	9	0	0	0
1	1.5	10	0	0	0
1	1.5	11	0	0	0
1	1.5	12	0	0	0
1	1.5	13	0	0	0
1	1.5	14	0	0	0
1	1.5	15	0	0	0
1	1.5	16	0	0	0
1	1.5	17	0	0	0
1	1.5	18	0	0	0
1	1.5	19	0	0	1
1	1.5	20	0	0	0
1	1.5	21	0	0	0
1	1.5	22	0	0	1
1	1.5	23	0	0	1
1	1.5	24	0	1	0
1	1.5	25	0	0	1
1	1.5	26	0	1	0
1	1.5	27	0	0	0
1	1.5	28	0	0	0
1	1.5	29	0	0	1
1	1.5	30	0	0	0
1	1.5	31	0	0	1
1	1.5	32	0	0	1
1	1.5	33	0	0	1
1	1.5	34	0	0	0
1	1.5	35	0	1	1
1	1.5	36	0	0	1
1	1.5	37	0	0	0
1	1.5	38	0	0	0
1	1.5	39	0	0	1
1	1.5	40	0	0	0
1.5	2	1	0	0	0
1.5	2	2	0	0	1
1.5	2	3	0	0	0
1.5	2	4	0	0	1
1.5	2	5	0	1	0
1.5	2	6	0	0	1
1.5	2	7	0	0	0
1.5	2	8	0	0	1
1.5	2	9	0	0	0
1.5	2	10	0	1	0
1.5	2	11	0	0	0
1.5	2	12	0	0	0
1.5	2	13	0	1	0
1.5	2	14	0	0	0
1.5	2	15	0	0	0
1.5	2	16	0	0	1
1.5	2	17	0	0	0
1.5	2	18	0	0	1
1.5	2	19	0	0	1
1.5	2	20	0	0	0
1.5	2	21	0	0	1
1.5	2	22	0	0	1
1.5	2	23	0	1	0
1.5	2	24	0	0	1
1.5	2	25	0	0	1
1.5	2	26	0	0	1
1.5	2	27	0	0	0
1.5	2	28	0	0	1
1.5	2	29	0	0	0
1.5	2	30	0	0	1
1.5	2	31	0	0	1
1.5	2	32	0	0	1
1.5	2	33	0	0	0
1.5	2	34	0	1	1
1.5	2	35	0	0	1
1.5	2	36	0	0	0
1.5	2	37	0	1	0
1.5	2	38	0	0	1
1.5	2	39	0	0	0
2	2.5	1	0	1	1
2	2.5	2	0	0	1
2	2.5	3	0	1	1
2	2.5	4	0	0	1
2	2.5	5	0	1	0
2	2.5	6	0	1	1
2	2.5	7	0	0	1
2	2.5	8	0	0	1
2	2.5	9	0	0	1
2	2.5	10	0	1	0
2	2.5	11	0	0	0
2	2.5	12	0	0	1
2	2.5	13	0	1	0
2	2.5	14	0	1	0
2	2.5	15	0	0	1
2	2.5	16	0	0	1
2	2.5	17	0	1	1
2	2.5	18	0	0	1
2	2.5	19	0	0	0
2	2.5	20	0	0	1
2	2.5	21	0	0	1
2	2.5	22	0	0	1
2	2.5	23	0	0	1
2	2.5	24	0	1	0
2	2.5	25	0	0	1
2	2.5	26	0	0	1
2	2.5	27	0	0	1
2	2.5	28	0	0	1
2	2.5	29	0	0	1
2	2.5	30	0	0	1
2	2.5	31	0	1	1
2	2.5	32	0	0	1
2	2.5	33	0	0	1
2	2.5	34	0	0	1
2	2.5	35	0	0	1
2	2.5	36	0	0	1
2	2.5	37	0	0	1
2	2.5	38	0	1	0
2	2.5	39	0	0	1
2	2.5	40	0	0	0
2.5	3	1	0	1	1
2.5	3	2	0	0	1
2.5	3	3	0	0	1
2.5	3	4	0	0	1
2.5	3	5	0	0	1
2.5	3	6	0	1	1
2.5	3	7	0	0	1
2.5	3	8	0	0	1
2.5	3	9	0	1	1
2.5	3	10	0	1	0
2.5	3	11	0	0	0
2.5	3	12	0	1	1
2.5	3	13	0	1	0
2.5	3	14	0	1	1
2.5	3	15	0	0	1
2.5	3	16	0	1	1
2.5	3	17	0	1	1
2.5	3	18	0	0	1
2.5	3	19	0	0	0
2.5	3	20	0	0	1
2.5	3	21	0	0	1
2.5	3	22	0	0	1
2.5	3	23	0	0	1
2.5	3	24	0	0	0
2.5	3	25	0	0	1
2.5	3	26	0	0	1
2.5	3	27	0	0	1
2.5	3	28	0	0	1
2.5	3	29	0	0	1
2.5	3	30	0	0	1
2.5	3	31	0	1	1
2.5	3	32	0	0	1
2.5	3	33	0	0	1
2.5	3	34	0	0	1
2.5	3	35	0	0	1
2.5	3	36	0	0	1
2.5	3	37	0	0	1
2.5	3	38	0	1	1
2.5	3	39	0	0	1
2.5	3	40	0	0	0
3	3.5	1	0	0	1
3	3.5	2	0	0	1
3	3.5	3	0	0	1
3	3.5	4	0	1	1
3	3.5	5	0	0	1
3	3.5	6	0	0	1
3	3.5	7	0	0	1
3	3.5	8	0	0	1
3	3.5	9	0	1	0
3	3.5	10	0	0	1
3	3.5	11	0	0	0
3	3.5	12	0	1	1
3	3.5	13	0	1	0
3	3.5	14	0	0	1
3	3.5	15	0	0	1
3	3.5	16	0	1	1
3	3.5	17	0	1	0
3	3.5	18	0	1	0
3	3.5	19	0	0	1
3	3.5	20	0	0	1
3	3.5	21	0	0	1
3	3.5	22	0	0	1
3	3.5	23	0	0	1
3	3.5	24	0	0	0
3	3.5	25	0	1	1
3	3.5	26	0	0	1
3	3.5	27	0	0	1
3	3.5	28	0	0	1
3	3.5	29	0	0	1
3	3.5	30	0	0	0
3	3.5	31	0	0	1
3	3.5	32	0	0	1
3	3.5	33	0	0	1
3	3.5	34	0	0	1
3	3.5	35	0	0	1
3	3.5	36	0	0	1
3	3.5	37	0	0	1
3	3.5	38	0	0	1
3	3.5	39	0	0	1
3	3.5	40	0	1	0
3.5	4	1	0	0	1
3.5	4	2	0	0	1
3.5	4	3	0	0	1
3.5	4	4	0	1	1
3.5	4	5	0	0	1
3.5	4	6	0	0	1
3.5	4	7	0	1	0
3.5	4	8	0	0	1
3.5	4	9	0	1	1
3.5	4	10	0	0	1
3.5	4	11	0	0	0
3.5	4	12	0	0	1
3.5	4	13	0	1	0
3.5	4	14	0	1	0
3.5	4	15	0	0	1
3.5	4	16	0	1	1
3.5	4	17	0	1	1
3.5	4	18	0	1	1
3.5	4	19	0	0	1
3.5	4	20	0	1	1
3.5	4	21	0	0	1
3.5	4	22	0	0	1
3.5	4	23	0	1	1
3.5	4	24	0	1	0
3.5	4	25	0	1	1
3.5	4	26	0	0	1
3.5	4	27	0	0	1
3.5	4	28	0	0	1
3.5	4	29	0	1	1
3.5	4	30	0	1	0
3.5	4	31	0	0	1
3.5	4	32	0	0	1
3.5	4	33	0	0	1
3.5	4	34	0	0	1
3.5	4	35	0	0	0
3.5	4	36	0	0	1
3.5	4	37	0	0	1
3.5	4	38	0	0	1
3.5	4	39	0	0	1
3.5	4	40	0	1	0
4	4.5	1	0	0	1
4	4.5	2	0	0	1
4	4.5	3	0	0	1
4	4.5	4	0	0	1
4	4.5	5	0	0	1
4	4.5	6	0	0	1
4	4.5	7	0	0	1
4	4.5	8	0	1	0
4	4.5	9	0	0	1
4	4.5	10	0	0	1
4	4.5	11	0	1	1
4	4.5	12	0	0	0
4	4.5	13	0	0	1
4	4.5	14	0	1	1
4	4.5	15	1	1	0
4	4.5	16	0	0	1
4	4.5	17	0	0	1
4	4.5	18	0	0	1
4	4.5	19	0	1	1
4	4.5	20	0	0	1
4	4.5	21	0	0	1
4	4.5	22	0	1	1
4	4.5	23	0	0	1
4	4.5	24	0	0	1
4	4.5	25	0	1	0
4	4.5	26	0	0	1
4	4.5	27	0	0	1
4	4.5	28	0	1	1
4	4.5	29	0	0	1
4	4.5	30	0	1	1
4	4.5	31	0	1	0
4	4.5	32	0	0	1
4	4.5	33	0	0	1
4	4.5	34	0	0	1
4	4.5	35	0	0	1
4	4.5	36	0	0	0
4	4.5	37	0	0	1
4	4.5	38	0	0	1
4	4.5	39	0	0	1
4	4.5	40	0	0	1
4	4.5	41	0	1	0
4.5	5	1	0	0	1
4.5	5	2	0	0	1
4.5	5	3	0	0	1
4.5	5	4	0	0	1
4.5	5	5	0	0	1
4.5	5	6	0	0	1
4.5	5	7	0	0	0
4.5	5	8	0	0	1
4.5	5	9	0	1	1
4.5	5	10	0	1	1
4.5	5	11	0	1	0
4.5	5	12	0	0	1
4.5	5	13	0	1	1
4.5	5	14	0	1	0
4.5	5	15	0	1	0
4.5	5	16	0	0	1
4.5	5	17	0	0	1
4.5	5	18	0	0	1
4.5	5	19	0	0	1
4.5	5	20	0	0	1
4.5	5	21	0	1	1
4.5	5	22	0	0	1
4.5	5	23	0	0	1
4.5	5	24	0	1	0
4.5	5	25	0	0	1
4.5	5	26	0	0	1
4.5	5	27	0	0	1
4.5	5	28	0	0	1
4.5	5	29	0	0	1
4.5	5	30	0	1	0
4.5	5	31	0	0	1
4.5	5	32	0	0	1
4.5	5	33	0	0	1
4.5	5	34	0	0	1
4.5	5	35	0	1	0
4.5	5	36	0	0	1
4.5	5	37	0	0	1
4.5	5	38	0	0	1
4.5	5	39	0	0	1
4.5	5	40	0	0	1
5	5.5	1	0	0	1
5	5.5	2	0	0	1
5	5.5	3	0	0	1
5	5.5	4	0	0	1
5	5.5	5	0	0	1
5	5.5	6	0	1	0
5	5.5	7	0	0	0
5	5.5	8	0	0	1
5	5.5	9	0	1	1
5	5.5	10	0	0	1
5	5.5	11	0	1	0
5	5.5	12	0	0	1
5	5.5	13	0	1	1
5	5.5	14	0	0	0
5	5.5	15	0	1	0
5	5.5	16	0	0	1
5	5.5	17	0	1	0
5	5.5	18	0	0	1
5	5.5	19	0	0	1
5	5.5	20	0	0	1
5	5.5	21	0	0	1
5	5.5	22	0	0	1
5	5.5	23	0	0	1
5	5.5	24	0	1	0
5	5.5	25	0	0	1
5	5.5	26	0	0	1
5	5.5	27	0	0	1
5	5.5	28	0	0	1
5	5.5	29	0	0	1
5	5.5	30	0	1	0
5	5.5	31	0	0	1
5	5.5	32	0	0	1
5	5.5	33	0	0	1
5	5.5	34	0	0	1
5	5.5	35	0	1	0
5	5.5	36	0	0	1
5	5.5	37	0	0	1
5	5.5	38	0	1	0
5	5.5	39	0	0	1
5	5.5	40	0	0	1
5.5	6	1	0	0	1
5.5	6	2	0	1	1
5.5	6	3	0	0	1
5.5	6	4	0	0	1
5.5	6	5	0	1	1
5.5	6	6	0	0	0
5.5	6	7	0	1	0
5.5	6	8	0	1	0
5.5	6	9	0	0	1
5.5	6	10	0	1	1
5.5	6	11	0	0	1
5.5	6	12	0	0	0
5.5	6	13	0	0	1
5.5	6	14	0	0	1
5.5	6	15	0	0	1
5.5	6	16	0	0	1
5.5	6	17	0	1	1
5.5	6	18	0	0	1
5.5	6	19	0	0	1
5.5	6	20	0	0	1
5.5	6	21	0	0	1
5.5	6	22	0	0	1
5.5	6	23	0	0	1
5.5	6	24	0	1	0
5.5	6	25	0	0	1
5.5	6	26	0	0	1
5.5	6	27	0	0	1
5.5	6	28	0	0	1
5.5	6	29	0	0	1
5.5	6	30	0	1	0
5.5	6	31	0	1	0
5.5	6	32	0	0	1
5.5	6	33	0	0	1
5.5	6	34	0	0	1
5.5	6	35	0	1	1
5.5	6	36	0	0	1
5.5	6	37	0	0	1
5.5	6	38	0	1	0
5.5	6	39	0	0	1
5.5	6	40	0	1	1
6	6.5	1	0	0	1
6	6.5	2	0	1	1
6	6.5	3	0	0	1
6	6.5	4	0	1	1
6	6.5	5	0	1	1
6	6.5	6	0	1	1
6	6.5	7	0	1	0
6	6.5	8	0	0	1
6	6.5	9	0	1	1
6	6.5	10	0	0	1
6	6.5	11	0	0	1
6	6.5	12	0	0	1
6	6.5	13	0	1	0
6	6.5	14	0	1	1
6	6.5	15	0	0	1
6	6.5	16	0	1	0
6	6.5	17	0	1	1
6	6.5	18	0	0	1
6	6.5	19	0	0	1
6	6.5	20	0	0	1
6	6.5	21	0	1	1
6	6.5	22	0	0	1
6	6.5	23	0	0	1
6	6.5	24	0	1	0
6	6.5	25	0	0	1
6	6.5	26	0	0	1
6	6.5	27	0	0	1
6	6.5	28	0	0	1
6	6.5	29	0	0	1
6	6.5	30	0	0	0
6	6.5	31	0	1	0
6	6.5	32	0	0	1
6	6.5	33	0	0	0
6	6.5	34	0	0	1
6	6.5	35	0	1	1
6	6.5	36	0	0	1
6	6.5	37	0	0	1
6	6.5	38	0	1	0
6	6.5	39	0	0	1
6	6.5	40	0	0	1
6.5	7	1	0	0	1
6.5	7	2	0	0	1
6.5	7	3	0	0	1
6.5	7	4	0	1	1
6.5	7	5	0	0	1
6.5	7	6	0	0	0
6.5	7	7	0	0	1
6.5	7	8	0	1	0
6.5	7	9	0	0	1
6.5	7	10	0	0	1
6.5	7	11	0	0	1
6.5	7	12	0	0	0
6.5	7	13	0	0	1
6.5	7	14	0	1	0
6.5	7	15	0	0	1
6.5	7	16	0	1	0
6.5	7	17	0	0	1
6.5	7	18	0	0	1
6.5	7	19	0	0	1
6.5	7	20	0	0	1
6.5	7	21	0	0	1
6.5	7	22	0	0	1
6.5	7	23	0	0	1
6.5	7	24	0	1	0
6.5	7	25	0	0	1
6.5	7	26	0	0	1
6.5	7	27	0	0	1
6.5	7	28	0	0	1
6.5	7	29	0	0	1
6.5	7	30	0	0	0
6.5	7	31	0	1	0
6.5	7	32	0	0	1
6.5	7	33	0	0	0
6.5	7	34	0	1	1
6.5	7	35	0	0	1
6.5	7	36	0	0	1
6.5	7	37	0	0	1
6.5	7	38	0	1	1
6.5	7	39	0	0	1
6.5	7	40	0	0	1
7	7.5	1	0	0	1
7	7.5	2	0	0	1
7	7.5	3	0	0	1
7	7.5	4	0	0	1
7	7.5	5	0	1	1
7	7.5	6	0	0	0
7	7.5	7	0	1	0
7	7.5	8	0	0	1
7	7.5	9	0	0	1
7	7.5	10	0	0	1
7	7.5	11	0	0	0
7	7.5	12	0	1	1
7	7.5	13	0	1	0
7	7.5	14	0	1	0
7	7.5	15	0	0	1
7	7.5	16	0	1	0
7	7.5	17	0	0	1
7	7.5	18	0	0	1
7	7.5	19	0	0	1
7	7.5	20	0	0	1
7	7.5	21	0	0	1
7	7.5	22	0	0	1
7	7.5	23	0	0	1
7	7.5	24	0	1	0
7	7.5	25	0	0	1
7	7.5	26	0	0	1
7	7.5	27	0	0	1
7	7.5	28	0	1	1
7	7.5	29	0	0	1
7	7.5	30	0	0	0
7	7.5	31	0	1	1
7	7.5	32	0	0	1
7	7.5	33	0	0	1
7	7.5	34	0	1	1
7	7.5	35	0	0	1
7	7.5	36	0	1	1
7	7.5	37	0	0	1
7	7.5	38	0	1	0
7	7.5	39	0	0	0
7	7.5	40	0	0	1
7.5	8	1	0	0	1
7.5	8	2	0	0	1
7.5	8	3	0	0	1
7.5	8	4	0	0	1
7.5	8	5	0	1	1
7.5	8	6	0	1	0
7.5	8	7	0	1	0
7.5	8	8	0	0	1
7.5	8	9	0	0	1
7.5	8	10	0	0	1
7.5	8	11	0	0	1
7.5	8	12	0	1	1
7.5	8	13	0	0	0
7.5	8	14	0	1	0
7.5	8	15	0	1	1
7.5	8	16	1	1	0
7.5	8	17	0	0	0
7.5	8	18	0	0	1
7.5	8	19	0	0	1
7.5	8	20	0	0	1
7.5	8	21	0	0	1
7.5	8	22	0	0	1
7.5	8	23	0	0	1
7.5	8	24	0	1	0
7.5	8	25	0	0	1
7.5	8	26	0	0	1
7.5	8	27	0	1	1
7.5	8	28	0	1	1
7.5	8	29	0	0	1
7.5	8	30	0	0	0
7.5	8	31	0	0	0
7.5	8	32	0	0	1
7.5	8	33	0	0	1
7.5	8	34	0	0	1
7.5	8	35	0	0	0
7.5	8	36	0	1	1
7.5	8	37	0	0	1
7.5	8	38	0	1	0
7.5	8	39	0	1	0
7.5	8	40	0	0	1
8	8.5	1	0	0	1
8	8.5	2	0	0	1
8	8.5	3	0	0	1
8	8.5	4	0	0	1
8	8.5	5	0	1	1
8	8.5	6	0	0	0
8	8.5	7	0	1	0
8	8.5	8	0	0	1
8	8.5	9	0	0	1
8	8.5	10	0	1	1
8	8.5	11	0	0	1
8	8.5	12	0	0	1
8	8.5	13	0	1	1
8	8.5	14	0	1	0
8	8.5	15	0	0	0
8	8.5	16	0	0	1
8	8.5	17	1	1	0
8	8.5	18	0	0	0
8	8.5	19	0	0	1
8	8.5	20	0	0	1
8	8.5	21	0	0	1
8	8.5	22	0	0	1
8	8.5	23	0	0	1
8	8.5	24	0	0	1
8	8.5	25	0	1	0
8	8.5	26	0	0	1
8	8.5	27	0	0	1
8	8.5	28	0	1	1
8	8.5	29	0	0	1
8	8.5	30	0	0	1
8	8.5	31	0	0	0
8	8.5	32	0	0	0
8	8.5	33	0	0	1
8	8.5	34	0	0	1
8	8.5	35	0	0	1
8	8.5	36	0	1	0
8	8.5	37	0	1	1
8	8.5	38	0	0	1
8	8.5	39	0	1	0
8	8.5	40	0	1	0
8	8.5	41	0	0	1
8.5	9	1	0	0	1
8.5	9	2	0	0	1
8.5	9	3	0	0	1
8.5	9	4	0	0	1
8.5	9	5	0	0	1
8.5	9	6	0	0	0
8.5	9	7	0	1	1
8.5	9	8	0	0	1
8.5	9	9	0	0	1
8.5	9	10	0	1	0
8.5	9	11	0	0	1
8.5	9	12	0	1	1
8.5	9	13	0	1	1
8.5	9	14	0	1	1
8.5	9	15	0	0	0
8.5	9	16	0	0	1
8.5	9	17	0	1	0
8.5	9	18	0	1	0
8.5	9	19	0	0	1
8.5	9	20	0	1	0
8.5	9	21	0	0	1
8.5	9	22	0	0	1
8.5	9	23	0	0	1
8.5	9	24	0	1	1
8.5	9	25	0	1	0
8.5	9	26	0	0	1
8.5	9	27	0	0	1
8.5	9	28	0	0	1
8.5	9	29	0	0	1
8.5	9	30	0	0	1
8.5	9	31	0	0	0
8.5	9	32	0	0	0
8.5	9	33	0	0	1
8.5	9	34	0	0	1
8.5	9	35	0	0	1
8.5	9	36	0	1	0
8.5	9	37	0	0	1
8.5	9	38	0	0	1
8.5	9	39	1	1	0
8.5	9	40	0	0	1
8.5	9	41	0	0	1
9	9.5	1	0	0	1
9	9.5	2	0	0	1
9	9.5	3	0	0	1
9	9.5	4	0	0	1
9	9.5	5	0	0	1
9	9.5	6	0	0	0
9	9.5	7	0	0	1
9	9.5	8	0	1	0
9	9.5	9	0	0	1
9	9.5	10	0	1	0
9	9.5	11	0	0	1
9	9.5	12	0	0	1
9	9.5	13	0	1	1
9	9.5	14	0	1	0
9	9.5	15	0	0	1
9	9.5	16	0	0	0
9	9.5	17	0	1	0
9	9.5	18	0	0	1
9	9.5	19	0	1	1
9	9.5	20	0	0	1
9	9.5	21	0	0	1
9	9.5	22	0	1	1
9	9.5	23	0	1	1
9	9.5	24	0	0	1
9	9.5	25	0	0	1
9	9.5	26	0	1	1
9	9.5	27	0	0	1
9	9.5	28	0	0	1
9	9.5	29	0	0	1
9	9.5	30	0	1	0
9	9.5	31	0	1	0
9	9.5	32	0	0	1
9	9.5	33	0	0	1
9	9.5	34	0	0	1
9	9.5	35	0	1	0
9	9.5	36	0	0	1
9	9.5	37	0	0	1
9	9.5	38	0	1	0
9	9.5	39	0	0	1
9	9.5	40	0	0	1
9.5	10	1	0	0	1
9.5	10	2	0	0	1
9.5	10	3	0	1	1
9.5	10	4	0	0	1
9.5	10	5	0	0	1
9.5	10	6	0	0	0
9.5	10	7	0	0	1
9.5	10	8	0	1	0
9.5	10	9	0	1	1
9.5	10	10	0	1	0
9.5	10	11	0	1	1
9.5	10	12	0	0	0
9.5	10	13	0	0	1
9.5	10	14	0	0	1
9.5	10	15	0	1	0
9.5	10	16	0	0	1
9.5	10	17	0	0	0
9.5	10	18	0	1	0
9.5	10	19	0	0	1
9.5	10	20	0	1	1
9.5	10	21	0	0	1
9.5	10	22	0	1	1
9.5	10	23	0	1	0
9.5	10	24	0	0	1
9.5	10	25	0	0	1
9.5	10	26	0	0	1
9.5	10	27	0	1	1
9.5	10	28	0	0	1
9.5	10	29	0	0	1
9.5	10	30	0	0	1
9.5	10	31	0	1	0
9.5	10	32	0	1	0
9.5	10	33	0	0	1
9.5	10	34	0	0	1
9.5	10	35	0	0	1
9.5	10	36	1	1	0
9.5	10	37	0	1	1
9.5	10	38	0	0	1
9.5	10	39	0	1	0
9.5	10	40	0	0	1
9.5	10	41	0	0	0
10	10.5	1	0	0	1
10	10.5	2	0	0	1
10	10.5	3	0	1	1
10	10.5	4	0	0	1
10	10.5	5	0	0	1
10	10.5	6	0	1	0
10	10.5	7	0	0	1
10	10.5	8	0	1	1
10	10.5	9	0	1	1
10	10.5	10	0	1	0
10	10.5	11	0	1	1
10	10.5	12	0	1	0
10	10.5	13	0	0	1
10	10.5	14	0	0	1
10	10.5	15	0	1	0
10	10.5	16	0	0	1
10	10.5	17	0	0	1
10	10.5	18	0	1	0
10	10.5	19	0	1	1
10	10.5	20	0	0	1
10	10.5	21	0	0	1
10	10.5	22	0	1	0
10	10.5	23	0	1	1
10	10.5	24	0	0	1
10	10.5	25	0	0	1
10	10.5	26	0	0	1
10	10.5	27	0	0	1
10	10.5	28	0	0	1
10	10.5	29	0	0	1
10	10.5	30	0	0	1
10	10.5	31	0	1	0
10	10.5	32	0	1	0
10	10.5	33	0	0	1
10	10.5	34	0	0	1
10	10.5	35	0	0	1
10	10.5	36	0	1	0
10	10.5	37	0	1	1
10	10.5	38	0	0	1
10	10.5	39	0	1	0
10	10.5	40	0	1	1
10	10.5	41	0	0	0
10.5	11	1	0	0	1
10.5	11	2	0	0	1
10.5	11	3	0	0	1
10.5	11	4	0	1	0
10.5	11	5	0	0	1
10.5	11	6	1	1	0
10.5	11	7	0	0	1
10.5	11	8	0	1	1
10.5	11	9	0	1	1
10.5	11	10	0	1	0
10.5	11	11	0	1	1
10.5	11	12	0	1	0
10.5	11	13	0	0	1
10.5	11	14	0	1	0
10.5	11	15	0	1	0
10.5	11	16	0	0	1
10.5	11	17	0	0	1
10.5	11	18	0	1	0
10.5	11	19	0	1	1
10.5	11	20	0	0	1
10.5	11	21	0	0	1
10.5	11	22	0	1	0
10.5	11	23	0	0	1
10.5	11	24	0	0	1
10.5	11	25	0	0	0
10.5	11	26	0	0	1
10.5	11	27	0	0	1
10.5	11	28	0	0	1
10.5	11	29	0	0	1
10.5	11	30	0	0	1
10.5	11	31	0	1	1
10.5	11	32	0	1	1
10.5	11	33	0	0	1
10.5	11	34	0	0	1
10.5	11	35	0	0	1
10.5	11	36	0	0	0
10.5	11	37	0	1	1
10.5	11	38	0	0	1
10.5	11	39	0	1	0
10.5	11	40	0	1	1
10.5	11	41	0	0	0
11	11.5	1	0	0	1
11	11.5	2	0	0	1
11	11.5	3	0	0	1
11	11.5	4	0	1	0
11	11.5	5	0	0	1
11	11.5	6	0	1	0
11	11.5	7	0	0	1
11	11.5	8	0	0	1
11	11.5	9	0	1	1
11	11.5	10	0	1	1
11	11.5	11	0	0	1
11	11.5	12	0	1	1
11	11.5	13	0	0	1
11	11.5	14	0	1	0
11	11.5	15	0	1	0
11	11.5	16	0	0	1
11	11.5	17	0	0	1
11	11.5	18	0	1	1
11	11.5	19	0	0	1
11	11.5	20	0	0	1
11	11.5	21	0	0	1
11	11.5	22	0	1	1
11	11.5	23	0	0	1
11	11.5	24	0	0	1
11	11.5	25	0	0	0
11	11.5	26	0	0	1
11	11.5	27	0	0	1
11	11.5	28	0	0	0
11	11.5	29	0	0	1
11	11.5	30	0	0	1
11	11.5	31	0	1	1
11	11.5	32	0	0	1
11	11.5	33	0	0	1
11	11.5	34	0	0	0
11	11.5	35	0	1	1
11	11.5	36	0	0	1
11	11.5	37	0	1	1
11	11.5	38	0	0	1
11	11.5	39	0	1	0
11	11.5	40	0	0	1
11	11.5	41	0	0	0
11.5	12	1	0	0	1
11.5	12	2	0	0	1
11.5	12	3	0	1	1
11.5	12	4	0	1	0
11.5	12	5	0	0	1
11.5	12	6	0	1	0
11.5	12	7	0	0	1
11.5	12	8	0	1	0
11.5	12	9	0	1	1
11.5	12	10	0	0	1
11.5	12	11	0	0	1
11.5	12	12	0	1	0
11.5	12	13	0	0	1
11.5	12	14	1	1	0
11.5	12	15	0	0	1
11.5	12	16	0	0	1
11.5	12	17	0	0	1
11.5	12	18	0	0	0
11.5	12	19	0	0	1
11.5	12	20	0	1	1
11.5	12	21	0	0	0
11.5	12	22	0	0	1
11.5	12	23	0	0	0
11.5	12	24	0	0	1
11.5	12	25	0	0	1
11.5	12	26	0	1	0
11.5	12	27	0	0	1
11.5	12	28	0	0	1
11.5	12	29	0	1	1
11.5	12	30	0	0	1
11.5	12	31	0	0	1
11.5	12	32	0	0	0
11.5	12	33	0	1	1
11.5	12	34	0	1	1
11.5	12	35	0	0	1
11.5	12	36	0	0	1
11.5	12	37	0	1	0
11.5	12	38	0	0	1
11.5	12	39	0	0	0
12	12.5	1	0	0	1
12	12.5	2	0	0	1
12	12.5	3	0	1	1
12	12.5	4	0	1	1
12	12.5	5	0	0	1
12	12.5	6	0	0	0
12	12.5	7	0	0	1
12	12.5	8	0	1	0
12	12.5	9	0	1	0
12	12.5	10	0	0	1
12	12.5	11	0	0	1
12	12.5	12	0	0	1
12	12.5	13	0	0	1
12	12.5	14	0	1	0
12	12.5	15	0	0	1
12	12.5	16	0	0	1
12	12.5	17	0	0	1
12	12.5	18	0	1	0
12	12.5	19	0	0	1
12	12.5	20	0	1	0
12	12.5	21	0	1	0
12	12.5	22	0	0	1
12	12.5	23	0	0	0
12	12.5	24	0	0	1
12	12.5	25	0	0	1
12	12.5	26	0	1	1
12	12.5	27	0	0	1
12	12.5	28	0	0	1
12	12.5	29	0	1	0
12	12.5	30	0	0	1
12	12.5	31	0	0	1
12	12.5	32	0	0	1
12	12.5	33	0	1	1
12	12.5	34	0	1	1
12	12.5	35	0	0	1
12	12.5	36	0	0	1
12	12.5	37	0	1	0
12	12.5	38	0	0	0
12	12.5	39	0	0	0
12.5	13	1	0	0	1
12.5	13	2	0	0	1
12.5	13	3	0	1	1
12.5	13	4	0	0	1
12.5	13	5	0	0	1
12.5	13	6	0	0	1
12.5	13	7	0	0	1
12.5	13	8	0	1	0
12.5	13	9	0	1	1
12.5	13	10	0	0	1
12.5	13	11	0	0	1
12.5	13	12	0	1	0
12.5	13	13	0	0	1
12.5	13	14	0	1	1
12.5	13	15	0	1	0
12.5	13	16	0	0	1
12.5	13	17	0	1	0
12.5	13	18	0	0	1
12.5	13	19	0	0	1
12.5	13	20	0	1	1
12.5	13	21	0	0	1
12.5	13	22	0	1	0
12.5	13	23	0	1	0
12.5	13	24	0	1	1
12.5	13	25	0	0	0
12.5	13	26	0	0	1
12.5	13	27	0	0	1
12.5	13	28	0	0	1
12.5	13	29	0	1	1
12.5	13	30	0	0	1
12.5	13	31	0	1	0
12.5	13	32	0	0	1
12.5	13	33	0	0	1
12.5	13	34	0	0	1
12.5	13	35	0	0	1
12.5	13	36	0	1	1
12.5	13	37	0	0	1
12.5	13	38	0	0	1
12.5	13	39	0	1	0
12.5	13	40	0	0	0
12.5	13	41	0	0	0
13	13.5	1	0	0	1
13	13.5	2	0	0	1
13	13.5	3	0	0	1
13	13.5	4	0	1	0
13	13.5	5	0	0	1
13	13.5	6	0	0	0
13	13.5	7	0	0	1
13	13.5	8	0	1	0
13	13.5	9	0	1	1
13	13.5	10	0	0	1
13	13.5	11	0	0	1
13	13.5	12	0	0	1
13	13.5	13	1	1	1
13	13.5	14	0	1	0
13	13.5	15	0	0	1
13	13.5	16	0	1	0
13	13.5	17	0	0	1
13	13.5	18	0	0	1
13	13.5	19	0	0	1
13	13.5	20	0	0	1
13	13.5	21	0	1	0
13	13.5	22	0	1	0
13	13.5	23	0	1	1
13	13.5	24	0	0	1
13	13.5	25	0	0	1
13	13.5	26	0	0	1
13	13.5	27	0	0	1
13	13.5	28	0	1	1
13	13.5	29	0	0	1
13	13.5	30	0	1	0
13	13.5	31	0	0	1
13	13.5	32	0	0	1
13	13.5	33	0	0	1
13	13.5	34	0	0	1
13	13.5	35	0	0	1
13	13.5	36	0	0	1
13	13.5	37	0	0	1
13	13.5	38	0	1	0
13	13.5	39	0	1	0
13	13.5	40	0	1	0
13.5	14	1	0	0	1
13.5	14	2	0	0	1
13.5	14	3	0	0	1
13.5	14	4	0	1	0
13.5	14	5	0	0	1
13.5	14	6	0	1	0
13.5	14	7	0	0	1
13.5	14	8	0	1	0
13.5	14	9	0	1	1
13.5	14	10	0	0	1
13.5	14	11	0	0	1
13.5	14	12	0	0	1
13.5	14	13	0	1	0
13.5	14	14	0	1	0
13.5	14	15	0	0	1
13.5	14	16	0	0	1
13.5	14	17	0	1	0
13.5	14	18	0	0	1
13.5	14	19	0	0	1
13.5	14	20	0	0	1
13.5	14	21	1	1	0
13.5	14	22	0	1	1
13.5	14	23	0	1	1
13.5	14	24	0	0	1
13.5	14	25	0	0	1
13.5	14	26	0	0	1
13.5	14	27	0	0	1
13.5	14	28	0	1	1
13.5	14	29	0	0	1
13.5	14	30	0	1	0
13.5	14	31	0	0	1
13.5	14	32	0	0	1
13.5	14	33	0	0	1
13.5	14	34	0	0	1
13.5	14	35	0	0	1
13.5	14	36	0	0	1
13.5	14	37	0	0	1
13.5	14	38	0	1	0
13.5	14	39	1	1	0
13.5	14	40	0	1	0
14	14.5	1	0	0	1
14	14.5	2	0	0	1
14	14.5	3	0	0	1
14	14.5	4	0	1	0
14	14.5	5	0	0	1
14	14.5	6	0	1	0
14	14.5	7	0	0	1
14	14.5	8	0	1	0
14	14.5	9	0	0	1
14	14.5	10	0	1	0
14	14.5	11	0	0	1
14	14.5	12	0	0	1
14	14.5	13	0	1	0
14	14.5	14	0	1	0
14	14.5	15	0	0	1
14	14.5	16	0	0	1
14	14.5	17	0	1	0
14	14.5	18	0	0	1
14	14.5	19	0	0	1
14	14.5	20	0	0	1
14	14.5	21	1	1	0
14	14.5	22	0	0	0
14	14.5	23	0	0	1
14	14.5	24	0	0	1
14	14.5	25	0	0	1
14	14.5	26	0	0	1
14	14.5	27	0	0	1
14	14.5	28	0	0	1
14	14.5	29	0	0	1
14	14.5	30	0	0	0
14	14.5	31	0	1	0
14	14.5	32	0	0	1
14	14.5	33	0	0	1
14	14.5	34	0	0	1
14	14.5	35	0	0	1
14	14.5	36	0	0	1
14	14.5	37	0	0	1
14	14.5	38	0	0	0
14	14.5	39	0	1	0
14	14.5	40	0	1	0
14.5	15	1	0	0	1
14.5	15	2	0	0	1
14.5	15	3	0	1	1
14.5	15	4	0	1	0
14.5	15	5	0	0	1
14.5	15	6	0	0	1
14.5	15	7	0	1	0
14.5	15	8	0	0	1
14.5	15	9	0	1	0
14.5	15	10	0	0	1
14.5	15	11	0	0	1
14.5	15	12	0	0	1
14.5	15	13	0	1	0
14.5	15	14	0	0	1
14.5	15	15	0	0	1
14.5	15	16	0	1	0
14.5	15	17	0	0	1
14.5	15	18	0	1	0
14.5	15	19	0	0	1
14.5	15	20	0	1	0
14.5	15	21	0	0	0
14.5	15	22	0	0	1
14.5	15	23	0	0	1
14.5	15	24	0	0	1
14.5	15	25	0	1	1
14.5	15	26	0	1	1
14.5	15	27	0	0	1
14.5	15	28	0	0	1
14.5	15	29	0	0	1
14.5	15	30	0	1	0
14.5	15	31	0	0	1
14.5	15	32	0	0	0
14.5	15	33	0	0	1
14.5	15	34	0	0	1
14.5	15	35	0	0	1
14.5	15	36	0	0	1
14.5	15	37	0	1	0
14.5	15	38	0	0	0
14.5	15	39	0	0	0
15	15.5	1	0	0	1
15	15.5	2	0	0	1
15	15.5	3	0	1	1
15	15.5	4	0	1	0
15	15.5	5	0	0	1
15	15.5	6	0	0	1
15	15.5	7	0	1	0
15	15.5	8	0	1	0
15	15.5	9	0	0	1
15	15.5	10	0	1	1
15	15.5	11	0	1	0
15	15.5	12	0	1	1
15	15.5	13	0	0	0
15	15.5	14	0	0	1
15	15.5	15	0	0	0
15	15.5	16	0	1	0
15	15.5	17	0	0	1
15	15.5	18	0	1	0
15	15.5	19	0	0	1
15	15.5	20	0	0	0
15	15.5	21	0	0	0
15	15.5	22	0	0	1
15	15.5	23	0	0	1
15	15.5	24	0	0	1
15	15.5	25	0	0	1
15	15.5	26	0	1	1
15	15.5	27	0	0	1
15	15.5	28	0	0	1
15	15.5	29	0	0	1
15	15.5	30	0	1	0
15	15.5	31	0	0	1
15	15.5	32	0	0	0
15	15.5	33	0	0	1
15	15.5	34	0	1	1
15	15.5	35	0	0	1
15	15.5	36	0	0	1
15	15.5	37	0	0	1
15	15.5	38	0	0	0
15.5	16	1	0	0	1
15.5	16	2	0	0	1
15.5	16	3	0	1	1
15.5	16	4	0	1	0
15.5	16	5	0	0	1
15.5	16	6	0	0	1
15.5	16	7	0	1	0
15.5	16	8	0	1	1
15.5	16	9	0	0	1
15.5	16	10	0	1	1
15.5	16	11	0	1	0
15.5	16	12	0	1	0
15.5	16	13	0	1	1
15.5	16	14	0	0	1
15.5	16	15	0	0	1
15.5	16	16	0	0	0
15.5	16	17	0	1	0
15.5	16	18	0	0	1
15.5	16	19	0	1	0
15.5	16	20	0	1	1
15.5	16	21	0	1	0
15.5	16	22	0	1	0
15.5	16	23	0	0	1
15.5	16	24	0	0	1
15.5	16	25	0	0	1
15.5	16	26	0	0	1
15.5	16	27	0	1	0
15.5	16	28	0	0	1
15.5	16	29	0	0	1
15.5	16	30	0	0	1
15.5	16	31	0	1	1
15.5	16	32	0	0	1
15.5	16	33	0	0	0
15.5	16	34	0	0	1
15.5	16	35	0	0	1
15.5	16	36	0	1	1
15.5	16	37	0	0	1
15.5	16	38	0	0	1
15.5	16	39	0	0	0
16	16.5	1	0	0	1
16	16.5	2	0	0	1
16	16.5	3	0	0	1
16	16.5	4	0	1	0
16	16.5	5	0	0	1
16	16.5	6	0	0	1
16	16.5	7	0	1	0
16	16.5	8	0	1	0
16	16.5	9	0	0	1
16	16.5	10	0	1	1
16	16.5	11	0	1	1
16	16.5	12	0	1	0
16	16.5	13	0	0	1
16	16.5	14	0	1	1
16	16.5	15	0	0	1
16	16.5	16	0	0	0
16	16.5	17	0	1	0
16	16.5	18	0	0	1
16	16.5	19	0	1	0
16	16.5	20	0	1	1
16	16.5	21	0	1	0
16	16.5	22	0	1	0
16	16.5	23	0	0	1
16	16.5	24	0	0	1
16	16.5	25	0	0	1
16	16.5	26	0	0	1
16	16.5	27	0	0	0
16	16.5	28	0	1	1
16	16.5	29	0	0	1
16	16.5	30	0	0	0
16	16.5	31	0	0	1
16	16.5	32	0	0	1
16	16.5	33	0	0	1
16	16.5	34	0	0	1
16	16.5	35	0	0	1
16	16.5	36	0	0	1
16	16.5	37	0	0	1
16	16.5	38	0	1	0
16	16.5	39	0	0	1
16	16.5	40	0	0	0
16.5	17	1	0	0	1
16.5	17	2	0	1	1
16.5	17	3	0	0	1
16.5	17	4	0	1	0
16.5	17	5	0	1	0
16.5	17	6	0	0	1
16.5	17	7	0	1	0
16.5	17	8	0	1	0
16.5	17	9	0	0	1
16.5	17	10	0	0	1
16.5	17	11	0	1	1
16.5	17	12	0	1	0
16.5	17	13	0	0	1
16.5	17	14	0	1	1
16.5	17	15	1	1	0
16.5	17	16	0	0	1
16.5	17	17	0	0	0
16.5	17	18	0	1	0
16.5	17	19	0	1	0
16.5	17	20	0	0	0
16.5	17	21	0	1	1
16.5	17	22	0	1	0
16.5	17	23	0	1	0
16.5	17	24	0	1	1
16.5	17	25	0	0	1
16.5	17	26	0	1	1
16.5	17	27	0	1	1
16.5	17	28	0	0	0
16.5	17	29	0	1	1
16.5	17	30	0	0	1
16.5	17	31	0	0	0
16.5	17	32	0	0	0
16.5	17	33	0	1	1
16.5	17	34	0	0	1
16.5	17	35	0	1	1
16.5	17	36	0	0	1
16.5	17	37	0	1	0
16.5	17	38	0	0	1
16.5	17	39	0	1	0
16.5	17	40	0	0	1
16.5	17	41	0	0	0
17	17.5	1	0	0	1
17	17.5	2	0	1	1
17	17.5	3	0	0	1
17	17.5	4	0	1	0
17	17.5	5	0	1	0
17	17.5	6	0	1	0
17	17.5	7	1	1	0
17	17.5	8	0	0	1
17	17.5	9	0	1	1
17	17.5	10	0	0	1
17	17.5	11	0	1	0
17	17.5	12	0	1	0
17	17.5	13	1	1	0
17	17.5	14	1	1	0
17	17.5	15	0	1	0
17	17.5	16	0	1	0
17	17.5	17	0	1	0
17	17.5	18	0	1	1
17	17.5	19	0	0	0
17	17.5	20	0	1	0
17	17.5	21	1	1	0
17	17.5	22	0	1	0
17	17.5	23	0	1	1
17	17.5	24	0	0	0
17	17.5	25	0	0	0
17	17.5	26	0	1	1
17	17.5	27	0	0	0
17	17.5	28	0	1	1
17	17.5	29	0	0	1
17	17.5	30	0	0	0
17	17.5	31	0	0	0
17	17.5	32	0	1	1
17	17.5	33	0	0	1
17	17.5	34	0	1	0
17	17.5	35	0	0	1
17	17.5	36	0	1	0
17	17.5	37	0	1	1
17	17.5	38	0	1	0
17	17.5	39	0	0	1
17	17.5	40	0	1	0
17.5	18	1	0	0	1
17.5	18	2	0	1	0
17.5	18	3	0	0	1
17.5	18	4	0	0	0
17.5	18	5	0	1	0
17.5	18	6	0	0	1
17.5	18	7	0	1	0
17.5	18	8	0	0	1
17.5	18	9	0	1	0
17.5	18	10	0	1	0
17.5	18	11	0	1	0
17.5	18	12	0	1	0
17.5	18	13	0	1	0
17.5	18	14	0	1	0
17.5	18	15	0	1	0
17.5	18	16	0	1	0
17.5	18	17	0	1	0
17.5	18	18	0	1	1
17.5	18	19	0	0	0
17.5	18	20	0	1	0
17.5	18	21	1	1	0
17.5	18	22	0	1	0
17.5	18	23	0	0	1
17.5	18	24	0	1	0
17.5	18	25	0	1	0
17.5	18	26	0	0	0
17.5	18	27	0	1	0
17.5	18	28	0	0	1
17.5	18	29	0	1	1
17.5	18	30	0	1	0
17.5	18	31	0	1	0
17.5	18	32	0	1	0
17.5	18	33	0	0	0
17.5	18	34	0	1	0
17.5	18	35	1	1	0
17.5	18	36	0	1	0
17.5	18	37	0	1	0
17.5	18	38	0	1	0
17.5	18	39	0	1	1
17.5	18	40	0	1	0
18	18.5	1	0	0	0
18	18.5	2	0	1	0
18	18.5	3	0	1	0
18	18.5	4	0	1	0
18	18.5	5	0	1	0
18	18.5	6	0	1	0
18	18.5	7	1	1	0
18	18.5	8	0	1	1
18	18.5	9	0	1	0
18	18.5	10	0	1	0
18	18.5	11	0	1	0
18	18.5	12	0	1	0
18	18.5	13	0	1	0
18	18.5	14	0	1	0
18	18.5	15	0	1	0
18	18.5	16	0	1	0
18	18.5	17	0	1	1
18	18.5	18	0	1	0
18	18.5	19	0	1	0
18	18.5	20	1	1	0
18	18.5	21	0	1	0
18	18.5	22	0	0	1
18	18.5	23	0	1	0
18	18.5	24	1	1	0
18	18.5	25	0	1	0
18	18.5	26	0	0	1
18	18.5	27	0	1	0
18	18.5	28	0	1	0
18	18.5	29	0	1	0
18	18.5	30	0	1	0
18	18.5	31	0	0	0
18	18.5	32	0	1	0
18	18.5	33	1	1	0
18	18.5	34	0	1	0
18	18.5	35	0	0	0
18	18.5	36	0	1	0
18	18.5	37	0	1	0
18	18.5	38	0	1	0
18.5	19	1	0	1	0
18.5	19	2	0	1	0
18.5	19	3	0	1	0
18.5	19	4	0	1	0
18.5	19	5	0	1	0
18.5	19	6	1	1	0
18.5	19	7	0	1	0
18.5	19	8	0	1	0
18.5	19	9	0	1	0
18.5	19	10	0	1	0
18.5	19	11	0	1	0
18.5	19	12	0	1	0
18.5	19	13	0	1	0
18.5	19	14	0	1	0
18.5	19	15	0	1	0
18.5	19	16	0	1	0
18.5	19	17	0	1	0
18.5	19	18	0	1	0
18.5	19	19	1	1	0
18.5	19	20	0	1	0
18.5	19	21	0	1	0
18.5	19	22	1	1	0
18.5	19	23	0	1	0
18.5	19	24	1	1	0
18.5	19	25	0	1	0
18.5	19	26	0	1	0
18.5	19	27	0	1	0
18.5	19	28	0	1	0
18.5	19	29	0	0	1
18.5	19	30	0	1	0
18.5	19	31	1	1	0
18.5	19	32	1	1	0
18.5	19	33	1	1	0
18.5	19	34	0	1	0
18.5	19	35	0	1	0
18.5	19	36	0	1	0
18.5	19	37	0	1	0
18.5	19	38	0	1	0
18.5	19	39	0	1	0
18.5	19	40	0	1	0
18.5	19	41	0	1	0
19	19.5	1	0	1	0
19	19.5	2	1	1	0
19	19.5	3	0	1	0
19	19.5	4	1	1	0
19	19.5	5	0	1	0
19	19.5	6	0	1	0
19	19.5	7	0	1	0
19	19.5	8	0	1	0
19	19.5	9	0	1	0
19	19.5	10	0	1	0
19	19.5	11	0	1	0
19	19.5	12	0	1	0
19	19.5	13	0	1	0
19	19.5	14	0	1	0
19	19.5	15	0	1	0
19	19.5	16	0	1	0
19	19.5	17	0	1	0
19	19.5	18	1	1	0
19	19.5	19	1	1	0
19	19.5	20	1	1	0
19	19.5	21	0	1	0
19	19.5	22	1	1	0
19	19.5	23	0	1	1
19	19.5	24	0	1	0
19	19.5	25	1	1	0
19	19.5	26	0	1	0
19	19.5	27	0	0	1
19	19.5	28	0	1	0
19	19.5	29	1	1	0
19	19.5	30	1	1	0
19	19.5	31	0	1	0
19	19.5	32	0	1	0
19	19.5	33	1	1	0
19	19.5	34	1	1	0
19	19.5	35	0	1	0
19	19.5	36	0	1	0
19	19.5	37	1	1	0
19	19.5	38	0	1	0
19	19.5	39	0	1	0
19.5	20	1	0	1	0
19.5	20	2	1	1	0
19.5	20	3	0	1	0
19.5	20	4	0	1	0
19.5	20	5	1	1	0
19.5	20	6	0	1	0
19.5	20	7	1	1	0
19.5	20	8	0	1	0
19.5	20	9	0	1	0
19.5	20	10	0	1	0
19.5	20	11	0	1	0
19.5	20	12	0	1	0
19.5	20	13	0	1	0
19.5	20	14	0	1	0
19.5	20	15	0	1	0
19.5	20	16	0	1	0
19.5	20	17	1	1	0
19.5	20	18	0	1	0
19.5	20	19	1	1	0
19.5	20	20	1	1	0
19.5	20	21	1	1	0
19.5	20	22	1	1	0
19.5	20	23	1	1	0
19.5	20	24	0	1	0
19.5	20	25	0	1	0
19.5	20	26	1	1	0
19.5	20	27	0	1	0
19.5	20	28	0	1	1
19.5	20	29	1	1	0
19.5	20	30	1	1	0
19.5	20	31	1	1	0
19.5	20	32	0	1	0
19.5	20	33	0	1	0
19.5	20	34	1	1	0
19.5	20	35	0	1	0
19.5	20	36	1	1	0
19.5	20	37	0	1	0
19.5	20	38	1	1	0
19.5	20	39	1	1	0
19.5	20	40	0	1	0
20	20.5	1	1	1	0
20	20.5	2	0	1	0
20	20.5	3	0	1	0
20	20.5	4	1	1	0
20	20.5	5	1	1	0
20	20.5	6	0	1	1
20	20.5	7	1	1	0
20	20.5	8	0	1	0
20	20.5	9	0	0	0
20	20.5	10	0	1	0
20	20.5	11	1	1	0
20	20.5	12	1	1	0
20	20.5	13	0	1	1
20	20.5	14	1	1	0
20	20.5	15	0	1	0
20	20.5	16	1	1	0
20	20.5	17	0	1	0
20	20.5	18	0	1	0
20	20.5	19	1	1	0
20	20.5	20	1	1	0
20	20.5	21	1	1	0
20	20.5	22	1	1	0
20	20.5	23	1	1	0
20	20.5	24	0	1	0
20	20.5	25	1	1	0
20	20.5	26	0	1	0
20	20.5	27	0	1	0
20	20.5	28	0	1	1
20	20.5	29	0	1	0
20	20.5	30	1	1	0
20	20.5	31	0	1	0
20	20.5	32	1	1	0
20	20.5	33	0	1	0
20	20.5	34	0	1	0
20	20.5	35	0	1	0
20	20.5	36	1	1	0
20	20.5	37	1	1	0
20	20.5	38	0	1	0
20	20.5	39	0	1	0
20.5	21	1	1	1	0
20.5	21	2	0	1	0
20.5	21	3	0	1	0
20.5	21	4	1	1	0
20.5	21	5	1	1	0
20.5	21	6	1	1	0
20.5	21	7	1	1	0
20.5	21	8	0	0	0
20.5	21	9	0	0	0
20.5	21	10	0	1	0
20.5	21	11	1	1	0
20.5	21	12	0	1	0
20.5	21	13	0	1	0
20.5	21	14	0	1	0
20.5	21	15	0	1	0
20.5	21	16	0	1	0
20.5	21	17	0	1	0
20.5	21	18	0	1	0
20.5	21	19	1	1	0
20.5	21	20	1	1	0
20.5	21	21	0	1	0
20.5	21	22	1	1	0
20.5	21	23	1	1	0
20.5	21	24	0	1	0
20.5	21	25	0	1	0
20.5	21	26	0	1	0
20.5	21	27	0	1	0
20.5	21	28	0	1	0
20.5	21	29	1	1	0
20.5	21	30	0	1	0
20.5	21	31	0	1	0
20.5	21	32	1	1	1
20.5	21	33	0	1	0
20.5	21	34	1	1	0
20.5	21	35	0	1	0
20.5	21	36	1	1	0
20.5	21	37	1	1	0
20.5	21	38	1	1	0
20.5	21	39	0	1	0
21	21.5	1	1	1	0
21	21.5	2	1	1	0
21	21.5	3	0	1	0
21	21.5	4	1	1	0
21	21.5	5	1	1	0
21	21.5	6	0	1	0
21	21.5	7	1	1	0
21	21.5	8	0	0	0
21	21.5	9	0	0	0
21	21.5	10	0	1	0
21	21.5	11	1	1	0
21	21.5	12	0	1	0
21	21.5	13	0	1	0
21	21.5	14	0	1	0
21	21.5	15	0	1	0
21	21.5	16	0	1	0
21	21.5	17	0	1	0
21	21.5	18	1	1	0
21	21.5	19	0	1	0
21	21.5	20	0	1	0
21	21.5	21	0	1	0
21	21.5	22	1	1	0
21	21.5	23	0	1	0
21	21.5	24	0	0	0
21	21.5	25	0	1	0
21	21.5	26	0	1	0
21	21.5	27	0	1	0
21	21.5	28	0	1	0
21	21.5	29	0	1	0
21	21.5	30	0	1	0
21	21.5	31	0	1	0
21	21.5	32	1	1	0
21	21.5	33	0	1	1
21	21.5	34	0	1	1
21	21.5	35	1	1	0
21	21.5	36	0	1	0
21	21.5	37	0	1	0
21	21.5	38	0	1	0
21.5	22	1	1	1	0
21.5	22	2	1	1	0
21.5	22	3	0	1	0
21.5	22	4	1	1	0
21.5	22	5	1	1	0
21.5	22	6	1	1	0
21.5	22	7	1	1	0
21.5	22	8	0	1	0
21.5	22	9	0	0	0
21.5	22	10	0	1	0
21.5	22	11	0	1	0
21.5	22	12	1	1	0
21.5	22	13	0	1	0
21.5	22	14	0	1	0
21.5	22	15	0	1	0
21.5	22	16	0	1	0
21.5	22	17	1	1	0
21.5	22	18	0	1	0
21.5	22	19	1	1	0
21.5	22	20	1	1	0
21.5	22	21	0	1	0
21.5	22	22	0	1	0
21.5	22	23	1	1	0
21.5	22	24	0	1	0
21.5	22	25	0	0	1
21.5	22	26	0	1	0
21.5	22	27	0	1	0
21.5	22	28	1	1	0
21.5	22	29	1	1	0
21.5	22	30	0	1	0
21.5	22	31	0	1	0
21.5	22	32	0	1	1
21.5	22	33	0	1	1
21.5	22	34	0	1	0
21.5	22	35	1	1	0
21.5	22	36	1	1	0
21.5	22	37	1	1	0
21.5	22	38	0	1	0
21.5	22	39	0	1	0
22	22.5	1	1	1	0
22	22.5	2	0	1	0
22	22.5	3	0	1	0
22	22.5	4	1	1	0
22	22.5	5	0	1	0
22	22.5	6	0	1	0
22	22.5	7	1	1	0
22	22.5	8	0	1	0
22	22.5	9	0	0	0
22	22.5	10	0	1	0
22	22.5	11	0	1	0
22	22.5	12	0	1	0
22	22.5	13	1	1	0
22	22.5	14	0	1	0
22	22.5	15	1	1	0
22	22.5	16	0	0	0
22	22.5	17	0	1	0
22	22.5	18	0	1	0
22	22.5	19	1	1	0
22	22.5	20	1	1	0
22	22.5	21	0	1	0
22	22.5	22	1	1	0
22	22.5	23	0	1	0
22	22.5	24	0	1	0
22	22.5	25	0	0	0
22	22.5	26	0	0	1
22	22.5	27	0	1	0
22	22.5	28	0	1	0
22	22.5	29	1	1	0
22	22.5	30	1	1	0
22	22.5	31	0	1	0
22	22.5	32	0	1	0
22	22.5	33	0	1	1
22	22.5	34	0	1	0
22	22.5	35	1	1	0
22	22.5	36	0	1	0
22	22.5	37	1	1	0
22	22.5	38	1	1	0
22	22.5	39	0	1	0
22	22.5	40	0	1	0
22.5	23	1	0	1	0
22.5	23	2	0	1	0
22.5	23	3	1	1	0
22.5	23	4	0	1	0
22.5	23	5	0	1	0
22.5	23	6	1	1	0
22.5	23	7	1	1	0
22.5	23	8	0	1	0
22.5	23	9	0	1	0
22.5	23	10	0	1	0
22.5	23	11	0	1	0
22.5	23	12	0	1	0
22.5	23	13	1	1	0
22.5	23	14	0	1	0
22.5	23	15	0	1	0
22.5	23	16	0	1	1
22.5	23	17	0	1	0
22.5	23	18	0	1	0
22.5	23	19	0	1	0
22.5	23	20	0	1	0
22.5	23	21	0	1	0
22.5	23	22	0	1	0
22.5	23	23	0	1	1
22.5	23	24	0	1	0
22.5	23	25	0	1	0
22.5	23	26	0	0	1
22.5	23	27	0	0	0
22.5	23	28	1	1	0
22.5	23	29	1	1	0
22.5	23	30	0	0	0
22.5	23	31	0	1	0
22.5	23	32	1	1	0
22.5	23	33	0	0	1
22.5	23	34	1	1	0
22.5	23	35	0	0	1
22.5	23	36	0	1	0
22.5	23	37	0	0	0
22.5	23	38	0	1	0
22.5	23	39	0	1	0
22.5	23	40	0	1	0
22.5	23	41	0	0	0
23	23.5	1	0	0	0
23	23.5	2	0	1	0
23	23.5	3	0	1	0
23	23.5	4	0	1	0
23	23.5	5	0	1	0
23	23.5	6	0	1	0
23	23.5	7	0	1	0
23	23.5	8	0	1	0
23	23.5	9	0	1	0
23	23.5	10	0	1	0
23	23.5	11	0	0	1
23	23.5	12	0	0	0
23	23.5	13	0	1	0
23	23.5	14	0	1	1
23	23.5	15	0	1	0
23	23.5	16	0	1	1
23	23.5	17	0	1	1
23	23.5	18	0	1	0
23	23.5	19	0	1	0
23	23.5	20	0	0	0
23	23.5	21	0	1	1
23	23.5	22	0	1	0
23	23.5	23	0	1	1
23	23.5	24	0	1	1
23	23.5	25	0	1	0
23	23.5	26	0	0	1
23	23.5	27	0	0	0
23	23.5	28	1	1	0
23	23.5	29	0	1	0
23	23.5	30	0	0	0
23	23.5	31	0	1	0
23	23.5	32	0	1	0
23	23.5	33	0	0	1
23	23.5	34	0	1	0
23	23.5	35	0	0	1
23	23.5	36	0	1	0
23	23.5	37	0	0	1
23	23.5	38	0	0	0
23	23.5	39	0	1	0
23	23.5	40	0	1	0
23	23.5	41	0	0	1
23.5	24	1	0	0	1
23.5	24	2	0	1	0
23.5	24	3	0	1	0
23.5	24	4	0	1	0
23.5	24	5	0	1	0
23.5	24	6	0	1	0
23.5	24	7	0	0	0
23.5	24	8	0	1	0
23.5	24	9	0	1	0
23.5	24	10	0	1	0
23.5	24	11	0	0	1
23.5	24	12	0	0	1
23.5	24	13	0	1	0
23.5	24	14	0	1	1
23.5	24	15	0	1	0
23.5	24	16	0	0	1
23.5	24	17	0	0	1
23.5	24	18	0	1	0
23.5	24	19	0	0	1
23.5	24	20	0	0	1
23.5	24	21	0	0	1
23.5	24	22	0	1	0
23.5	24	23	0	1	1
23.5	24	24	0	0	1
23.5	24	25	0	1	1
23.5	24	26	0	0	1
23.5	24	27	0	0	1
23.5	24	28	0	1	0
23.5	24	29	0	1	0
23.5	24	30	0	0	1
23.5	24	31	0	1	0
23.5	24	32	0	1	0
23.5	24	33	0	0	1
23.5	24	34	0	1	0
23.5	24	35	0	0	1
23.5	24	36	0	1	0
23.5	24	37	0	0	1
23.5	24	38	0	0	1
23.5	24	39	0	1	1
23.5	24	40	0	1	0
23.5	24	41	0	0	1
24	24.5	1	0	0	1
24	24.5	2	0	1	0
24	24.5	3	0	1	0
24	24.5	4	0	1	0
24	24.5	5	0	1	0
24	24.5	6	0	0	0
24	24.5	7	0	1	1
24	24.5	8	0	1	0
24	24.5	9	0	1	0
24	24.5	10	0	1	0
24	24.5	11	0	0	1
24	24.5	12	0	1	0
24	24.5	13	0	0	1
24	24.5	14	0	1	0
24	24.5	15	0	0	1
24	24.5	16	0	0	1
24	24.5	17	0	1	0
24	24.5	18	0	0	1
24	24.5	19	0	1	1
24	24.5	20	0	0	1
24	24.5	21	0	1	0
24	24.5	22	0	0	1
24	24.5	23	0	0	1
24	24.5	24	0	1	1
24	24.5	25	0	1	1
24	24.5	26	0	0	1
24	24.5	27	0	0	0
24	24.5	28	0	1	1
24	24.5	29	0	0	1
24	24.5	30	0	1	0
24	24.5	31	0	1	0
24	24.5	32	0	0	1
24	24.5	33	0	1	1
24	24.5	34	0	0	1
24	24.5	35	0	1	0
24	24.5	36	0	0	1
24	24.5	37	0	0	1
24	24.5	38	0	1	1
24	24.5	39	0	0	1
24	24.5	40	0	0	1
24.5	25	1	0	0	1
24.5	25	2	0	1	0
24.5	25	3	0	1	0
24.5	25	4	0	1	0
24.5	25	5	0	1	1
24.5	25	6	0	1	0
24.5	25	7	0	1	1
24.5	25	8	0	1	0
24.5	25	9	1	1	0
24.5	25	10	0	1	0
24.5	25	11	0	0	1
24.5	25	12	0	1	1
24.5	25	13	0	0	1
24.5	25	14	0	1	0
24.5	25	15	0	0	1
24.5	25	16	0	1	1
24.5	25	17	0	0	0
24.5	25	18	0	0	1
24.5	25	19	0	1	0
24.5	25	20	0	0	1
24.5	25	21	0	1	0
24.5	25	22	0	1	1
24.5	25	23	0	0	1
24.5	25	24	0	1	0
24.5	25	25	0	1	1
24.5	25	26	0	1	1
24.5	25	27	0	0	1
24.5	25	28	0	1	0
24.5	25	29	0	0	1
24.5	25	30	0	1	0
24.5	25	31	0	1	0
24.5	25	32	0	0	1
24.5	25	33	0	0	1
24.5	25	34	0	0	1
24.5	25	35	0	1	0
24.5	25	36	0	1	1
24.5	25	37	0	0	1
24.5	25	38	0	0	1
24.5	25	39	0	0	1
24.5	25	40	0	0	1
25	25.5	1	0	0	1
25	25.5	2	0	1	0
[truncated: 2,842 more rows]

## Sheet: 72F11>dTrpA1-data
timeBinStart	timeBinStop	larva	boolRoll	boolBend	boolCrawl
0	0.5	1	0	0	0
0	0.5	2	0	0	0
0	0.5	3	0	0	0
0	0.5	4	0	0	0
0	0.5	5	0	0	0
0	0.5	6	0	0	0
0	0.5	7	0	0	0
0	0.5	8	0	0	0
0	0.5	9	0	0	0
0	0.5	10	0	0	0
0	0.5	11	0	0	0
0	0.5	12	0	1	0
0	0.5	13	0	0	0
0	0.5	14	0	0	0
0	0.5	15	0	0	0
0	0.5	16	0	1	0
0	0.5	17	0	0	0
0	0.5	18	0	0	0
0	0.5	19	0	0	0
0	0.5	20	0	0	0
0	0.5	21	0	0	0
0	0.5	22	0	1	0
0	0.5	23	0	0	0
0	0.5	24	0	0	0
0	0.5	25	0	0	0
0	0.5	26	0	1	0
0	0.5	27	0	0	0
0	0.5	28	0	0	0
0	0.5	29	0	1	0
0	0.5	30	0	0	0
0	0.5	31	0	1	0
0	0.5	32	0	0	0
0	0.5	33	0	0	0
0	0.5	34	0	1	0
0	0.5	35	0	0	0
0	0.5	36	0	0	0
0	0.5	37	0	0	0
0	0.5	38	0	0	0
0	0.5	39	0	0	0
0.5	1	1	0	0	0
0.5	1	2	0	0	1
0.5	1	3	0	0	0
0.5	1	4	0	0	0
0.5	1	5	0	0	0
0.5	1	6	0	0	0
0.5	1	7	0	0	1
0.5	1	8	0	0	0
0.5	1	9	0	0	0
0.5	1	10	0	1	0
0.5	1	11	0	0	0
0.5	1	12	0	1	0
0.5	1	13	0	0	1
0.5	1	14	0	0	0
0.5	1	15	0	0	0
0.5	1	16	0	1	0
0.5	1	17	0	0	1
0.5	1	18	0	0	0
0.5	1	19	0	1	1
0.5	1	20	0	0	0
0.5	1	21	0	0	0
0.5	1	22	0	1	0
0.5	1	23	0	0	0
0.5	1	24	0	0	1
0.5	1	25	0	0	0
0.5	1	26	0	0	0
0.5	1	27	0	0	0
0.5	1	28	0	1	1
0.5	1	29	0	0	0
0.5	1	30	0	1	0
0.5	1	31	0	0	0
0.5	1	32	0	1	1
0.5	1	33	0	1	0
0.5	1	34	0	0	1
0.5	1	35	0	0	0
0.5	1	36	0	0	0
0.5	1	37	0	0	0
0.5	1	38	0	0	0
1	1.5	1	0	0	0
1	1.5	2	0	0	1
1	1.5	3	0	0	0
1	1.5	4	0	0	0
1	1.5	5	0	0	0
1	1.5	6	0	0	1
1	1.5	7	0	0	1
1	1.5	8	0	0	0
1	1.5	9	0	0	0
1	1.5	10	0	1	0
1	1.5	11	0	0	0
1	1.5	12	0	1	0
1	1.5	13	0	0	1
1	1.5	14	0	0	0
1	1.5	15	0	0	0
1	1.5	16	0	0	0
1	1.5	17	0	0	1
1	1.5	18	0	0	0
1	1.5	19	0	1	1
1	1.5	20	0	0	1
1	1.5	21	0	0	0
1	1.5	22	0	1	0
1	1.5	23	0	0	0
1	1.5	24	0	0	1
1	1.5	25	0	0	0
1	1.5	26	0	1	0
1	1.5	27	0	0	0
1	1.5	28	0	0	0
1	1.5	29	0	1	1
1	1.5	30	0	0	0
1	1.5	31	0	1	0
1	1.5	32	0	1	0
1	1.5	33	0	1	1
1	1.5	34	0	1	0
1	1.5	35	0	0	1
1	1.5	36	0	0	0
1	1.5	37	0	0	0
1	1.5	38	0	0	1
1	1.5	39	0	0	0
1.5	2	1	0	0	0
1.5	2	2	0	0	1
1.5	2	3	0	0	1
1.5	2	4	0	0	0
1.5	2	5	0	0	0
1.5	2	6	0	0	1
1.5	2	7	0	0	1
1.5	2	8	0	0	1
1.5	2	9	0	0	0
1.5	2	10	0	1	0
1.5	2	11	0	0	0
1.5	2	12	0	1	0
1.5	2	13	0	0	1
1.5	2	14	0	0	1
1.5	2	15	0	0	1
1.5	2	16	0	0	0
1.5	2	17	0	0	1
1.5	2	18	0	0	0
1.5	2	19	0	1	0
1.5	2	20	0	0	1
1.5	2	21	0	0	0
1.5	2	22	0	1	0
1.5	2	23	0	0	0
1.5	2	24	0	0	1
1.5	2	25	0	0	0
1.5	2	26	0	1	0
1.5	2	27	0	0	1
1.5	2	28	0	0	0
1.5	2	29	0	1	0
1.5	2	30	0	0	0
1.5	2	31	0	0	0
1.5	2	32	0	1	0
1.5	2	33	0	1	1
1.5	2	34	0	1	0
1.5	2	35	0	0	1
1.5	2	36	0	0	0
1.5	2	37	0	0	1
1.5	2	38	0	0	1
1.5	2	39	0	1	0
2	2.5	1	0	0	0
2	2.5	2	0	0	1
2	2.5	3	0	0	1
2	2.5	4	0	0	0
2	2.5	5	0	0	0
2	2.5	6	0	0	1
2	2.5	7	0	0	1
2	2.5	8	0	0	1
2	2.5	9	0	0	0
2	2.5	10	0	1	0
2	2.5	11	0	0	0
2	2.5	12	0	1	0
2	2.5	13	0	0	1
2	2.5	14	0	0	1
2	2.5	15	0	0	1
2	2.5	16	0	1	0
2	2.5	17	0	0	1
2	2.5	18	0	0	0
2	2.5	19	0	0	1
2	2.5	20	0	0	1
2	2.5	21	0	0	0
2	2.5	22	0	1	0
2	2.5	23	0	0	1
2	2.5	24	0	1	1
2	2.5	25	0	0	1
2	2.5	26	0	0	1
2	2.5	27	0	0	1
2	2.5	28	0	0	1
2	2.5	29	0	1	0
2	2.5	30	0	0	0
2	2.5	31	0	0	1
2	2.5	32	0	0	1
2	2.5	33	0	0	1
2	2.5	34	0	1	0
2	2.5	35	0	0	1
2	2.5	36	0	0	1
2	2.5	37	0	0	1
2	2.5	38	0	0	0
2	2.5	39	0	0	1
2.5	3	1	0	0	1
2.5	3	2	0	0	1
2.5	3	3	0	0	1
2.5	3	4	0	0	1
2.5	3	5	0	0	1
2.5	3	6	0	0	1
2.5	3	7	0	0	1
2.5	3	8	0	0	1
2.5	3	9	0	0	1
2.5	3	10	0	1	0
2.5	3	11	0	0	1
2.5	3	12	0	1	0
2.5	3	13	0	0	1
2.5	3	14	0	0	1
2.5	3	15	0	0	1
2.5	3	16	0	1	0
2.5	3	17	0	0	1
2.5	3	18	0	0	1
2.5	3	19	0	0	1
2.5	3	20	0	0	1
2.5	3	21	0	0	0
2.5	3	22	1	1	0
2.5	3	23	0	0	1
2.5	3	24	0	1	0
2.5	3	25	0	0	1
2.5	3	26	0	0	1
2.5	3	27	0	0	1
2.5	3	28	0	0	1
2.5	3	29	0	1	0
2.5	3	30	0	0	0
2.5	3	31	0	0	1
2.5	3	32	0	1	1
2.5	3	33	0	1	1
2.5	3	34	0	0	1
2.5	3	35	0	0	1
2.5	3	36	0	0	1
2.5	3	37	0	0	1
2.5	3	38	0	0	0
2.5	3	39	0	0	1
3	3.5	1	0	0	1
3	3.5	2	0	0	1
3	3.5	3	0	0	1
3	3.5	4	0	0	1
3	3.5	5	0	0	1
3	3.5	6	0	0	1
3	3.5	7	0	0	1
3	3.5	8	0	0	1
3	3.5	9	0	0	1
3	3.5	10	0	0	0
3	3.5	11	0	1	1
3	3.5	12	0	1	0
3	3.5	13	0	1	1
3	3.5	14	0	0	0
3	3.5	15	0	0	1
3	3.5	16	0	1	0
3	3.5	17	0	0	1
3	3.5	18	0	1	1
3	3.5	19	0	0	1
3	3.5	20	0	0	1
3	3.5	21	0	0	0
3	3.5	22	0	1	0
3	3.5	23	0	0	1
3	3.5	24	0	1	0
3	3.5	25	0	0	1
3	3.5	26	0	1	1
3	3.5	27	0	1	1
3	3.5	28	0	0	1
3	3.5	29	0	1	0
3	3.5	30	0	0	1
3	3.5	31	0	0	1
3	3.5	32	0	1	1
3	3.5	33	0	1	0
3	3.5	34	0	0	1
3	3.5	35	0	0	1
3	3.5	36	0	0	1
3	3.5	37	0	0	1
3	3.5	38	0	0	0
3	3.5	39	0	1	1
3.5	4	1	0	0	1
3.5	4	2	0	0	1
3.5	4	3	0	0	1
3.5	4	4	0	0	1
3.5	4	5	0	0	0
3.5	4	6	0	0	1
3.5	4	7	0	0	1
3.5	4	8	0	0	1
3.5	4	9	0	0	1
3.5	4	10	0	0	0
3.5	4	11	0	1	1
3.5	4	12	0	1	0
3.5	4	13	0	1	1
3.5	4	14	0	0	1
3.5	4	15	0	0	1
3.5	4	16	0	1	1
3.5	4	17	0	1	1
3.5	4	18	0	0	1
3.5	4	19	0	0	1
3.5	4	20	0	0	1
3.5	4	21	0	1	0
3.5	4	22	0	0	1
3.5	4	23	0	1	0
3.5	4	24	0	0	1
3.5	4	25	0	1	1
3.5	4	26	0	0	1
3.5	4	27	0	0	1
3.5	4	28	0	1	0
3.5	4	29	0	0	1
3.5	4	30	0	1	0
3.5	4	31	0	0	1
3.5	4	32	0	1	0
3.5	4	33	0	0	1
3.5	4	34	0	0	1
3.5	4	35	0	0	1
3.5	4	36	0	0	1
3.5	4	37	0	0	0
3.5	4	38	0	0	1
4	4.5	1	0	0	1
4	4.5	2	0	0	1
4	4.5	3	0	0	1
4	4.5	4	0	0	1
4	4.5	5	0	0	1
4	4.5	6	0	0	1
4	4.5	7	0	0	1
4	4.5	8	0	0	1
4	4.5	9	0	0	1
4	4.5	10	0	0	0
4	4.5	11	0	0	1
4	4.5	12	0	1	0
4	4.5	13	0	0	1
4	4.5	14	0	0	1
4	4.5	15	0	0	1
4	4.5	16	0	1	0
4	4.5	17	0	1	0
4	4.5	18	0	0	1
4	4.5	19	0	0	1
4	4.5	20	0	0	1
4	4.5	21	0	0	1
4	4.5	22	0	1	0
4	4.5	23	0	0	1
4	4.5	24	0	1	0
4	4.5	25	0	0	1
4	4.5	26	0	0	1
4	4.5	27	0	0	1
4	4.5	28	0	0	1
4	4.5	29	0	1	0
4	4.5	30	0	0	0
4	4.5	31	0	1	0
4	4.5	32	0	0	1
4	4.5	33	0	1	0
4	4.5	34	0	0	0
4	4.5	35	0	0	1
4	4.5	36	0	0	1
4	4.5	37	0	0	1
4	4.5	38	0	0	0
4	4.5	39	0	0	1
4.5	5	1	0	0	1
4.5	5	2	0	0	1
4.5	5	3	0	0	1
4.5	5	4	0	0	1
4.5	5	5	0	0	0
4.5	5	6	0	1	1
4.5	5	7	0	1	0
4.5	5	8	0	0	1
4.5	5	9	0	0	1
4.5	5	10	0	0	1
4.5	5	11	0	0	1
4.5	5	12	0	0	0
4.5	5	13	0	0	1
4.5	5	14	0	0	0
4.5	5	15	0	0	1
4.5	5	16	0	1	0
4.5	5	17	0	1	1
4.5	5	18	0	0	1
4.5	5	19	0	0	1
4.5	5	20	0	0	1
4.5	5	21	0	0	1
4.5	5	22	0	1	0
4.5	5	23	0	0	1
4.5	5	24	0	0	1
4.5	5	25	0	0	1
4.5	5	26	0	0	1
4.5	5	27	0	0	1
4.5	5	28	0	0	1
4.5	5	29	0	1	0
4.5	5	30	0	0	1
4.5	5	31	0	0	1
4.5	5	32	0	0	1
4.5	5	33	0	1	1
4.5	5	34	0	0	1
4.5	5	35	0	0	1
4.5	5	36	0	0	1
4.5	5	37	0	0	1
4.5	5	38	0	0	0
4.5	5	39	0	1	1
5	5.5	1	0	0	1
5	5.5	2	0	0	1
5	5.5	3	0	0	1
5	5.5	4	0	0	1
5	5.5	5	0	0	1
5	5.5	6	0	0	1
5	5.5	7	0	1	0
5	5.5	8	0	0	0
5	5.5	9	0	0	0
5	5.5	10	0	1	1
5	5.5	11	0	0	1
5	5.5	12	1	1	0
5	5.5	13	0	0	1
5	5.5	14	0	0	1
5	5.5	15	0	0	0
5	5.5	16	0	1	0
5	5.5	17	0	1	1
5	5.5	18	0	0	1
5	5.5	19	0	1	1
5	5.5	20	0	0	1
5	5.5	21	0	0	1
5	5.5	22	0	1	0
5	5.5	23	0	0	1
5	5.5	24	0	0	1
5	5.5	25	0	1	1
5	5.5	26	0	0	1
5	5.5	27	0	0	1
5	5.5	28	0	0	1
5	5.5	29	0	1	0
5	5.5	30	0	0	1
5	5.5	31	0	1	1
5	5.5	32	0	0	1
5	5.5	33	0	1	1
5	5.5	34	0	0	1
5	5.5	35	0	0	1
5	5.5	36	0	0	1
5	5.5	37	0	0	0
5	5.5	38	0	0	0
5	5.5	39	0	1	1
5.5	6	1	0	0	1
5.5	6	2	0	0	1
5.5	6	3	0	0	1
5.5	6	4	0	0	1
5.5	6	5	0	0	0
5.5	6	6	0	0	1
5.5	6	7	1	1	0
5.5	6	8	0	0	0
5.5	6	9	0	0	0
5.5	6	10	0	0	1
5.5	6	11	0	0	1
5.5	6	12	1	1	0
5.5	6	13	0	0	1
5.5	6	14	0	0	1
5.5	6	15	0	1	1
5.5	6	16	0	0	1
5.5	6	17	0	0	1
5.5	6	18	0	0	1
5.5	6	19	1	1	0
5.5	6	20	0	1	1
5.5	6	21	0	0	1
5.5	6	22	0	1	1
5.5	6	23	0	1	1
5.5	6	24	0	0	1
5.5	6	25	0	0	1
5.5	6	26	0	0	1
5.5	6	27	0	1	0
5.5	6	28	0	0	0
5.5	6	29	0	1	1
5.5	6	30	0	0	1
5.5	6	31	0	0	0
5.5	6	32	0	0	1
5.5	6	33	0	0	1
5.5	6	34	0	0	1
5.5	6	35	0	1	0
5.5	6	36	0	0	0
5.5	6	37	0	1	1
6	6.5	1	0	0	1
6	6.5	2	0	0	1
6	6.5	3	0	0	1
6	6.5	4	0	0	1
6	6.5	5	0	0	1
6	6.5	6	0	0	1
6	6.5	7	0	1	0
6	6.5	8	0	0	1
6	6.5	9	0	0	1
6	6.5	10	0	0	1
6	6.5	11	0	0	1
6	6.5	12	0	1	0
6	6.5	13	0	0	1
6	6.5	14	0	0	0
6	6.5	15	0	1	0
6	6.5	16	0	0	1
6	6.5	17	0	0	1
6	6.5	18	0	0	1
6	6.5	19	1	1	0
6	6.5	20	0	0	1
6	6.5	21	0	0	1
6	6.5	22	0	1	1
6	6.5	23	0	0	1
6	6.5	24	0	1	0
6	6.5	25	0	1	1
6	6.5	26	0	0	1
6	6.5	27	0	1	0
6	6.5	28	0	0	1
6	6.5	29	0	0	0
6	6.5	30	0	0	0
6	6.5	31	0	0	1
6	6.5	32	0	0	1
6	6.5	33	0	1	0
6	6.5	34	0	0	1
6	6.5	35	0	0	1
6	6.5	36	0	0	1
6	6.5	37	0	1	0
6	6.5	38	0	0	1
6	6.5	39	0	0	1
6.5	7	1	0	0	1
6.5	7	2	0	0	1
6.5	7	3	0	0	1
6.5	7	4	0	0	1
6.5	7	5	0	0	0
6.5	7	6	0	0	1
6.5	7	7	0	1	0
6.5	7	8	0	0	1
6.5	7	9	0	0	1
6.5	7	10	0	1	1
6.5	7	11	0	0	1
6.5	7	12	0	1	0
6.5	7	13	0	0	1
6.5	7	14	0	0	0
6.5	7	15	0	1	1
6.5	7	16	0	0	1
6.5	7	17	0	0	1
6.5	7	18	0	0	1
6.5	7	19	1	1	0
6.5	7	20	0	0	1
6.5	7	21	0	0	1
6.5	7	22	0	0	1
6.5	7	23	0	0	1
6.5	7	24	0	1	0
6.5	7	25	0	0	1
6.5	7	26	0	0	1
6.5	7	27	0	1	0
6.5	7	28	0	0	1
6.5	7	29	0	0	0
6.5	7	30	0	0	0
6.5	7	31	0	0	1
6.5	7	32	0	0	1
6.5	7	33	0	1	0
6.5	7	34	0	0	1
6.5	7	35	0	0	1
6.5	7	36	0	0	1
6.5	7	37	0	1	0
6.5	7	38	0	0	1
6.5	7	39	0	0	1
7	7.5	1	0	0	1
7	7.5	2	0	0	1
7	7.5	3	0	0	1
7	7.5	4	0	0	1
7	7.5	5	0	0	1
7	7.5	6	0	0	1
7	7.5	7	0	0	1
7	7.5	8	0	0	1
7	7.5	9	0	0	0
7	7.5	10	0	1	0
7	7.5	11	0	0	1
7	7.5	12	0	0	0
7	7.5	13	0	0	1
7	7.5	14	0	0	0
7	7.5	15	0	0	1
7	7.5	16	0	0	1
7	7.5	17	0	0	1
7	7.5	18	0	0	1
7	7.5	19	0	1	0
7	7.5	20	0	1	1
7	7.5	21	0	0	1
7	7.5	22	0	0	0
7	7.5	23	0	0	1
7	7.5	24	0	1	0
7	7.5	25	0	0	1
7	7.5	26	0	0	1
7	7.5	27	1	1	0
7	7.5	28	0	0	1
7	7.5	29	0	0	0
7	7.5	30	0	0	1
7	7.5	31	0	1	1
7	7.5	32	0	0	1
7	7.5	33	0	1	0
7	7.5	34	0	0	1
7	7.5	35	0	0	1
7	7.5	36	0	0	1
7	7.5	37	0	1	0
7	7.5	38	0	0	0
7	7.5	39	0	1	1
7.5	8	1	0	0	1
7.5	8	2	0	0	1
7.5	8	3	0	0	1
7.5	8	4	0	0	1
7.5	8	5	0	0	0
7.5	8	6	0	0	1
7.5	8	7	0	0	1
7.5	8	8	0	0	1
7.5	8	9	0	0	1
7.5	8	10	0	1	0
7.5	8	11	0	0	1
7.5	8	12	0	0	0
7.5	8	13	0	1	1
7.5	8	14	0	0	0
7.5	8	15	0	0	1
7.5	8	16	0	0	1
7.5	8	17	0	0	1
7.5	8	18	0	0	1
7.5	8	19	0	0	0
7.5	8	20	0	1	1
7.5	8	21	0	0	1
7.5	8	22	0	0	0
7.5	8	23	0	1	1
7.5	8	24	0	1	0
7.5	8	25	0	0	1
7.5	8	26	0	0	1
7.5	8	27	0	0	0
7.5	8	28	0	1	1
7.5	8	29	0	1	0
7.5	8	30	0	0	1
7.5	8	31	0	1	1
7.5	8	32	0	0	1
7.5	8	33	0	1	0
7.5	8	34	0	0	1
7.5	8	35	0	0	1
7.5	8	36	0	0	1
7.5	8	37	0	1	0
7.5	8	38	0	1	0
8	8.5	1	0	0	1
8	8.5	2	0	0	1
8	8.5	3	0	0	1
8	8.5	4	0	0	1
8	8.5	5	0	0	1
8	8.5	6	0	0	1
8	8.5	7	0	0	1
8	8.5	8	0	0	1
8	8.5	9	0	0	1
8	8.5	10	0	1	0
8	8.5	11	0	0	1
8	8.5	12	0	0	1
8	8.5	13	0	1	0
8	8.5	14	0	0	0
8	8.5	15	0	0	1
8	8.5	16	0	0	0
8	8.5	17	0	1	1
8	8.5	18	0	0	1
8	8.5	19	0	0	1
8	8.5	20	0	1	1
8	8.5	21	0	0	1
8	8.5	22	0	0	0
8	8.5	23	0	1	0
8	8.5	24	0	1	0
8	8.5	25	0	0	1
8	8.5	26	0	0	1
8	8.5	27	0	0	0
8	8.5	28	0	1	1
8	8.5	29	0	1	0
8	8.5	30	0	0	0
8	8.5	31	0	1	1
8	8.5	32	0	0	1
8	8.5	33	0	1	0
8	8.5	34	0	0	1
8	8.5	35	0	0	1
8	8.5	36	0	0	1
8	8.5	37	0	1	0
8	8.5	38	0	0	1
8	8.5	39	0	1	0
8.5	9	1	0	0	1
8.5	9	2	0	0	1
8.5	9	3	0	0	1
8.5	9	4	0	0	1
8.5	9	5	0	0	1
8.5	9	6	0	0	1
8.5	9	7	0	0	1
8.5	9	8	0	0	1
8.5	9	9	0	0	1
8.5	9	10	0	1	0
8.5	9	11	0	0	1
8.5	9	12	0	1	1
8.5	9	13	0	1	0
8.5	9	14	0	0	1
8.5	9	15	0	0	1
8.5	9	16	0	1	0
8.5	9	17	0	1	1
8.5	9	18	0	0	1
8.5	9	19	0	0	1
8.5	9	20	0	1	1
8.5	9	21	0	0	1
8.5	9	22	0	0	0
8.5	9	23	0	1	1
8.5	9	24	0	1	0
8.5	9	25	0	0	1
8.5	9	26	0	0	1
8.5	9	27	0	0	1
8.5	9	28	0	0	1
8.5	9	29	0	1	0
8.5	9	30	0	0	1
8.5	9	31	0	0	1
8.5	9	32	0	1	1
8.5	9	33	0	1	0
8.5	9	34	0	0	1
8.5	9	35	0	0	1
8.5	9	36	0	0	1
8.5	9	37	0	0	0
8.5	9	38	0	0	1
8.5	9	39	0	1	1
9	9.5	1	0	0	1
9	9.5	2	0	0	1
9	9.5	3	0	0	1
9	9.5	4	0	0	1
9	9.5	5	0	0	1
9	9.5	6	0	0	1
9	9.5	7	0	0	1
9	9.5	8	0	0	1
9	9.5	9	0	0	1
9	9.5	10	0	1	1
9	9.5	11	0	1	1
9	9.5	12	0	1	1
9	9.5	13	0	1	1
9	9.5	14	0	0	0
9	9.5	15	0	0	1
9	9.5	16	0	1	0
9	9.5	17	0	0	1
9	9.5	18	0	0	1
9	9.5	19	0	0	1
9	9.5	20	0	0	1
9	9.5	21	0	0	1
9	9.5	22	0	1	0
9	9.5	23	0	1	1
9	9.5	24	0	1	0
9	9.5	25	0	0	1
9	9.5	26	0	0	1
9	9.5	27	0	0	1
9	9.5	28	0	0	1
9	9.5	29	0	1	1
9	9.5	30	0	0	1
9	9.5	31	0	0	0
9	9.5	32	0	1	1
9	9.5	33	0	0	0
9	9.5	34	0	0	1
9	9.5	35	0	0	1
9	9.5	36	0	0	1
9	9.5	37	0	0	1
9	9.5	38	0	1	1
9	9.5	39	0	0	1
9.5	10	1	0	0	0
9.5	10	2	0	0	1
9.5	10	3	0	0	1
9.5	10	4	0	0	1
9.5	10	5	0	0	1
9.5	10	6	0	0	1
9.5	10	7	0	0	1
9.5	10	8	0	0	0
9.5	10	9	0	0	1
9.5	10	10	0	1	1
9.5	10	11	0	1	1
9.5	10	12	0	0	0
9.5	10	13	0	0	1
9.5	10	14	0	0	0
9.5	10	15	0	0	1
9.5	10	16	0	1	1
9.5	10	17	0	0	1
9.5	10	18	0	0	1
9.5	10	19	0	1	1
9.5	10	20	0	0	1
9.5	10	21	0	1	0
9.5	10	22	0	0	1
9.5	10	23	0	1	0
9.5	10	24	0	1	1
9.5	10	25	0	0	1
9.5	10	26	0	0	1
9.5	10	27	0	0	1
9.5	10	28	0	1	1
9.5	10	29	0	0	0
9.5	10	30	0	1	1
9.5	10	31	0	0	1
9.5	10	32	0	1	0
9.5	10	33	0	0	1
9.5	10	34	0	0	1
9.5	10	35	0	0	1
9.5	10	36	0	0	0
9.5	10	37	0	1	0
9.5	10	38	0	0	1
10	10.5	1	0	0	1
10	10.5	2	0	0	1
10	10.5	3	0	0	1
10	10.5	4	0	0	1
10	10.5	5	0	0	1
10	10.5	6	0	0	1
10	10.5	7	0	0	1
10	10.5	8	0	0	1
10	10.5	9	0	0	1
10	10.5	10	0	0	1
10	10.5	11	0	0	1
10	10.5	12	0	0	0
10	10.5	13	0	0	1
10	10.5	14	0	0	1
10	10.5	15	0	0	1
10	10.5	16	0	1	1
10	10.5	17	0	0	1
10	10.5	18	0	1	1
10	10.5	19	0	0	1
10	10.5	20	0	0	1
10	10.5	21	0	0	1
10	10.5	22	0	1	0
10	10.5	23	0	0	1
10	10.5	24	1	1	0
10	10.5	25	0	1	1
10	10.5	26	0	0	1
10	10.5	27	0	1	1
10	10.5	28	0	0	1
10	10.5	29	0	0	0
10	10.5	30	0	0	1
10	10.5	31	0	1	1
10	10.5	32	0	0	1
10	10.5	33	0	1	0
10	10.5	34	0	0	1
10	10.5	35	0	0	1
10	10.5	36	0	0	1
10	10.5	37	0	1	0
10	10.5	38	0	0	1
10.5	11	1	0	0	0
10.5	11	2	0	0	1
10.5	11	3	0	0	1
10.5	11	4	0	0	1
10.5	11	5	0	0	1
10.5	11	6	0	0	1
10.5	11	7	0	0	1
10.5	11	8	0	0	1
10.5	11	9	0	0	0
10.5	11	10	0	0	1
10.5	11	11	0	0	1
10.5	11	12	0	0	0
10.5	11	13	0	1	1
10.5	11	14	0	0	0
10.5	11	15	0	1	1
10.5	11	16	0	1	1
10.5	11	17	0	0	1
10.5	11	18	0	1	0
10.5	11	19	0	0	1
10.5	11	20	0	0	1
10.5	11	21	0	1	0
10.5	11	22	0	1	0
10.5	11	23	0	0	1
10.5	11	24	0	1	0
10.5	11	25	0	0	1
10.5	11	26	0	0	1
10.5	11	27	0	1	1
10.5	11	28	0	0	1
10.5	11	29	0	0	0
10.5	11	30	0	0	1
10.5	11	31	0	1	0
10.5	11	32	0	0	1
10.5	11	33	0	1	0
10.5	11	34	0	0	0
10.5	11	35	0	0	1
10.5	11	36	0	0	1
10.5	11	37	0	1	0
10.5	11	38	0	0	1
10.5	11	39	0	0	1
11	11.5	1	0	0	1
11	11.5	2	0	0	1
11	11.5	3	0	0	1
11	11.5	4	0	0	1
11	11.5	5	0	0	1
11	11.5	6	0	0	1
11	11.5	7	0	1	1
11	11.5	8	0	0	1
11	11.5	9	0	0	1
11	11.5	10	0	0	1
11	11.5	11	0	0	1
11	11.5	12	0	0	0
11	11.5	13	0	1	0
11	11.5	14	0	0	0
11	11.5	15	0	0	1
11	11.5	16	0	0	1
11	11.5	17	0	0	1
11	11.5	18	0	0	0
11	11.5	19	0	0	1
11	11.5	20	0	0	1
11	11.5	21	0	1	0
11	11.5	22	0	1	0
11	11.5	23	0	0	1
11	11.5	24	0	0	1
11	11.5	25	0	0	1
11	11.5	26	0	0	1
11	11.5	27	0	0	0
11	11.5	28	0	0	0
11	11.5	29	0	1	0
11	11.5	30	0	0	1
11	11.5	31	0	1	0
11	11.5	32	0	0	1
11	11.5	33	0	0	1
11	11.5	34	0	0	1
11	11.5	35	0	1	0
11	11.5	36	0	0	1
11	11.5	37	0	0	1
11.5	12	1	0	0	1
11.5	12	2	0	0	1
11.5	12	3	0	0	1
11.5	12	4	0	0	1
11.5	12	5	0	0	1
11.5	12	6	0	1	0
11.5	12	7	0	1	0
11.5	12	8	0	0	1
11.5	12	9	0	0	1
11.5	12	10	0	0	1
11.5	12	11	0	0	1
11.5	12	12	0	1	0
11.5	12	13	0	1	0
11.5	12	14	0	0	1
11.5	12	15	0	0	1
11.5	12	16	0	0	1
11.5	12	17	0	0	1
11.5	12	18	0	0	0
11.5	12	19	0	0	1
11.5	12	20	0	0	1
11.5	12	21	0	0	1
11.5	12	22	0	1	0
11.5	12	23	0	0	0
11.5	12	24	0	1	0
11.5	12	25	0	0	1
11.5	12	26	0	0	1
11.5	12	27	0	0	1
11.5	12	28	0	0	1
11.5	12	29	0	0	0
11.5	12	30	0	0	0
11.5	12	31	0	1	0
11.5	12	32	0	0	1
11.5	12	33	0	1	0
11.5	12	34	0	0	1
11.5	12	35	0	0	1
11.5	12	36	0	0	1
11.5	12	37	0	1	0
11.5	12	38	0	0	1
11.5	12	39	0	0	1
12	12.5	1	0	0	1
12	12.5	2	0	0	1
12	12.5	3	0	0	1
12	12.5	4	0	0	1
12	12.5	5	0	0	1
12	12.5	6	0	1	1
12	12.5	7	0	1	1
12	12.5	8	0	0	1
12	12.5	9	0	0	1
12	12.5	10	0	1	0
12	12.5	11	0	0	1
12	12.5	12	0	1	0
12	12.5	13	0	1	0
12	12.5	14	0	0	0
12	12.5	15	0	0	1
12	12.5	16	0	0	1
12	12.5	17	0	1	1
12	12.5	18	0	0	1
12	12.5	19	0	0	1
12	12.5	20	0	0	1
12	12.5	21	0	1	0
12	12.5	22	0	0	0
12	12.5	23	0	0	0
12	12.5	24	0	1	1
12	12.5	25	0	0	1
12	12.5	26	0	1	1
12	12.5	27	0	0	1
12	12.5	28	0	0	0
12	12.5	29	0	0	1
12	12.5	30	1	1	0
12	12.5	31	0	0	1
12	12.5	32	0	1	1
12	12.5	33	0	0	1
12	12.5	34	0	0	1
12	12.5	35	0	0	1
12	12.5	36	0	0	0
12	12.5	37	0	0	0
12	12.5	38	0	0	1
12.5	13	1	0	0	1
12.5	13	2	0	0	1
12.5	13	3	0	0	1
12.5	13	4	0	0	1
12.5	13	5	0	0	1
12.5	13	6	0	1	1
12.5	13	7	0	1	1
12.5	13	8	0	0	1
12.5	13	9	0	0	1
12.5	13	10	0	1	0
12.5	13	11	0	0	1
12.5	13	12	0	1	0
12.5	13	13	0	1	0
12.5	13	14	0	0	1
12.5	13	15	0	0	1
12.5	13	16	0	0	1
12.5	13	17	0	1	1
12.5	13	18	0	0	1
12.5	13	19	0	1	1
12.5	13	20	0	0	1
12.5	13	21	0	1	1
12.5	13	22	0	1	0
12.5	13	23	0	0	0
12.5	13	24	0	1	1
12.5	13	25	0	0	1
12.5	13	26	0	1	0
12.5	13	27	0	0	1
12.5	13	28	0	0	0
12.5	13	29	0	0	1
12.5	13	30	0	1	0
12.5	13	31	0	0	1
12.5	13	32	0	1	1
12.5	13	33	0	0	1
12.5	13	34	0	0	1
12.5	13	35	0	0	1
12.5	13	36	0	0	0
12.5	13	37	0	1	0
12.5	13	38	0	0	1
13	13.5	1	0	0	1
13	13.5	2	0	0	1
13	13.5	3	0	0	1
13	13.5	4	0	0	1
13	13.5	5	0	0	1
13	13.5	6	0	0	1
13	13.5	7	0	0	1
13	13.5	8	0	0	1
13	13.5	9	0	0	1
13	13.5	10	0	1	0
13	13.5	11	0	0	1
13	13.5	12	0	1	0
13	13.5	13	0	1	0
13	13.5	14	0	0	1
13	13.5	15	0	0	1
13	13.5	16	0	0	1
13	13.5	17	0	0	1
13	13.5	18	0	1	0
13	13.5	19	0	1	1
13	13.5	20	0	0	1
13	13.5	21	0	1	1
13	13.5	22	0	1	0
13	13.5	23	0	0	0
13	13.5	24	0	0	1
13	13.5	25	0	1	0
13	13.5	26	0	0	1
13	13.5	27	0	0	0
13	13.5	28	0	0	0
13	13.5	29	0	1	0
13	13.5	30	0	1	1
13	13.5	31	0	1	0
13	13.5	32	0	0	1
13	13.5	33	0	0	1
13	13.5	34	0	0	1
13	13.5	35	0	0	0
13	13.5	36	0	1	0
13	13.5	37	0	1	1
13.5	14	1	0	0	1
13.5	14	2	0	0	1
13.5	14	3	0	0	1
13.5	14	4	0	0	1
13.5	14	5	0	0	1
13.5	14	6	0	0	1
13.5	14	7	0	0	1
13.5	14	8	0	0	1
13.5	14	9	0	0	0
13.5	14	10	0	1	1
13.5	14	11	0	0	1
13.5	14	12	0	1	0
13.5	14	13	0	1	0
13.5	14	14	0	0	0
13.5	14	15	0	0	1
13.5	14	16	0	0	1
13.5	14	17	0	0	1
13.5	14	18	0	1	0
13.5	14	19	0	0	1
13.5	14	20	0	0	1
13.5	14	21	0	0	0
13.5	14	22	0	1	0
13.5	14	23	0	0	0
13.5	14	24	0	1	0
13.5	14	25	0	1	1
13.5	14	26	0	1	1
13.5	14	27	0	0	1
13.5	14	28	0	0	0
13.5	14	29	0	0	1
13.5	14	30	0	1	0
13.5	14	31	0	1	1
13.5	14	32	0	1	0
13.5	14	33	0	0	1
13.5	14	34	0	0	1
13.5	14	35	0	0	1
13.5	14	36	0	1	0
13.5	14	37	0	0	0
13.5	14	38	0	1	1
14	14.5	1	0	0	1
14	14.5	2	0	0	1
14	14.5	3	0	0	1
14	14.5	4	0	0	1
14	14.5	5	0	0	1
14	14.5	6	0	1	1
14	14.5	7	0	0	1
14	14.5	8	0	0	0
14	14.5	9	0	0	1
14	14.5	10	0	0	1
14	14.5	11	0	0	1
14	14.5	12	0	1	0
14	14.5	13	0	1	0
14	14.5	14	0	0	0
14	14.5	15	0	1	1
14	14.5	16	0	0	1
14	14.5	17	0	0	1
14	14.5	18	0	1	0
14	14.5	19	0	0	1
14	14.5	20	0	0	0
14	14.5	21	0	0	0
14	14.5	22	0	0	1
14	14.5	23	0	0	0
14	14.5	24	0	0	0
14	14.5	25	0	1	0
14	14.5	26	0	0	1
14	14.5	27	0	0	1
14	14.5	28	0	0	0
14	14.5	29	0	0	1
14	14.5	30	0	1	1
14	14.5	31	0	1	1
14	14.5	32	0	1	0
14	14.5	33	0	0	1
14	14.5	34	0	0	1
14	14.5	35	0	0	1
14	14.5	36	0	1	0
14	14.5	37	0	0	0
14	14.5	38	0	1	0
14.5	15	1	0	0	1
14.5	15	2	0	0	1
14.5	15	3	0	0	1
14.5	15	4	0	0	1
14.5	15	5	0	0	1
14.5	15	6	0	1	1
14.5	15	7	0	0	1
14.5	15	8	0	0	1
14.5	15	9	0	0	1
14.5	15	10	0	0	1
14.5	15	11	0	0	1
14.5	15	12	0	1	1
14.5	15	13	0	1	0
14.5	15	14	0	0	1
14.5	15	15	0	1	0
14.5	15	16	0	0	1
14.5	15	17	0	0	1
14.5	15	18	0	1	0
14.5	15	19	0	0	1
14.5	15	20	0	1	0
14.5	15	21	0	0	0
14.5	15	22	0	0	1
14.5	15	23	0	0	1
14.5	15	24	0	0	1
14.5	15	25	0	1	1
14.5	15	26	0	0	1
14.5	15	27	0	0	1
14.5	15	28	0	0	0
14.5	15	29	0	0	0
14.5	15	30	0	1	1
14.5	15	31	0	1	1
14.5	15	32	0	1	1
14.5	15	33	0	0	1
14.5	15	34	0	0	1
14.5	15	35	0	0	1
14.5	15	36	0	1	0
14.5	15	37	0	0	0
14.5	15	38	0	1	0
15	15.5	1	0	0	1
15	15.5	2	0	0	1
15	15.5	3	0	0	1
15	15.5	4	0	0	1
15	15.5	5	0	0	1
15	15.5	6	0	0	1
15	15.5	7	0	0	1
15	15.5	8	0	0	1
15	15.5	9	0	0	0
15	15.5	10	0	0	1
15	15.5	11	0	0	1
15	15.5	12	0	1	1
15	15.5	13	0	1	0
15	15.5	14	0	0	0
15	15.5	15	0	1	0
15	15.5	16	0	0	1
15	15.5	17	0	0	1
15	15.5	18	0	0	1
15	15.5	19	0	1	0
15	15.5	20	0	1	0
15	15.5	21	0	0	0
15	15.5	22	0	0	1
15	15.5	23	0	0	1
15	15.5	24	0	0	1
15	15.5	25	0	0	1
15	15.5	26	0	0	1
15	15.5	27	0	0	1
15	15.5	28	0	0	0
15	15.5	29	0	0	0
15	15.5	30	0	0	0
15	15.5	31	0	0	1
15	15.5	32	0	0	0
15	15.5	33	0	1	0
15	15.5	34	0	0	1
15	15.5	35	0	0	1
15	15.5	36	0	1	0
15	15.5	37	0	0	1
15	15.5	38	0	1	0
15.5	16	1	0	0	1
15.5	16	2	0	0	1
15.5	16	3	0	0	1
15.5	16	4	0	0	1
15.5	16	5	0	0	1
15.5	16	6	0	0	1
15.5	16	7	0	0	1
15.5	16	8	0	0	1
15.5	16	9	0	0	0
15.5	16	10	0	0	1
15.5	16	11	0	0	1
15.5	16	12	0	1	0
15.5	16	13	0	1	0
15.5	16	14	0	0	0
15.5	16	15	0	0	1
15.5	16	16	0	1	1
15.5	16	17	0	0	1
15.5	16	18	0	0	1
15.5	16	19	0	1	0
15.5	16	20	0	1	0
15.5	16	21	0	0	0
15.5	16	22	0	0	1
15.5	16	23	0	0	1
15.5	16	24	0	0	1
15.5	16	25	0	0	1
15.5	16	26	0	0	1
15.5	16	27	0	0	1
15.5	16	28	0	0	0
15.5	16	29	0	0	0
15.5	16	30	0	0	1
15.5	16	31	0	0	1
15.5	16	32	0	0	1
15.5	16	33	0	1	1
15.5	16	34	0	0	1
15.5	16	35	0	0	1
15.5	16	36	0	1	0
15.5	16	37	0	0	1
15.5	16	38	0	1	1
16	16.5	1	0	0	1
16	16.5	2	0	0	1
16	16.5	3	0	0	1
16	16.5	4	0	0	1
16	16.5	5	0	0	1
16	16.5	6	0	0	1
16	16.5	7	0	0	1
16	16.5	8	0	0	0
16	16.5	9	0	0	0
16	16.5	10	0	0	1
16	16.5	11	0	0	1
16	16.5	12	0	1	0
16	16.5	13	0	1	0
16	16.5	14	0	0	1
16	16.5	15	0	0	1
16	16.5	16	0	1	0
16	16.5	17	0	1	1
16	16.5	18	0	0	1
16	16.5	19	0	1	0
16	16.5	20	0	1	0
16	16.5	21	0	0	0
16	16.5	22	0	0	1
16	16.5	23	0	0	1
16	16.5	24	0	0	1
16	16.5	25	0	0	1
16	16.5	26	0	0	0
16	16.5	27	0	0	1
16	16.5	28	0	0	0
16	16.5	29	0	0	1
16	16.5	30	0	0	1
16	16.5	31	0	1	0
16	16.5	32	0	0	1
16	16.5	33	0	0	1
16	16.5	34	0	1	0
16	16.5	35	0	0	1
16	16.5	36	0	1	0
16	16.5	37	0	0	0
16	16.5	38	0	0	1
16.5	17	1	0	0	0
16.5	17	2	0	0	1
16.5	17	3	0	0	1
16.5	17	4	0	0	1
16.5	17	5	0	0	0
16.5	17	6	0	0	1
16.5	17	7	0	0	1
16.5	17	8	0	0	0
16.5	17	9	0	0	0
16.5	17	10	0	1	0
16.5	17	11	0	1	0
16.5	17	12	0	1	0
16.5	17	13	1	1	0
16.5	17	14	0	0	0
16.5	17	15	0	1	1
16.5	17	16	0	1	0
16.5	17	17	0	1	1
16.5	17	18	0	0	0
16.5	17	19	0	1	0
16.5	17	20	0	0	1
16.5	17	21	0	0	0
16.5	17	22	0	0	0
16.5	17	23	0	0	0
16.5	17	24	0	0	1
16.5	17	25	0	0	0
16.5	17	26	0	1	0
16.5	17	27	0	0	0
16.5	17	28	0	0	0
16.5	17	29	0	0	0
16.5	17	30	0	0	1
16.5	17	31	0	1	0
16.5	17	32	0	0	1
16.5	17	33	0	0	1
16.5	17	34	0	1	1
16.5	17	35	0	0	1
16.5	17	36	0	1	0
16.5	17	37	0	1	1
17	17.5	1	0	0	0
17	17.5	2	0	0	1
17	17.5	3	0	1	0
17	17.5	4	0	0	0
17	17.5	5	0	0	0
17	17.5	6	0	0	0
17	17.5	7	0	0	1
17	17.5	8	0	0	0
17	17.5	9	0	0	0
17	17.5	10	0	1	0
17	17.5	11	0	1	0
17	17.5	12	0	1	0
17	17.5	13	0	1	0
17	17.5	14	0	0	0
17	17.5	15	0	1	0
17	17.5	16	0	1	1
17	17.5	17	0	1	0
17	17.5	18	0	1	0
17	17.5	19	0	1	0
17	17.5	20	0	0	0
17	17.5	21	0	0	0
17	17.5	22	0	1	0
17	17.5	23	0	0	0
17	17.5	24	0	0	1
17	17.5	25	0	1	0
17	17.5	26	0	1	0
17	17.5	27	0	0	0
17	17.5	28	0	0	0
17	17.5	29	0	0	0
17	17.5	30	0	1	1
17	17.5	31	0	1	0
17	17.5	32	0	0	1
17	17.5	33	0	0	1
17	17.5	34	0	1	1
17	17.5	35	0	0	1
17	17.5	36	0	1	0
17	17.5	37	0	1	1
17.5	18	1	0	0	0
17.5	18	2	0	0	0
17.5	18	3	0	1	0
17.5	18	4	0	0	0
17.5	18	5	0	0	0
17.5	18	6	0	0	0
17.5	18	7	0	0	0
17.5	18	8	0	0	0
17.5	18	9	0	0	0
17.5	18	10	0	1	0
17.5	18	11	0	1	0
17.5	18	12	0	1	0
17.5	18	13	0	1	0
17.5	18	14	0	1	0
17.5	18	15	0	1	0
17.5	18	16	0	0	1
17.5	18	17	0	1	0
17.5	18	18	0	1	0
17.5	18	19	0	1	0
17.5	18	20	0	0	0
17.5	18	21	0	0	0
17.5	18	22	0	1	0
17.5	18	23	0	0	0
17.5	18	24	0	0	1
17.5	18	25	0	1	0
17.5	18	26	0	1	0
17.5	18	27	0	1	0
17.5	18	28	0	1	0
17.5	18	29	0	0	0
17.5	18	30	0	1	0
17.5	18	31	0	1	0
17.5	18	32	0	0	0
17.5	18	33	0	0	0
17.5	18	34	0	1	0
17.5	18	35	0	1	1
17.5	18	36	0	1	0
17.5	18	37	1	1	0
17.5	18	38	0	1	1
18	18.5	1	0	1	0
18	18.5	2	0	0	0
18	18.5	3	0	1	0
18	18.5	4	0	0	0
18	18.5	5	0	0	0
18	18.5	6	0	1	0
18	18.5	7	0	0	0
18	18.5	8	0	0	0
18	18.5	9	0	0	0
18	18.5	10	0	1	0
18	18.5	11	0	1	0
18	18.5	12	0	1	0
18	18.5	13	0	1	0
18	18.5	14	0	1	0
18	18.5	15	0	1	0
18	18.5	16	0	0	1
18	18.5	17	0	1	0
18	18.5	18	0	1	0
18	18.5	19	1	1	0
18	18.5	20	0	1	0
18	18.5	21	0	0	0
18	18.5	22	0	1	0
18	18.5	23	0	1	0
18	18.5	24	0	1	0
18	18.5	25	0	0	1
18	18.5	26	0	1	0
18	18.5	27	1	1	0
18	18.5	28	1	1	0
18	18.5	29	1	1	0
18	18.5	30	0	0	0
18	18.5	31	0	1	0
18	18.5	32	0	1	0
18	18.5	33	0	1	0
18	18.5	34	0	1	0
18	18.5	35	0	1	0
18	18.5	36	0	1	0
18	18.5	37	1	1	0
18	18.5	38	1	1	0
18	18.5	39	0	1	0
18.5	19	1	0	1	0
18.5	19	2	0	0	0
18.5	19	3	0	0	0
18.5	19	4	0	0	0
18.5	19	5	0	1	0
18.5	19	6	0	1	0
18.5	19	7	0	1	0
18.5	19	8	0	1	0
18.5	19	9	0	1	0
18.5	19	10	0	1	0
18.5	19	11	0	1	0
18.5	19	12	0	1	0
18.5	19	13	0	1	0
18.5	19	14	0	0	1
18.5	19	15	0	1	0
18.5	19	16	1	1	0
18.5	19	17	1	1	0
18.5	19	18	0	1	0
18.5	19	19	0	1	0
18.5	19	20	0	1	0
18.5	19	21	0	1	0
18.5	19	22	0	1	0
18.5	19	23	1	1	0
18.5	19	24	0	1	0
18.5	19	25	1	1	0
18.5	19	26	1	1	0
18.5	19	27	0	0	0
18.5	19	28	1	1	0
18.5	19	29	0	1	0
18.5	19	30	0	1	0
18.5	19	31	1	1	0
18.5	19	32	0	1	0
18.5	19	33	0	1	0
18.5	19	34	0	1	0
18.5	19	35	0	1	0
18.5	19	36	1	1	0
19	19.5	1	1	1	0
19	19.5	2	0	0	0
19	19.5	3	0	1	0
19	19.5	4	0	1	0
19	19.5	5	0	0	0
19	19.5	6	0	1	0
19	19.5	7	0	1	0
19	19.5	8	0	1	0
19	19.5	9	0	1	0
19	19.5	10	0	0	0
19	19.5	11	0	1	0
19	19.5	12	0	1	0
19	19.5	13	0	1	0
19	19.5	14	0	1	0
19	19.5	15	0	1	0
19	19.5	16	0	0	0
19	19.5	17	0	1	0
19	19.5	18	0	1	0
19	19.5	19	0	1	0
19	19.5	20	1	1	0
19	19.5	21	0	1	0
19	19.5	22	1	1	0
19	19.5	23	0	1	0
19	19.5	24	0	1	0
19	19.5	25	1	1	0
19	19.5	26	1	1	0
19	19.5	27	1	1	0
19	19.5	28	0	1	0
19	19.5	29	0	0	0
19	19.5	30	1	1	0
19	19.5	31	0	1	0
19	19.5	32	1	1	0
19	19.5	33	1	1	0
19	19.5	34	0	1	0
19	19.5	35	0	1	0
19	19.5	36	0	1	0
19	19.5	37	1	1	0
19	19.5	38	0	1	0
19.5	20	1	1	1	0
19.5	20	2	0	1	0
19.5	20	3	0	1	0
19.5	20	4	0	1	1
19.5	20	5	0	0	0
19.5	20	6	0	1	0
19.5	20	7	0	1	0
19.5	20	8	0	0	0
19.5	20	9	1	1	0
19.5	20	10	0	1	1
19.5	20	11	0	1	0
19.5	20	12	0	1	1
19.5	20	13	0	1	0
19.5	20	14	0	1	0
19.5	20	15	1	1	0
19.5	20	16	0	1	0
19.5	20	17	1	1	0
19.5	20	18	1	1	0
19.5	20	19	0	1	0
19.5	20	20	1	1	0
19.5	20	21	0	1	0
19.5	20	22	1	1	0
19.5	20	23	0	1	0
19.5	20	24	0	1	0
19.5	20	25	0	1	0
19.5	20	26	1	1	0
19.5	20	27	1	1	0
19.5	20	28	1	1	0
19.5	20	29	0	1	0
19.5	20	30	0	1	0
19.5	20	31	1	1	0
19.5	20	32	0	1	0
19.5	20	33	1	1	0
19.5	20	34	0	1	0
19.5	20	35	1	1	0
19.5	20	36	1	1	0
19.5	20	37	0	1	0
19.5	20	38	1	1	0
19.5	20	39	1	1	0
20	20.5	1	1	1	0
20	20.5	2	0	1	0
20	20.5	3	0	1	0
20	20.5	4	0	1	1
20	20.5	5	0	1	0
20	20.5	6	1	1	0
20	20.5	7	0	1	0
20	20.5	8	1	1	0
20	20.5	9	1	1	0
20	20.5	10	0	1	1
20	20.5	11	1	1	0
20	20.5	12	0	1	1
20	20.5	13	0	1	0
20	20.5	14	1	1	1
20	20.5	15	1	1	0
20	20.5	16	0	1	0
20	20.5	17	0	1	0
20	20.5	18	1	1	0
20	20.5	19	1	1	0
20	20.5	20	0	1	0
20	20.5	21	0	1	0
20	20.5	22	1	1	0
20	20.5	23	0	1	0
20	20.5	24	0	1	0
20	20.5	25	0	1	0
20	20.5	26	0	1	0
20	20.5	27	0	1	0
20	20.5	28	1	1	0
20	20.5	29	0	1	0
20	20.5	30	0	1	0
20	20.5	31	1	1	0
20	20.5	32	0	1	0
20	20.5	33	0	1	0
20	20.5	34	0	1	0
20	20.5	35	1	1	0
20	20.5	36	0	1	0
20	20.5	37	0	1	0
20	20.5	38	1	1	0
20	20.5	39	1	1	0
20.5	21	1	1	1	0
20.5	21	2	0	1	0
20.5	21	3	0	1	0
20.5	21	4	1	1	1
20.5	21	5	0	1	0
20.5	21	6	1	1	0
20.5	21	7	0	1	0
20.5	21	8	1	1	0
20.5	21	9	0	1	0
20.5	21	10	0	1	1
20.5	21	11	0	1	0
20.5	21	12	0	1	0
20.5	21	13	0	1	0
20.5	21	14	1	1	0
20.5	21	15	1	1	0
20.5	21	16	0	1	0
20.5	21	17	0	1	0
20.5	21	18	1	1	0
20.5	21	19	1	1	0
20.5	21	20	0	1	0
20.5	21	21	0	1	0
20.5	21	22	0	0	0
20.5	21	23	0	1	0
20.5	21	24	0	1	0
20.5	21	25	0	1	0
20.5	21	26	1	1	0
20.5	21	27	0	1	0
20.5	21	28	0	1	0
20.5	21	29	0	1	0
20.5	21	30	1	1	0
20.5	21	31	1	1	0
20.5	21	32	1	1	0
20.5	21	33	0	1	0
20.5	21	34	0	1	0
20.5	21	35	1	1	0
20.5	21	36	1	1	0
20.5	21	37	0	1	0
20.5	21	38	1	1	0
20.5	21	39	0	1	0
21	21.5	1	1	1	0
21	21.5	2	1	1	0
21	21.5	3	1	1	0
21	21.5	4	1	1	0
21	21.5	5	0	1	0
21	21.5	6	0	1	0
21	21.5	7	1	1	0
21	21.5	8	1	1	0
21	21.5	9	0	0	0
21	21.5	10	0	1	1
21	21.5	11	0	0	0
21	21.5	12	0	1	0
21	21.5	13	0	1	0
21	21.5	14	0	1	0
21	21.5	15	1	1	0
21	21.5	16	1	1	0
21	21.5	17	0	1	1
21	21.5	18	1	1	0
21	21.5	19	0	1	0
21	21.5	20	0	1	0
21	21.5	21	1	1	0
21	21.5	22	0	0	0
21	21.5	23	0	1	0
21	21.5	24	0	1	0
21	21.5	25	0	1	0
21	21.5	26	1	1	0
21	21.5	27	0	1	0
21	21.5	28	0	1	0
21	21.5	29	0	1	0
21	21.5	30	1	1	0
21	21.5	31	0	1	0
21	21.5	32	1	1	0
21	21.5	33	0	1	0
21	21.5	34	0	1	0
21	21.5	35	0	1	0
21	21.5	36	1	1	0
21	21.5	37	0	1	0
21	21.5	38	1	1	0
21	21.5	39	0	1	0
21.5	22	1	0	1	0
21.5	22	2	1	1	0
21.5	22	3	0	1	0
21.5	22	4	0	0	0
21.5	22	5	0	0	1
21.5	22	6	0	0	0
21.5	22	7	1	1	0
21.5	22	8	0	0	0
21.5	22	9	0	0	1
21.5	22	10	0	1	1
21.5	22	11	0	0	1
21.5	22	12	1	1	0
21.5	22	13	0	1	0
21.5	22	14	0	1	0
21.5	22	15	0	1	0
21.5	22	16	0	1	0
21.5	22	17	1	1	1
21.5	22	18	0	1	0
21.5	22	19	0	1	0
21.5	22	20	1	1	0
21.5	22	21	0	1	1
21.5	22	22	0	1	0
21.5	22	23	0	1	0
21.5	22	24	0	1	0
21.5	22	25	0	0	0
21.5	22	26	0	1	0
21.5	22	27	0	0	1
21.5	22	28	0	1	1
21.5	22	29	0	1	0
21.5	22	30	0	1	0
21.5	22	31	1	1	0
21.5	22	32	0	1	0
21.5	22	33	0	1	0
21.5	22	34	0	0	0
21.5	22	35	0	1	0
21.5	22	36	0	0	0
21.5	22	37	0	1	0
21.5	22	38	0	1	0
22	22.5	1	0	0	0
22	22.5	2	1	1	0
22	22.5	3	0	1	0
22	22.5	4	0	0	0
22	22.5	5	0	0	1
22	22.5	6	0	0	1
22	22.5	7	1	1	0
22	22.5	8	0	0	0
22	22.5	9	0	0	1
22	22.5	10	0	0	1
22	22.5	11	0	0	1
22	22.5	12	0	1	0
22	22.5	13	0	1	0
22	22.5	14	0	1	1
22	22.5	15	0	0	0
22	22.5	16	0	0	0
22	22.5	17	1	1	0
22	22.5	18	0	1	0
22	22.5	19	1	1	0
22	22.5	20	0	1	0
22	22.5	21	0	1	0
22	22.5	22	0	1	1
22	22.5	23	0	1	1
22	22.5	24	0	1	0
22	22.5	25	0	1	0
22	22.5	26	0	0	0
22	22.5	27	0	1	0
22	22.5	28	0	1	1
22	22.5	29	0	0	0
22	22.5	30	0	0	0
22	22.5	31	0	0	1
22	22.5	32	0	1	0
22	22.5	33	0	0	1
22	22.5	34	0	1	1
22	22.5	35	0	0	1
22	22.5	36	0	0	0
22	22.5	37	0	1	1
22	22.5	38	0	0	0
22	22.5	39	1	1	0
22.5	23	1	0	0	1
22.5	23	2	0	1	0
22.5	23	3	0	1	0
22.5	23	4	0	0	1
22.5	23	5	0	0	1
22.5	23	6	0	0	1
22.5	23	7	0	0	0
22.5	23	8	0	0	1
22.5	23	9	0	0	1
22.5	23	10	0	0	1
22.5	23	11	0	0	1
22.5	23	12	1	1	0
22.5	23	13	0	1	0
22.5	23	14	0	0	1
22.5	23	15	0	0	1
22.5	23	16	0	0	1
22.5	23	17	0	0	0
22.5	23	18	0	0	1
22.5	23	19	1	1	0
22.5	23	20	0	1	0
22.5	23	21	0	0	0
22.5	23	22	0	0	0
22.5	23	23	0	1	0
22.5	23	24	0	1	0
22.5	23	25	0	0	1
22.5	23	26	0	0	1
22.5	23	27	0	1	0
22.5	23	28	0	1	1
22.5	23	29	0	1	0
22.5	23	30	0	0	0
22.5	23	31	0	1	1
22.5	23	32	0	0	0
22.5	23	33	0	1	1
22.5	23	34	0	1	1
22.5	23	35	0	0	1
22.5	23	36	0	0	1
22.5	23	37	0	0	1
22.5	23	38	0	1	1
22.5	23	39	0	1	0
23	23.5	1	0	0	1
23	23.5	2	0	0	0
23	23.5	3	0	0	1
23	23.5	4	0	0	1
23	23.5	5	0	0	0
23	23.5	6	0	0	0
23	23.5	7	0	0	1
23	23.5	8	0	0	1
23	23.5	9	0	0	1
23	23.5	10	0	0	1
23	23.5	11	1	1	0
23	23.5	12	0	1	0
23	23.5	13	0	0	1
23	23.5	14	0	0	1
23	23.5	15	0	0	1
23	23.5	16	0	0	0
23	23.5	17	0	0	1
23	23.5	18	1	1	0
23	23.5	19	0	1	1
23	23.5	20	0	0	1
23	23.5	21	0	0	0
23	23.5	22	0	1	0
23	23.5	23	1	1	0
23	23.5	24	0	0	1
23	23.5	25	0	0	1
23	23.5	26	1	1	0
23	23.5	27	0	1	1
23	23.5	28	1	1	0
23	23.5	29	0	0	0
23	23.5	30	0	1	1
23	23.5	31	0	0	1
23	23.5	32	0	1	1
23	23.5	33	0	0	1
23	23.5	34	0	0	1
23	23.5	35	0	0	1
23	23.5	36	0	0	1
23	23.5	37	0	1	1
23	23.5	38	0	0	0
23.5	24	1	0	0	1
23.5	24	2	0	0	1
23.5	24	3	0	0	0
23.5	24	4	0	0	1
23.5	24	5	0	0	1
23.5	24	6	0	0	0
23.5	24	7	0	0	0
23.5	24	8	0	0	1
23.5	24	9	0	0	1
23.5	24	10	0	0	1
23.5	24	11	0	0	1
23.5	24	12	0	1	0
23.5	24	13	0	1	0
23.5	24	14	0	0	1
23.5	24	15	0	0	1
23.5	24	16	0	0	1
23.5	24	17	0	0	1
23.5	24	18	0	0	1
23.5	24	19	0	0	0
23.5	24	20	0	0	1
23.5	24	21	0	0	1
23.5	24	22	0	0	0
23.5	24	23	0	1	1
23.5	24	24	0	1	0
23.5	24	25	0	0	1
23.5	24	26	0	0	1
23.5	24	27	0	1	0
23.5	24	28	0	1	1
23.5	24	29	1	1	0
23.5	24	30	0	0	0
23.5	24	31	0	0	1
23.5	24	32	0	0	1
23.5	24	33	0	0	1
23.5	24	34	0	0	1
23.5	24	35	0	1	1
23.5	24	36	0	0	1
23.5	24	37	0	0	1
23.5	24	38	0	0	1
23.5	24	39	0	0	1
24	24.5	1	0	0	1
24	24.5	2	0	0	1
24	24.5	3	0	0	0
24	24.5	4	0	0	1
24	24.5	5	0	0	1
24	24.5	6	0	0	0
24	24.5	7	0	0	0
24	24.5	8	0	0	1
24	24.5	9	0	0	1
24	24.5	10	0	1	1
24	24.5	11	0	0	1
24	24.5	12	0	0	0
24	24.5	13	0	1	0
24	24.5	14	0	0	1
24	24.5	15	0	1	1
24	24.5	16	0	0	1
24	24.5	17	0	0	1
24	24.5	18	0	0	1
24	24.5	19	0	0	0
24	24.5	20	0	0	1
24	24.5	21	0	0	0
24	24.5	22	1	1	0
24	24.5	23	0	1	0
24	24.5	24	0	0	1
24	24.5	25	0	0	1
24	24.5	26	0	0	0
24	24.5	27	0	1	1
24	24.5	28	0	1	0
24	24.5	29	0	0	0
24	24.5	30	0	0	1
24	24.5	31	0	0	1
24	24.5	32	0	0	1
24	24.5	33	0	0	1
24	24.5	34	0	1	1
24	24.5	35	0	0	1
24	24.5	36	0	0	1
24	24.5	37	0	0	1
24	24.5	38	0	0	1
24.5	25	1	0	0	1
24.5	25	2	0	0	1
24.5	25	3	0	0	0
24.5	25	4	0	0	1
24.5	25	5	0	0	1
24.5	25	6	0	1	0
24.5	25	7	0	0	1
24.5	25	8	0	0	1
24.5	25	9	0	0	1
24.5	25	10	0	1	1
24.5	25	11	0	0	1
24.5	25	12	0	0	1
24.5	25	13	0	1	0
24.5	25	14	0	0	1
24.5	25	15	0	1	1
24.5	25	16	0	1	1
24.5	25	17	0	0	1
24.5	25	18	0	1	1
24.5	25	19	0	0	1
24.5	25	20	0	0	1
24.5	25	21	0	0	1
24.5	25	22	0	1	0
24.5	25	23	0	1	0
24.5	25	24	0	0	1
24.5	25	25	0	0	1
24.5	25	26	0	0	1
24.5	25	27	1	1	0
24.5	25	28	0	1	0
24.5	25	29	0	0	0
24.5	25	30	0	0	1
24.5	25	31	0	0	1
24.5	25	32	0	0	1
24.5	25	33	0	0	1
24.5	25	34	0	1	1
24.5	25	35	0	0	1
24.5	25	36	0	0	1
24.5	25	37	0	0	1
24.5	25	38	0	0	1
25	25.5	1	0	0	1
25	25.5	2	0	0	1
25	25.5	3	0	0	1
25	25.5	4	0	0	1
25	25.5	5	0	1	0
25	25.5	6	0	0	1
25	25.5	7	0	0	1
25	25.5	8	0	0	1
25	25.5	9	0	1	1
25	25.5	10	0	0	1
25	25.5	11	0	0	1
25	25.5	12	0	1	1
25	25.5	13	0	0	1
25	25.5	14	0	0	1
25	25.5	15	0	1	1
25	25.5	16	0	1	1
25	25.5	17	0	1	0
25	25.5	18	0	0	1
25	25.5	19	0	0	1
25	25.5	20	0	0	1
25	25.5	21	0	0	0
25	25.5	22	0	1	0
25	25.5	23	1	1	1
25	25.5	24	0	1	1
25	25.5	25	0	0	1
25	25.5	26	0	0	1
25	25.5	27	0	0	0
25	25.5	28	0	0	1
25	25.5	29	0	0	0
25	25.5	30	0	0	1
25	25.5	31	0	0	1
25	25.5	32	0	0	1
25	25.5	33	0	0	1
25	25.5	34	0	0	1
25	25.5	35	0	1	1
25	25.5	36	0	0	1
25	25.5	37	0	0	1
25	25.5	38	0	0	1
25.5	26	1	0	0	1
25.5	26	2	0	0	1
25.5	26	3	0	0	1
25.5	26	4	0	0	1
25.5	26	5	0	0	1
25.5	26	6	0	1	0
25.5	26	7	0	0	1
25.5	26	8	0	0	1
25.5	26	9	0	0	1
25.5	26	10	0	1	1
25.5	26	11	0	0	1
25.5	26	12	0	0	1
25.5	26	13	0	0	1
25.5	26	14	0	0	0
25.5	26	15	0	0	1
25.5	26	16	0	1	1
25.5	26	17	0	1	0
25.5	26	18	0	0	1
25.5	26	19	0	0	1
25.5	26	20	0	0	1
25.5	26	21	0	0	1
25.5	26	22	0	0	1
25.5	26	23	0	0	0
25.5	26	24	0	1	1
25.5	26	25	0	0	1
25.5	26	26	0	0	1
25.5	26	27	0	0	0
25.5	26	28	0	1	1
25.5	26	29	0	0	0
25.5	26	30	0	1	1
25.5	26	31	0	0	1
25.5	26	32	0	0	1
25.5	26	33	0	0	1
25.5	26	34	0	0	1
25.5	26	35	0	1	1
25.5	26	36	0	0	1
25.5	26	37	0	0	1
25.5	26	38	0	0	1
26	26.5	1	0	0	1
26	26.5	2	0	0	1
26	26.5	3	0	0	1
26	26.5	4	0	0	1
26	26.5	5	0	0	1
[truncated: 2,646 more rows]

## Sheet: attP2>dTrpA1-data
timeBinStart	timeBinStop	larva	boolRoll	boolBend	boolCrawl
0	0.5	1	0	1	0
0	0.5	2	0	0	0
0	0.5	3	0	0	0
0	0.5	4	0	0	0
0	0.5	5	0	0	0
0	0.5	6	0	0	0
0	0.5	7	0	0	0
0	0.5	8	0	0	0
0	0.5	9	0	0	0
0	0.5	10	0	0	0
0	0.5	11	0	0	0
0	0.5	12	0	0	0
0	0.5	13	0	0	0
0	0.5	14	0	0	0
0	0.5	15	0	1	0
0	0.5	16	0	1	0
0	0.5	17	0	0	0
0	0.5	18	0	0	0
0	0.5	19	0	0	0
0	0.5	20	0	0	0
0	0.5	21	0	0	0
0	0.5	22	0	0	0
0	0.5	23	0	1	0
0	0.5	24	0	0	0
0	0.5	25	0	0	0
0	0.5	26	0	0	0
0	0.5	27	0	0	0
0	0.5	28	0	0	0
0	0.5	29	0	0	0
0	0.5	30	0	0	0
0	0.5	31	0	1	0
0	0.5	32	0	0	0
0	0.5	33	0	0	0
0	0.5	34	0	0	0
0	0.5	35	0	0	0
0	0.5	36	0	0	0
0	0.5	37	0	0	0
0	0.5	38	0	0	0
0	0.5	39	0	0	0
0	0.5	40	0	0	0
0	0.5	41	0	0	0
0	0.5	42	0	0	0
0	0.5	43	0	0	0
0	0.5	44	0	0	0
0.5	1	1	0	1	0
0.5	1	2	0	0	0
0.5	1	3	0	1	0
0.5	1	4	0	0	0
0.5	1	5	0	0	0
0.5	1	6	0	0	0
0.5	1	7	0	0	0
0.5	1	8	0	0	0
0.5	1	9	0	0	0
0.5	1	10	0	0	0
0.5	1	11	0	0	1
0.5	1	12	0	0	0
0.5	1	13	0	0	0
0.5	1	14	0	0	0
0.5	1	15	0	1	0
0.5	1	16	0	1	0
0.5	1	17	0	0	0
0.5	1	18	0	0	1
0.5	1	19	0	1	0
0.5	1	20	0	0	0
0.5	1	21	0	0	1
0.5	1	22	0	1	0
0.5	1	23	0	0	1
0.5	1	24	0	0	0
0.5	1	25	0	0	1
0.5	1	26	0	0	1
0.5	1	27	0	0	1
0.5	1	28	0	0	0
0.5	1	29	0	0	1
0.5	1	30	0	1	0
0.5	1	31	0	0	0
0.5	1	32	0	0	1
0.5	1	33	0	0	0
0.5	1	34	0	0	0
0.5	1	35	0	0	0
0.5	1	36	0	0	0
0.5	1	37	0	0	1
0.5	1	38	0	1	0
0.5	1	39	0	0	0
0.5	1	40	0	0	1
0.5	1	41	0	0	1
0.5	1	42	0	0	0
0.5	1	43	0	0	1
1	1.5	1	0	1	0
1	1.5	2	0	0	0
1	1.5	3	0	1	0
1	1.5	4	0	0	0
1	1.5	5	0	0	0
1	1.5	6	0	0	0
1	1.5	7	0	0	0
1	1.5	8	0	0	0
1	1.5	9	0	0	0
1	1.5	10	0	0	0
1	1.5	11	0	0	0
1	1.5	12	0	0	1
1	1.5	13	0	0	0
1	1.5	14	0	1	0
1	1.5	15	0	1	0
1	1.5	16	0	1	0
1	1.5	17	0	1	0
1	1.5	18	0	0	0
1	1.5	19	0	0	1
1	1.5	20	0	0	0
1	1.5	21	0	0	0
1	1.5	22	0	0	1
1	1.5	23	0	1	0
1	1.5	24	0	0	1
1	1.5	25	0	0	1
1	1.5	26	0	0	0
1	1.5	27	0	0	1
1	1.5	28	0	0	1
1	1.5	29	0	0	1
1	1.5	30	0	0	0
1	1.5	31	0	0	1
1	1.5	32	0	1	0
1	1.5	33	0	0	0
1	1.5	34	0	0	1
1	1.5	35	0	0	0
1	1.5	36	0	0	0
1	1.5	37	0	0	0
1	1.5	38	0	0	0
1	1.5	39	0	0	1
1	1.5	40	0	0	0
1	1.5	41	0	0	0
1	1.5	42	0	0	1
1	1.5	43	0	0	1
1	1.5	44	0	0	0
1	1.5	45	0	0	1
1.5	2	1	0	1	0
1.5	2	2	0	0	0
1.5	2	3	0	1	1
1.5	2	4	0	0	0
1.5	2	5	0	0	0
1.5	2	6	0	0	0
1.5	2	7	0	0	0
1.5	2	8	0	0	0
1.5	2	9	0	0	1
1.5	2	10	0	0	0
1.5	2	11	0	0	1
1.5	2	12	0	0	1
1.5	2	13	0	1	0
1.5	2	14	0	1	0
1.5	2	15	0	1	0
1.5	2	16	0	0	0
1.5	2	17	0	0	0
1.5	2	18	0	0	1
1.5	2	19	0	0	0
1.5	2	20	0	0	0
1.5	2	21	0	0	1
1.5	2	22	0	1	0
1.5	2	23	0	0	1
1.5	2	24	0	0	1
1.5	2	25	0	0	0
1.5	2	26	0	0	1
1.5	2	27	0	0	1
1.5	2	28	0	0	1
1.5	2	29	0	0	0
1.5	2	30	0	0	1
1.5	2	31	0	1	0
1.5	2	32	0	0	0
1.5	2	33	0	0	1
1.5	2	34	0	0	0
1.5	2	35	0	0	0
1.5	2	36	0	0	0
1.5	2	37	0	0	1
1.5	2	38	0	0	1
1.5	2	39	0	0	0
1.5	2	40	0	0	1
1.5	2	41	0	1	1
1.5	2	42	0	0	0
1.5	2	43	0	0	1
2	2.5	1	0	1	0
2	2.5	2	0	0	1
2	2.5	3	0	1	1
2	2.5	4	0	0	0
2	2.5	5	0	0	1
2	2.5	6	0	0	0
2	2.5	7	0	0	1
2	2.5	8	0	1	1
2	2.5	9	0	0	1
2	2.5	10	0	1	0
2	2.5	11	0	0	1
2	2.5	12	0	0	1
2	2.5	13	0	1	0
2	2.5	14	0	1	1
2	2.5	15	0	1	0
2	2.5	16	0	0	0
2	2.5	17	0	0	0
2	2.5	18	0	0	1
2	2.5	19	0	1	0
2	2.5	20	0	0	1
2	2.5	21	0	0	1
2	2.5	22	0	1	0
2	2.5	23	0	0	0
2	2.5	24	0	0	1
2	2.5	25	0	0	1
2	2.5	26	0	0	1
2	2.5	27	0	0	1
2	2.5	28	0	0	1
2	2.5	29	0	1	0
2	2.5	30	0	0	1
2	2.5	31	0	0	1
2	2.5	32	0	0	1
2	2.5	33	0	0	1
2	2.5	34	0	0	0
2	2.5	35	0	0	1
2	2.5	36	0	0	1
2	2.5	37	0	0	1
2	2.5	38	0	0	1
2	2.5	39	0	1	1
2	2.5	40	0	0	1
2	2.5	41	0	0	1
2	2.5	42	0	1	1
2	2.5	43	0	0	1
2	2.5	44	0	0	1
2.5	3	1	0	1	0
2.5	3	2	0	0	1
2.5	3	3	0	1	0
2.5	3	4	0	0	1
2.5	3	5	0	1	1
2.5	3	6	0	0	1
2.5	3	7	0	0	1
2.5	3	8	0	0	1
2.5	3	9	0	0	1
2.5	3	10	0	0	1
2.5	3	11	0	1	1
2.5	3	12	0	0	1
2.5	3	13	0	0	1
2.5	3	14	0	1	0
2.5	3	15	0	1	0
2.5	3	16	0	1	0
2.5	3	17	0	0	0
2.5	3	18	0	1	0
2.5	3	19	0	0	1
2.5	3	20	0	1	0
2.5	3	21	0	0	1
2.5	3	22	0	0	1
2.5	3	23	0	1	1
2.5	3	24	0	1	0
2.5	3	25	0	0	1
2.5	3	26	0	0	1
2.5	3	27	0	0	1
2.5	3	28	0	0	1
2.5	3	29	0	0	1
2.5	3	30	0	1	0
2.5	3	31	0	1	1
2.5	3	32	0	0	1
2.5	3	33	0	0	1
2.5	3	34	0	0	1
2.5	3	35	0	0	0
2.5	3	36	0	0	1
2.5	3	37	0	0	1
2.5	3	38	0	0	1
2.5	3	39	0	0	1
2.5	3	40	0	1	1
2.5	3	41	0	0	1
2.5	3	42	0	0	1
2.5	3	43	0	1	1
2.5	3	44	0	0	1
2.5	3	45	0	1	1
3	3.5	1	0	1	0
3	3.5	2	0	0	1
3	3.5	3	0	0	0
3	3.5	4	0	0	1
3	3.5	5	0	1	1
3	3.5	6	0	0	1
3	3.5	7	0	1	0
3	3.5	8	0	0	1
3	3.5	9	0	0	1
3	3.5	10	0	0	1
3	3.5	11	0	1	1
3	3.5	12	0	0	1
3	3.5	13	0	0	1
3	3.5	14	0	1	0
3	3.5	15	0	1	0
3	3.5	16	0	1	0
3	3.5	17	0	0	0
3	3.5	18	0	1	0
3	3.5	19	0	1	1
3	3.5	20	0	1	0
3	3.5	21	0	1	1
3	3.5	22	0	0	1
3	3.5	23	0	1	1
3	3.5	24	0	1	0
3	3.5	25	0	0	1
3	3.5	26	0	0	1
3	3.5	27	0	0	1
3	3.5	28	0	0	1
3	3.5	29	0	0	1
3	3.5	30	0	1	1
3	3.5	31	0	1	1
3	3.5	32	0	0	1
3	3.5	33	0	0	1
3	3.5	34	0	1	0
3	3.5	35	0	0	1
3	3.5	36	0	0	1
3	3.5	37	0	0	1
3	3.5	38	0	0	0
3	3.5	39	0	1	0
3	3.5	40	0	0	1
3	3.5	41	0	0	1
3	3.5	42	0	0	1
3	3.5	43	0	0	1
3	3.5	44	0	1	1
3.5	4	1	0	1	0
3.5	4	2	0	0	1
3.5	4	3	0	1	0
3.5	4	4	0	0	1
3.5	4	5	0	0	1
3.5	4	6	0	1	1
3.5	4	7	0	1	0
3.5	4	8	0	0	1
3.5	4	9	0	0	1
3.5	4	10	0	0	1
3.5	4	11	0	0	1
3.5	4	12	0	0	1
3.5	4	13	0	0	1
3.5	4	14	0	1	0
3.5	4	15	0	1	0
3.5	4	16	0	1	0
3.5	4	17	0	0	1
3.5	4	18	0	1	0
3.5	4	19	0	1	1
3.5	4	20	0	1	0
3.5	4	21	0	1	1
3.5	4	22	0	0	1
3.5	4	23	0	1	0
3.5	4	24	0	1	1
3.5	4	25	0	0	1
3.5	4	26	0	0	1
3.5	4	27	0	0	1
3.5	4	28	0	0	1
3.5	4	29	0	0	1
3.5	4	30	0	1	1
3.5	4	31	0	0	1
3.5	4	32	0	0	1
3.5	4	33	0	0	1
3.5	4	34	0	0	1
3.5	4	35	0	1	1
3.5	4	36	0	0	1
3.5	4	37	0	0	1
3.5	4	38	0	0	1
3.5	4	39	0	0	0
3.5	4	40	0	0	1
3.5	4	41	0	0	1
3.5	4	42	0	0	1
3.5	4	43	0	0	1
3.5	4	44	0	0	1
3.5	4	45	0	0	1
4	4.5	1	0	1	0
4	4.5	2	0	1	0
4	4.5	3	0	1	1
4	4.5	4	0	0	1
4	4.5	5	0	0	1
4	4.5	6	0	1	1
4	4.5	7	0	1	0
4	4.5	8	0	0	1
4	4.5	9	0	0	1
4	4.5	10	0	0	1
4	4.5	11	0	0	1
4	4.5	12	0	0	1
4	4.5	13	0	0	1
4	4.5	14	0	1	0
4	4.5	15	0	1	0
4	4.5	16	0	1	0
4	4.5	17	0	0	1
4	4.5	18	0	1	0
4	4.5	19	0	0	1
4	4.5	20	0	1	0
4	4.5	21	0	1	1
4	4.5	22	0	0	1
4	4.5	23	0	1	0
4	4.5	24	0	0	0
4	4.5	25	0	0	1
4	4.5	26	0	0	1
4	4.5	27	0	0	1
4	4.5	28	0	1	0
4	4.5	29	0	0	1
4	4.5	30	0	0	1
4	4.5	31	0	0	1
4	4.5	32	0	0	0
4	4.5	33	0	0	1
4	4.5	34	0	0	1
4	4.5	35	0	1	1
4	4.5	36	0	0	1
4	4.5	37	0	0	1
4	4.5	38	0	0	1
4	4.5	39	0	0	0
4	4.5	40	0	0	1
4	4.5	41	0	0	1
4	4.5	42	0	0	1
4	4.5	43	0	0	1
4	4.5	44	0	0	1
4	4.5	45	0	0	1
4.5	5	1	0	0	0
4.5	5	2	0	1	0
4.5	5	3	0	1	0
4.5	5	4	0	0	1
4.5	5	5	0	0	1
4.5	5	6	0	1	1
4.5	5	7	0	0	1
4.5	5	8	0	0	1
4.5	5	9	0	0	1
4.5	5	10	0	0	1
4.5	5	11	0	0	1
4.5	5	12	0	0	1
4.5	5	13	0	0	1
4.5	5	14	0	1	0
4.5	5	15	0	1	0
4.5	5	16	0	0	1
4.5	5	17	0	1	1
4.5	5	18	0	0	1
4.5	5	19	0	1	0
4.5	5	20	0	0	1
4.5	5	21	0	0	1
4.5	5	22	0	1	0
4.5	5	23	0	0	0
4.5	5	24	0	0	1
4.5	5	25	0	0	1
4.5	5	26	0	1	1
4.5	5	27	0	0	1
4.5	5	28	0	0	1
4.5	5	29	0	0	1
4.5	5	30	0	0	0
4.5	5	31	0	0	1
4.5	5	32	0	0	1
4.5	5	33	0	0	1
4.5	5	34	0	0	1
4.5	5	35	0	0	1
4.5	5	36	0	0	1
4.5	5	37	0	1	0
4.5	5	38	0	1	1
4.5	5	39	0	0	1
4.5	5	40	0	0	1
4.5	5	41	0	0	1
4.5	5	42	0	0	1
4.5	5	43	0	0	1
5	5.5	1	0	0	0
5	5.5	2	0	1	0
5	5.5	3	0	1	1
5	5.5	4	0	0	1
5	5.5	5	0	0	1
5	5.5	6	0	0	1
5	5.5	7	1	1	0
5	5.5	8	0	0	0
5	5.5	9	0	0	1
5	5.5	10	0	0	1
5	5.5	11	0	0	1
5	5.5	12	0	0	1
5	5.5	13	0	0	1
5	5.5	14	0	0	1
5	5.5	15	0	1	0
5	5.5	16	0	1	1
5	5.5	17	0	0	1
5	5.5	18	0	0	1
5	5.5	19	0	0	1
5	5.5	20	0	1	0
5	5.5	21	0	0	1
5	5.5	22	0	0	1
5	5.5	23	0	1	0
5	5.5	24	0	0	0
5	5.5	25	0	0	1
5	5.5	26	0	0	1
5	5.5	27	0	0	1
5	5.5	28	0	1	1
5	5.5	29	0	0	1
5	5.5	30	0	0	1
5	5.5	31	0	1	0
5	5.5	32	0	1	0
5	5.5	33	0	1	1
5	5.5	34	0	0	1
5	5.5	35	0	0	1
5	5.5	36	0	0	1
5	5.5	37	0	0	1
5	5.5	38	0	0	1
5	5.5	39	0	0	0
5	5.5	40	0	1	0
5	5.5	41	0	0	1
5	5.5	42	0	0	1
5	5.5	43	0	0	1
5	5.5	44	0	0	1
5	5.5	45	0	0	1
5.5	6	1	0	0	0
5.5	6	2	0	1	0
5.5	6	3	0	0	1
5.5	6	4	0	0	1
5.5	6	5	0	0	1
5.5	6	6	0	1	0
5.5	6	7	0	0	1
5.5	6	8	0	0	1
5.5	6	9	0	0	1
5.5	6	10	0	0	1
5.5	6	11	0	0	1
5.5	6	12	0	0	1
5.5	6	13	0	0	1
5.5	6	14	0	1	1
5.5	6	15	0	1	1
5.5	6	16	0	0	1
5.5	6	17	0	1	0
5.5	6	18	0	0	1
5.5	6	19	0	1	0
5.5	6	20	0	0	1
5.5	6	21	0	0	1
5.5	6	22	0	1	0
5.5	6	23	0	0	0
5.5	6	24	0	0	1
5.5	6	25	0	0	1
5.5	6	26	0	0	1
5.5	6	27	0	0	1
5.5	6	28	0	0	1
5.5	6	29	0	1	0
5.5	6	30	0	1	0
5.5	6	31	0	1	1
5.5	6	32	0	0	1
5.5	6	33	0	0	1
5.5	6	34	0	0	1
5.5	6	35	0	0	1
5.5	6	36	0	0	0
5.5	6	37	0	1	0
5.5	6	38	0	0	1
5.5	6	39	0	0	1
5.5	6	40	0	1	1
5.5	6	41	0	0	1
5.5	6	42	0	0	1
6	6.5	1	0	0	1
6	6.5	2	0	0	1
6	6.5	3	0	0	1
6	6.5	4	0	0	1
6	6.5	5	0	0	1
6	6.5	6	0	1	0
6	6.5	7	0	1	0
6	6.5	8	0	0	1
6	6.5	9	0	0	1
6	6.5	10	0	0	1
6	6.5	11	0	0	1
6	6.5	12	0	0	1
6	6.5	13	0	0	0
6	6.5	14	0	1	1
6	6.5	15	0	1	0
6	6.5	16	0	0	1
6	6.5	17	0	1	0
6	6.5	18	0	0	1
6	6.5	19	0	1	0
6	6.5	20	0	1	1
6	6.5	21	0	0	1
6	6.5	22	0	1	0
6	6.5	23	0	0	0
6	6.5	24	0	0	1
6	6.5	25	0	0	1
6	6.5	26	0	0	1
6	6.5	27	0	0	1
6	6.5	28	0	0	1
6	6.5	29	0	0	1
6	6.5	30	0	1	1
6	6.5	31	0	1	0
6	6.5	32	0	0	1
6	6.5	33	0	0	1
6	6.5	34	0	0	1
6	6.5	35	0	0	1
6	6.5	36	0	1	1
6	6.5	37	0	0	1
6	6.5	38	0	0	1
6	6.5	39	0	1	1
6	6.5	40	0	0	1
6	6.5	41	0	0	1
6	6.5	42	0	1	1
6	6.5	43	0	1	1
6	6.5	44	0	0	1
6.5	7	1	0	0	1
6.5	7	2	0	0	0
6.5	7	3	0	0	0
6.5	7	4	0	0	1
6.5	7	5	0	0	1
6.5	7	6	0	1	1
6.5	7	7	0	1	0
6.5	7	8	0	1	1
6.5	7	9	0	1	0
6.5	7	10	0	0	1
6.5	7	11	0	1	0
6.5	7	12	0	0	1
6.5	7	13	0	0	1
6.5	7	14	0	0	1
6.5	7	15	0	0	1
6.5	7	16	0	1	1
6.5	7	17	0	0	0
6.5	7	18	0	1	0
6.5	7	19	0	0	1
6.5	7	20	0	1	0
6.5	7	21	0	1	0
6.5	7	22	0	1	1
6.5	7	23	0	1	0
6.5	7	24	0	0	0
6.5	7	25	0	0	1
6.5	7	26	0	0	1
6.5	7	27	0	1	1
6.5	7	28	0	0	1
6.5	7	29	0	1	1
6.5	7	30	0	0	1
6.5	7	31	0	0	1
6.5	7	32	0	1	1
6.5	7	33	0	0	1
6.5	7	34	0	0	1
6.5	7	35	0	0	1
6.5	7	36	0	0	1
6.5	7	37	0	1	1
6.5	7	38	0	0	0
6.5	7	39	0	0	1
6.5	7	40	0	1	1
6.5	7	41	0	0	1
6.5	7	42	0	1	1
6.5	7	43	0	1	1
6.5	7	44	0	1	1
6.5	7	45	0	0	1
7	7.5	1	0	0	1
7	7.5	2	0	0	1
7	7.5	3	0	0	1
7	7.5	4	0	0	1
7	7.5	5	0	0	1
7	7.5	6	0	1	1
7	7.5	7	0	1	0
7	7.5	8	0	0	1
7	7.5	9	0	1	0
7	7.5	10	0	0	1
7	7.5	11	0	1	0
7	7.5	12	0	0	1
7	7.5	13	0	0	1
7	7.5	14	0	0	1
7	7.5	15	0	0	1
7	7.5	16	0	1	0
7	7.5	17	0	0	0
7	7.5	18	0	1	0
7	7.5	19	0	0	1
7	7.5	20	0	1	0
7	7.5	21	0	1	0
7	7.5	22	0	1	1
7	7.5	23	0	1	0
7	7.5	24	0	0	0
7	7.5	25	0	0	1
7	7.5	26	0	0	1
7	7.5	27	0	0	0
7	7.5	28	0	1	1
7	7.5	29	0	0	1
7	7.5	30	0	0	1
7	7.5	31	0	0	1
7	7.5	32	0	0	1
7	7.5	33	0	0	1
7	7.5	34	0	0	1
7	7.5	35	0	0	1
7	7.5	36	0	0	1
7	7.5	37	0	0	0
7	7.5	38	0	0	1
7	7.5	39	0	0	1
7	7.5	40	0	1	1
7	7.5	41	0	1	1
7	7.5	42	0	1	1
7	7.5	43	0	1	1
7	7.5	44	0	0	1
7.5	8	1	0	1	0
7.5	8	2	0	0	0
7.5	8	3	0	0	1
7.5	8	4	0	0	1
7.5	8	5	0	0	1
7.5	8	6	0	0	0
7.5	8	7	0	1	0
7.5	8	8	0	0	1
7.5	8	9	0	0	1
7.5	8	10	0	0	1
7.5	8	11	0	1	1
7.5	8	12	0	0	1
7.5	8	13	0	0	1
7.5	8	14	0	0	0
7.5	8	15	0	0	1
7.5	8	16	0	1	0
7.5	8	17	0	0	0
7.5	8	18	0	1	0
7.5	8	19	0	0	1
7.5	8	20	0	1	0
7.5	8	21	0	1	1
7.5	8	22	0	0	1
7.5	8	23	0	1	0
7.5	8	24	0	0	0
7.5	8	25	0	0	1
7.5	8	26	0	0	1
7.5	8	27	0	0	1
7.5	8	28	0	1	0
7.5	8	29	0	0	1
7.5	8	30	0	1	0
7.5	8	31	0	1	0
7.5	8	32	0	0	1
7.5	8	33	0	0	1
7.5	8	34	0	0	1
7.5	8	35	0	0	1
7.5	8	36	0	0	1
7.5	8	37	0	0	1
7.5	8	38	0	1	0
7.5	8	39	0	0	1
7.5	8	40	0	0	1
7.5	8	41	0	1	1
7.5	8	42	0	1	1
7.5	8	43	0	1	1
7.5	8	44	0	1	1
7.5	8	45	0	0	1
8	8.5	1	0	1	0
8	8.5	2	0	0	1
8	8.5	3	0	0	1
8	8.5	4	0	1	1
8	8.5	5	0	0	1
8	8.5	6	0	0	0
8	8.5	7	0	0	1
8	8.5	8	0	0	1
8	8.5	9	0	0	1
8	8.5	10	0	0	1
8	8.5	11	0	0	1
8	8.5	12	0	0	1
8	8.5	13	0	0	1
8	8.5	14	0	0	0
8	8.5	15	0	0	1
8	8.5	16	0	1	0
8	8.5	17	0	1	0
8	8.5	18	0	1	0
8	8.5	19	0	0	1
8	8.5	20	0	1	0
8	8.5	21	0	0	1
8	8.5	22	0	0	1
8	8.5	23	0	1	0
8	8.5	24	0	0	0
8	8.5	25	0	0	1
8	8.5	26	0	0	1
8	8.5	27	0	1	0
8	8.5	28	0	0	1
8	8.5	29	0	1	0
8	8.5	30	0	1	0
8	8.5	31	0	0	1
8	8.5	32	0	0	1
8	8.5	33	0	0	1
8	8.5	34	0	0	1
8	8.5	35	0	0	1
8	8.5	36	0	0	1
8	8.5	37	0	1	1
8	8.5	38	0	0	1
8	8.5	39	0	0	1
8	8.5	40	0	1	1
8	8.5	41	0	1	1
8	8.5	42	0	0	1
8	8.5	43	0	0	1
8.5	9	1	0	1	0
8.5	9	2	0	0	1
8.5	9	3	0	0	1
8.5	9	4	0	1	1
8.5	9	5	0	0	1
8.5	9	6	0	0	0
8.5	9	7	0	0	1
8.5	9	8	0	0	1
8.5	9	9	0	0	1
8.5	9	10	0	0	1
8.5	9	11	0	0	1
8.5	9	12	0	0	1
8.5	9	13	0	0	1
8.5	9	14	0	1	0
8.5	9	15	0	0	0
8.5	9	16	0	1	0
8.5	9	17	0	1	0
8.5	9	18	0	1	1
8.5	9	19	0	1	0
8.5	9	20	0	1	0
8.5	9	21	0	0	1
8.5	9	22	0	0	1
8.5	9	23	0	1	0
8.5	9	24	0	1	0
8.5	9	25	0	0	1
8.5	9	26	0	0	1
8.5	9	27	0	0	1
8.5	9	28	0	1	1
8.5	9	29	0	0	1
8.5	9	30	1	1	0
8.5	9	31	0	1	0
8.5	9	32	0	0	1
8.5	9	33	0	0	1
8.5	9	34	0	0	1
8.5	9	35	0	0	1
8.5	9	36	0	0	1
8.5	9	37	0	0	1
8.5	9	38	0	1	1
8.5	9	39	0	0	1
8.5	9	40	0	0	1
8.5	9	41	0	0	1
8.5	9	42	0	0	1
8.5	9	43	0	0	1
8.5	9	44	0	0	1
8.5	9	45	0	1	1
9	9.5	1	0	1	0
9	9.5	2	0	0	1
9	9.5	3	0	0	1
9	9.5	4	0	0	1
9	9.5	5	0	0	1
9	9.5	6	0	0	0
9	9.5	7	0	0	1
9	9.5	8	0	0	1
9	9.5	9	0	0	1
9	9.5	10	0	0	1
9	9.5	11	0	1	1
9	9.5	12	0	0	1
9	9.5	13	0	1	1
9	9.5	14	0	1	0
9	9.5	15	0	0	1
9	9.5	16	0	1	0
9	9.5	17	0	0	1
9	9.5	18	0	0	1
9	9.5	19	0	1	0
9	9.5	20	0	1	0
9	9.5	21	0	0	1
9	9.5	22	0	0	1
9	9.5	23	0	1	0
9	9.5	24	0	1	0
9	9.5	25	0	0	1
9	9.5	26	0	0	1
9	9.5	27	0	0	1
9	9.5	28	0	1	0
9	9.5	29	0	1	0
9	9.5	30	0	1	0
9	9.5	31	0	1	1
9	9.5	32	0	0	1
9	9.5	33	0	0	1
9	9.5	34	0	0	1
9	9.5	35	0	0	1
9	9.5	36	0	1	1
9	9.5	37	0	0	1
9	9.5	38	0	1	0
9	9.5	39	0	0	1
9	9.5	40	0	0	1
9	9.5	41	0	0	1
9	9.5	42	0	0	1
9	9.5	43	0	1	1
9.5	10	1	0	1	0
9.5	10	2	0	0	1
9.5	10	3	0	0	1
9.5	10	4	0	0	1
9.5	10	5	0	0	1
9.5	10	6	0	0	0
9.5	10	7	0	1	0
9.5	10	8	0	0	1
9.5	10	9	0	0	1
9.5	10	10	0	0	1
9.5	10	11	0	0	1
9.5	10	12	0	0	1
9.5	10	13	0	1	1
9.5	10	14	0	1	0
9.5	10	15	0	0	1
9.5	10	16	0	0	0
9.5	10	17	0	0	1
9.5	10	18	0	0	1
9.5	10	19	0	1	0
9.5	10	20	0	1	0
9.5	10	21	0	1	1
9.5	10	22	0	0	1
9.5	10	23	0	1	1
9.5	10	24	0	1	1
9.5	10	25	0	0	1
9.5	10	26	0	0	1
9.5	10	27	0	0	1
9.5	10	28	0	1	0
9.5	10	29	0	0	0
9.5	10	30	0	1	0
9.5	10	31	0	0	1
9.5	10	32	0	0	1
9.5	10	33	0	0	1
9.5	10	34	0	0	1
9.5	10	35	0	1	1
9.5	10	36	0	1	1
9.5	10	37	0	0	1
9.5	10	38	0	0	1
9.5	10	39	1	1	0
9.5	10	40	0	0	1
9.5	10	41	0	0	1
9.5	10	42	0	0	1
9.5	10	43	0	0	1
9.5	10	44	0	0	1
10	10.5	1	0	1	0
10	10.5	2	0	1	0
10	10.5	3	0	1	0
10	10.5	4	0	0	1
10	10.5	5	0	0	1
10	10.5	6	0	0	0
10	10.5	7	0	1	0
10	10.5	8	0	0	1
10	10.5	9	0	1	1
10	10.5	10	0	0	1
10	10.5	11	0	0	1
10	10.5	12	0	0	1
10	10.5	13	0	0	1
10	10.5	14	0	1	0
10	10.5	15	0	0	1
10	10.5	16	0	0	0
10	10.5	17	0	1	1
10	10.5	18	0	0	1
10	10.5	19	0	1	0
10	10.5	20	0	0	0
10	10.5	21	0	1	1
10	10.5	22	0	0	1
10	10.5	23	0	1	0
10	10.5	24	0	1	1
10	10.5	25	0	0	1
10	10.5	26	0	0	1
10	10.5	27	0	0	1
10	10.5	28	0	0	1
10	10.5	29	0	1	1
10	10.5	30	0	0	1
10	10.5	31	0	0	0
10	10.5	32	0	0	1
10	10.5	33	0	0	1
10	10.5	34	0	0	1
10	10.5	35	0	0	1
10	10.5	36	0	1	0
10	10.5	37	0	1	1
10	10.5	38	0	0	1
10	10.5	39	0	0	0
10	10.5	40	0	0	0
10	10.5	41	0	0	1
10	10.5	42	0	0	1
10	10.5	43	0	0	1
10	10.5	44	0	0	1
10	10.5	45	0	0	1
10.5	11	1	0	1	1
10.5	11	2	0	1	1
10.5	11	3	0	1	0
10.5	11	4	0	0	1
10.5	11	5	0	1	1
10.5	11	6	0	1	0
10.5	11	7	0	0	1
10.5	11	8	0	1	1
10.5	11	9	0	0	1
10.5	11	10	0	0	1
10.5	11	11	0	0	1
10.5	11	12	0	0	1
10.5	11	13	0	1	0
10.5	11	14	0	0	1
10.5	11	15	0	0	0
10.5	11	16	0	1	0
10.5	11	17	0	0	1
10.5	11	18	0	0	1
10.5	11	19	0	0	0
10.5	11	20	0	1	0
10.5	11	21	0	0	1
10.5	11	22	0	1	0
10.5	11	23	0	1	1
10.5	11	24	0	1	1
10.5	11	25	0	0	1
10.5	11	26	0	0	1
10.5	11	27	0	0	1
10.5	11	28	0	1	1
10.5	11	29	0	0	1
10.5	11	30	0	0	0
10.5	11	31	0	0	1
10.5	11	32	0	0	1
10.5	11	33	0	0	1
10.5	11	34	0	0	1
10.5	11	35	0	1	1
10.5	11	36	0	0	1
10.5	11	37	0	0	0
10.5	11	38	0	0	1
10.5	11	39	0	1	0
10.5	11	40	0	0	1
10.5	11	41	0	0	1
10.5	11	42	0	0	1
10.5	11	43	0	0	1
10.5	11	44	0	0	1
11	11.5	1	0	0	1
11	11.5	2	0	0	1
11	11.5	3	0	1	0
11	11.5	4	0	0	1
11	11.5	5	0	1	1
11	11.5	6	0	0	1
11	11.5	7	0	1	0
11	11.5	8	0	0	1
11	11.5	9	0	1	1
11	11.5	10	0	0	1
11	11.5	11	0	1	0
11	11.5	12	0	0	1
11	11.5	13	0	0	1
11	11.5	14	0	1	0
11	11.5	15	0	0	0
11	11.5	16	0	0	0
11	11.5	17	0	1	0
11	11.5	18	0	1	0
11	11.5	19	0	0	1
11	11.5	20	0	0	0
11	11.5	21	0	1	0
11	11.5	22	0	1	0
11	11.5	23	0	1	0
11	11.5	24	0	0	1
11	11.5	25	0	1	1
11	11.5	26	0	0	1
11	11.5	27	0	0	1
11	11.5	28	0	0	1
11	11.5	29	0	0	1
11	11.5	30	0	0	1
11	11.5	31	0	0	1
11	11.5	32	0	0	1
11	11.5	33	0	0	1
11	11.5	34	0	0	1
11	11.5	35	0	0	1
11	11.5	36	0	1	1
11	11.5	37	0	0	1
11	11.5	38	0	0	0
11	11.5	39	0	0	0
11	11.5	40	0	1	0
11	11.5	41	0	0	1
11	11.5	42	0	0	1
11	11.5	43	0	0	1
11	11.5	44	0	1	0
11	11.5	45	0	0	1
11.5	12	1	0	0	1
11.5	12	2	0	0	1
11.5	12	3	0	1	0
11.5	12	4	0	0	1
11.5	12	5	0	0	1
11.5	12	6	0	1	1
11.5	12	7	0	0	1
11.5	12	8	0	0	1
11.5	12	9	0	0	1
11.5	12	10	0	1	0
11.5	12	11	0	0	1
11.5	12	12	0	0	1
11.5	12	13	0	1	0
11.5	12	14	0	1	0
11.5	12	15	0	0	1
11.5	12	16	0	1	0
11.5	12	17	0	1	0
11.5	12	18	0	0	1
11.5	12	19	0	0	0
11.5	12	20	0	1	0
11.5	12	21	0	1	1
11.5	12	22	0	1	0
11.5	12	23	0	0	1
11.5	12	24	0	0	1
11.5	12	25	0	0	1
11.5	12	26	0	0	1
11.5	12	27	0	0	1
11.5	12	28	0	1	1
11.5	12	29	0	0	1
11.5	12	30	0	0	0
11.5	12	31	0	0	1
11.5	12	32	0	0	1
11.5	12	33	0	0	0
11.5	12	34	0	1	1
11.5	12	35	0	0	1
11.5	12	36	0	0	1
11.5	12	37	0	0	0
11.5	12	38	0	1	0
11.5	12	39	0	1	1
11.5	12	40	0	0	1
11.5	12	41	0	0	1
11.5	12	42	0	1	0
11.5	12	43	0	0	1
12	12.5	1	0	0	1
12	12.5	2	0	0	1
12	12.5	3	0	1	0
12	12.5	4	0	0	1
12	12.5	5	0	0	1
12	12.5	6	0	0	1
12	12.5	7	0	1	1
12	12.5	8	0	0	1
12	12.5	9	0	0	1
12	12.5	10	0	0	1
12	12.5	11	0	1	0
12	12.5	12	0	0	1
12	12.5	13	0	0	1
12	12.5	14	0	0	0
12	12.5	15	0	1	0
12	12.5	16	0	0	1
12	12.5	17	0	0	0
12	12.5	18	0	1	0
12	12.5	19	0	1	0
12	12.5	20	0	0	0
12	12.5	21	0	1	0
12	12.5	22	0	1	1
12	12.5	23	0	1	0
12	12.5	24	0	0	1
12	12.5	25	0	0	1
12	12.5	26	0	0	1
12	12.5	27	0	1	1
12	12.5	28	0	0	1
12	12.5	29	0	0	1
12	12.5	30	0	1	1
12	12.5	31	0	0	1
12	12.5	32	0	1	0
12	12.5	33	0	0	1
12	12.5	34	0	0	1
12	12.5	35	0	1	0
12	12.5	36	0	1	1
12	12.5	37	0	0	1
12	12.5	38	0	0	1
12	12.5	39	0	0	0
12	12.5	40	0	1	1
12	12.5	41	1	1	0
12	12.5	42	0	0	1
12	12.5	43	0	1	1
12	12.5	44	0	1	1
12	12.5	45	0	0	1
12.5	13	1	0	1	0
12.5	13	2	0	0	1
12.5	13	3	0	1	0
12.5	13	4	0	0	1
12.5	13	5	0	0	1
12.5	13	6	0	0	0
12.5	13	7	0	0	1
12.5	13	8	0	0	1
12.5	13	9	0	0	1
12.5	13	10	0	1	1
12.5	13	11	0	0	1
12.5	13	12	0	0	1
12.5	13	13	0	0	1
12.5	13	14	0	1	0
12.5	13	15	0	0	0
12.5	13	16	0	0	0
12.5	13	17	0	1	0
12.5	13	18	0	1	0
12.5	13	19	0	1	0
12.5	13	20	0	1	0
12.5	13	21	0	0	1
12.5	13	22	0	1	0
12.5	13	23	0	0	1
12.5	13	24	0	0	1
12.5	13	25	0	0	0
12.5	13	26	0	1	1
12.5	13	27	0	0	1
12.5	13	28	0	0	1
12.5	13	29	0	1	1
12.5	13	30	0	0	1
12.5	13	31	0	1	0
12.5	13	32	0	0	1
12.5	13	33	0	0	1
12.5	13	34	0	1	0
12.5	13	35	0	0	1
12.5	13	36	0	0	1
12.5	13	37	0	0	1
12.5	13	38	0	0	0
12.5	13	39	0	0	1
12.5	13	40	0	1	0
12.5	13	41	0	0	1
12.5	13	42	0	0	1
12.5	13	43	0	0	1
12.5	13	44	0	0	1
13	13.5	1	0	1	1
13	13.5	2	0	0	1
13	13.5	3	0	1	0
13	13.5	4	0	1	0
13	13.5	5	0	0	1
13	13.5	6	0	1	0
13	13.5	7	0	0	1
13	13.5	8	0	0	1
13	13.5	9	0	0	1
13	13.5	10	0	0	1
13	13.5	11	0	1	1
13	13.5	12	0	0	1
13	13.5	13	0	0	1
13	13.5	14	0	0	1
13	13.5	15	0	1	0
13	13.5	16	0	1	0
13	13.5	17	0	1	0
13	13.5	18	0	1	0
13	13.5	19	1	1	0
13	13.5	20	0	1	0
13	13.5	21	0	1	0
13	13.5	22	0	0	1
13	13.5	23	0	1	0
13	13.5	24	0	0	1
13	13.5	25	0	0	1
13	13.5	26	0	0	0
13	13.5	27	0	0	1
13	13.5	28	0	0	1
13	13.5	29	0	0	1
13	13.5	30	0	1	1
13	13.5	31	0	0	0
13	13.5	32	0	0	1
13	13.5	33	0	0	1
13	13.5	34	0	1	1
13	13.5	35	0	0	1
13	13.5	36	0	0	1
13	13.5	37	0	1	0
13	13.5	38	0	0	0
13	13.5	39	0	0	1
13	13.5	40	0	1	0
13	13.5	41	0	0	1
13	13.5	42	0	0	1
13	13.5	43	0	0	1
13	13.5	44	0	0	1
13.5	14	1	0	0	0
13.5	14	2	0	0	1
13.5	14	3	0	1	0
13.5	14	4	0	1	0
13.5	14	5	0	0	1
13.5	14	6	0	1	0
13.5	14	7	0	0	0
13.5	14	8	0	0	1
13.5	14	9	0	1	1
13.5	14	10	0	0	1
13.5	14	11	0	1	0
13.5	14	12	0	0	1
13.5	14	13	0	0	1
13.5	14	14	0	1	0
13.5	14	15	0	1	1
13.5	14	16	0	1	0
13.5	14	17	0	1	0
13.5	14	18	0	1	0
13.5	14	19	0	0	0
13.5	14	20	0	1	0
13.5	14	21	0	1	0
13.5	14	22	0	0	1
13.5	14	23	0	0	1
13.5	14	24	0	0	1
13.5	14	25	0	0	0
13.5	14	26	0	0	1
13.5	14	27	0	0	1
13.5	14	28	0	1	0
13.5	14	29	0	0	1
13.5	14	30	0	1	0
13.5	14	31	0	1	0
13.5	14	32	0	0	1
13.5	14	33	0	0	1
13.5	14	34	0	0	1
13.5	14	35	0	0	1
13.5	14	36	0	1	1
13.5	14	37	0	1	0
13.5	14	38	0	0	0
13.5	14	39	0	0	1
13.5	14	40	0	1	1
13.5	14	41	0	0	1
13.5	14	42	0	1	0
13.5	14	43	0	0	1
13.5	14	44	0	0	1
14	14.5	1	0	0	0
14	14.5	2	0	0	1
14	14.5	3	0	1	0
14	14.5	4	0	1	0
14	14.5	5	0	0	1
14	14.5	6	0	1	0
14	14.5	7	0	1	0
14	14.5	8	0	0	1
14	14.5	9	0	1	0
14	14.5	10	0	0	1
14	14.5	11	0	1	0
14	14.5	12	0	0	1
14	14.5	13	0	0	1
14	14.5	14	0	1	0
14	14.5	15	0	0	1
14	14.5	16	0	1	0
14	14.5	17	0	1	0
14	14.5	18	0	1	0
14	14.5	19	0	0	0
14	14.5	20	0	1	0
14	14.5	21	0	0	1
14	14.5	22	0	0	1
14	14.5	23	0	0	0
14	14.5	24	0	0	1
14	14.5	25	0	1	0
14	14.5	26	0	0	1
14	14.5	27	0	0	1
14	14.5	28	0	1	0
14	14.5	29	0	0	1
14	14.5	30	0	0	1
14	14.5	31	0	1	0
14	14.5	32	0	0	1
14	14.5	33	0	0	1
14	14.5	34	0	0	1
14	14.5	35	0	0	1
14	14.5	36	0	0	1
14	14.5	37	0	1	1
14	14.5	38	1	1	0
14	14.5	39	0	0	1
14	14.5	40	0	0	1
14	14.5	41	0	0	1
14	14.5	42	0	0	1
14	14.5	43	0	1	0
14	14.5	44	0	0	1
14	14.5	45	0	0	1
14.5	15	1	0	1	1
14.5	15	2	0	0	1
14.5	15	3	0	1	0
14.5	15	4	0	0	1
14.5	15	5	0	0	1
14.5	15	6	0	0	0
14.5	15	7	0	1	0
14.5	15	8	0	0	1
14.5	15	9	0	1	1
14.5	15	10	0	0	1
14.5	15	11	0	1	0
14.5	15	12	0	0	1
14.5	15	13	0	0	1
14.5	15	14	0	0	1
14.5	15	15	0	0	1
14.5	15	16	0	0	0
14.5	15	17	0	1	0
14.5	15	18	0	1	1
14.5	15	19	0	0	1
14.5	15	20	0	1	0
14.5	15	21	0	0	1
14.5	15	22	0	0	1
14.5	15	23	0	0	1
14.5	15	24	0	0	1
14.5	15	25	0	1	0
14.5	15	26	0	0	0
14.5	15	27	0	0	1
14.5	15	28	0	1	0
14.5	15	29	0	0	1
14.5	15	30	0	0	1
14.5	15	31	0	1	0
14.5	15	32	0	0	1
14.5	15	33	0	0	1
14.5	15	34	0	0	1
14.5	15	35	0	0	1
14.5	15	36	0	0	1
14.5	15	37	0	0	1
14.5	15	38	0	1	0
14.5	15	39	0	0	1
14.5	15	40	0	0	1
14.5	15	41	0	0	1
14.5	15	42	0	1	0
14.5	15	43	0	1	1
14.5	15	44	0	0	1
14.5	15	45	0	0	1
15	15.5	1	0	1	1
15	15.5	2	0	0	1
15	15.5	3	0	0	0
15	15.5	4	0	0	1
15	15.5	5	0	0	1
15	15.5	6	0	0	0
15	15.5	7	0	1	0
15	15.5	8	0	0	1
15	15.5	9	0	0	1
15	15.5	10	0	0	1
15	15.5	11	0	1	1
15	15.5	12	0	0	1
15	15.5	13	0	0	1
15	15.5	14	0	0	1
15	15.5	15	0	0	1
15	15.5	16	0	1	0
15	15.5	17	0	1	0
15	15.5	18	0	1	0
15	15.5	19	0	0	1
15	15.5	20	0	0	0
15	15.5	21	0	0	1
15	15.5	22	0	0	1
15	15.5	23	0	0	1
15	15.5	24	0	0	1
15	15.5	25	0	1	1
15	15.5	26	0	0	0
15	15.5	27	0	0	1
15	15.5	28	0	1	0
15	15.5	29	0	0	1
15	15.5	30	0	0	1
15	15.5	31	0	1	0
15	15.5	32	0	0	1
15	15.5	33	0	0	1
15	15.5	34	0	0	1
15	15.5	35	0	0	1
15	15.5	36	0	0	1
15	15.5	37	0	0	1
15	15.5	38	0	0	0
15	15.5	39	0	0	0
15	15.5	40	0	0	1
15	15.5	41	0	0	1
15	15.5	42	0	1	0
15	15.5	43	0	1	1
15	15.5	44	0	0	1
15	15.5	45	0	1	1
15.5	16	1	0	1	0
15.5	16	2	0	0	1
15.5	16	3	0	0	0
15.5	16	4	0	0	1
15.5	16	5	0	0	1
15.5	16	6	0	0	0
15.5	16	7	0	1	0
15.5	16	8	0	0	1
15.5	16	9	0	0	1
15.5	16	10	0	0	1
15.5	16	11	0	0	1
15.5	16	12	0	0	1
15.5	16	13	0	0	1
15.5	16	14	0	0	1
15.5	16	15	0	0	0
15.5	16	16	0	1	0
15.5	16	17	0	1	0
15.5	16	18	0	0	1
15.5	16	19	0	0	1
15.5	16	20	0	0	0
15.5	16	21	0	0	1
15.5	16	22	0	0	1
15.5	16	23	0	0	1
15.5	16	24	0	1	1
15.5	16	25	0	0	1
15.5	16	26	0	0	1
15.5	16	27	0	1	1
15.5	16	28	0	0	1
15.5	16	29	0	0	1
15.5	16	30	0	1	0
15.5	16	31	0	0	1
15.5	16	32	0	0	1
15.5	16	33	0	0	1
15.5	16	34	0	0	1
15.5	16	35	0	0	1
15.5	16	36	0	0	1
15.5	16	37	0	0	1
15.5	16	38	0	0	0
15.5	16	39	0	1	1
15.5	16	40	0	0	1
15.5	16	41	0	1	0
15.5	16	42	0	1	1
15.5	16	43	0	0	1
15.5	16	44	0	1	1
16	16.5	1	0	0	1
16	16.5	2	0	0	1
16	16.5	3	0	0	1
16	16.5	4	0	0	1
16	16.5	5	0	0	0
16	16.5	6	0	1	0
16	16.5	7	0	0	1
16	16.5	8	0	0	1
16	16.5	9	0	0	1
16	16.5	10	0	0	1
16	16.5	11	0	0	1
16	16.5	12	0	0	1
16	16.5	13	0	0	1
16	16.5	14	0	0	0
16	16.5	15	0	1	0
16	16.5	16	0	1	0
16	16.5	17	0	0	0
16	16.5	18	0	0	1
16	16.5	19	0	1	1
16	16.5	20	0	0	1
16	16.5	21	0	0	1
16	16.5	22	0	0	1
16	16.5	23	0	1	1
16	16.5	24	0	0	1
16	16.5	25	0	0	1
16	16.5	26	0	1	0
16	16.5	27	0	0	1
16	16.5	28	0	0	1
16	16.5	29	0	1	0
16	16.5	30	0	0	1
16	16.5	31	0	0	1
16	16.5	32	0	1	1
16	16.5	33	0	0	0
16	16.5	34	0	0	1
16	16.5	35	0	1	1
16	16.5	36	0	0	1
16	16.5	37	0	0	0
16	16.5	38	0	1	1
16	16.5	39	0	0	1
16	16.5	40	0	1	0
16	16.5	41	0	1	1
16	16.5	42	0	0	1
16	16.5	43	0	1	1
16.5	17	1	0	0	0
16.5	17	2	0	0	1
16.5	17	3	0	0	0
16.5	17	4	0	0	1
16.5	17	5	0	0	1
16.5	17	6	0	0	0
16.5	17	7	0	1	0
16.5	17	8	0	0	1
16.5	17	9	0	0	0
16.5	17	10	0	0	1
16.5	17	11	0	0	1
16.5	17	12	0	0	1
16.5	17	13	0	1	0
16.5	17	14	0	1	1
16.5	17	15	0	1	0
16.5	17	16	0	1	0
16.5	17	17	0	1	0
16.5	17	18	0	0	0
16.5	17	19	0	1	0
16.5	17	20	0	1	0
16.5	17	21	0	1	1
16.5	17	22	0	1	0
16.5	17	23	0	1	0
16.5	17	24	0	1	1
16.5	17	25	0	1	0
16.5	17	26	0	0	1
16.5	17	27	0	0	1
16.5	17	28	0	1	0
16.5	17	29	0	0	1
16.5	17	30	0	0	1
16.5	17	31	0	1	0
16.5	17	32	0	1	0
16.5	17	33	0	0	1
16.5	17	34	0	1	1
16.5	17	35	0	0	0
16.5	17	36	0	0	1
16.5	17	37	0	1	0
16.5	17	38	0	0	1
16.5	17	39	0	1	0
16.5	17	40	0	0	1
16.5	17	41	0	1	1
16.5	17	42	0	1	0
16.5	17	43	0	0	1
16.5	17	44	0	0	1
16.5	17	45	0	0	1
17	17.5	1	0	0	0
17	17.5	2	0	0	1
17	17.5	3	0	0	0
17	17.5	4	0	0	0
17	17.5	5	0	0	1
17	17.5	6	0	0	0
17	17.5	7	0	0	1
17	17.5	8	0	0	0
17	17.5	9	0	1	0
17	17.5	10	0	0	1
17	17.5	11	0	1	0
17	17.5	12	0	1	0
17	17.5	13	0	1	0
17	17.5	14	0	1	0
17	17.5	15	0	1	0
17	17.5	16	0	1	0
17	17.5	17	0	1	0
17	17.5	18	0	1	0
17	17.5	19	0	1	0
17	17.5	20	0	1	0
17	17.5	21	0	1	0
17	17.5	22	0	1	0
17	17.5	23	0	1	0
17	17.5	24	0	1	0
17	17.5	25	0	0	0
17	17.5	26	0	0	0
17	17.5	27	0	1	0
17	17.5	28	0	0	0
17	17.5	29	0	0	0
17	17.5	30	0	1	0
17	17.5	31	0	1	0
17	17.5	32	0	1	1
17	17.5	33	0	1	1
17	17.5	34	0	0	0
17	17.5	35	0	0	1
17	17.5	36	0	1	0
17	17.5	37	0	1	0
17	17.5	38	0	1	1
17	17.5	39	0	1	0
17	17.5	40	0	0	1
17	17.5	41	0	1	0
17	17.5	42	0	1	0
17.5	18	1	0	0	0
17.5	18	2	0	1	0
17.5	18	3	0	0	0
17.5	18	4	0	0	0
17.5	18	5	0	0	1
17.5	18	6	0	0	0
17.5	18	7	0	0	0
17.5	18	8	0	1	0
17.5	18	9	0	0	1
17.5	18	10	0	1	0
17.5	18	11	0	1	0
17.5	18	12	0	1	0
17.5	18	13	0	1	0
17.5	18	14	0	1	0
17.5	18	15	0	1	0
17.5	18	16	0	1	0
17.5	18	17	0	1	0
17.5	18	18	0	1	0
17.5	18	19	0	1	0
17.5	18	20	0	1	0
17.5	18	21	0	1	0
17.5	18	22	0	1	0
17.5	18	23	0	1	0
17.5	18	24	0	1	0
17.5	18	25	0	0	0
17.5	18	26	0	1	0
17.5	18	27	0	0	1
17.5	18	28	0	1	0
17.5	18	29	0	1	0
17.5	18	30	0	1	0
17.5	18	31	0	1	0
17.5	18	32	0	1	1
17.5	18	33	0	0	0
17.5	18	34	0	1	1
17.5	18	35	0	1	0
17.5	18	36	0	0	1
17.5	18	37	0	1	0
17.5	18	38	0	1	1
17.5	18	39	0	0	0
17.5	18	40	0	1	0
17.5	18	41	0	0	0
17.5	18	42	0	1	0
17.5	18	43	0	1	0
18	18.5	1	0	0	0
18	18.5	2	0	0	0
18	18.5	3	0	1	0
18	18.5	4	0	1	0
18	18.5	5	0	0	1
18	18.5	6	0	1	0
18	18.5	7	0	1	0
18	18.5	8	0	0	0
18	18.5	9	0	1	0
18	18.5	10	0	0	0
18	18.5	11	0	1	0
18	18.5	12	0	1	0
18	18.5	13	0	1	0
18	18.5	14	0	1	0
18	18.5	15	0	1	0
18	18.5	16	0	1	0
18	18.5	17	0	1	0
18	18.5	18	0	1	0
18	18.5	19	0	1	0
18	18.5	20	0	1	0
18	18.5	21	0	1	0
18	18.5	22	0	1	0
18	18.5	23	0	0	0
18	18.5	24	0	0	0
18	18.5	25	0	1	0
18	18.5	26	0	1	0
18	18.5	27	0	0	1
18	18.5	28	0	1	0
18	18.5	29	1	1	0
18	18.5	30	0	1	0
18	18.5	31	0	1	0
18	18.5	32	0	1	0
18	18.5	33	0	0	0
18	18.5	34	0	1	0
18	18.5	35	0	1	0
18	18.5	36	0	0	0
18	18.5	37	0	0	0
18	18.5	38	0	1	0
18	18.5	39	0	1	0
18	18.5	40	0	1	0
18	18.5	41	0	0	0
18	18.5	42	0	1	0
18	18.5	43	0	1	0
18.5	19	1	0	1	0
18.5	19	2	0	0	0
18.5	19	3	0	1	0
18.5	19	4	0	1	0
18.5	19	5	0	1	0
18.5	19	6	0	1	0
18.5	19	7	0	1	0
18.5	19	8	0	0	0
18.5	19	9	0	1	0
18.5	19	10	0	0	0
18.5	19	11	0	1	0
18.5	19	12	0	1	0
18.5	19	13	0	1	0
18.5	19	14	0	1	0
18.5	19	15	0	1	0
18.5	19	16	0	1	0
18.5	19	17	0	1	0
18.5	19	18	0	1	0
18.5	19	19	0	1	0
18.5	19	20	0	0	0
18.5	19	21	0	1	0
18.5	19	22	0	0	0
18.5	19	23	0	1	0
18.5	19	24	0	0	0
18.5	19	25	0	1	0
18.5	19	26	0	1	0
18.5	19	27	0	0	0
18.5	19	28	0	1	0
18.5	19	29	1	1	0
18.5	19	30	0	1	0
18.5	19	31	0	1	0
18.5	19	32	0	1	0
18.5	19	33	0	0	0
18.5	19	34	0	1	0
18.5	19	35	0	1	0
18.5	19	36	0	1	0
18.5	19	37	0	0	0
18.5	19	38	0	1	0
18.5	19	39	0	1	0
18.5	19	40	0	1	0
18.5	19	41	0	0	0
18.5	19	42	0	1	0
18.5	19	43	0	1	0
19	19.5	1	0	1	0
19	19.5	2	0	0	0
19	19.5	3	0	1	0
19	19.5	4	0	0	0
19	19.5	5	0	1	0
19	19.5	6	0	1	0
19	19.5	7	0	1	0
19	19.5	8	0	1	0
19	19.5	9	0	0	0
19	19.5	10	0	1	0
19	19.5	11	0	1	0
19	19.5	12	0	0	0
19	19.5	13	0	1	0
19	19.5	14	0	1	0
19	19.5	15	0	1	0
19	19.5	16	0	1	0
19	19.5	17	1	1	0
19	19.5	18	0	1	0
19	19.5	19	0	0	0
19	19.5	20	0	1	0
19	19.5	21	0	1	0
19	19.5	22	0	0	0
19	19.5	23	0	1	0
19	19.5	24	0	1	0
19	19.5	25	0	0	0
19	19.5	26	0	1	0
19	19.5	27	0	1	0
19	19.5	28	0	1	0
19	19.5	29	0	1	0
19	19.5	30	0	1	0
19	19.5	31	0	1	0
19	19.5	32	0	1	0
19	19.5	33	0	1	0
19	19.5	34	0	1	0
19	19.5	35	0	1	0
19	19.5	36	0	1	0
19	19.5	37	0	0	0
19	19.5	38	0	0	0
19	19.5	39	0	0	0
19	19.5	40	0	1	0
19	19.5	41	0	1	0
19	19.5	42	0	1	0
19	19.5	43	0	0	0
19.5	20	1	0	1	0
19.5	20	2	0	0	0
19.5	20	3	0	1	0
19.5	20	4	0	0	0
19.5	20	5	0	1	0
19.5	20	6	0	1	0
19.5	20	7	0	1	0
19.5	20	8	0	1	0
19.5	20	9	0	1	0
19.5	20	10	0	0	0
19.5	20	11	1	1	0
19.5	20	12	0	1	0
19.5	20	13	0	1	0
19.5	20	14	0	1	0
19.5	20	15	0	0	0
19.5	20	16	0	1	0
19.5	20	17	0	1	0
19.5	20	18	0	1	0
19.5	20	19	0	1	0
19.5	20	20	0	1	0
19.5	20	21	0	1	0
19.5	20	22	0	1	0
19.5	20	23	0	0	0
19.5	20	24	0	1	0
19.5	20	25	0	1	0
19.5	20	26	0	1	0
19.5	20	27	0	1	0
19.5	20	28	0	1	0
19.5	20	29	0	0	1
19.5	20	30	0	1	0
19.5	20	31	0	1	0
19.5	20	32	1	1	0
19.5	20	33	0	1	0
19.5	20	34	0	1	0
19.5	20	35	0	1	0
19.5	20	36	0	1	0
19.5	20	37	0	1	0
19.5	20	38	0	1	0
19.5	20	39	0	0	0
19.5	20	40	0	0	0
19.5	20	41	0	0	0
19.5	20	42	0	1	0
19.5	20	43	0	1	0
19.5	20	44	0	1	0
19.5	20	45	0	1	0
20	20.5	1	1	1	0
20	20.5	2	0	0	0
20	20.5	3	0	1	0
20	20.5	4	0	0	0
20	20.5	5	0	1	0
20	20.5	6	0	1	0
20	20.5	7	0	1	0
20	20.5	8	0	0	0
20	20.5	9	0	1	0
20	20.5	10	0	1	0
20	20.5	11	0	1	0
20	20.5	12	0	1	0
20	20.5	13	0	1	0
20	20.5	14	0	1	0
20	20.5	15	0	1	0
20	20.5	16	0	1	0
20	20.5	17	0	1	0
20	20.5	18	0	1	0
20	20.5	19	0	1	0
20	20.5	20	0	1	0
20	20.5	21	0	1	0
20	20.5	22	0	0	0
20	20.5	23	0	1	0
20	20.5	24	0	1	0
20	20.5	25	0	1	0
20	20.5	26	0	1	0
20	20.5	27	0	1	0
20	20.5	28	0	1	0
20	20.5	29	0	1	0
20	20.5	30	0	1	0
20	20.5	31	0	1	0
20	20.5	32	1	1	0
20	20.5	33	0	0	0
20	20.5	34	0	1	0
20	20.5	35	0	1	0
20	20.5	36	0	1	0
20	20.5	37	0	0	0
20	20.5	38	0	0	1
20	20.5	39	0	1	0
20	20.5	40	0	1	0
20	20.5	41	0	1	0
20	20.5	42	0	1	0
20	20.5	43	0	1	0
20.5	21	1	0	1	0
20.5	21	2	0	0	0
20.5	21	3	0	1	0
20.5	21	4	0	1	0
20.5	21	5	0	1	0
20.5	21	6	0	1	0
20.5	21	7	0	1	0
20.5	21	8	0	0	0
20.5	21	9	0	1	0
20.5	21	10	0	1	0
20.5	21	11	0	1	0
20.5	21	12	0	1	0
20.5	21	13	0	1	0
20.5	21	14	0	1	0
20.5	21	15	0	1	0
20.5	21	16	0	1	0
20.5	21	17	0	1	0
20.5	21	18	0	0	0
20.5	21	19	0	1	0
20.5	21	20	0	1	0
20.5	21	21	0	0	0
20.5	21	22	0	1	0
20.5	21	23	0	1	0
20.5	21	24	0	1	0
20.5	21	25	0	1	0
20.5	21	26	0	1	0
20.5	21	27	0	1	0
20.5	21	28	0	1	0
20.5	21	29	0	1	0
20.5	21	30	0	1	0
20.5	21	31	0	1	0
20.5	21	32	0	1	0
20.5	21	33	0	0	0
20.5	21	34	0	1	0
20.5	21	35	0	1	0
20.5	21	36	0	0	0
20.5	21	37	0	0	1
20.5	21	38	0	1	0
20.5	21	39	0	1	0
20.5	21	40	0	1	0
20.5	21	41	0	1	0
20.5	21	42	0	1	0
21	21.5	1	0	0	0
21	21.5	2	0	0	0
21	21.5	3	0	0	0
21	21.5	4	0	0	0
21	21.5	5	0	1	0
21	21.5	6	0	1	0
21	21.5	7	0	1	0
21	21.5	8	0	0	1
21	21.5	9	0	1	0
21	21.5	10	0	0	1
21	21.5	11	0	1	0
21	21.5	12	0	1	0
21	21.5	13	0	1	0
21	21.5	14	0	1	0
21	21.5	15	0	1	0
21	21.5	16	0	1	0
21	21.5	17	0	1	0
21	21.5	18	0	0	0
21	21.5	19	0	1	0
21	21.5	20	0	1	0
21	21.5	21	0	0	0
21	21.5	22	0	0	1
21	21.5	23	0	1	1
21	21.5	24	0	0	0
21	21.5	25	0	1	0
21	21.5	26	0	0	0
21	21.5	27	0	1	0
21	21.5	28	0	1	0
21	21.5	29	0	0	0
21	21.5	30	0	0	1
21	21.5	31	0	0	0
21	21.5	32	0	1	0
21	21.5	33	0	0	0
21	21.5	34	0	1	0
21	21.5	35	0	1	0
21	21.5	36	0	1	0
21	21.5	37	0	0	1
21	21.5	38	0	0	0
21	21.5	39	0	1	0
21	21.5	40	0	1	0
21	21.5	41	0	1	0
21	21.5	42	0	1	0
21.5	22	1	0	1	0
21.5	22	2	0	0	0
21.5	22	3	0	0	0
21.5	22	4	0	1	0
21.5	22	5	0	1	0
21.5	22	6	0	1	0
21.5	22	7	0	0	1
21.5	22	8	0	0	1
21.5	22	9	0	1	1
21.5	22	10	0	0	1
21.5	22	11	0	1	0
21.5	22	12	0	1	0
21.5	22	13	0	0	1
21.5	22	14	0	1	0
21.5	22	15	0	1	0
21.5	22	16	0	1	0
21.5	22	17	0	1	0
21.5	22	18	0	0	0
21.5	22	19	0	0	0
21.5	22	20	0	1	0
21.5	22	21	0	1	0
21.5	22	22	0	1	0
21.5	22	23	0	0	1
21.5	22	24	0	0	1
21.5	22	25	0	1	0
21.5	22	26	0	1	0
21.5	22	27	0	0	1
21.5	22	28	0	0	1
21.5	22	29	0	1	0
21.5	22	30	0	1	0
21.5	22	31	0	0	1
21.5	22	32	0	0	1
21.5	22	33	0	0	1
21.5	22	34	0	0	0
21.5	22	35	0	1	1
21.5	22	36	0	1	0
21.5	22	37	0	0	1
21.5	22	38	0	1	0
21.5	22	39	0	0	1
21.5	22	40	0	0	1
21.5	22	41	0	1	0
21.5	22	42	0	1	0
21.5	22	43	0	1	1
21.5	22	44	0	1	0
22	22.5	1	0	1	0
22	22.5	2	0	0	0
22	22.5	3	0	0	0
22	22.5	4	0	1	0
22	22.5	5	0	1	0
22	22.5	6	0	1	0
22	22.5	7	0	0	1
22	22.5	8	0	0	1
22	22.5	9	0	1	1
22	22.5	10	0	0	1
22	22.5	11	1	1	0
22	22.5	12	0	1	0
22	22.5	13	0	0	1
22	22.5	14	0	1	0
22	22.5	15	0	1	0
22	22.5	16	0	1	1
22	22.5	17	0	1	0
22	22.5	18	0	0	0
22	22.5	19	0	1	0
22	22.5	20	0	1	0
22	22.5	21	0	1	0
22	22.5	22	0	1	0
22	22.5	23	0	0	1
22	22.5	24	0	0	1
22	22.5	25	0	1	0
22	22.5	26	0	1	1
22	22.5	27	0	0	1
22	22.5	28	0	0	1
22	22.5	29	0	0	0
22	22.5	30	0	1	0
22	22.5	31	0	0	1
22	22.5	32	0	0	1
22	22.5	33	0	0	1
22	22.5	34	0	0	1
22	22.5	35	0	1	1
22	22.5	36	0	1	0
22	22.5	37	0	0	1
22	22.5	38	0	0	1
22	22.5	39	0	0	1
22	22.5	40	0	1	1
22	22.5	41	0	1	0
22	22.5	42	0	0	1
22	22.5	43	0	1	1
22	22.5	44	0	0	1
22.5	23	1	0	0	1
22.5	23	2	0	0	0
22.5	23	3	0	0	0
22.5	23	4	0	1	0
22.5	23	5	0	1	0
22.5	23	6	0	1	0
22.5	23	7	0	0	1
22.5	23	8	0	0	1
22.5	23	9	0	0	1
22.5	23	10	0	0	1
22.5	23	11	0	1	0
22.5	23	12	0	1	1
22.5	23	13	0	0	1
22.5	23	14	0	1	0
22.5	23	15	0	1	0
22.5	23	16	0	1	1
22.5	23	17	0	1	0
22.5	23	18	0	0	0
22.5	23	19	0	1	0
22.5	23	20	0	1	0
22.5	23	21	0	1	0
22.5	23	22	0	1	0
22.5	23	23	0	0	1
[truncated: 3,339 more rows]
