# Supplementary material for: High-throughput automated methods for classical and operant conditioning of Drosophila larvae
Source: eLife. 2022 Oct 28;11:e70015. doi: 10.7554/eLife.70015 (PMC9678368; doi:10.7554/eLife.70015)
Supplement: Figure 2—source data 2. [file elife-70015-fig2-data2.xlsx]

## Sheet: 69F06>CsChr-data
timeBinStart	timeBinStop	larva	boolRoll	boolBend	boolCrawl
0	5	1	1	1	1
0	5	2	0	1	1
0	5	3	0	0	1
0	5	4	0	0	1
0	5	5	0	0	1
0	5	6	0	0	1
0	5	7	0	1	1
0	5	8	0	0	1
0	5	9	0	1	0
0	5	10	0	1	0
0	5	11	0	0	0
0	5	12	0	0	1
0	5	13	0	0	1
0	5	14	0	1	1
0	5	15	0	0	1
0	5	16	0	1	1
0	5	17	0	1	1
0	5	18	0	0	1
0	5	19	0	0	1
0	5	20	0	1	1
0	5	21	0	1	1
0	5	22	0	0	1
0	5	23	0	0	1
0	5	24	0	1	1
0	5	25	0	1	1
0	5	26	0	0	1
0	5	27	0	0	1
0	5	28	0	0	1
0	5	29	0	1	1
0	5	30	0	1	1
0	5	31	0	0	1
0	5	32	0	1	0
0	5	33	0	1	1
0	5	34	0	1	0
0	5	35	1	1	1
0	5	36	0	1	0
0	5	37	0	1	1
0	5	38	0	1	1
0	5	39	0	0	1
0	5	40	0	1	1
0	5	41	0	1	1
0	5	42	0	1	1
0	5	43	0	0	1
0	5	44	0	1	1
5	10	1	0	0	1
5	10	2	0	0	1
5	10	3	0	1	1
5	10	4	0	0	1
5	10	5	0	0	1
5	10	6	0	0	1
5	10	7	0	1	1
5	10	8	0	1	1
5	10	9	0	1	0
5	10	10	0	1	1
5	10	11	0	0	1
5	10	12	0	0	1
5	10	13	0	0	1
5	10	14	0	0	1
5	10	15	0	0	1
5	10	16	0	0	1
5	10	17	0	0	1
5	10	18	0	1	1
5	10	19	0	0	1
5	10	20	0	0	1
5	10	21	0	1	1
5	10	22	0	0	1
5	10	23	0	1	1
5	10	24	0	1	0
5	10	25	0	0	1
5	10	26	0	0	1
5	10	27	0	0	1
5	10	28	0	1	0
5	10	29	0	0	0
5	10	30	0	0	1
5	10	31	0	1	1
5	10	32	0	1	1
5	10	33	0	1	1
5	10	34	1	1	1
5	10	35	0	1	1
5	10	36	0	1	0
5	10	37	0	0	1
5	10	38	0	0	1
5	10	39	0	1	1
5	10	40	0	1	1
5	10	41	0	0	1
10	15	1	0	0	1
10	15	2	0	1	1
10	15	3	0	0	1
10	15	4	0	0	1
10	15	5	0	1	1
10	15	6	0	1	0
10	15	7	0	0	1
10	15	8	0	0	1
10	15	9	0	0	1
10	15	10	1	1	1
10	15	11	0	0	1
10	15	12	0	0	1
10	15	13	0	0	1
10	15	14	0	1	1
10	15	15	0	0	1
10	15	16	0	1	1
10	15	17	0	1	1
10	15	18	0	1	1
10	15	19	0	1	1
10	15	20	0	0	1
10	15	21	1	1	0
10	15	22	0	1	1
10	15	23	0	1	1
10	15	24	0	0	0
10	15	25	0	1	1
10	15	26	0	1	1
10	15	27	0	1	1
10	15	28	0	1	1
10	15	29	1	1	1
10	15	30	0	1	1
10	15	31	0	1	1
10	15	32	0	1	1
10	15	33	0	0	1
10	15	34	0	0	1
10	15	35	0	1	1
15	20	1	1	1	1
15	20	2	1	1	1
15	20	3	1	1	1
15	20	4	1	1	1
15	20	5	0	1	1
15	20	6	1	1	0
15	20	7	1	1	0
15	20	8	1	1	1
15	20	9	1	1	1
15	20	10	1	1	1
15	20	11	1	1	1
15	20	12	1	1	1
15	20	13	0	1	0
15	20	14	1	1	0
15	20	15	1	1	1
15	20	16	0	1	1
15	20	17	1	1	1
15	20	18	0	1	1
15	20	19	0	1	0
15	20	20	1	1	1
15	20	21	1	1	1
15	20	22	1	1	1
15	20	23	0	1	1
15	20	24	1	1	1
15	20	25	1	1	1
15	20	26	0	1	1
15	20	27	1	1	1
15	20	28	1	1	1
15	20	29	1	1	1
15	20	30	1	1	0
15	20	31	0	1	1
15	20	32	1	1	1
15	20	33	1	1	0
15	20	34	1	1	1
15	20	35	1	1	1
20	25	1	0	1	1
20	25	2	0	1	1
20	25	3	1	1	1
20	25	4	0	1	1
20	25	5	1	1	1
20	25	6	1	1	0
20	25	7	0	1	0
20	25	8	0	1	1
20	25	9	1	1	0
20	25	10	0	1	0
20	25	11	0	1	1
20	25	12	1	1	1
20	25	13	0	1	0
20	25	14	1	1	0
20	25	15	1	1	1
20	25	16	0	1	1
20	25	17	1	1	1
20	25	18	1	1	0
20	25	19	0	1	1
20	25	20	0	1	1
20	25	21	0	0	1
20	25	22	0	1	1
20	25	23	0	1	1
20	25	24	0	1	1
20	25	25	0	1	1
20	25	26	0	1	1
20	25	27	0	1	0
20	25	28	0	1	0
20	25	29	1	1	1
20	25	30	1	1	0
20	25	31	1	1	1
20	25	32	0	1	0
20	25	33	1	1	0
20	25	34	0	1	1
20	25	35	1	1	1
20	25	36	1	1	1
25	30	1	0	1	1
25	30	2	0	0	1
25	30	3	0	0	1
25	30	4	0	0	1
25	30	5	0	0	1
25	30	6	0	0	1
25	30	7	0	1	1
25	30	8	0	1	0
25	30	9	0	0	1
25	30	10	0	1	1
25	30	11	0	1	1
25	30	12	0	1	1
25	30	13	0	0	1
25	30	14	0	0	1
25	30	15	0	1	1
25	30	16	0	1	1
25	30	17	0	0	1
25	30	18	0	0	1
25	30	19	0	0	1
25	30	20	0	1	1
25	30	21	0	1	0
25	30	22	0	0	1
25	30	23	0	0	1
25	30	24	0	1	1
25	30	25	0	0	1
25	30	26	0	0	1
25	30	27	0	0	1
25	30	28	0	0	1
25	30	29	0	1	0
25	30	30	0	1	1
25	30	31	0	0	1
25	30	32	1	1	1
25	30	33	0	1	1
25	30	34	0	1	1
25	30	35	0	1	1
25	30	36	0	0	1
25	30	37	0	0	1
25	30	38	0	0	0
25	30	39	0	1	1
25	30	40	0	0	1
30	35	1	1	1	1
30	35	2	1	1	1
30	35	3	1	1	1
30	35	4	0	1	1
30	35	5	0	1	1
30	35	6	1	1	0
30	35	7	1	1	0
30	35	8	1	1	1
30	35	9	1	1	1
30	35	10	1	1	1
30	35	11	1	1	1
30	35	12	1	1	1
30	35	13	0	1	1
30	35	14	0	1	0
30	35	15	0	1	1
30	35	16	1	1	0
30	35	17	0	1	0
30	35	18	1	1	0
30	35	19	0	1	1
30	35	20	1	1	1
30	35	21	1	1	1
30	35	22	1	1	0
30	35	23	0	1	0
30	35	24	1	1	1
30	35	25	0	1	0
30	35	26	1	1	1
30	35	27	1	1	1
30	35	28	0	1	1
30	35	29	1	1	0
30	35	30	1	1	0
30	35	31	1	1	1
35	40	1	0	1	1
35	40	2	0	1	1
35	40	3	1	1	1
35	40	4	0	1	1
35	40	5	0	1	0
35	40	6	1	1	1
35	40	7	0	1	1
35	40	8	0	1	0
35	40	9	0	1	1
35	40	10	0	1	1
35	40	11	0	1	1
35	40	12	0	1	1
35	40	13	0	1	0
35	40	14	0	1	1
35	40	15	0	0	1
35	40	16	0	1	1
35	40	17	1	1	1
35	40	18	1	1	1
35	40	19	1	1	0
35	40	20	0	1	1
35	40	21	0	1	1
35	40	22	0	1	1
35	40	23	0	1	1
35	40	24	0	1	1
35	40	25	0	1	0
35	40	26	0	1	1
35	40	27	0	1	0
35	40	28	0	1	1
35	40	29	1	1	0
35	40	30	0	1	0
35	40	31	0	1	1
35	40	32	0	1	1
35	40	33	0	1	0
35	40	34	0	1	1
35	40	35	0	1	1
35	40	36	1	1	0
40	45	1	0	1	1
40	45	2	0	1	1
40	45	3	0	0	1
40	45	4	0	0	1
40	45	5	0	0	1
40	45	6	0	1	1
40	45	7	0	1	1
40	45	8	0	0	1
40	45	9	0	1	0
40	45	10	0	0	1
40	45	11	0	1	1
40	45	12	0	0	1
40	45	13	0	0	1
40	45	14	0	1	1
40	45	15	0	1	1
40	45	16	0	0	1
40	45	17	0	1	1
40	45	18	0	0	1
40	45	19	1	1	1
40	45	20	1	1	1
40	45	21	0	1	0
40	45	22	0	1	1
40	45	23	0	0	1
40	45	24	0	1	0
40	45	25	0	0	1
40	45	26	0	1	1
40	45	27	0	0	1
40	45	28	0	1	1
40	45	29	0	1	1
40	45	30	0	1	1
40	45	31	0	1	1
40	45	32	0	0	1
40	45	33	0	0	0
40	45	34	0	1	1
40	45	35	0	0	1
40	45	36	0	0	1
40	45	37	0	0	1
45	50	1	0	1	0
45	50	2	1	1	1
45	50	3	0	1	1
45	50	4	1	1	1
45	50	5	0	1	0
45	50	6	0	1	1
45	50	7	1	1	0
45	50	8	0	1	1
45	50	9	1	1	1
45	50	10	1	1	1
45	50	11	1	1	1
45	50	12	0	1	0
45	50	13	1	1	1
45	50	14	1	1	1
45	50	15	0	1	1
45	50	16	1	1	1
45	50	17	1	1	1
45	50	18	0	1	1
45	50	19	0	1	0
45	50	20	1	1	0
45	50	21	0	1	1
45	50	22	1	1	1
45	50	23	0	1	1
45	50	24	0	1	1
45	50	25	1	1	0
45	50	26	1	1	1
45	50	27	1	1	1
45	50	28	0	1	1
45	50	29	1	1	0
45	50	30	1	1	1
45	50	31	0	1	1
45	50	32	1	1	1
45	50	33	1	1	1
45	50	34	1	1	1
50	55	1	1	1	1
50	55	2	0	1	1
50	55	3	1	1	0
50	55	4	0	1	1
50	55	5	0	1	1
50	55	6	0	1	1
50	55	7	0	1	1
50	55	8	1	1	0
50	55	9	1	1	1
50	55	10	0	1	0
50	55	11	1	1	1
50	55	12	0	1	0
50	55	13	1	1	1
50	55	14	0	1	1
50	55	15	0	1	1
50	55	16	0	1	1
50	55	17	0	1	0
50	55	18	0	1	1
50	55	19	1	1	1
50	55	20	0	0	1
50	55	21	1	1	1
50	55	22	1	1	1
50	55	23	0	1	1
50	55	24	0	1	1
50	55	25	0	1	1
50	55	26	0	0	1
50	55	27	0	1	1
50	55	28	1	1	0
50	55	29	0	1	1
50	55	30	0	1	1
50	55	31	1	1	1
50	55	32	0	1	0
50	55	33	0	1	1
50	55	34	1	1	1
50	55	35	0	1	1
50	55	36	0	1	1
50	55	37	0	0	1
50	55	38	1	1	1
50	55	39	1	1	0
50	55	40	1	1	0
55	60	1	0	0	1
55	60	2	0	0	1
55	60	3	0	1	1
55	60	4	0	0	1
55	60	5	0	1	1
55	60	6	0	0	1
55	60	7	0	0	1
55	60	8	0	0	1
55	60	9	0	0	1
55	60	10	0	1	0
55	60	11	0	0	1
55	60	12	0	1	1
55	60	13	0	0	1
55	60	14	0	0	1
55	60	15	0	0	1
55	60	16	0	1	1
55	60	17	0	1	1
55	60	18	0	0	1
55	60	19	0	0	1
55	60	20	0	0	1
55	60	21	0	0	1
55	60	22	1	1	1
55	60	23	0	1	1
55	60	24	0	0	1
55	60	25	0	0	1
55	60	26	0	1	0
55	60	27	0	1	0
55	60	28	0	0	0
55	60	29	0	0	1
55	60	30	0	0	0
55	60	31	0	0	1
55	60	32	0	1	1
55	60	33	0	1	1
55	60	34	1	1	1
55	60	35	0	0	1
55	60	36	0	1	1
55	60	37	0	1	1
55	60	38	0	0	1
55	60	39	0	0	1
55	60	40	0	1	1
55	60	41	0	0	1
55	60	42	0	1	1
55	60	43	0	0	0

## Sheet: 72F11>CsChr-data
timeBinStart	timeBinStop	larva	boolRoll	boolBend	boolCrawl
0	5	1	0	1	0
0	5	2	0	1	0
0	5	3	0	0	1
0	5	4	0	1	1
0	5	5	0	1	0
0	5	6	0	0	1
0	5	7	0	1	0
0	5	8	0	1	0
0	5	9	1	1	0
0	5	10	0	0	1
0	5	11	0	0	1
0	5	12	0	1	1
0	5	13	0	0	1
0	5	14	0	1	1
0	5	15	0	0	1
0	5	16	0	0	1
0	5	17	0	0	0
0	5	18	0	1	1
0	5	19	0	0	1
0	5	20	0	0	1
0	5	21	0	1	0
0	5	22	0	1	1
0	5	23	0	0	1
0	5	24	0	0	1
0	5	25	0	0	1
0	5	26	0	1	0
0	5	27	0	1	1
0	5	28	0	0	1
0	5	29	0	0	1
0	5	30	0	0	1
0	5	31	0	1	1
0	5	32	0	1	0
0	5	33	0	1	0
0	5	34	0	0	1
5	10	1	0	1	0
5	10	2	0	0	1
5	10	3	0	1	0
5	10	4	0	1	1
5	10	5	0	0	1
5	10	6	0	1	1
5	10	7	0	1	1
5	10	8	0	1	0
5	10	9	0	1	0
5	10	10	0	1	1
5	10	11	0	1	1
5	10	12	0	0	1
5	10	13	0	0	1
5	10	14	0	0	1
5	10	15	0	1	1
5	10	16	0	0	1
5	10	17	0	1	1
5	10	18	0	1	1
5	10	19	0	0	1
5	10	20	0	0	1
5	10	21	0	0	1
5	10	22	0	0	0
5	10	23	0	1	1
5	10	24	0	1	1
5	10	25	0	0	1
5	10	26	0	0	1
5	10	27	0	0	1
5	10	28	0	1	1
5	10	29	0	0	1
5	10	30	0	0	1
5	10	31	1	1	0
5	10	32	0	1	1
5	10	33	0	0	1
5	10	34	0	0	1
5	10	35	0	0	1
5	10	36	0	1	0
5	10	37	0	1	0
5	10	38	0	1	1
5	10	39	0	0	1
10	15	1	0	1	0
10	15	2	0	0	0
10	15	3	0	0	0
10	15	4	0	0	1
10	15	5	0	0	1
10	15	6	0	0	1
10	15	7	0	1	1
10	15	8	0	1	0
10	15	9	0	1	1
10	15	10	0	0	1
10	15	11	0	0	1
10	15	12	0	1	0
10	15	13	0	0	1
10	15	14	0	0	1
10	15	15	0	1	0
10	15	16	0	0	1
10	15	17	1	1	1
10	15	18	0	1	1
10	15	19	0	1	0
10	15	20	0	1	1
10	15	21	0	0	1
10	15	22	0	1	1
10	15	23	0	0	1
10	15	24	0	1	0
10	15	25	0	0	1
10	15	26	0	1	0
10	15	27	0	1	0
10	15	28	0	1	1
10	15	29	0	0	1
10	15	30	0	0	1
10	15	31	0	0	1
10	15	32	0	1	1
10	15	33	0	1	1
10	15	34	0	1	1
10	15	35	0	0	1
15	20	1	1	1	0
15	20	2	1	1	1
15	20	3	1	1	1
15	20	4	0	1	1
15	20	5	0	1	1
15	20	6	1	1	1
15	20	7	1	1	1
15	20	8	1	1	0
15	20	9	1	1	0
15	20	10	1	1	1
15	20	11	1	1	0
15	20	12	1	1	1
15	20	13	1	1	0
15	20	14	1	1	1
15	20	15	1	1	0
15	20	16	1	1	1
15	20	17	1	1	1
15	20	18	1	1	1
15	20	19	1	1	0
15	20	20	1	1	1
15	20	21	1	1	1
15	20	22	1	1	1
15	20	23	1	1	1
15	20	24	1	1	1
15	20	25	1	1	0
15	20	26	1	1	1
15	20	27	1	1	1
15	20	28	1	1	1
15	20	29	1	1	1
15	20	30	1	1	1
15	20	31	1	1	1
15	20	32	1	1	1
20	25	1	0	1	1
20	25	2	0	0	1
20	25	3	0	1	1
20	25	4	0	0	1
20	25	5	0	0	1
20	25	6	0	0	1
20	25	7	0	0	1
20	25	8	0	0	1
20	25	9	0	1	1
20	25	10	1	1	0
20	25	11	0	1	1
20	25	12	0	0	1
20	25	13	0	0	1
20	25	14	0	0	1
20	25	15	0	1	1
20	25	16	1	1	1
20	25	17	0	1	0
20	25	18	0	1	1
20	25	19	0	1	1
20	25	20	0	1	0
20	25	21	0	0	1
20	25	22	1	1	1
20	25	23	1	1	1
20	25	24	1	1	1
20	25	25	0	0	1
20	25	26	1	1	1
20	25	27	1	1	1
20	25	28	1	1	0
20	25	29	0	1	1
20	25	30	0	1	1
20	25	31	1	1	1
20	25	32	1	1	1
20	25	33	0	0	1
20	25	34	0	0	1
20	25	35	0	0	1
20	25	36	0	1	1
20	25	37	0	0	1
25	30	1	0	0	1
25	30	2	0	0	1
25	30	3	0	1	1
25	30	4	0	0	1
25	30	5	0	0	1
25	30	6	0	1	0
25	30	7	0	0	1
25	30	8	0	1	0
25	30	9	0	1	0
25	30	10	0	1	1
25	30	11	0	1	1
25	30	12	0	1	1
25	30	13	0	0	1
25	30	14	0	0	1
25	30	15	0	1	1
25	30	16	0	0	0
25	30	17	0	1	1
25	30	18	0	0	1
25	30	19	0	0	1
25	30	20	0	0	0
25	30	21	0	0	1
25	30	22	0	0	0
25	30	23	0	0	1
25	30	24	0	0	1
25	30	25	0	0	1
25	30	26	0	0	1
25	30	27	0	0	1
25	30	28	0	0	1
25	30	29	0	1	1
25	30	30	0	0	1
25	30	31	0	0	1
25	30	32	0	0	1
25	30	33	0	0	1
25	30	34	0	0	1
25	30	35	0	0	1
25	30	36	0	1	1
25	30	37	0	0	1
25	30	38	0	0	1
25	30	39	0	0	1
30	35	1	1	1	0
30	35	2	1	1	1
30	35	3	1	1	0
30	35	4	0	1	0
30	35	5	1	1	1
30	35	6	1	1	1
30	35	7	1	1	0
30	35	8	1	1	1
30	35	9	1	1	0
30	35	10	1	1	0
30	35	11	1	1	0
30	35	12	0	1	1
30	35	13	1	1	1
30	35	14	1	1	1
30	35	15	1	1	1
30	35	16	1	1	0
30	35	17	1	1	1
30	35	18	1	1	1
30	35	19	1	1	0
30	35	20	1	1	0
30	35	21	1	1	1
30	35	22	1	1	1
30	35	23	1	1	1
30	35	24	1	1	0
30	35	25	1	1	1
30	35	26	1	1	1
30	35	27	1	1	1
30	35	28	1	1	1
30	35	29	1	1	1
30	35	30	1	1	1
30	35	31	1	1	0
30	35	32	1	1	1
30	35	33	1	1	1
30	35	34	1	1	1
30	35	35	1	1	0
30	35	36	1	1	1
35	40	1	0	0	1
35	40	2	0	0	1
35	40	3	0	1	0
35	40	4	0	0	1
35	40	5	0	0	1
35	40	6	1	1	1
35	40	7	0	1	0
35	40	8	0	1	1
35	40	9	0	1	0
35	40	10	1	1	1
35	40	11	0	0	1
35	40	12	1	1	1
35	40	13	1	1	1
35	40	14	0	0	1
35	40	15	0	1	1
35	40	16	0	1	1
35	40	17	0	1	1
35	40	18	0	1	1
35	40	19	1	1	1
35	40	20	0	1	1
35	40	21	0	0	1
35	40	22	0	0	1
35	40	23	0	1	1
35	40	24	1	1	0
35	40	25	0	1	1
35	40	26	1	1	1
35	40	27	0	1	1
35	40	28	0	1	1
35	40	29	1	1	1
35	40	30	1	1	1
35	40	31	1	1	1
35	40	32	0	1	1
35	40	33	0	1	1
35	40	34	0	1	1
35	40	35	0	1	1
35	40	36	1	1	1
35	40	37	0	1	1
35	40	38	0	1	1
35	40	39	0	1	1
35	40	40	0	1	1
40	45	1	0	1	1
40	45	2	0	0	1
40	45	3	0	1	0
40	45	4	0	1	0
40	45	5	0	1	1
40	45	6	0	0	1
40	45	7	0	0	1
40	45	8	0	1	1
40	45	9	0	0	0
40	45	10	0	1	0
40	45	11	0	1	1
40	45	12	0	1	0
40	45	13	0	1	0
40	45	14	0	1	1
40	45	15	1	1	1
40	45	16	0	1	1
40	45	17	0	1	1
40	45	18	0	0	1
40	45	19	0	0	1
40	45	20	0	0	0
40	45	21	0	0	1
40	45	22	0	0	1
40	45	23	0	0	0
40	45	24	0	1	1
40	45	25	0	0	1
40	45	26	0	0	1
40	45	27	0	0	1
40	45	28	0	0	1
40	45	29	0	1	1
40	45	30	0	0	1
40	45	31	0	1	1
40	45	32	0	1	1
40	45	33	0	0	1
40	45	34	0	0	1
40	45	35	0	0	1
40	45	36	0	0	1
40	45	37	0	0	1
45	50	1	1	1	1
45	50	2	1	1	1
45	50	3	1	1	0
45	50	4	1	1	1
45	50	5	1	1	0
45	50	6	1	1	1
45	50	7	1	1	0
45	50	8	1	1	0
45	50	9	1	1	0
45	50	10	1	1	1
45	50	11	1	1	1
45	50	12	1	1	1
45	50	13	1	1	1
45	50	14	0	1	0
45	50	15	1	1	0
45	50	16	1	1	1
45	50	17	1	1	1
45	50	18	1	1	1
45	50	19	1	1	0
45	50	20	1	1	1
45	50	21	0	1	1
45	50	22	1	1	1
45	50	23	1	1	0
45	50	24	1	1	1
45	50	25	1	1	1
45	50	26	1	1	1
45	50	27	1	1	1
45	50	28	1	1	1
45	50	29	1	1	1
45	50	30	1	1	0
45	50	31	1	1	1
45	50	32	1	1	1
45	50	33	1	1	1
45	50	34	1	1	1
45	50	35	1	1	1
45	50	36	1	1	1
50	55	1	1	1	1
50	55	2	0	1	1
50	55	3	0	0	1
50	55	4	1	1	1
50	55	5	0	1	1
50	55	6	1	1	0
50	55	7	0	1	0
50	55	8	0	1	0
50	55	9	1	1	0
50	55	10	1	1	1
50	55	11	0	1	1
50	55	12	0	0	1
50	55	13	1	1	1
50	55	14	0	1	1
50	55	15	0	1	1
50	55	16	0	0	1
50	55	17	0	0	1
50	55	18	0	1	1
50	55	19	1	1	0
50	55	20	1	1	1
50	55	21	0	0	1
50	55	22	0	1	0
50	55	23	1	1	1
50	55	24	1	1	1
50	55	25	1	1	1
50	55	26	1	1	1
50	55	27	0	0	1
50	55	28	0	1	1
50	55	29	1	1	1
50	55	30	0	1	1
50	55	31	0	0	1
50	55	32	1	1	1
50	55	33	1	1	1
50	55	34	1	1	1
50	55	35	1	1	1
50	55	36	0	0	1
50	55	37	0	1	1
55	60	1	0	1	1
55	60	2	0	1	0
55	60	3	0	1	0
55	60	4	0	1	1
55	60	5	0	0	1
55	60	6	0	0	1
55	60	7	0	1	0
55	60	8	0	1	1
55	60	9	0	1	0
55	60	10	0	1	1
55	60	11	0	0	1
55	60	12	0	0	1
55	60	13	0	0	1
55	60	14	0	0	1
55	60	15	0	0	1
55	60	16	0	1	1
55	60	17	0	0	1
55	60	18	0	0	1
55	60	19	0	1	1
55	60	20	0	1	1
55	60	21	0	0	1
55	60	22	0	0	0
55	60	23	0	0	1
55	60	24	0	0	1
55	60	25	0	0	1
55	60	26	0	0	1
55	60	27	0	0	1
55	60	28	0	0	1
55	60	29	0	0	1
55	60	30	0	0	1
55	60	31	0	1	1
55	60	32	0	0	1
55	60	33	0	0	1
55	60	34	0	1	1
55	60	35	0	0	1
55	60	36	0	0	1
55	60	37	0	0	1

## Sheet: attP2>CsChr-data
timeBinStart	timeBinStop	larva	boolRoll	boolBend	boolCrawl
0	5	1	0	0	1
0	5	2	0	0	1
0	5	3	0	1	1
0	5	4	0	0	1
0	5	5	0	1	0
0	5	6	0	0	1
0	5	7	0	1	1
0	5	8	1	1	1
0	5	9	0	0	1
0	5	10	0	0	1
0	5	11	0	1	1
0	5	12	0	0	1
0	5	13	0	0	1
0	5	14	0	1	0
0	5	15	0	0	1
0	5	16	0	0	1
0	5	17	0	1	0
0	5	18	0	1	0
0	5	19	0	0	1
0	5	20	0	1	1
0	5	21	0	0	1
0	5	22	0	0	1
0	5	23	0	1	0
0	5	24	0	1	1
0	5	25	0	1	0
0	5	26	0	1	1
0	5	27	0	0	0
0	5	28	0	0	1
0	5	29	0	0	1
0	5	30	0	0	1
0	5	31	0	1	1
0	5	32	0	1	1
0	5	33	0	0	1
0	5	34	0	0	1
0	5	35	0	0	1
0	5	36	0	0	1
0	5	37	0	0	1
0	5	38	0	1	0
0	5	39	0	1	1
0	5	40	0	1	1
0	5	41	0	0	1
0	5	42	0	0	1
0	5	43	0	0	1
0	5	44	0	0	1
0	5	45	0	0	0
0	5	46	0	1	1
5	10	1	0	1	1
5	10	2	0	1	1
5	10	3	0	1	1
5	10	4	0	1	1
5	10	5	0	1	1
5	10	6	0	0	1
5	10	7	0	1	1
5	10	8	0	0	1
5	10	9	0	0	1
5	10	10	0	0	1
5	10	11	0	1	1
5	10	12	0	0	1
5	10	13	0	0	1
5	10	14	0	1	0
5	10	15	0	1	1
5	10	16	0	1	1
5	10	17	0	1	0
5	10	18	0	1	0
5	10	19	0	1	1
5	10	20	0	1	1
5	10	21	0	0	1
5	10	22	0	0	1
5	10	23	0	1	1
5	10	24	0	0	1
5	10	25	0	1	1
5	10	26	0	1	1
5	10	27	0	0	1
5	10	28	0	0	1
5	10	29	0	1	1
5	10	30	0	1	1
5	10	31	0	1	1
5	10	32	0	0	1
5	10	33	0	1	1
5	10	34	0	0	1
5	10	35	0	0	1
5	10	36	0	1	0
5	10	37	0	0	1
5	10	38	0	1	1
5	10	39	0	0	1
5	10	40	0	1	1
5	10	41	0	0	1
5	10	42	0	1	1
10	15	1	0	1	1
10	15	2	0	0	1
10	15	3	0	1	1
10	15	4	0	1	1
10	15	5	0	1	1
10	15	6	0	0	1
10	15	7	0	1	1
10	15	8	0	0	1
10	15	9	0	0	1
10	15	10	0	0	1
10	15	11	0	1	1
10	15	12	0	1	1
10	15	13	0	1	1
10	15	14	0	1	1
10	15	15	0	0	1
10	15	16	0	0	1
10	15	17	0	0	0
10	15	18	0	1	1
10	15	19	0	0	1
10	15	20	0	1	1
10	15	21	0	0	1
10	15	22	0	0	1
10	15	23	0	1	1
10	15	24	0	0	1
10	15	25	0	0	1
10	15	26	0	0	1
10	15	27	0	1	1
10	15	28	0	0	1
10	15	29	0	0	1
10	15	30	0	0	1
10	15	31	0	1	1
10	15	32	0	0	1
10	15	33	0	1	1
10	15	34	0	1	1
10	15	35	0	0	1
10	15	36	0	0	1
10	15	37	0	1	1
10	15	38	0	1	1
10	15	39	1	1	1
10	15	40	0	1	0
10	15	41	0	1	1
10	15	42	0	1	1
10	15	43	0	1	1
10	15	44	0	0	1
15	20	1	1	1	1
15	20	2	0	1	1
15	20	3	0	0	1
15	20	4	0	1	1
15	20	5	0	1	1
15	20	6	0	0	1
15	20	7	0	1	1
15	20	8	0	0	1
15	20	9	0	1	1
15	20	10	0	0	1
15	20	11	0	1	1
15	20	12	0	1	1
15	20	13	1	1	1
15	20	14	0	1	1
15	20	15	0	0	1
15	20	16	0	1	1
15	20	17	0	1	1
15	20	18	0	1	1
15	20	19	0	1	1
15	20	20	0	1	0
15	20	21	0	1	1
15	20	22	0	0	1
15	20	23	0	1	1
15	20	24	0	1	1
15	20	25	0	0	1
15	20	26	0	1	1
15	20	27	0	1	1
15	20	28	0	0	1
15	20	29	0	0	1
15	20	30	0	1	1
15	20	31	0	1	1
15	20	32	0	0	1
15	20	33	0	1	1
15	20	34	0	1	1
15	20	35	0	1	1
15	20	36	0	1	1
15	20	37	0	1	1
15	20	38	1	1	1
15	20	39	0	1	1
15	20	40	0	0	1
15	20	41	0	1	1
15	20	42	0	0	1
20	25	1	0	0	1
20	25	2	1	1	1
20	25	3	0	0	1
20	25	4	1	1	1
20	25	5	0	1	1
20	25	6	0	0	1
20	25	7	0	1	1
20	25	8	0	1	1
20	25	9	0	0	1
20	25	10	0	1	1
20	25	11	0	1	1
20	25	12	0	1	1
20	25	13	0	1	1
20	25	14	0	0	1
20	25	15	0	1	1
20	25	16	0	1	1
20	25	17	1	1	0
20	25	18	0	0	1
20	25	19	0	1	0
20	25	20	0	0	1
20	25	21	0	0	1
20	25	22	0	0	1
20	25	23	0	1	1
20	25	24	0	0	1
20	25	25	0	1	1
20	25	26	0	0	1
20	25	27	0	0	1
20	25	28	0	0	1
20	25	29	0	0	1
20	25	30	0	0	1
20	25	31	0	0	1
20	25	32	0	0	1
20	25	33	0	0	1
20	25	34	0	1	1
20	25	35	0	1	1
20	25	36	0	0	1
20	25	37	0	1	1
20	25	38	0	1	1
20	25	39	0	1	1
20	25	40	0	1	0
20	25	41	0	1	1
20	25	42	0	0	1
20	25	43	0	0	1
25	30	1	0	1	1
25	30	2	0	1	1
25	30	3	0	1	1
25	30	4	0	0	1
25	30	5	0	1	1
25	30	6	0	0	1
25	30	7	0	1	1
25	30	8	1	1	1
25	30	9	0	1	1
25	30	10	0	1	1
25	30	11	0	0	1
25	30	12	0	0	1
25	30	13	0	1	0
25	30	14	0	1	1
25	30	15	0	1	0
25	30	16	0	0	1
25	30	17	0	0	1
25	30	18	0	1	1
25	30	19	0	1	1
25	30	20	0	1	0
25	30	21	0	0	1
25	30	22	0	0	1
25	30	23	0	0	1
25	30	24	0	1	1
25	30	25	0	0	1
25	30	26	0	0	1
25	30	27	0	0	1
25	30	28	0	0	1
25	30	29	0	1	1
25	30	30	0	0	1
25	30	31	0	0	1
25	30	32	0	0	1
25	30	33	0	1	1
25	30	34	0	0	1
25	30	35	0	1	1
25	30	36	0	0	1
25	30	37	0	1	0
25	30	38	1	1	1
25	30	39	0	1	1
25	30	40	0	0	1
25	30	41	0	0	1
25	30	42	0	0	1
30	35	1	1	1	1
30	35	2	0	1	1
30	35	3	0	0	1
30	35	4	0	0	1
30	35	5	1	1	1
30	35	6	0	1	1
30	35	7	0	0	1
30	35	8	0	1	0
30	35	9	0	1	1
30	35	10	0	1	1
30	35	11	0	1	1
30	35	12	0	0	1
30	35	13	0	1	1
30	35	14	0	1	1
30	35	15	0	1	1
30	35	16	0	1	1
30	35	17	0	1	1
30	35	18	0	0	0
30	35	19	0	1	0
30	35	20	0	1	1
30	35	21	0	0	1
30	35	22	0	0	1
30	35	23	0	1	1
30	35	24	0	1	1
30	35	25	0	0	1
30	35	26	0	1	1
30	35	27	0	0	1
30	35	28	0	0	1
30	35	29	0	0	1
30	35	30	0	0	1
30	35	31	0	0	1
30	35	32	0	1	0
30	35	33	0	1	0
30	35	34	1	1	1
30	35	35	0	1	0
30	35	36	0	1	0
30	35	37	0	1	1
30	35	38	0	0	1
30	35	39	0	0	1
30	35	40	0	0	1
35	40	1	0	1	1
35	40	2	0	0	1
35	40	3	0	1	1
35	40	4	0	0	1
35	40	5	0	1	1
35	40	6	0	1	1
35	40	7	0	0	1
35	40	8	0	1	1
35	40	9	0	1	1
35	40	10	0	1	1
35	40	11	0	1	1
35	40	12	0	0	1
35	40	13	0	0	1
35	40	14	0	0	1
35	40	15	0	1	1
35	40	16	0	1	1
35	40	17	0	0	1
35	40	18	0	0	1
35	40	19	0	0	0
35	40	20	0	1	1
35	40	21	0	1	1
35	40	22	0	1	0
35	40	23	0	1	1
35	40	24	0	0	1
35	40	25	0	0	1
35	40	26	0	0	1
35	40	27	0	1	1
35	40	28	1	1	1
35	40	29	0	0	1
35	40	30	0	0	1
35	40	31	0	0	1
35	40	32	0	0	1
35	40	33	0	1	1
35	40	34	0	0	1
35	40	35	0	0	1
35	40	36	0	1	0
35	40	37	0	1	0
35	40	38	0	1	1
35	40	39	0	1	0
35	40	40	0	1	0
35	40	41	0	0	1
35	40	42	0	0	1
35	40	43	0	0	1
40	45	1	1	1	1
40	45	2	0	0	1
40	45	3	0	1	1
40	45	4	0	0	1
40	45	5	1	1	1
40	45	6	0	1	1
40	45	7	0	1	1
40	45	8	0	0	1
40	45	9	0	0	1
40	45	10	0	0	1
40	45	11	0	1	1
40	45	12	0	0	1
40	45	13	0	0	1
40	45	14	0	0	1
40	45	15	0	0	1
40	45	16	0	1	1
40	45	17	0	0	1
40	45	18	0	0	1
40	45	19	0	1	1
40	45	20	0	0	1
40	45	21	0	1	0
40	45	22	0	0	1
40	45	23	0	1	1
40	45	24	0	0	1
40	45	25	0	0	1
40	45	26	0	0	1
40	45	27	0	1	1
40	45	28	0	0	1
40	45	29	0	0	1
40	45	30	0	0	1
40	45	31	0	1	1
40	45	32	0	0	1
40	45	33	0	1	1
40	45	34	0	1	1
40	45	35	0	0	1
40	45	36	0	1	0
40	45	37	0	1	1
40	45	38	0	1	0
40	45	39	0	0	1
40	45	40	0	0	1
45	50	1	0	1	1
45	50	2	0	0	1
45	50	3	1	1	0
45	50	4	0	0	1
45	50	5	0	1	0
45	50	6	0	1	1
45	50	7	0	0	1
45	50	8	0	1	1
45	50	9	0	1	1
45	50	10	0	0	1
45	50	11	0	1	1
45	50	12	0	0	1
45	50	13	0	0	1
45	50	14	0	1	1
45	50	15	0	0	1
45	50	16	1	1	1
45	50	17	0	1	1
45	50	18	0	1	1
45	50	19	0	1	0
45	50	20	0	0	1
45	50	21	0	0	1
45	50	22	0	1	1
45	50	23	0	1	1
45	50	24	0	0	1
45	50	25	0	1	1
45	50	26	0	0	1
45	50	27	0	0	1
45	50	28	0	0	1
45	50	29	0	1	1
45	50	30	0	0	1
45	50	31	0	0	1
45	50	32	1	1	0
45	50	33	0	1	1
45	50	34	0	1	0
45	50	35	0	0	1
45	50	36	0	0	1
45	50	37	0	1	1
50	55	1	0	1	1
50	55	2	0	0	1
50	55	3	1	1	0
50	55	4	0	0	1
50	55	5	1	1	1
50	55	6	0	0	1
50	55	7	0	1	1
50	55	8	0	0	1
50	55	9	0	0	1
50	55	10	0	0	1
50	55	11	0	1	1
50	55	12	0	0	1
50	55	13	0	0	1
50	55	14	0	1	1
50	55	15	0	1	1
50	55	16	0	0	1
50	55	17	0	0	1
50	55	18	0	1	0
50	55	19	0	1	1
50	55	20	0	1	0
50	55	21	0	0	1
50	55	22	0	1	1
50	55	23	0	1	1
50	55	24	0	0	0
50	55	25	0	1	1
50	55	26	0	0	1
50	55	27	0	0	1
50	55	28	0	0	1
50	55	29	0	1	1
50	55	30	0	0	1
50	55	31	0	0	1
50	55	32	0	0	1
50	55	33	0	1	0
50	55	34	0	1	1
50	55	35	0	1	0
50	55	36	0	0	1
50	55	37	0	1	0
50	55	38	0	1	1
50	55	39	0	0	1
50	55	40	0	0	1
55	60	1	0	1	1
55	60	2	0	0	1
55	60	3	0	1	1
55	60	4	0	1	1
55	60	5	0	0	1
55	60	6	0	1	1
55	60	7	0	1	1
55	60	8	0	0	1
55	60	9	0	0	1
55	60	10	0	0	1
55	60	11	0	0	1
55	60	12	0	0	1
55	60	13	0	1	1
55	60	14	0	0	1
55	60	15	0	0	1
55	60	16	0	1	1
55	60	17	0	0	1
55	60	18	0	0	1
55	60	19	0	1	1
55	60	20	0	1	1
55	60	21	0	0	1
55	60	22	0	0	1
55	60	23	0	1	1
55	60	24	0	0	1
55	60	25	0	0	1
55	60	26	0	0	1
55	60	27	0	0	1
55	60	28	0	1	0
55	60	29	0	1	1
55	60	30	0	1	0
55	60	31	0	1	1
55	60	32	0	1	1
55	60	33	0	0	1
55	60	34	0	0	1

## Sheet: 69F06>dTrpA1-data
timeBinStart	timeBinStop	larva	boolRoll	boolBend	boolCrawl
0	5	1	0	1	1
0	5	2	0	0	1
0	5	3	0	1	1
0	5	4	0	1	1
0	5	5	0	1	1
0	5	6	0	1	1
0	5	7	0	1	1
0	5	8	0	1	1
0	5	9	0	1	1
0	5	10	0	1	1
0	5	11	0	1	0
0	5	12	0	1	1
0	5	13	1	1	1
0	5	14	0	1	1
0	5	15	0	1	1
0	5	16	0	1	1
0	5	17	0	1	1
0	5	18	0	1	1
0	5	19	0	1	1
0	5	20	0	1	1
0	5	21	0	0	1
0	5	22	0	1	1
0	5	23	0	1	0
0	5	24	0	1	1
0	5	25	0	1	1
0	5	26	0	1	1
0	5	27	0	0	1
0	5	28	0	1	1
0	5	29	0	1	1
0	5	30	0	1	1
0	5	31	0	0	1
0	5	32	0	0	1
0	5	33	0	0	1
0	5	34	0	1	1
0	5	35	0	0	1
0	5	36	0	0	1
0	5	37	0	0	1
0	5	38	0	1	1
5	10	1	0	0	1
5	10	2	0	1	1
5	10	3	0	1	1
5	10	4	0	1	1
5	10	5	0	1	1
5	10	6	0	1	1
5	10	7	0	1	1
5	10	8	0	1	1
5	10	9	0	1	1
5	10	10	0	1	1
5	10	11	0	1	1
5	10	12	0	1	1
5	10	13	0	1	1
5	10	14	1	1	1
5	10	15	0	1	1
5	10	16	0	0	1
5	10	17	0	1	1
5	10	18	0	0	1
5	10	19	0	1	1
5	10	20	0	1	1
5	10	21	0	1	1
5	10	22	0	1	1
5	10	23	0	0	1
5	10	24	0	1	1
5	10	25	0	1	1
5	10	26	0	1	1
5	10	27	0	0	1
5	10	28	0	1	0
5	10	29	0	1	1
5	10	30	0	0	1
5	10	31	0	0	1
5	10	32	0	1	1
5	10	33	1	1	1
5	10	34	0	1	1
5	10	35	0	0	1
5	10	36	1	1	1
5	10	37	0	1	1
5	10	38	0	1	1
10	15	1	0	0	1
10	15	2	0	0	1
10	15	3	0	1	1
10	15	4	0	1	1
10	15	5	0	0	1
10	15	6	0	0	1
10	15	7	0	1	1
10	15	8	0	1	1
10	15	9	0	1	1
10	15	10	0	1	1
10	15	11	0	0	1
10	15	12	1	1	0
10	15	13	0	0	1
10	15	14	0	1	1
10	15	15	0	1	1
10	15	16	0	1	1
10	15	17	0	0	1
10	15	18	1	1	1
10	15	19	0	1	1
10	15	20	0	1	1
10	15	21	0	0	1
10	15	22	0	0	1
10	15	23	0	1	1
10	15	24	0	1	1
10	15	25	0	1	1
10	15	26	0	0	1
10	15	27	0	1	1
10	15	28	0	1	1
10	15	29	0	0	1
10	15	30	0	0	1
10	15	31	0	1	1
10	15	32	0	1	1
10	15	33	0	1	1
10	15	34	0	0	1
10	15	35	0	1	0
10	15	36	1	1	1
10	15	37	0	1	0
15	20	1	0	1	1
15	20	2	1	1	1
15	20	3	0	1	1
15	20	4	1	1	0
15	20	5	1	1	1
15	20	6	1	1	0
15	20	7	0	1	1
15	20	8	0	1	1
15	20	9	0	1	1
15	20	10	0	1	1
15	20	11	1	1	1
15	20	12	0	1	1
15	20	13	1	1	0
15	20	14	1	1	1
15	20	15	1	1	0
15	20	16	1	1	1
15	20	17	1	1	0
15	20	18	1	1	0
15	20	19	1	1	1
15	20	20	0	1	1
15	20	21	1	1	1
15	20	22	1	1	1
15	20	23	0	1	1
15	20	24	1	1	1
15	20	25	1	1	1
15	20	26	1	1	1
15	20	27	1	1	1
15	20	28	0	1	1
15	20	29	1	1	1
15	20	30	1	1	1
15	20	31	1	1	1
15	20	32	0	1	1
15	20	33	1	1	1
15	20	34	0	1	0
20	25	1	1	1	1
20	25	2	1	1	0
20	25	3	1	1	0
20	25	4	1	1	0
20	25	5	1	1	1
20	25	6	1	1	1
20	25	7	1	1	1
20	25	8	0	1	0
20	25	9	1	1	0
20	25	10	0	1	0
20	25	11	1	1	1
20	25	12	1	1	1
20	25	13	1	1	1
20	25	14	1	1	0
20	25	15	1	1	1
20	25	16	1	1	1
20	25	17	1	1	1
20	25	18	1	1	1
20	25	19	1	1	1
20	25	20	1	1	0
20	25	21	1	1	1
20	25	22	1	1	1
20	25	23	0	1	1
20	25	24	1	1	1
20	25	25	1	1	1
20	25	26	1	1	1
20	25	27	1	1	1
20	25	28	1	1	0
20	25	29	1	1	0
20	25	30	1	1	1
20	25	31	0	1	1
20	25	32	1	1	1
20	25	33	1	1	1
20	25	34	1	1	1
20	25	35	1	1	1
20	25	36	0	1	1
25	30	1	0	0	1
25	30	2	1	1	1
25	30	3	0	1	1
25	30	4	0	1	1
25	30	5	1	1	1
25	30	6	0	0	1
25	30	7	0	1	1
25	30	8	1	1	1
25	30	9	0	1	1
25	30	10	0	1	1
25	30	11	0	1	1
25	30	12	0	0	1
25	30	13	0	1	1
25	30	14	0	1	1
25	30	15	0	1	1
25	30	16	0	1	0
25	30	17	0	0	1
25	30	18	0	1	1
25	30	19	0	1	1
25	30	20	1	1	1
25	30	21	0	1	1
25	30	22	0	1	1
25	30	23	0	1	1
25	30	24	0	0	1
25	30	25	0	1	1
25	30	26	0	1	1
25	30	27	0	1	1
25	30	28	0	1	1
25	30	29	1	1	1
25	30	30	0	1	1
25	30	31	1	1	1
25	30	32	0	0	1
25	30	33	0	1	1
25	30	34	0	1	1
25	30	35	0	1	1
25	30	36	0	1	1
25	30	37	1	1	1
25	30	38	0	1	1
25	30	39	0	0	1
30	35	1	1	1	1
30	35	2	1	1	1
30	35	3	1	1	1
30	35	4	1	1	1
30	35	5	1	1	1
30	35	6	1	1	1
30	35	7	1	1	1
30	35	8	0	1	1
30	35	9	0	1	1
30	35	10	1	1	1
30	35	11	1	1	1
30	35	12	1	1	1
30	35	13	0	1	1
30	35	14	1	1	1
30	35	15	0	1	1
30	35	16	1	1	0
30	35	17	0	0	1
30	35	18	1	1	1
30	35	19	1	1	0
30	35	20	1	1	1
30	35	21	0	0	1
30	35	22	1	1	1
30	35	23	1	1	1
30	35	24	1	1	1
30	35	25	1	1	1
30	35	26	1	1	0
30	35	27	0	1	1
30	35	28	1	1	1
30	35	29	1	1	1
30	35	30	1	1	1
30	35	31	0	0	1
30	35	32	0	1	1
30	35	33	1	1	1
30	35	34	1	1	1
30	35	35	1	1	1
30	35	36	1	1	1
30	35	37	1	1	1
30	35	38	1	1	1
35	40	1	1	1	1
35	40	2	1	1	0
35	40	3	1	1	0
35	40	4	1	1	1
35	40	5	0	1	0
35	40	6	1	1	0
35	40	7	1	1	1
35	40	8	0	1	1
35	40	9	1	1	1
35	40	10	1	1	1
35	40	11	0	1	1
35	40	12	1	1	1
35	40	13	0	1	1
35	40	14	1	1	1
35	40	15	0	1	1
35	40	16	1	1	1
35	40	17	0	1	0
35	40	18	1	1	0
35	40	19	0	1	1
35	40	20	1	1	1
35	40	21	1	1	0
35	40	22	1	1	1
35	40	23	1	1	1
35	40	24	0	1	1
35	40	25	1	1	1
35	40	26	1	1	1
35	40	27	1	1	1
35	40	28	0	1	1
35	40	29	1	1	0
35	40	30	0	1	1
35	40	31	1	1	1
35	40	32	1	1	1
35	40	33	1	1	1
35	40	34	1	1	1
35	40	35	0	1	1
35	40	36	0	1	0
35	40	37	1	1	1
40	45	1	0	0	1
40	45	2	0	1	1
40	45	3	0	1	1
40	45	4	0	0	1
40	45	5	0	1	0
40	45	6	0	1	1
40	45	7	0	1	1
40	45	8	0	0	1
40	45	9	0	0	1
40	45	10	0	0	1
40	45	11	0	0	1
40	45	12	0	1	1
40	45	13	0	1	1
40	45	14	0	1	1
40	45	15	0	0	1
40	45	16	0	1	1
40	45	17	0	0	1
40	45	18	0	1	1
40	45	19	1	1	0
40	45	20	0	1	1
40	45	21	1	1	1
40	45	22	0	1	1
40	45	23	0	1	1
40	45	24	0	0	1
40	45	25	0	1	1
40	45	26	0	1	1
40	45	27	0	0	1
40	45	28	0	1	1
40	45	29	0	1	1
40	45	30	0	0	1
40	45	31	0	0	1
40	45	32	1	1	1
40	45	33	0	0	1
40	45	34	0	0	1
40	45	35	0	1	1
40	45	36	0	1	1
40	45	37	0	0	1
40	45	38	0	0	1
40	45	39	0	0	1
40	45	40	0	1	1
45	50	1	0	1	1
45	50	2	1	1	1
45	50	3	1	1	1
45	50	4	1	1	1
45	50	5	0	1	1
45	50	6	1	1	1
45	50	7	1	1	1
45	50	8	1	1	1
45	50	9	1	1	1
45	50	10	0	1	1
45	50	11	0	1	1
45	50	12	1	1	1
45	50	13	1	1	1
45	50	14	1	1	1
45	50	15	1	1	1
45	50	16	0	1	0
45	50	17	1	1	1
45	50	18	1	1	1
45	50	19	1	1	1
45	50	20	1	1	1
45	50	21	1	1	1
45	50	22	1	1	1
45	50	23	0	0	1
45	50	24	0	0	1
45	50	25	0	1	1
45	50	26	1	1	0
45	50	27	1	1	1
45	50	28	1	1	1
45	50	29	1	1	1
45	50	30	0	1	1
45	50	31	0	1	1
45	50	32	1	1	1
45	50	33	0	1	1
45	50	34	1	1	1
45	50	35	1	1	1
45	50	36	1	1	1
45	50	37	1	1	1
45	50	38	1	1	1
45	50	39	1	1	1
45	50	40	0	1	1
45	50	41	1	1	0
50	55	1	0	1	0
50	55	2	1	1	1
50	55	3	1	1	1
50	55	4	1	1	1
50	55	5	1	1	1
50	55	6	1	1	1
50	55	7	1	1	0
50	55	8	1	1	1
50	55	9	1	1	1
50	55	10	1	1	1
50	55	11	1	1	1
50	55	12	0	1	1
50	55	13	1	1	1
50	55	14	0	1	1
50	55	15	1	1	1
50	55	16	1	1	1
50	55	17	1	1	1
50	55	18	1	1	0
50	55	19	0	1	1
50	55	20	1	1	0
50	55	21	1	1	1
50	55	22	0	0	1
50	55	23	0	0	1
50	55	24	1	1	1
50	55	25	1	1	1
50	55	26	0	1	1
50	55	27	1	1	1
50	55	28	1	1	1
50	55	29	1	1	1
50	55	30	1	1	1
50	55	31	1	1	1
50	55	32	1	1	0
50	55	33	1	1	0
50	55	34	1	1	1
50	55	35	0	1	1
50	55	36	1	1	1
50	55	37	1	1	1
50	55	38	0	1	1
55	60	1	0	1	1
55	60	2	0	0	1
55	60	3	0	0	1
55	60	4	0	0	1
55	60	5	1	1	0
55	60	6	1	1	1
55	60	7	0	0	0
55	60	8	0	0	1
55	60	9	0	1	1
55	60	10	0	0	1
55	60	11	0	0	1
55	60	12	0	0	1
55	60	13	0	1	1
55	60	14	0	0	1
55	60	15	0	0	1
55	60	16	0	0	1
55	60	17	0	1	0
55	60	18	0	1	1
55	60	19	0	0	1
55	60	20	0	1	1
55	60	21	0	1	1
55	60	22	0	1	1
55	60	23	0	0	1
55	60	24	0	1	1
55	60	25	0	0	1
55	60	26	0	1	1
55	60	27	0	1	1
55	60	28	0	1	1
55	60	29	0	1	1
55	60	30	0	1	1
55	60	31	0	1	1
55	60	32	0	1	1
55	60	33	0	1	1
55	60	34	0	1	1
55	60	35	0	0	1
55	60	36	0	1	1
55	60	37	0	0	1
55	60	38	0	1	1
55	60	39	0	0	1

## Sheet: 72F11>dTrpA1-data
timeBinStart	timeBinStop	larva	boolRoll	boolBend	boolCrawl
0	5	1	0	0	1
0	5	2	0	0	1
0	5	3	0	0	1
0	5	4	0	0	1
0	5	5	0	0	1
0	5	6	0	1	1
0	5	7	0	1	1
0	5	8	0	0	1
0	5	9	0	0	1
0	5	10	0	1	1
0	5	11	0	1	1
0	5	12	0	1	0
0	5	13	0	1	1
0	5	14	0	0	1
0	5	15	0	0	1
0	5	16	0	1	1
0	5	17	0	1	1
0	5	18	0	1	1
0	5	19	0	0	1
0	5	20	0	0	1
0	5	21	1	1	0
0	5	22	0	0	1
0	5	23	0	1	1
0	5	24	0	0	1
0	5	25	0	1	1
0	5	26	0	0	1
0	5	27	0	1	1
0	5	28	0	0	1
0	5	29	0	1	1
0	5	30	0	1	1
0	5	31	0	1	1
0	5	32	0	1	1
0	5	33	0	0	1
0	5	34	0	0	1
0	5	35	0	0	1
0	5	36	0	0	1
0	5	37	0	1	1
5	10	1	0	0	1
5	10	2	0	0	1
5	10	3	0	0	1
5	10	4	0	0	1
5	10	5	0	0	1
5	10	6	0	0	1
5	10	7	1	1	1
5	10	8	0	0	1
5	10	9	0	0	1
5	10	10	0	1	1
5	10	11	0	1	1
5	10	12	1	1	1
5	10	13	0	1	1
5	10	14	0	0	1
5	10	15	0	1	1
5	10	16	0	1	1
5	10	17	0	1	1
5	10	18	0	0	1
5	10	19	1	1	1
5	10	20	0	1	1
5	10	21	0	1	1
5	10	22	0	1	1
5	10	23	0	1	1
5	10	24	0	0	1
5	10	25	1	1	1
5	10	26	0	1	1
5	10	27	0	1	1
5	10	28	0	0	1
5	10	29	0	1	1
5	10	30	0	1	1
5	10	31	0	1	1
5	10	32	0	0	1
5	10	33	0	0	1
5	10	34	0	0	1
5	10	35	0	1	1
5	10	36	0	1	1
10	15	1	0	0	1
10	15	2	0	0	1
10	15	3	0	0	1
10	15	4	0	0	1
10	15	5	0	0	1
10	15	6	0	1	1
10	15	7	0	1	1
10	15	8	0	0	1
10	15	9	0	0	1
10	15	10	0	1	1
10	15	11	0	0	1
10	15	12	0	1	1
10	15	13	0	1	1
10	15	14	0	0	1
10	15	15	0	1	1
10	15	16	0	1	1
10	15	17	0	1	1
10	15	18	0	1	1
10	15	19	0	1	1
10	15	20	0	1	1
10	15	21	0	1	1
10	15	22	1	1	1
10	15	23	0	1	1
10	15	24	0	1	1
10	15	25	0	0	1
10	15	26	0	0	0
10	15	27	0	0	1
10	15	28	1	1	1
10	15	29	0	1	1
10	15	30	0	1	1
10	15	31	0	0	1
10	15	32	0	0	1
10	15	33	0	0	1
10	15	34	0	1	0
10	15	35	0	1	1
15	20	1	1	1	1
15	20	2	0	1	1
15	20	3	0	1	1
15	20	4	0	0	1
15	20	5	0	1	1
15	20	6	0	1	1
15	20	7	1	1	0
15	20	8	0	1	1
15	20	9	0	1	1
15	20	10	0	1	1
15	20	11	1	1	0
15	20	12	0	1	1
15	20	13	1	1	1
15	20	14	0	1	1
15	20	15	1	1	1
15	20	16	1	1	0
15	20	17	1	1	1
15	20	18	1	1	0
15	20	19	1	1	1
15	20	20	0	1	1
15	20	21	0	1	1
15	20	22	1	1	1
15	20	23	1	1	1
15	20	24	1	1	1
15	20	25	1	1	0
15	20	26	0	1	1
15	20	27	1	1	1
15	20	28	0	1	1
15	20	29	1	1	1
15	20	30	1	1	1
15	20	31	1	1	1
15	20	32	1	1	1
15	20	33	1	1	0
15	20	34	1	1	1
20	25	1	1	1	1
20	25	2	1	1	1
20	25	3	1	1	1
20	25	4	0	1	1
20	25	5	1	1	1
20	25	6	1	1	1
20	25	7	1	1	1
20	25	8	1	1	1
20	25	9	0	1	1
20	25	10	1	1	1
20	25	11	1	1	1
20	25	12	0	1	0
20	25	13	1	1	1
20	25	14	1	1	1
20	25	15	1	1	1
20	25	16	1	1	1
20	25	17	1	1	1
20	25	18	1	1	1
20	25	19	1	1	1
20	25	20	1	1	1
20	25	21	1	1	1
20	25	22	1	1	0
20	25	23	0	1	1
20	25	24	1	1	1
20	25	25	1	1	1
20	25	26	1	1	1
20	25	27	1	1	1
20	25	28	1	1	0
20	25	29	1	1	1
20	25	30	1	1	1
20	25	31	0	1	1
20	25	32	0	1	1
20	25	33	1	1	1
20	25	34	1	1	1
20	25	35	0	1	1
20	25	36	1	1	1
20	25	37	1	1	1
25	30	1	0	0	1
25	30	2	0	0	1
25	30	3	0	0	1
25	30	4	0	0	1
25	30	5	0	1	1
25	30	6	0	1	1
25	30	7	0	0	1
25	30	8	0	0	1
25	30	9	0	1	1
25	30	10	0	1	1
25	30	11	0	1	1
25	30	12	0	1	1
25	30	13	0	0	1
25	30	14	1	1	1
25	30	15	0	1	1
25	30	16	1	1	1
25	30	17	0	1	1
25	30	18	1	1	1
25	30	19	0	1	1
25	30	20	0	1	1
25	30	21	1	1	1
25	30	22	0	1	1
25	30	23	0	1	1
25	30	24	0	0	1
25	30	25	0	0	1
25	30	26	0	1	1
25	30	27	0	1	1
25	30	28	0	1	1
25	30	29	1	1	1
25	30	30	0	1	1
25	30	31	0	0	1
25	30	32	1	1	1
25	30	33	0	1	1
25	30	34	0	1	1
25	30	35	0	1	1
30	35	1	0	1	1
30	35	2	0	0	1
30	35	3	0	1	0
30	35	4	0	0	1
30	35	5	0	0	1
30	35	6	1	1	1
30	35	7	1	1	1
30	35	8	0	1	1
30	35	9	1	1	1
30	35	10	1	1	1
30	35	11	0	1	1
30	35	12	0	1	1
30	35	13	1	1	1
30	35	14	0	1	1
30	35	15	1	1	1
30	35	16	0	0	1
30	35	17	1	1	1
30	35	18	1	1	1
30	35	19	0	0	1
30	35	20	0	1	1
30	35	21	1	1	0
30	35	22	1	1	0
30	35	23	0	1	1
30	35	24	0	0	1
30	35	25	0	1	1
30	35	26	1	1	1
30	35	27	1	1	1
30	35	28	0	1	1
30	35	29	0	1	1
30	35	30	0	1	1
30	35	31	1	1	1
30	35	32	0	1	1
30	35	33	1	1	1
30	35	34	1	1	1
30	35	35	0	1	0
30	35	36	0	1	1
30	35	37	1	1	1
30	35	38	0	1	1
35	40	1	0	1	1
35	40	2	0	1	1
35	40	3	0	1	1
35	40	4	0	1	1
35	40	5	1	1	1
35	40	6	1	1	1
35	40	7	1	1	1
35	40	8	1	1	0
35	40	9	0	1	1
35	40	10	1	1	1
35	40	11	0	1	1
35	40	12	1	1	0
35	40	13	0	1	0
35	40	14	1	1	1
35	40	15	0	1	1
35	40	16	0	1	1
35	40	17	0	1	1
35	40	18	1	1	1
35	40	19	1	1	1
35	40	20	1	1	0
35	40	21	1	1	1
35	40	22	0	1	1
35	40	23	1	1	1
35	40	24	1	1	1
35	40	25	1	1	1
35	40	26	0	1	1
35	40	27	1	1	1
35	40	28	1	1	0
35	40	29	1	1	1
35	40	30	1	1	1
35	40	31	0	1	1
35	40	32	1	1	1
35	40	33	1	1	1
35	40	34	1	1	0
35	40	35	1	1	1
35	40	36	1	1	1
35	40	37	1	1	0
40	45	1	0	0	1
40	45	2	0	0	1
40	45	3	0	0	1
40	45	4	0	0	1
40	45	5	0	1	1
40	45	6	0	1	1
40	45	7	0	0	1
40	45	8	1	1	0
40	45	9	0	0	1
40	45	10	0	1	1
40	45	11	0	0	1
40	45	12	0	0	1
40	45	13	0	1	1
40	45	14	0	1	1
40	45	15	0	1	1
40	45	16	0	1	1
40	45	17	0	1	1
40	45	18	0	1	1
40	45	19	1	1	1
40	45	20	0	1	1
40	45	21	0	1	1
40	45	22	0	1	1
40	45	23	0	1	1
40	45	24	0	0	1
40	45	25	0	0	1
40	45	26	0	0	1
40	45	27	0	1	1
40	45	28	0	1	1
40	45	29	0	1	1
40	45	30	0	0	1
40	45	31	0	1	1
40	45	32	0	1	1
40	45	33	1	1	1
40	45	34	0	1	1
40	45	35	0	0	1
40	45	36	0	0	1
40	45	37	0	0	1
45	50	1	1	1	1
45	50	2	0	1	1
45	50	3	0	1	1
45	50	4	1	1	1
45	50	5	1	1	1
45	50	6	1	1	1
45	50	7	0	1	1
45	50	8	0	1	1
45	50	9	0	1	0
45	50	10	0	1	1
45	50	11	0	1	1
45	50	12	1	1	1
45	50	13	0	1	1
45	50	14	0	1	1
45	50	15	0	1	1
45	50	16	0	1	1
45	50	17	1	1	1
45	50	18	1	1	1
45	50	19	1	1	1
45	50	20	0	1	1
45	50	21	1	1	1
45	50	22	0	1	1
45	50	23	0	0	1
45	50	24	1	1	1
45	50	25	1	1	0
45	50	26	1	1	1
45	50	27	0	1	1
45	50	28	0	1	1
45	50	29	0	1	1
45	50	30	1	1	1
45	50	31	0	1	1
45	50	32	0	1	1
45	50	33	1	1	1
45	50	34	0	1	1
45	50	35	0	1	1
45	50	36	1	1	1
45	50	37	0	1	1
45	50	38	0	1	1
45	50	39	1	1	1
45	50	40	0	1	1
50	55	1	1	1	1
50	55	2	1	1	1
50	55	3	0	1	1
50	55	4	1	1	1
50	55	5	1	1	1
50	55	6	1	1	1
50	55	7	0	0	1
50	55	8	0	1	1
50	55	9	0	1	1
50	55	10	1	1	0
50	55	11	0	1	1
50	55	12	0	0	1
50	55	13	0	1	1
50	55	14	0	1	1
50	55	15	1	1	0
50	55	16	1	1	0
50	55	17	1	1	1
50	55	18	0	1	1
50	55	19	1	1	1
50	55	20	1	1	1
50	55	21	0	1	1
50	55	22	1	1	0
50	55	23	1	1	1
50	55	24	1	1	1
50	55	25	1	1	0
50	55	26	0	1	1
50	55	27	1	1	0
50	55	28	0	1	1
50	55	29	1	1	1
50	55	30	1	1	1
50	55	31	0	1	1
50	55	32	1	1	1
50	55	33	1	1	0
50	55	34	0	1	1
50	55	35	1	1	1
50	55	36	1	1	1
50	55	37	0	1	1
55	60	1	0	0	1
55	60	2	0	0	1
55	60	3	0	0	1
55	60	4	0	1	1
55	60	5	0	0	1
55	60	6	0	0	1
55	60	7	0	0	1
55	60	8	0	0	1
55	60	9	0	1	1
55	60	10	1	1	1
55	60	11	0	1	1
55	60	12	0	0	1
55	60	13	1	1	1
55	60	14	0	1	1
55	60	15	0	0	1
55	60	16	1	1	1
55	60	17	0	1	1
55	60	18	0	1	1
55	60	19	0	1	1
55	60	20	0	0	1
55	60	21	0	1	1
55	60	22	1	1	1
55	60	23	0	1	1
55	60	24	0	0	1
55	60	25	0	0	1
55	60	26	0	0	1
55	60	27	0	1	1
55	60	28	0	0	1
55	60	29	0	1	1
55	60	30	0	0	1
55	60	31	0	1	1
55	60	32	0	0	1
55	60	33	0	1	1
55	60	34	0	1	1
55	60	35	0	1	1
55	60	36	0	0	1
55	60	37	0	0	1

## Sheet: attP2>dTrpA1-data
timeBinStart	timeBinStop	larva	boolRoll	boolBend	boolCrawl
0	5	1	0	1	0
0	5	2	0	1	1
0	5	3	0	0	1
0	5	4	0	1	1
0	5	5	0	0	1
0	5	6	0	1	1
0	5	7	0	0	1
0	5	8	0	1	1
0	5	9	0	0	1
0	5	10	0	0	1
0	5	11	0	1	1
0	5	12	0	1	1
0	5	13	0	1	0
0	5	14	0	1	1
0	5	15	0	1	1
0	5	16	0	1	1
0	5	17	0	1	0
0	5	18	0	1	1
0	5	19	0	0	1
0	5	20	0	1	1
0	5	21	0	0	1
0	5	22	0	0	1
0	5	23	0	1	1
0	5	24	0	0	1
0	5	25	0	1	1
0	5	26	0	1	1
0	5	27	0	0	1
0	5	28	0	0	1
0	5	29	0	1	1
0	5	30	0	0	1
0	5	31	0	0	1
0	5	32	0	1	1
0	5	33	0	1	1
0	5	34	0	0	1
0	5	35	0	0	1
0	5	36	0	1	1
0	5	37	0	0	1
0	5	38	0	1	1
5	10	1	0	1	1
5	10	2	0	1	1
5	10	3	0	1	1
5	10	4	0	1	1
5	10	5	0	0	1
5	10	6	1	1	1
5	10	7	0	1	1
5	10	8	0	1	1
5	10	9	0	0	1
5	10	10	0	1	1
5	10	11	0	0	1
5	10	12	0	1	1
5	10	13	0	1	1
5	10	14	0	1	1
5	10	15	0	1	1
5	10	16	0	1	1
5	10	17	0	1	1
5	10	18	0	1	1
5	10	19	0	1	0
5	10	20	0	1	1
5	10	21	0	1	1
5	10	22	0	1	1
5	10	23	0	1	1
5	10	24	0	0	1
5	10	25	0	1	1
5	10	26	0	1	1
5	10	27	0	1	1
5	10	28	1	1	1
5	10	29	0	1	1
5	10	30	0	1	1
5	10	31	0	1	1
5	10	32	0	0	1
5	10	33	0	0	1
5	10	34	0	1	1
5	10	35	0	0	1
5	10	36	1	1	1
5	10	37	0	1	1
5	10	38	0	1	1
5	10	39	0	1	1
5	10	40	0	1	1
10	15	1	0	1	1
10	15	2	0	1	1
10	15	3	0	1	0
10	15	4	0	1	1
10	15	5	0	1	1
10	15	6	0	1	1
10	15	7	0	0	1
10	15	8	0	1	1
10	15	9	0	0	1
10	15	10	0	1	1
10	15	11	0	0	1
10	15	12	0	0	1
10	15	13	0	1	1
10	15	14	0	1	1
10	15	15	0	1	1
10	15	16	0	1	1
10	15	17	0	1	1
10	15	18	1	1	1
10	15	19	0	1	0
10	15	20	0	1	1
10	15	21	0	1	1
10	15	22	0	1	1
10	15	23	0	1	1
10	15	24	0	1	1
10	15	25	0	1	1
10	15	26	0	1	1
10	15	27	0	1	1
10	15	28	0	1	1
10	15	29	0	0	1
10	15	30	0	0	1
10	15	31	0	1	1
10	15	32	0	1	1
10	15	33	0	1	1
10	15	34	1	1	1
10	15	35	0	0	1
10	15	36	0	1	1
10	15	37	1	1	1
10	15	38	0	1	1
10	15	39	0	1	1
10	15	40	0	1	1
10	15	41	0	0	1
15	20	1	0	1	1
15	20	2	0	1	1
15	20	3	0	1	1
15	20	4	0	1	1
15	20	5	0	1	1
15	20	6	0	1	1
15	20	7	0	1	1
15	20	8	1	1	1
15	20	9	0	1	1
15	20	10	0	1	1
15	20	11	0	1	1
15	20	12	0	1	1
15	20	13	0	1	0
15	20	14	0	1	0
15	20	15	1	1	1
15	20	16	0	1	1
15	20	17	0	1	1
15	20	18	0	1	1
15	20	19	0	1	1
15	20	20	0	1	1
15	20	21	0	1	1
15	20	22	0	1	1
15	20	23	0	1	1
15	20	24	0	1	1
15	20	25	0	1	1
15	20	26	1	1	0
15	20	27	1	1	1
15	20	28	0	1	1
15	20	29	0	1	1
15	20	30	0	1	1
15	20	31	0	1	1
15	20	32	0	1	1
15	20	33	0	1	0
15	20	34	0	1	1
15	20	35	0	1	1
15	20	36	0	1	1
15	20	37	0	1	1
15	20	38	0	1	1
20	25	1	1	1	1
20	25	2	0	0	1
20	25	3	0	1	0
20	25	4	0	1	1
20	25	5	1	1	1
20	25	6	0	1	0
20	25	7	0	1	1
20	25	8	0	1	1
20	25	9	0	1	1
20	25	10	0	1	1
20	25	11	1	1	0
20	25	12	0	1	1
20	25	13	0	1	1
20	25	14	0	1	0
20	25	15	0	1	1
20	25	16	0	1	1
20	25	17	0	1	0
20	25	18	0	1	0
20	25	19	0	1	0
20	25	20	1	1	0
20	25	21	0	1	0
20	25	22	0	1	1
20	25	23	0	1	1
20	25	24	0	1	1
20	25	25	0	1	1
20	25	26	0	1	1
20	25	27	0	1	1
20	25	28	0	1	0
20	25	29	0	1	1
20	25	30	0	1	1
20	25	31	1	1	1
20	25	32	0	0	1
20	25	33	0	1	1
20	25	34	0	1	1
20	25	35	0	0	1
20	25	36	0	1	1
20	25	37	0	1	0
20	25	38	0	1	1
20	25	39	0	1	1
20	25	40	0	1	1
25	30	1	0	0	1
25	30	2	0	1	1
25	30	3	0	1	0
25	30	4	0	0	1
25	30	5	0	1	1
25	30	6	0	1	1
25	30	7	0	1	0
25	30	8	0	1	1
25	30	9	0	1	1
25	30	10	0	1	1
25	30	11	0	0	1
25	30	12	0	1	1
25	30	13	0	0	1
25	30	14	0	1	1
25	30	15	0	1	0
25	30	16	0	1	1
25	30	17	0	1	1
25	30	18	0	1	0
25	30	19	0	1	1
25	30	20	0	1	0
25	30	21	0	1	0
25	30	22	0	1	1
25	30	23	0	1	0
25	30	24	0	0	1
25	30	25	0	1	1
25	30	26	0	1	1
25	30	27	0	0	1
25	30	28	0	1	1
25	30	29	1	1	1
25	30	30	0	0	1
25	30	31	0	1	0
25	30	32	0	0	1
25	30	33	0	1	1
25	30	34	0	1	1
25	30	35	0	1	1
25	30	36	0	1	1
25	30	37	0	1	1
25	30	38	0	0	1
25	30	39	1	1	1
25	30	40	1	1	1
25	30	41	0	1	0
25	30	42	0	0	1
25	30	43	0	1	1
25	30	44	0	0	1
30	35	1	0	1	0
30	35	2	0	1	1
30	35	3	0	1	0
30	35	4	0	0	1
30	35	5	0	1	1
30	35	6	1	1	1
30	35	7	0	0	1
30	35	8	0	1	0
30	35	9	0	1	1
30	35	10	0	1	1
30	35	11	0	1	1
30	35	12	0	1	1
30	35	13	0	1	0
30	35	14	0	1	0
30	35	15	0	1	1
30	35	16	0	1	0
30	35	17	0	1	1
30	35	18	0	1	0
30	35	19	0	1	0
30	35	20	0	1	1
30	35	21	0	1	1
30	35	22	0	1	1
30	35	23	0	1	1
30	35	24	0	1	0
30	35	25	0	0	1
30	35	26	0	1	1
30	35	27	1	1	0
30	35	28	1	1	1
30	35	29	0	1	0
30	35	30	0	1	0
30	35	31	0	1	1
30	35	32	0	1	1
30	35	33	0	1	1
30	35	34	0	1	1
30	35	35	1	1	0
30	35	36	0	1	1
30	35	37	0	1	1
30	35	38	0	1	1
30	35	39	0	1	1
30	35	40	0	1	1
30	35	41	0	1	1
30	35	42	0	1	1
30	35	43	0	1	1
35	40	1	1	1	0
35	40	2	0	0	1
35	40	3	0	1	0
35	40	4	0	1	1
35	40	5	0	1	1
35	40	6	0	1	0
35	40	7	0	1	1
35	40	8	0	1	1
35	40	9	0	1	0
35	40	10	1	1	1
35	40	11	0	1	1
35	40	12	1	1	1
35	40	13	0	1	1
35	40	14	0	1	1
35	40	15	1	1	0
35	40	16	0	1	1
35	40	17	0	0	1
35	40	18	0	1	1
35	40	19	0	1	0
35	40	20	0	1	1
35	40	21	0	1	0
35	40	22	0	1	1
35	40	23	0	1	1
35	40	24	0	1	1
35	40	25	0	1	1
35	40	26	0	1	1
35	40	27	0	1	1
35	40	28	0	1	0
35	40	29	1	1	1
35	40	30	1	1	1
35	40	31	0	1	1
35	40	32	0	1	1
35	40	33	0	1	0
35	40	34	0	0	1
35	40	35	0	1	1
35	40	36	0	1	1
35	40	37	0	1	1
35	40	38	1	1	1
35	40	39	0	1	0
35	40	40	0	1	1
35	40	41	0	1	1
35	40	42	0	1	0
35	40	43	0	0	0
40	45	1	0	1	1
40	45	2	0	1	1
40	45	3	0	1	0
40	45	4	0	1	1
40	45	5	0	0	1
40	45	6	0	1	1
40	45	7	1	1	1
40	45	8	0	1	1
40	45	9	1	1	1
40	45	10	0	1	1
40	45	11	0	1	1
40	45	12	0	1	1
40	45	13	0	1	1
40	45	14	0	0	1
40	45	15	0	1	0
40	45	16	0	1	0
40	45	17	0	0	1
40	45	18	0	1	1
40	45	19	0	1	0
40	45	20	0	1	1
40	45	21	0	1	1
40	45	22	0	0	1
40	45	23	0	1	1
40	45	24	0	1	1
40	45	25	0	0	1
40	45	26	0	1	1
40	45	27	0	0	1
40	45	28	0	1	1
40	45	29	0	1	1
40	45	30	1	1	1
40	45	31	0	0	1
40	45	32	0	1	1
40	45	33	0	1	0
40	45	34	0	0	1
40	45	35	0	0	1
40	45	36	0	0	1
40	45	37	0	1	1
40	45	38	0	0	1
40	45	39	0	1	1
40	45	40	0	1	0
40	45	41	0	1	1
40	45	42	0	0	1
40	45	43	0	1	0
40	45	44	0	0	0
45	50	1	0	1	1
45	50	2	0	1	1
45	50	3	0	1	1
45	50	4	1	1	0
45	50	5	0	0	1
45	50	6	0	1	1
45	50	7	0	1	1
45	50	8	0	1	0
45	50	9	0	1	1
45	50	10	0	1	1
45	50	11	0	1	1
45	50	12	0	1	1
45	50	13	0	1	1
45	50	14	0	1	1
45	50	15	0	1	0
45	50	16	0	1	1
45	50	17	0	1	1
45	50	18	0	1	0
45	50	19	1	1	1
45	50	20	0	1	0
45	50	21	0	1	1
45	50	22	0	1	0
45	50	23	0	1	1
45	50	24	1	1	0
45	50	25	0	1	0
45	50	26	0	1	1
45	50	27	0	1	1
45	50	28	0	0	1
45	50	29	0	1	1
45	50	30	0	1	1
45	50	31	1	1	1
45	50	32	0	1	1
45	50	33	0	1	1
45	50	34	1	1	0
45	50	35	0	0	1
45	50	36	0	1	1
45	50	37	0	1	1
45	50	38	0	1	0
45	50	39	0	0	1
45	50	40	0	1	1
45	50	41	0	1	0
45	50	42	0	1	1
45	50	43	0	1	0
45	50	44	0	1	0
45	50	45	0	0	1
50	55	1	0	1	1
50	55	2	0	1	1
50	55	3	0	1	1
50	55	4	0	1	0
50	55	5	0	1	1
50	55	6	0	1	1
50	55	7	0	1	0
50	55	8	0	1	1
50	55	9	0	1	1
50	55	10	0	0	1
50	55	11	1	1	0
50	55	12	0	1	1
50	55	13	0	1	0
50	55	14	0	1	0
50	55	15	0	1	1
50	55	16	0	1	1
50	55	17	1	1	0
50	55	18	1	1	1
50	55	19	0	1	0
50	55	20	0	1	1
50	55	21	0	1	1
50	55	22	0	1	1
50	55	23	0	1	1
50	55	24	0	1	1
50	55	25	0	1	1
50	55	26	0	1	1
50	55	27	0	1	1
50	55	28	0	1	1
50	55	29	0	1	0
50	55	30	0	1	1
50	55	31	0	1	1
50	55	32	0	1	1
50	55	33	0	1	0
50	55	34	0	0	1
50	55	35	0	1	1
50	55	36	0	1	1
50	55	37	0	1	1
50	55	38	0	1	1
50	55	39	0	1	1
50	55	40	0	1	0
50	55	41	0	1	0
50	55	42	0	1	0
50	55	43	0	1	1
50	55	44	0	0	0
55	60	1	0	0	1
55	60	2	0	0	1
55	60	3	0	0	1
55	60	4	0	1	1
55	60	5	0	0	1
55	60	6	0	1	1
55	60	7	1	1	0
55	60	8	0	1	1
55	60	9	0	1	1
55	60	10	0	1	1
55	60	11	0	1	1
55	60	12	0	1	1
55	60	13	0	1	0
55	60	14	1	1	1
55	60	15	0	1	1
55	60	16	0	1	1
55	60	17	0	1	1
55	60	18	0	1	1
55	60	19	0	0	1
55	60	20	0	0	1
55	60	21	0	0	1
55	60	22	0	0	1
55	60	23	0	1	1
55	60	24	0	1	1
55	60	25	0	0	1
55	60	26	0	1	1
55	60	27	0	0	1
55	60	28	0	0	1
55	60	29	0	1	1
55	60	30	0	0	1
55	60	31	0	0	1
55	60	32	0	1	1
55	60	33	0	1	0
55	60	34	0	0	1
55	60	35	0	0	1
55	60	36	0	0	1
55	60	37	0	1	1
55	60	38	0	0	1
55	60	39	0	1	1
55	60	40	0	1	0
55	60	41	0	1	1
55	60	42	0	1	1
55	60	43	0	1	1
55	60	44	0	0	0
