# Supplementary material for: High-throughput automated methods for classical and operant conditioning of Drosophila larvae
Source: eLife. 2022 Oct 28;11:e70015. doi: 10.7554/eLife.70015 (PMC9678368; doi:10.7554/eLife.70015)
Supplement: Figure 2—source data 3. [file elife-70015-fig2-data3.xlsx]

## Sheet: 72F11>CsChr-roll-stats
timeBinStart	timeBinStop	fisherPval	oddsRatio
0	5	1	1.4
5	10	0.48	Inf
10	15	1	1.3
15	20	5e-15	200
20	25	0.03	4.9
25	30	0.49	0
30	35	1.4e-15	210
35	40	0.0012	16
40	45	1	0.53
45	50	6.1e-15	190
50	55	3.4e-05	16
55	60	1	Undef

## Sheet: 69F06>CsChr-roll-stats
timeBinStart	timeBinStop	fisherPval	oddsRatio
0	5	0.61	2.1
5	10	0.49	Inf
10	15	0.32	4
15	20	1.4e-10	44
20	25	0.00033	9.5
25	30	1	0.51
30	35	9.8e-08	26
35	40	0.02	10
40	45	1	1.1
45	50	7.2e-06	16
50	55	0.00067	11
55	60	0.5	Inf

## Sheet: 72F11>CsChr-bend-stats
timeBinStart	timeBinStop	fisherPval	oddsRatio
0	5	0.5	1.4
5	10	0.51	0.72
10	15	1	0.97
15	20	0.00076	Inf
20	25	0.5	1.4
25	30	0.068	0.39
30	35	6.5e-06	Inf
35	40	0.011	3.8
40	45	0.82	1.2
45	50	1.4e-06	Inf
50	55	0.0091	4
55	60	0.47	0.69

## Sheet: 69F06>CsChr-bend-stats
timeBinStart	timeBinStop	fisherPval	oddsRatio
0	5	0.21	1.9
5	10	0.19	0.53
10	15	0.51	1.4
15	20	0.00032	Inf
20	25	2.3e-06	33
25	30	0.67	0.82
30	35	2.3e-05	Inf
35	40	2.3e-06	33
40	45	0.37	1.6
45	50	1.8e-06	Inf
50	55	1.7e-05	14
55	60	0.82	0.83

## Sheet: 72F11>CsChr-crawl-stats
timeBinStart	timeBinStop	fisherPval	oddsRatio
0	5	0.2	0.51
5	10	0.22	0.41
10	15	0.0042	0.12
15	20	0.0043	0.073
20	25	0.7	0.62
25	30	0.51	0.58
30	35	0.075	0.38
35	40	0.74	1.5
40	45	0.11	0.29
45	50	0.16	0.41
50	55	1	1.1
55	60	0.43	0.4

## Sheet: 69F06>CsChr-crawl-stats
timeBinStart	timeBinStop	fisherPval	oddsRatio
0	5	0.57	1.5
5	10	0.74	0.76
10	15	0.65	0.51
15	20	0.02	0.098
20	25	0.0038	0.15
25	30	1	0.95
30	35	0.1	0.39
35	40	0.16	0.42
40	45	0.7	0.67
45	50	0.36	0.51
50	55	0.78	0.73
55	60	0.29	0.39

## Sheet: 72F11>dTrpA1-roll-stats
timeBinStart	timeBinStop	fisherPval	oddsRatio
0	5	0.49	Inf
5	10	0.7	1.5
10	15	1	0.77
15	20	1.6e-05	12
20	25	7.6e-10	30
25	30	0.17	2.8
30	35	0.00076	7.1
35	40	1e-05	9.5
40	45	1	1.2
45	50	0.0025	5.3
50	55	3.7e-07	20
55	60	0.4	2.5

## Sheet: 69F06>dTrpA1-roll-stats
timeBinStart	timeBinStop	fisherPval	oddsRatio
0	5	1	Inf
5	10	1	1.1
10	15	1	1.1
15	20	1.8e-06	16
20	25	6.3e-11	43
25	30	0.18	3
30	35	5.9e-10	31
35	40	3.5e-06	11
40	45	1	1.1
45	50	1.2e-08	19
50	55	7.1e-11	44
55	60	1	1.1

## Sheet: 72F11>dTrpA1-bend-stats
timeBinStart	timeBinStop	fisherPval	oddsRatio
0	5	0.49	0.69
5	10	0.025	0.3
10	15	0.044	0.32
15	20	0.47	0
20	25	0.24	Inf
25	30	0.8	0.83
30	35	0.29	0.4
35	40	0.12	Inf
40	45	0.35	0.62
45	50	0.21	4.9
50	55	1	1.3
55	60	0.51	0.73

## Sheet: 69F06>dTrpA1-bend-stats
timeBinStart	timeBinStop	fisherPval	oddsRatio
0	5	0.14	2.3
5	10	0.78	0.8
10	15	0.13	0.45
15	20	1	Undef
20	25	0.24	Inf
25	30	0.59	1.5
30	35	1	0.88
35	40	0.12	Inf
40	45	0.26	0.57
45	50	0.44	2.4
50	55	1	1.3
55	60	0.83	0.9

[truncated: 2 more sheets: 72F11>dTrpA1-crawl-stats, 69F06>dTrpA1-crawl-stats]
