# Supplementary material for: High-throughput automated methods for classical and operant conditioning of Drosophila larvae
Source: eLife. 2022 Oct 28;11:e70015. doi: 10.7554/eLife.70015 (PMC9678368; doi:10.7554/eLife.70015)
Supplement: Figure 2—source data 4. [file elife-70015-fig2-data4.csv]

	Time relative to IR laser onset (seconds)	Recorded temperature	larvaNum
200918	-29.9	23.64705882352941	198736664048
200919	-29.8	23.64705882352941	198736664048
200920	-29.7	23.64705882352941	198736664048
200921	-29.7	23.64705882352941	198736664048
200922	-29.6	23.64705882352941	198736664048
200923	-29.6	23.64705882352941	198736664048
200924	-29.5	23.64705882352941	198736664048
200925	-29.4	23.705882352941174	198736664048
200926	-29.4	23.705882352941174	198736664048
200927	-29.3	23.705882352941174	198736664048
200928	-29.3	23.705882352941174	198736664048
200929	-29.2	23.705882352941174	198736664048
200930	-29.1	23.705882352941174	198736664048
200931	-29.1	23.705882352941174	198736664048
200932	-29.0	23.705882352941174	198736664048
200933	-29.0	23.705882352941174	198736664048
200934	-28.9	23.764705882352942	198736664048
200935	-28.8	23.764705882352942	198736664048
200936	-28.8	23.764705882352942	198736664048
200937	-28.6	23.764705882352942	198736664048
200938	-28.6	23.764705882352942	198736664048
200939	-28.6	23.764705882352942	198736664048
200940	-28.5	23.64705882352941	198736664048
200941	-28.3	23.588235294117645	198736664048
200942	-28.3	23.588235294117645	198736664048
200943	-28.1	23.64705882352941	198736664048
200944	-28.0	23.64705882352941	198736664048
200945	-28.0	23.588235294117645	198736664048
200946	-27.9	23.588235294117645	198736664048
200947	-27.8	23.588235294117645	198736664048
200948	-27.8	23.588235294117645	198736664048
200949	-27.7	23.705882352941174	198736664048
200950	-27.6	23.705882352941174	198736664048
200951	-27.6	23.705882352941174	198736664048
200952	-27.6	23.764705882352942	198736664048
200953	-27.5	23.764705882352942	198736664048
200954	-27.4	23.764705882352942	198736664048
200955	-27.4	23.764705882352942	198736664048
200956	-27.3	23.764705882352942	198736664048
200957	-27.2	23.764705882352942	198736664048
200958	-27.2	23.64705882352941	198736664048
200959	-27.0	23.64705882352941	198736664048
200960	-26.9	23.64705882352941	198736664048
200961	-26.8	23.588235294117645	198736664048
200962	-26.8	23.588235294117645	198736664048
200963	-26.7	23.588235294117645	198736664048
200964	-26.6	23.588235294117645	198736664048
200965	-26.5	23.64705882352941	198736664048
200966	-26.4	23.64705882352941	198736664048
200967	-26.3	23.764705882352942	198736664048
200968	-26.2	23.764705882352942	198736664048
200969	-26.2	23.823529411764714	198736664048
200970	-26.1	23.823529411764714	198736664048
200971	-26.0	23.823529411764714	198736664048
200972	-25.9	23.764705882352942	198736664048
200973	-25.8	23.764705882352942	198736664048
200974	-25.7	23.764705882352942	198736664048
200975	-25.6	23.882352941176467	198736664048
200976	-25.5	23.882352941176467	198736664048
200977	-25.4	23.764705882352942	198736664048
200978	-25.3	23.764705882352942	198736664048
200979	-25.2	23.764705882352942	198736664048
200980	-25.1	23.764705882352942	198736664048
200981	-25.0	23.764705882352942	198736664048
200982	-24.9	23.764705882352942	198736664048
200983	-24.8	23.823529411764714	198736664048
200984	-24.7	23.823529411764714	198736664048
200985	-24.6	23.705882352941174	198736664048
200986	-24.5	23.705882352941174	198736664048
200987	-24.4	23.705882352941174	198736664048
200988	-24.3	23.588235294117645	198736664048
200989	-24.2	23.588235294117645	198736664048
200990	-24.1	23.529411764705888	198736664048
200991	-24.0	23.529411764705888	198736664048
200992	-23.9	23.411764705882355	198736664048
200993	-23.8	23.411764705882355	198736664048
200994	-23.7	23.470588235294123	198736664048
200995	-23.6	23.411764705882355	198736664048
200996	-23.5	23.411764705882355	198736664048
200997	-23.4	23.529411764705888	198736664048
200998	-23.3	23.529411764705888	198736664048
200999	-23.2	23.588235294117645	198736664048
201000	-23.0	23.588235294117645	198736664048
201001	-23.0	23.588235294117645	198736664048
201002	-22.9	23.588235294117645	198736664048
201003	-22.9	23.588235294117645	198736664048
201004	-22.8	23.588235294117645	198736664048
201005	-22.8	23.588235294117645	198736664048
201006	-22.7	23.588235294117645	198736664048
201007	-22.6	23.588235294117645	198736664048
201008	-22.6	23.64705882352941	198736664048
201009	-22.5	23.64705882352941	198736664048
201010	-22.4	23.64705882352941	198736664048
201011	-22.4	23.64705882352941	198736664048
201012	-22.3	23.64705882352941	198736664048
201013	-22.3	23.64705882352941	198736664048
201014	-22.2	23.64705882352941	198736664048
201015	-22.2	23.64705882352941	198736664048
201016	-22.1	23.64705882352941	198736664048
201017	-22.1	23.64705882352941	198736664048
201018	-22.0	23.64705882352941	198736664048
201019	-21.9	23.64705882352941	198736664048
201020	-21.8	23.705882352941174	198736664048
201021	-21.7	23.823529411764714	198736664048
201022	-21.6	23.705882352941174	198736664048
201023	-21.4	23.64705882352941	198736664048
201024	-21.3	23.64705882352941	198736664048
201025	-21.2	23.588235294117645	198736664048
201026	-21.1	23.588235294117645	198736664048
201027	-21.0	23.588235294117645	198736664048
201028	-20.9	23.588235294117645	198736664048
201029	-20.8	23.705882352941174	198736664048
201030	-20.7	23.705882352941174	198736664048
201031	-20.6	23.588235294117645	198736664048
201032	-20.4	23.588235294117645	198736664048
201033	-20.3	23.64705882352941	198736664048
201034	-20.2	23.588235294117645	198736664048
201035	-20.1	23.529411764705888	198736664048
201036	-20.0	23.705882352941174	198736664048
201037	-19.9	23.705882352941174	198736664048
201038	-19.8	23.705882352941174	198736664048
201039	-19.7	23.823529411764714	198736664048
201040	-19.5	23.823529411764714	198736664048
201041	-19.4	23.823529411764714	198736664048
201042	-19.3	23.764705882352942	198736664048
201043	-19.2	23.823529411764714	198736664048
201044	-19.1	23.823529411764714	198736664048
201045	-19.0	23.882352941176467	198736664048
201046	-18.9	23.882352941176467	198736664048
201047	-18.8	23.764705882352942	198736664048
201048	-18.7	23.705882352941174	198736664048
201049	-18.6	23.882352941176467	198736664048
201050	-18.5	23.823529411764714	198736664048
201051	-18.4	23.823529411764714	198736664048
201052	-18.3	24.0	198736664048
201053	-18.2	24.0	198736664048
201054	-18.1	23.94117647058824	198736664048
201055	-18.0	23.94117647058824	198736664048
201056	-17.9	23.94117647058824	198736664048
201057	-17.8	23.94117647058824	198736664048
201058	-17.7	23.882352941176467	198736664048
201059	-17.6	23.882352941176467	198736664048
201060	-17.5	23.94117647058824	198736664048
201061	-17.4	23.94117647058824	198736664048
201062	-17.3	23.94117647058824	198736664048
201063	-17.2	23.94117647058824	198736664048
201064	-17.1	23.94117647058824	198736664048
201065	-17.0	23.94117647058824	198736664048
201066	-16.9	23.94117647058824	198736664048
201067	-16.8	23.882352941176467	198736664048
201068	-16.7	23.882352941176467	198736664048
201069	-16.6	23.94117647058824	198736664048
201070	-16.5	23.882352941176467	198736664048
201071	-16.4	23.823529411764714	198736664048
201072	-16.3	23.823529411764714	198736664048
201073	-16.2	23.823529411764714	198736664048
201074	-16.1	23.823529411764714	198736664048
201075	-16.0	23.823529411764714	198736664048
201076	-15.9	23.882352941176467	198736664048
201077	-15.8	23.94117647058824	198736664048
201078	-15.7	23.94117647058824	198736664048
201079	-15.6	24.0	198736664048
201080	-15.5	24.0	198736664048
201081	-15.5	24.0	198736664048
201082	-15.4	24.0	198736664048
201083	-15.3	24.117647058823533	198736664048
201084	-15.2	24.117647058823533	198736664048
201085	-15.1	24.058823529411764	198736664048
201086	-15.0	24.0	198736664048
201087	-14.899999999999999	23.94117647058824	198736664048
201088	-14.8	23.94117647058824	198736664048
201089	-14.600000000000001	23.94117647058824	198736664048
201090	-14.5	23.94117647058824	198736664048
201091	-14.399999999999999	24.0	198736664048
201092	-14.3	24.0	198736664048
201093	-14.2	24.0	198736664048
201094	-14.100000000000001	24.058823529411764	198736664048
201095	-14.0	24.176470588235286	198736664048
201096	-13.899999999999999	24.176470588235286	198736664048
201097	-13.8	24.058823529411764	198736664048
201098	-13.7	24.117647058823533	198736664048
201099	-13.600000000000001	24.117647058823533	198736664048
201100	-13.5	24.176470588235286	198736664048
201101	-13.399999999999999	24.176470588235286	198736664048
201102	-13.3	24.0	198736664048
201103	-13.2	23.94117647058824	198736664048
201104	-13.100000000000001	23.94117647058824	198736664048
201105	-13.0	23.94117647058824	198736664048
201106	-12.899999999999999	23.94117647058824	198736664048
201107	-12.8	23.94117647058824	198736664048
201108	-12.7	23.94117647058824	198736664048
201109	-12.600000000000001	23.94117647058824	198736664048
201110	-12.5	23.94117647058824	198736664048
201111	-12.399999999999999	23.94117647058824	198736664048
201112	-12.3	23.882352941176467	198736664048
201113	-12.2	23.823529411764714	198736664048
201114	-12.100000000000001	23.705882352941174	198736664048
201115	-12.0	23.705882352941174	198736664048
201116	-11.899999999999999	23.764705882352942	198736664048
201117	-11.8	23.764705882352942	198736664048
201118	-11.7	23.823529411764714	198736664048
201119	-11.600000000000001	23.823529411764714	198736664048
201120	-11.399999999999999	23.94117647058824	198736664048
201121	-11.3	23.94117647058824	198736664048
201122	-11.100000000000001	23.94117647058824	198736664048
201123	-11.0	23.823529411764714	198736664048
201124	-10.899999999999999	23.94117647058824	198736664048
201125	-10.8	23.94117647058824	198736664048
201126	-10.7	23.94117647058824	198736664048
201127	-10.600000000000001	23.94117647058824	198736664048
201128	-10.5	23.94117647058824	198736664048
201129	-10.399999999999999	23.94117647058824	198736664048
201130	-10.3	23.882352941176467	198736664048
201131	-10.2	23.823529411764714	198736664048
201132	-10.100000000000001	23.764705882352942	198736664048
201133	-10.0	23.764705882352942	198736664048
201134	-9.899999999999999	23.764705882352942	198736664048
201135	-9.8	23.64705882352941	198736664048
201136	-9.7	23.64705882352941	198736664048
201137	-9.600000000000001	23.529411764705888	198736664048
201138	-9.5	23.529411764705888	198736664048
201139	-9.399999999999999	23.588235294117645	198736664048
201140	-9.3	23.588235294117645	198736664048
201141	-9.2	23.64705882352941	198736664048
201142	-9.100000000000001	23.64705882352941	198736664048
201143	-9.0	23.588235294117645	198736664048
201144	-8.899999999999999	23.705882352941174	198736664048
201145	-8.8	23.705882352941174	198736664048
201146	-8.7	23.705882352941174	198736664048
201147	-8.600000000000001	23.823529411764714	198736664048
201148	-8.5	23.764705882352942	198736664048
201149	-8.399999999999999	23.705882352941174	198736664048
201150	-8.3	23.705882352941174	198736664048
201151	-8.100000000000001	23.64705882352941	198736664048
201152	-8.0	23.588235294117645	198736664048
201153	-7.899999999999999	23.588235294117645	198736664048
201154	-7.800000000000001	23.588235294117645	198736664048
201155	-7.699999999999999	23.588235294117645	198736664048
201156	-7.600000000000001	23.64705882352941	198736664048
201157	-7.600000000000001	23.705882352941174	198736664048
201158	-7.5	23.705882352941174	198736664048
201159	-7.399999999999999	23.705882352941174	198736664048
201160	-7.399999999999999	23.705882352941174	198736664048
201161	-7.300000000000001	23.705882352941174	198736664048
201162	-7.300000000000001	23.705882352941174	198736664048
201163	-7.199999999999999	23.705882352941174	198736664048
201164	-7.100000000000001	23.64705882352941	198736664048
201165	-7.0	23.588235294117645	198736664048
201166	-6.899999999999999	23.588235294117645	198736664048
201167	-6.800000000000001	23.588235294117645	198736664048
201168	-6.699999999999999	23.588235294117645	198736664048
201169	-6.600000000000001	23.588235294117645	198736664048
201170	-6.5	23.64705882352941	198736664048
201171	-6.399999999999999	23.64705882352941	198736664048
201172	-6.300000000000001	23.764705882352942	198736664048
201173	-6.199999999999999	23.823529411764714	198736664048
201174	-6.199999999999999	23.823529411764714	198736664048
201175	-6.100000000000001	23.823529411764714	198736664048
201176	-6.0	23.823529411764714	198736664048
201177	-6.0	23.823529411764714	198736664048
201178	-5.899999999999999	23.823529411764714	198736664048
201179	-5.800000000000001	23.882352941176467	198736664048
201180	-5.699999999999999	23.823529411764714	198736664048
201181	-5.699999999999999	23.823529411764714	198736664048
201182	-5.600000000000001	23.823529411764714	198736664048
201183	-5.600000000000001	23.705882352941174	198736664048
201184	-5.5	23.705882352941174	198736664048
201185	-5.5	23.705882352941174	198736664048
201186	-5.399999999999999	23.64705882352941	198736664048
201187	-5.300000000000001	23.64705882352941	198736664048
201188	-5.300000000000001	23.64705882352941	198736664048
201189	-5.199999999999999	23.64705882352941	198736664048
201190	-5.199999999999999	23.705882352941174	198736664048
201191	-5.100000000000001	23.705882352941174	198736664048
201192	-5.100000000000001	23.705882352941174	198736664048
201193	-5.0	23.705882352941174	198736664048
201194	-4.899999999999999	23.705882352941174	198736664048
201195	-4.800000000000001	23.705882352941174	198736664048
201196	-4.699999999999999	23.705882352941174	198736664048
201197	-4.600000000000001	23.705882352941174	198736664048
201198	-4.399999999999999	23.64705882352941	198736664048
201199	-4.399999999999999	23.64705882352941	198736664048
201200	-4.300000000000001	23.705882352941174	198736664048
201201	-4.199999999999999	23.705882352941174	198736664048
201202	-4.100000000000001	23.64705882352941	198736664048
201203	-4.0	23.705882352941174	198736664048
201204	-3.8000000000000007	23.705882352941174	198736664048
201205	-3.8000000000000007	23.764705882352942	198736664048
201206	-3.6999999999999993	23.705882352941174	198736664048
201207	-3.6000000000000014	23.588235294117645	198736664048
201208	-3.5	23.64705882352941	198736664048
201209	-3.3999999999999986	23.705882352941174	198736664048
201210	-3.3000000000000007	23.64705882352941	198736664048
201211	-3.1999999999999993	23.588235294117645	198736664048
201212	-3.0	23.470588235294123	198736664048
201213	-3.0	23.470588235294123	198736664048
201214	-2.8999999999999986	23.529411764705888	198736664048
201215	-2.8000000000000007	23.588235294117645	198736664048
201216	-2.6999999999999993	23.588235294117645	198736664048
201217	-2.6000000000000014	23.588235294117645	198736664048
201218	-2.5	23.588235294117645	198736664048
201219	-2.3999999999999986	23.64705882352941	198736664048
201220	-2.3000000000000007	23.588235294117645	198736664048
201221	-2.1000000000000014	23.64705882352941	198736664048
201222	-2.1000000000000014	23.588235294117645	198736664048
201223	-2.0	23.588235294117645	198736664048
201224	-1.8999999999999986	23.64705882352941	198736664048
201225	-1.8000000000000007	23.64705882352941	198736664048
201226	-1.6999999999999993	23.588235294117645	198736664048
201227	-1.5	23.588235294117645	198736664048
201228	-1.3999999999999986	23.588235294117645	198736664048
201229	-1.3000000000000007	23.588235294117645	198736664048
201230	-1.1999999999999993	23.529411764705888	198736664048
201231	-1.1000000000000014	23.588235294117645	198736664048
201232	-1.0	23.588235294117645	198736664048
201233	-0.8999999999999986	23.705882352941174	198736664048
201234	-0.8000000000000007	23.705882352941174	198736664048
201235	-0.6999999999999993	23.705882352941174	198736664048
201236	-0.6000000000000014	23.35294117647059	198736664048
201237	-0.5	23.35294117647059	198736664048
201238	-0.3999999999999986	23.411764705882355	198736664048
201239	-0.3000000000000007	23.411764705882355	198736664048
201240	-0.1999999999999993	23.35294117647059	198736664048
201241	-0.1999999999999993	23.35294117647059	198736664048
201242	0.0	23.529411764705888	198736664048
201243	0.1999999999999993	23.588235294117645	198736664048
201244	0.3000000000000007	23.588235294117645	198736664048
201245	0.3999999999999986	23.882352941176467	198736664048
201246	0.5	23.882352941176467	198736664048
201247	0.6999999999999993	24.35294117647059	198736664048
201248	0.8000000000000007	24.705882352941174	198736664048
201249	0.8999999999999986	25.117647058823533	198736664048
201250	1.0	25.176470588235286	198736664048
201251	1.1000000000000014	25.470588235294123	198736664048
201252	1.2999999999999972	25.64705882352941	198736664048
201253	1.3999999999999986	25.64705882352941	198736664048
201254	1.3999999999999986	25.94117647058824	198736664048
201255	1.5	25.94117647058824	198736664048
201256	1.6000000000000014	26.0	198736664048
201257	1.7999999999999972	26.058823529411764	198736664048
201258	1.8999999999999986	26.294117647058826	198736664048
201259	1.8999999999999986	26.411764705882355	198736664048
201260	2.0	26.94117647058824	198736664048
201261	2.1000000000000014	27.058823529411764	198736664048
201262	2.299999999999997	27.235294117647058	198736664048
201263	2.3999999999999986	27.294117647058826	198736664048
201264	2.5	27.235294117647058	198736664048
201265	2.6000000000000014	27.235294117647058	198736664048
201266	2.700000000000003	27.411764705882355	198736664048
201267	2.799999999999997	27.235294117647058	198736664048
201268	2.8999999999999986	27.70588235294117	198736664048
201269	3.0	27.823529411764714	198736664048
201270	3.0	27.823529411764714	198736664048
201271	3.1000000000000014	28.0	198736664048
201272	3.200000000000003	28.058823529411764	198736664048
201273	3.299999999999997	28.35294117647059	198736664048
201274	3.3999999999999986	28.529411764705888	198736664048
201275	3.5	28.64705882352941	198736664048
201276	3.5	28.470588235294123	198736664048
201277	3.6000000000000014	28.470588235294123	198736664048
201278	3.700000000000003	28.529411764705888	198736664048
201279	3.700000000000003	28.64705882352941	198736664048
201280	3.799999999999997	28.64705882352941	198736664048
201281	3.8999999999999986	28.588235294117645	198736664048
201282	4.0	28.882352941176467	198736664048
201283	4.100000000000001	29.294117647058826	198736664048
201284	4.200000000000003	29.35294117647059	198736664048
201285	4.299999999999997	29.411764705882355	198736664048
201286	4.399999999999999	28.705882352941174	198736664048
201287	4.5	28.64705882352941	198736664048
201288	4.5	28.823529411764714	198736664048
201289	4.600000000000001	29.176470588235297	198736664048
201290	4.700000000000003	29.176470588235297	198736664048
201291	4.799999999999997	29.117647058823533	198736664048
201292	4.899999999999999	29.0	198736664048
201293	5.0	29.235294117647058	198736664048
201294	5.0	29.235294117647058	198736664048
201295	5.100000000000001	29.117647058823533	198736664048
201296	5.200000000000003	29.235294117647058	198736664048
201297	5.299999999999997	29.411764705882355	198736664048
201298	5.399999999999999	28.764705882352942	198736664048
201299	5.5	29.470588235294123	198736664048
201300	5.600000000000001	29.470588235294123	198736664048
201301	5.700000000000003	29.588235294117645	198736664048
201302	5.799999999999997	29.64705882352941	198736664048
201303	6.0	29.0	198736664048
201304	6.0	28.94117647058824	198736664048
201305	6.100000000000001	29.64705882352941	198736664048
201306	6.200000000000003	29.117647058823533	198736664048
201307	6.399999999999999	29.058823529411764	198736664048
201308	6.399999999999999	29.176470588235297	198736664048
201309	6.5	29.176470588235297	198736664048
201310	6.600000000000001	29.294117647058826	198736664048
201311	6.700000000000003	29.411764705882355	198736664048
201312	6.899999999999999	29.235294117647058	198736664048
201313	6.899999999999999	29.294117647058826	198736664048
201314	7.0	28.64705882352941	198736664048
201315	7.100000000000001	28.764705882352942	198736664048
201316	7.200000000000003	28.058823529411764	198736664048
201317	7.299999999999997	28.235294117647058	198736664048
201318	7.399999999999999	28.294117647058826	198736664048
201319	7.700000000000003	28.0	198736664048
201320	7.799999999999997	28.176470588235286	198736664048
201321	7.899999999999999	27.64705882352941	198736664048
201322	8.0	27.823529411764714	198736664048
201323	8.100000000000001	27.882352941176467	198736664048
201324	8.200000000000003	27.882352941176467	198736664048
201325	8.299999999999997	27.94117647058824	198736664048
201326	8.399999999999999	27.823529411764714	198736664048
201327	8.5	26.882352941176467	198736664048
201328	8.600000000000001	27.0	198736664048
201329	8.700000000000003	27.117647058823533	198736664048
201330	8.799999999999997	27.35294117647059	198736664048
201331	8.899999999999999	27.411764705882355	198736664048
201332	9.0	27.64705882352941	198736664048
201333	9.100000000000001	27.411764705882355	198736664048
201334	9.200000000000003	27.117647058823533	198736664048
201335	9.399999999999999	27.235294117647058	198736664048
201336	9.399999999999999	27.176470588235286	198736664048
201337	9.600000000000001	26.882352941176467	198736664048
201338	9.700000000000003	27.529411764705888	198736664048
201339	9.799999999999997	27.470588235294123	198736664048
201340	10.0	27.470588235294123	198736664048
201341	10.100000000000001	27.70588235294117	198736664048
201342	10.200000000000003	27.70588235294117	198736664048
201343	10.299999999999997	27.0	198736664048
201344	10.399999999999999	27.470588235294123	198736664048
201345	10.5	27.70588235294117	198736664048
201346	10.600000000000001	27.882352941176467	198736664048
201347	10.700000000000003	28.058823529411764	198736664048
201348	10.700000000000003	27.94117647058824	198736664048
201349	10.899999999999999	26.823529411764714	198736664048
201350	10.899999999999999	26.823529411764714	198736664048
201351	11.0	26.882352941176467	198736664048
201352	11.100000000000001	26.94117647058824	198736664048
201353	11.200000000000003	26.94117647058824	198736664048
201354	11.299999999999997	27.235294117647058	198736664048
201355	11.399999999999999	27.235294117647058	198736664048
201356	11.5	26.823529411764714	198736664048
201357	11.600000000000001	26.882352941176467	198736664048
201358	11.700000000000003	26.94117647058824	198736664048
201359	11.799999999999997	27.235294117647058	198736664048
201360	11.899999999999999	27.470588235294123	198736664048
201361	12.0	27.470588235294123	198736664048
201362	12.100000000000001	27.470588235294123	198736664048
201363	12.299999999999997	27.529411764705888	198736664048
201364	12.299999999999997	27.176470588235286	198736664048
201365	12.399999999999999	27.176470588235286	198736664048
201366	12.5	27.235294117647058	198736664048
201367	12.600000000000001	27.35294117647059	198736664048
201368	12.700000000000003	27.411764705882355	198736664048
201369	12.799999999999997	27.470588235294123	198736664048
201370	12.899999999999999	27.588235294117645	198736664048
201371	13.0	27.94117647058824	198736664048
201372	13.100000000000001	27.882352941176467	198736664048
201373	13.200000000000003	28.0	198736664048
201374	13.299999999999997	27.94117647058824	198736664048
201375	13.5	27.529411764705888	198736664048
201376	13.600000000000001	27.411764705882355	198736664048
201377	13.700000000000003	27.882352941176467	198736664048
201378	13.899999999999999	28.0	198736664048
201379	14.0	28.176470588235286	198736664048
201380	14.100000000000001	28.235294117647058	198736664048
201381	14.200000000000003	28.0	198736664048
201382	14.200000000000003	28.117647058823533	198736664048
201383	14.299999999999997	28.176470588235286	198736664048
201384	14.5	28.176470588235286	198736664048
201385	14.600000000000001	28.235294117647058	198736664048
201386	14.700000000000003	28.058823529411764	198736664048
201387	14.799999999999997	28.235294117647058	198736664048
201388	14.799999999999997	28.470588235294123	198736664048
201389	14.899999999999999	28.764705882352942	198736664048
201390	15.100000000000001	28.764705882352942	198736664048
201391	15.100000000000001	28.882352941176467	198736664048
201392	15.299999999999997	28.058823529411764	198736664048
201393	15.399999999999999	27.529411764705888	198736664048
201394	15.5	27.764705882352942	198736664048
201395	15.600000000000001	27.882352941176467	198736664048
201396	15.700000000000003	27.94117647058824	198736664048
201397	15.799999999999997	27.529411764705888	198736664048
201398	15.899999999999999	27.70588235294117	198736664048
201399	16.0	27.70588235294117	198736664048
201400	16.1	27.764705882352942	198736664048
201401	16.200000000000003	27.823529411764714	198736664048
201402	16.299999999999997	27.94117647058824	198736664048
201403	16.4	27.764705882352942	198736664048
201404	16.5	27.823529411764714	198736664048
201405	16.6	28.235294117647058	198736664048
201406	16.700000000000003	28.470588235294123	198736664048
201407	16.799999999999997	28.411764705882355	198736664048
201408	17.0	27.94117647058824	198736664048
201409	17.1	28.294117647058826	198736664048
201410	17.200000000000003	28.470588235294123	198736664048
201411	17.4	28.588235294117645	198736664048
201412	17.5	28.705882352941174	198736664048
201413	17.5	28.94117647058824	198736664048
201414	17.700000000000003	29.117647058823533	198736664048
201415	17.799999999999997	28.823529411764714	198736664048
201416	17.9	28.882352941176467	198736664048
201417	18.0	28.94117647058824	198736664048
201418	18.1	28.94117647058824	198736664048
201419	18.200000000000003	28.411764705882355	198736664048
201420	18.200000000000003	28.411764705882355	198736664048
201421	18.299999999999997	28.764705882352942	198736664048
201422	18.4	28.764705882352942	198736664048
201423	18.5	28.823529411764714	198736664048
201424	18.700000000000003	29.0	198736664048
201425	18.799999999999997	29.176470588235297	198736664048
201426	19.0	29.176470588235297	198736664048
201427	19.1	29.235294117647058	198736664048
201428	19.299999999999997	29.235294117647058	198736664048
201429	19.4	29.529411764705888	198736664048
201430	19.5	29.64705882352941	198736664048
201431	19.6	29.64705882352941	198736664048
201432	19.700000000000003	29.64705882352941	198736664048
201433	19.799999999999997	30.0	198736664048
201434	19.9	30.176470588235297	198736664048
201435	20.0	30.117647058823533	198736664048
201436	20.1	30.058823529411764	198736664048
201437	20.200000000000003	30.058823529411764	198736664048
201438	20.299999999999997	30.235294117647058	198736664048
201439	20.4	30.058823529411764	198736664048
201440	20.5	29.058823529411764	198736664048
201441	20.6	29.058823529411764	198736664048
201442	20.700000000000003	28.882352941176467	198736664048
201443	20.799999999999997	28.705882352941174	198736664048
201444	20.9	28.235294117647058	198736664048
201445	21.0	28.235294117647058	198736664048
201446	21.1	28.176470588235286	198736664048
201447	21.200000000000003	28.0	198736664048
201448	21.299999999999997	28.0	198736664048
201449	21.4	27.764705882352942	198736664048
201450	21.5	27.70588235294117	198736664048
201451	21.6	27.70588235294117	198736664048
201452	21.700000000000003	27.64705882352941	198736664048
201453	21.799999999999997	27.588235294117645	198736664048
201454	21.9	26.588235294117645	198736664048
201455	22.0	26.588235294117645	198736664048
201456	22.1	26.588235294117645	198736664048
201457	22.299999999999997	26.705882352941174	198736664048
201458	22.299999999999997	26.764705882352942	198736664048
201459	22.4	26.470588235294123	198736664048
201460	22.5	26.470588235294123	198736664048
201461	22.700000000000003	26.294117647058826	198736664048
201462	22.799999999999997	26.117647058823533	198736664048
201463	22.799999999999997	26.058823529411764	198736664048
201464	23.0	26.176470588235286	198736664048
201465	23.0	26.176470588235286	198736664048
201466	23.1	25.882352941176467	198736664048
201467	23.200000000000003	25.411764705882355	198736664048
201468	23.299999999999997	25.411764705882355	198736664048
201469	23.4	25.411764705882355	198736664048
201470	23.5	25.294117647058826	198736664048
201471	23.6	25.294117647058826	198736664048
201472	23.700000000000003	25.235294117647058	198736664048
201473	23.799999999999997	25.235294117647058	198736664048
201474	23.9	25.294117647058826	198736664048
201475	24.0	25.058823529411764	198736664048
201476	24.1	25.0	198736664048
201477	24.200000000000003	24.882352941176467	198736664048
201478	24.299999999999997	24.882352941176467	198736664048
201479	24.4	24.882352941176467	198736664048
201480	24.5	24.823529411764714	198736664048
201481	24.6	24.823529411764714	198736664048
201482	24.700000000000003	24.764705882352942	198736664048
201483	24.799999999999997	24.764705882352942	198736664048
201484	24.9	24.764705882352942	198736664048
201485	25.0	24.705882352941174	198736664048
201486	25.1	24.764705882352942	198736664048
201487	25.200000000000003	24.411764705882355	198736664048
201488	25.299999999999997	24.411764705882355	198736664048
201489	25.4	24.294117647058826	198736664048
201490	25.5	24.294117647058826	198736664048
201491	25.6	24.176470588235286	198736664048
201492	25.799999999999997	24.235294117647058	198736664048
201493	25.9	24.235294117647058	198736664048
201494	26.0	24.058823529411764	198736664048
201495	26.1	24.176470588235286	198736664048
201496	26.1	24.176470588235286	198736664048
201497	26.200000000000003	24.411764705882355	198736664048
201498	26.299999999999997	24.411764705882355	198736664048
201499	26.299999999999997	24.411764705882355	198736664048
201500	26.4	24.411764705882355	198736664048
201501	26.4	24.529411764705888	198736664048
201502	26.5	24.529411764705888	198736664048
201503	26.6	24.529411764705888	198736664048
201504	26.700000000000003	24.764705882352942	198736664048
201505	26.700000000000003	24.705882352941174	198736664048
201506	26.799999999999997	24.705882352941174	198736664048
201507	26.799999999999997	24.64705882352941	198736664048
201508	26.9	24.588235294117645	198736664048
201509	27.0	24.588235294117645	198736664048
201510	27.0	24.529411764705888	198736664048
201511	27.1	24.705882352941174	198736664048
201512	27.200000000000003	24.470588235294123	198736664048
201513	27.299999999999997	24.470588235294123	198736664048
201514	27.4	24.470588235294123	198736664048
201515	27.5	24.470588235294123	198736664048
201516	27.6	24.529411764705888	198736664048
201517	27.700000000000003	24.470588235294123	198736664048
201518	27.799999999999997	24.470588235294123	198736664048
201519	27.9	24.470588235294123	198736664048
201520	28.0	24.64705882352941	198736664048
201521	28.1	24.764705882352942	198736664048
201522	28.200000000000003	24.705882352941174	198736664048
201523	28.200000000000003	24.705882352941174	198736664048
201524	28.299999999999997	24.705882352941174	198736664048
201525	28.4	24.882352941176467	198736664048
201526	28.5	24.823529411764714	198736664048
201527	28.5	24.764705882352942	198736664048
201528	28.6	24.764705882352942	198736664048
201529	28.6	24.764705882352942	198736664048
201530	28.700000000000003	24.705882352941174	198736664048
201531	28.799999999999997	24.705882352941174	198736664048
201532	28.9	24.64705882352941	198736664048
201533	29.0	24.588235294117645	198736664048
201534	29.1	24.235294117647058	198736664048
201535	29.200000000000003	24.235294117647058	198736664048
201536	29.299999999999997	24.294117647058826	198736664048
201537	29.4	24.294117647058826	198736664048
201538	29.5	24.235294117647058	198736664048
201539	29.6	24.294117647058826	198736664048
201540	29.700000000000003	24.294117647058826	198736664048
201541	29.799999999999997	24.411764705882355	198736664048
201542	29.9	24.470588235294123	198736664048
201543	30.0	24.411764705882355	198736664048
201544	30.1	24.35294117647059	198736664048
201545	30.200000000000003	24.35294117647059	198736664048
201546	30.299999999999997	24.294117647058826	198736664048
201547	30.4	24.294117647058826	198736664048
201548	30.5	24.235294117647058	198736664048
201549	30.6	24.235294117647058	198736664048
201550	30.700000000000003	24.235294117647058	198736664048
201551	30.799999999999997	24.176470588235286	198736664048
201552	30.9	24.411764705882355	198736664048
201553	31.0	24.470588235294123	198736664048
201554	31.1	23.64705882352941	198736664048
201555	31.200000000000003	23.705882352941174	198736664048
201556	31.299999999999997	23.823529411764714	198736664048
201557	31.4	23.882352941176467	198736664048
201558	31.5	23.94117647058824	198736664048
201559	31.6	24.705882352941174	198736664048
201560	31.700000000000003	24.64705882352941	198736664048
201561	31.799999999999997	24.764705882352942	198736664048
201562	31.9	24.823529411764714	198736664048
201563	32.0	24.823529411764714	198736664048
201564	32.1	24.764705882352942	198736664048
201565	32.2	24.882352941176467	198736664048
201566	32.3	24.823529411764714	198736664048
201567	32.4	24.764705882352942	198736664048
201568	32.6	24.705882352941174	198736664048
201569	32.7	24.705882352941174	198736664048
201570	32.8	24.705882352941174	198736664048
201571	32.9	24.64705882352941	198736664048
201572	33.0	24.64705882352941	198736664048
201573	33.099999999999994	24.588235294117645	198736664048
201574	33.2	24.529411764705888	198736664048
201575	33.3	24.529411764705888	198736664048
201576	33.400000000000006	24.588235294117645	198736664048
201577	33.5	24.764705882352942	198736664048
201578	33.599999999999994	24.705882352941174	198736664048
201579	33.7	24.705882352941174	198736664048
201580	33.8	24.764705882352942	198736664048
201581	33.900000000000006	24.764705882352942	198736664048
201582	34.0	24.705882352941174	198736664048
201583	34.099999999999994	24.705882352941174	198736664048
201584	34.2	24.529411764705888	198736664048
201585	34.3	24.529411764705888	198736664048
201586	34.400000000000006	24.470588235294123	198736664048
201587	34.5	24.64705882352941	198736664048
201588	34.599999999999994	24.705882352941174	198736664048
201589	34.7	24.588235294117645	198736664048
201590	34.8	24.411764705882355	198736664048
201591	34.900000000000006	24.470588235294123	198736664048
201592	35.0	24.529411764705888	198736664048
201593	35.099999999999994	24.529411764705888	198736664048
201594	35.2	24.411764705882355	198736664048
201595	35.3	24.294117647058826	198736664048
201596	35.400000000000006	24.529411764705888	198736664048
201597	35.5	24.35294117647059	198736664048
201598	35.599999999999994	24.470588235294123	198736664048
201599	35.7	24.470588235294123	198736664048
201600	35.8	24.470588235294123	198736664048
201601	35.900000000000006	24.529411764705888	198736664048
201602	36.0	24.529411764705888	198736664048
201603	36.099999999999994	24.588235294117645	198736664048
201604	36.2	24.588235294117645	198736664048
201605	36.3	24.705882352941174	198736664048
201606	36.400000000000006	24.764705882352942	198736664048
201607	36.5	24.588235294117645	198736664048
201608	36.599999999999994	24.411764705882355	198736664048
201609	36.7	23.705882352941174	198736664048
201610	36.8	23.64705882352941	198736664048
201611	36.900000000000006	23.64705882352941	198736664048
201612	37.0	23.705882352941174	198736664048
201613	37.099999999999994	23.705882352941174	198736664048
201614	37.2	23.64705882352941	198736664048
201615	37.3	23.588235294117645	198736664048
201616	37.3	23.529411764705888	198736664048
201617	37.400000000000006	23.529411764705888	198736664048
201618	37.5	23.588235294117645	198736664048
201619	37.599999999999994	23.588235294117645	198736664048
201620	37.7	23.64705882352941	198736664048
201621	37.8	23.64705882352941	198736664048
201622	37.900000000000006	23.64705882352941	198736664048
201623	38.0	23.64705882352941	198736664048
201624	38.099999999999994	23.764705882352942	198736664048
201625	38.2	23.882352941176467	198736664048
201626	38.3	23.705882352941174	198736664048
201627	38.400000000000006	23.588235294117645	198736664048
201628	38.5	23.588235294117645	198736664048
201629	38.599999999999994	23.705882352941174	198736664048
201630	38.7	23.823529411764714	198736664048
201631	38.8	23.705882352941174	198736664048
201632	38.900000000000006	23.588235294117645	198736664048
201633	39.0	23.588235294117645	198736664048
201634	39.099999999999994	23.64705882352941	198736664048
201635	39.2	23.64705882352941	198736664048
201636	39.3	23.588235294117645	198736664048
201637	39.400000000000006	23.64705882352941	198736664048
201638	39.5	23.64705882352941	198736664048
201639	39.599999999999994	23.705882352941174	198736664048
201640	39.7	23.64705882352941	198736664048
201641	39.7	23.588235294117645	198736664048
201642	39.8	23.588235294117645	198736664048
201643	39.900000000000006	23.64705882352941	198736664048
201644	40.0	23.588235294117645	198736664048
201645	40.099999999999994	23.588235294117645	198736664048
201646	40.099999999999994	23.588235294117645	198736664048
201647	40.2	23.588235294117645	198736664048
201648	40.2	23.470588235294123	198736664048
201649	40.3	23.470588235294123	198736664048
201650	40.3	23.470588235294123	198736664048
201651	40.400000000000006	23.470588235294123	198736664048
201652	40.5	23.470588235294123	198736664048
201653	40.599999999999994	23.588235294117645	198736664048
201654	40.7	23.588235294117645	198736664048
201655	40.8	23.64705882352941	198736664048
201656	40.900000000000006	23.705882352941174	198736664048
201657	41.0	23.705882352941174	198736664048
201658	41.099999999999994	23.588235294117645	198736664048
201659	41.099999999999994	23.64705882352941	198736664048
201660	41.2	23.64705882352941	198736664048
201661	41.3	23.64705882352941	198736664048
201662	41.400000000000006	23.529411764705888	198736664048
201663	41.5	23.529411764705888	198736664048
201664	41.599999999999994	23.470588235294123	198736664048
201665	41.7	23.470588235294123	198736664048
201666	41.8	23.588235294117645	198736664048
201667	41.8	23.529411764705888	198736664048
201668	41.900000000000006	23.529411764705888	198736664048
201669	42.0	23.529411764705888	198736664048
201670	42.099999999999994	23.470588235294123	198736664048
201671	42.2	23.529411764705888	198736664048
201672	42.400000000000006	23.529411764705888	198736664048
201673	42.5	23.705882352941174	198736664048
201674	42.599999999999994	23.764705882352942	198736664048
201675	42.7	23.764705882352942	198736664048
201676	42.7	23.705882352941174	198736664048
201677	42.8	23.705882352941174	198736664048
201678	42.900000000000006	23.705882352941174	198736664048
201679	42.900000000000006	23.705882352941174	198736664048
201680	43.0	23.705882352941174	198736664048
201681	43.0	23.588235294117645	198736664048
201682	43.099999999999994	23.588235294117645	198736664048
201683	43.099999999999994	23.588235294117645	198736664048
201684	43.2	23.588235294117645	198736664048
201685	43.2	23.588235294117645	198736664048
201686	43.3	23.588235294117645	198736664048
201687	43.3	23.764705882352942	198736664048
201688	43.400000000000006	23.764705882352942	198736664048
201689	43.400000000000006	23.705882352941174	198736664048
201690	43.5	23.705882352941174	198736664048
201691	43.5	23.64705882352941	198736664048
201692	43.599999999999994	23.64705882352941	198736664048
201693	43.599999999999994	23.64705882352941	198736664048
201694	43.7	23.64705882352941	198736664048
201695	43.7	23.64705882352941	198736664048
201696	43.8	23.64705882352941	198736664048
201697	43.900000000000006	23.64705882352941	198736664048
201698	43.900000000000006	23.823529411764714	198736664048
201699	44.0	23.823529411764714	198736664048
201700	44.0	23.823529411764714	198736664048
201701	44.099999999999994	23.823529411764714	198736664048
201702	44.099999999999994	23.823529411764714	198736664048
201703	44.2	23.823529411764714	198736664048
201704	44.2	23.705882352941174	198736664048
201705	44.3	23.705882352941174	198736664048
201706	44.400000000000006	23.764705882352942	198736664048
201707	44.400000000000006	23.764705882352942	198736664048
201708	44.5	23.764705882352942	198736664048
201709	44.5	23.705882352941174	198736664048
201710	44.599999999999994	23.705882352941174	198736664048
201711	44.599999999999994	23.705882352941174	198736664048
201712	44.7	23.588235294117645	198736664048
201713	44.7	23.705882352941174	198736664048
201714	44.8	23.64705882352941	198736664048
201715	44.8	23.64705882352941	198736664048
201716	44.900000000000006	23.823529411764714	198736664048
201717	44.900000000000006	23.823529411764714	198736664048
201718	45.0	23.823529411764714	198736664048
201719	45.099999999999994	23.588235294117645	198736664048
201720	45.3	23.588235294117645	198736664048
201721	45.3	23.764705882352942	198736664048
201722	45.400000000000006	23.705882352941174	198736664048
201723	45.599999999999994	23.764705882352942	198736664048
201724	45.7	23.764705882352942	198736664048
201725	45.8	23.705882352941174	198736664048
201726	46.0	23.64705882352941	198736664048
201727	46.099999999999994	23.64705882352941	198736664048
201728	46.3	23.705882352941174	198736664048
201729	46.400000000000006	23.64705882352941	198736664048
201730	46.5	23.94117647058824	198736664048
201731	46.7	23.705882352941174	198736664048
201732	46.900000000000006	23.705882352941174	198736664048
201733	47.0	23.705882352941174	198736664048
201734	47.2	23.705882352941174	198736664048
201735	47.3	23.64705882352941	198736664048
201736	47.400000000000006	23.588235294117645	198736664048
201737	47.5	23.529411764705888	198736664048
201738	47.599999999999994	23.588235294117645	198736664048
201739	47.7	23.588235294117645	198736664048
201740	47.900000000000006	23.588235294117645	198736664048
201741	48.0	23.588235294117645	198736664048
201742	48.099999999999994	23.764705882352942	198736664048
201743	48.3	23.64705882352941	198736664048
201744	48.400000000000006	23.588235294117645	198736664048
201745	48.5	23.64705882352941	198736664048
201746	48.599999999999994	23.64705882352941	198736664048
201747	48.7	23.64705882352941	198736664048
201748	48.8	23.588235294117645	198736664048
201749	48.900000000000006	23.588235294117645	198736664048
201750	49.0	23.64705882352941	198736664048
201751	49.099999999999994	23.705882352941174	198736664048
201752	49.3	23.764705882352942	198736664048
201753	49.3	23.764705882352942	198736664048
201754	49.400000000000006	23.823529411764714	198736664048
201755	49.7	23.764705882352942	198736664048
201756	49.8	23.764705882352942	198736664048
201757	49.900000000000006	23.764705882352942	198736664048
203053	-29.9	23.64705882352941	198737226976
203054	-29.8	23.64705882352941	198737226976
203055	-29.7	23.64705882352941	198737226976
203056	-29.7	23.64705882352941	198737226976
203057	-29.6	23.64705882352941	198737226976
203058	-29.6	23.64705882352941	198737226976
203059	-29.5	23.64705882352941	198737226976
203060	-29.4	23.705882352941174	198737226976
203061	-29.4	23.705882352941174	198737226976
203062	-29.3	23.705882352941174	198737226976
203063	-29.3	23.705882352941174	198737226976
203064	-29.2	23.705882352941174	198737226976
203065	-29.1	23.705882352941174	198737226976
203066	-29.1	23.705882352941174	198737226976
203067	-29.0	23.705882352941174	198737226976
203068	-29.0	23.705882352941174	198737226976
203069	-28.9	23.764705882352942	198737226976
203070	-28.8	23.764705882352942	198737226976
203071	-28.8	23.764705882352942	198737226976
203072	-28.6	23.764705882352942	198737226976
203073	-28.6	23.764705882352942	198737226976
203074	-28.6	23.764705882352942	198737226976
203075	-28.5	23.64705882352941	198737226976
203076	-28.3	23.588235294117645	198737226976
203077	-28.3	23.588235294117645	198737226976
203078	-28.1	23.64705882352941	198737226976
203079	-28.0	23.64705882352941	198737226976
203080	-28.0	23.588235294117645	198737226976
203081	-27.9	23.588235294117645	198737226976
203082	-27.8	23.588235294117645	198737226976
203083	-27.8	23.588235294117645	198737226976
203084	-27.7	23.705882352941174	198737226976
203085	-27.6	23.705882352941174	198737226976
203086	-27.6	23.705882352941174	198737226976
203087	-27.6	23.764705882352942	198737226976
203088	-27.5	23.764705882352942	198737226976
203089	-27.4	23.764705882352942	198737226976
203090	-27.4	23.764705882352942	198737226976
203091	-27.3	23.764705882352942	198737226976
203092	-27.2	23.764705882352942	198737226976
203093	-27.2	23.64705882352941	198737226976
203094	-27.0	23.64705882352941	198737226976
203095	-26.9	23.64705882352941	198737226976
203096	-26.8	23.588235294117645	198737226976
203097	-26.8	23.588235294117645	198737226976
203098	-26.7	23.588235294117645	198737226976
203099	-26.6	23.588235294117645	198737226976
203100	-26.5	23.64705882352941	198737226976
203101	-26.4	23.64705882352941	198737226976
203102	-26.3	23.764705882352942	198737226976
203103	-26.2	23.764705882352942	198737226976
203104	-26.2	23.823529411764714	198737226976
203105	-26.1	23.823529411764714	198737226976
203106	-26.0	23.823529411764714	198737226976
203107	-25.9	23.764705882352942	198737226976
203108	-25.8	23.764705882352942	198737226976
203109	-25.7	23.764705882352942	198737226976
203110	-25.6	23.882352941176467	198737226976
203111	-25.5	23.882352941176467	198737226976
203112	-25.4	23.764705882352942	198737226976
203113	-25.3	23.764705882352942	198737226976
203114	-25.2	23.764705882352942	198737226976
203115	-25.1	23.764705882352942	198737226976
203116	-25.0	23.764705882352942	198737226976
203117	-24.9	23.764705882352942	198737226976
203118	-24.8	23.823529411764714	198737226976
203119	-24.7	23.823529411764714	198737226976
203120	-24.6	23.705882352941174	198737226976
203121	-24.5	23.705882352941174	198737226976
203122	-24.4	23.705882352941174	198737226976
203123	-24.3	23.588235294117645	198737226976
203124	-24.2	23.588235294117645	198737226976
203125	-24.1	23.529411764705888	198737226976
203126	-24.0	23.529411764705888	198737226976
203127	-23.9	23.411764705882355	198737226976
203128	-23.8	23.411764705882355	198737226976
203129	-23.7	23.470588235294123	198737226976
203130	-23.6	23.411764705882355	198737226976
203131	-23.5	23.411764705882355	198737226976
203132	-23.4	23.529411764705888	198737226976
203133	-23.3	23.529411764705888	198737226976
203134	-23.2	23.588235294117645	198737226976
203135	-23.0	23.588235294117645	198737226976
203136	-23.0	23.588235294117645	198737226976
203137	-22.9	23.588235294117645	198737226976
203138	-22.9	23.588235294117645	198737226976
203139	-22.8	23.588235294117645	198737226976
203140	-22.8	23.588235294117645	198737226976
203141	-22.7	23.588235294117645	198737226976
203142	-22.6	23.588235294117645	198737226976
203143	-22.6	23.64705882352941	198737226976
203144	-22.5	23.64705882352941	198737226976
203145	-22.4	23.64705882352941	198737226976
203146	-22.4	23.64705882352941	198737226976
203147	-22.3	23.64705882352941	198737226976
203148	-22.3	23.64705882352941	198737226976
203149	-22.2	23.64705882352941	198737226976
203150	-22.2	23.64705882352941	198737226976
203151	-22.1	23.64705882352941	198737226976
203152	-22.1	23.64705882352941	198737226976
203153	-22.0	23.64705882352941	198737226976
203154	-21.9	23.64705882352941	198737226976
203155	-21.8	23.705882352941174	198737226976
203156	-21.7	23.823529411764714	198737226976
203157	-21.6	23.705882352941174	198737226976
203158	-21.4	23.64705882352941	198737226976
203159	-21.3	23.64705882352941	198737226976
203160	-21.2	23.588235294117645	198737226976
203161	-21.1	23.588235294117645	198737226976
203162	-21.0	23.588235294117645	198737226976
203163	-20.9	23.588235294117645	198737226976
203164	-20.8	23.705882352941174	198737226976
203165	-20.7	23.705882352941174	198737226976
203166	-20.6	23.588235294117645	198737226976
203167	-20.4	23.588235294117645	198737226976
203168	-20.3	23.64705882352941	198737226976
203169	-20.2	23.588235294117645	198737226976
203170	-20.1	23.529411764705888	198737226976
203171	-20.0	23.705882352941174	198737226976
203172	-19.9	23.705882352941174	198737226976
203173	-19.8	23.705882352941174	198737226976
203174	-19.7	23.823529411764714	198737226976
203175	-19.5	23.823529411764714	198737226976
203176	-19.4	23.823529411764714	198737226976
203177	-19.3	23.764705882352942	198737226976
203178	-19.2	23.823529411764714	198737226976
203179	-19.1	23.823529411764714	198737226976
203180	-19.0	23.882352941176467	198737226976
203181	-18.9	23.882352941176467	198737226976
203182	-18.8	23.764705882352942	198737226976
203183	-18.7	23.705882352941174	198737226976
203184	-18.6	23.882352941176467	198737226976
203185	-18.5	23.823529411764714	198737226976
203186	-18.4	23.823529411764714	198737226976
203187	-18.3	24.0	198737226976
203188	-18.2	24.0	198737226976
203189	-18.1	23.94117647058824	198737226976
203190	-18.0	23.94117647058824	198737226976
203191	-17.9	23.94117647058824	198737226976
203192	-17.8	23.94117647058824	198737226976
203193	-17.7	23.882352941176467	198737226976
203194	-17.6	23.882352941176467	198737226976
203195	-17.5	23.94117647058824	198737226976
203196	-17.4	23.94117647058824	198737226976
203197	-17.3	23.94117647058824	198737226976
203198	-17.2	23.94117647058824	198737226976
203199	-17.1	23.94117647058824	198737226976
203200	-17.0	23.94117647058824	198737226976
203201	-16.9	23.94117647058824	198737226976
203202	-16.8	23.882352941176467	198737226976
203203	-16.7	23.882352941176467	198737226976
203204	-16.6	23.94117647058824	198737226976
203205	-16.5	23.882352941176467	198737226976
203206	-16.4	23.823529411764714	198737226976
203207	-16.3	23.823529411764714	198737226976
203208	-16.2	23.823529411764714	198737226976
203209	-16.1	23.823529411764714	198737226976
203210	-16.0	23.823529411764714	198737226976
203211	-15.9	23.882352941176467	198737226976
203212	-15.8	23.94117647058824	198737226976
203213	-15.7	23.94117647058824	198737226976
203214	-15.6	24.0	198737226976
203215	-15.5	24.0	198737226976
203216	-15.5	24.0	198737226976
203217	-15.4	24.0	198737226976
203218	-15.3	24.117647058823533	198737226976
203219	-15.2	24.117647058823533	198737226976
203220	-15.1	24.058823529411764	198737226976
203221	-15.0	24.0	198737226976
203222	-14.899999999999999	23.94117647058824	198737226976
203223	-14.8	23.94117647058824	198737226976
203224	-14.600000000000001	23.94117647058824	198737226976
203225	-14.5	23.94117647058824	198737226976
203226	-14.399999999999999	24.0	198737226976
203227	-14.3	24.0	198737226976
203228	-14.2	24.0	198737226976
203229	-14.100000000000001	24.058823529411764	198737226976
203230	-14.0	24.176470588235286	198737226976
203231	-13.899999999999999	24.176470588235286	198737226976
203232	-13.8	24.058823529411764	198737226976
203233	-13.7	24.117647058823533	198737226976
203234	-13.600000000000001	24.117647058823533	198737226976
203235	-13.5	24.176470588235286	198737226976
203236	-13.399999999999999	24.176470588235286	198737226976
203237	-13.3	24.0	198737226976
203238	-13.2	23.94117647058824	198737226976
203239	-13.100000000000001	23.94117647058824	198737226976
203240	-13.0	23.94117647058824	198737226976
203241	-12.899999999999999	23.94117647058824	198737226976
203242	-12.8	23.94117647058824	198737226976
203243	-12.7	23.94117647058824	198737226976
203244	-12.600000000000001	23.94117647058824	198737226976
203245	-12.5	23.94117647058824	198737226976
203246	-12.399999999999999	23.94117647058824	198737226976
203247	-12.3	23.882352941176467	198737226976
203248	-12.2	23.823529411764714	198737226976
203249	-12.100000000000001	23.705882352941174	198737226976
203250	-12.0	23.705882352941174	198737226976
203251	-11.899999999999999	23.764705882352942	198737226976
203252	-11.8	23.764705882352942	198737226976
203253	-11.7	23.823529411764714	198737226976
203254	-11.600000000000001	23.823529411764714	198737226976
203255	-11.399999999999999	23.94117647058824	198737226976
203256	-11.3	23.94117647058824	198737226976
203257	-11.100000000000001	23.94117647058824	198737226976
203258	-11.0	23.823529411764714	198737226976
203259	-10.899999999999999	23.94117647058824	198737226976
203260	-10.8	23.94117647058824	198737226976
203261	-10.7	23.94117647058824	198737226976
203262	-10.600000000000001	23.94117647058824	198737226976
203263	-10.5	23.94117647058824	198737226976
203264	-10.399999999999999	23.94117647058824	198737226976
203265	-10.3	23.882352941176467	198737226976
203266	-10.2	23.823529411764714	198737226976
203267	-10.100000000000001	23.764705882352942	198737226976
203268	-10.0	23.764705882352942	198737226976
203269	-9.899999999999999	23.764705882352942	198737226976
203270	-9.8	23.64705882352941	198737226976
203271	-9.7	23.64705882352941	198737226976
203272	-9.600000000000001	23.529411764705888	198737226976
203273	-9.5	23.529411764705888	198737226976
203274	-9.399999999999999	23.588235294117645	198737226976
203275	-9.3	23.588235294117645	198737226976
203276	-9.2	23.64705882352941	198737226976
203277	-9.100000000000001	23.64705882352941	198737226976
203278	-9.0	23.588235294117645	198737226976
203279	-8.899999999999999	23.705882352941174	198737226976
203280	-8.8	23.705882352941174	198737226976
203281	-8.7	23.705882352941174	198737226976
203282	-8.600000000000001	23.823529411764714	198737226976
203283	-8.5	23.764705882352942	198737226976
203284	-8.399999999999999	23.705882352941174	198737226976
203285	-8.3	23.705882352941174	198737226976
203286	-8.100000000000001	23.64705882352941	198737226976
203287	-8.0	23.588235294117645	198737226976
203288	-7.899999999999999	23.588235294117645	198737226976
203289	-7.800000000000001	23.588235294117645	198737226976
203290	-7.699999999999999	23.588235294117645	198737226976
203291	-7.600000000000001	23.64705882352941	198737226976
203292	-7.600000000000001	23.705882352941174	198737226976
203293	-7.5	23.705882352941174	198737226976
203294	-7.399999999999999	23.705882352941174	198737226976
203295	-7.399999999999999	23.705882352941174	198737226976
203296	-7.300000000000001	23.705882352941174	198737226976
203297	-7.300000000000001	23.705882352941174	198737226976
203298	-7.199999999999999	23.705882352941174	198737226976
203299	-7.100000000000001	23.64705882352941	198737226976
203300	-7.0	23.588235294117645	198737226976
203301	-6.899999999999999	23.588235294117645	198737226976
203302	-6.800000000000001	23.588235294117645	198737226976
203303	-6.699999999999999	23.588235294117645	198737226976
203304	-6.600000000000001	23.588235294117645	198737226976
203305	-6.5	23.64705882352941	198737226976
203306	-6.399999999999999	23.64705882352941	198737226976
203307	-6.300000000000001	23.764705882352942	198737226976
203308	-6.199999999999999	23.823529411764714	198737226976
203309	-6.199999999999999	23.823529411764714	198737226976
203310	-6.100000000000001	23.823529411764714	198737226976
203311	-6.0	23.823529411764714	198737226976
203312	-6.0	23.823529411764714	198737226976
203313	-5.899999999999999	23.823529411764714	198737226976
203314	-5.800000000000001	23.882352941176467	198737226976
203315	-5.699999999999999	23.823529411764714	198737226976
203316	-5.699999999999999	23.823529411764714	198737226976
203317	-5.600000000000001	23.823529411764714	198737226976
203318	-5.600000000000001	23.705882352941174	198737226976
203319	-5.5	23.705882352941174	198737226976
203320	-5.5	23.705882352941174	198737226976
203321	-5.399999999999999	23.64705882352941	198737226976
203322	-5.300000000000001	23.64705882352941	198737226976
203323	-5.300000000000001	23.64705882352941	198737226976
203324	-5.199999999999999	23.64705882352941	198737226976
203325	-5.199999999999999	23.705882352941174	198737226976
203326	-5.100000000000001	23.705882352941174	198737226976
203327	-5.100000000000001	23.705882352941174	198737226976
203328	-5.0	23.705882352941174	198737226976
203329	-4.899999999999999	23.705882352941174	198737226976
203330	-4.800000000000001	23.705882352941174	198737226976
203331	-4.699999999999999	23.705882352941174	198737226976
203332	-4.600000000000001	23.705882352941174	198737226976
203333	-4.399999999999999	23.64705882352941	198737226976
203334	-4.399999999999999	23.64705882352941	198737226976
203335	-4.300000000000001	23.705882352941174	198737226976
203336	-4.199999999999999	23.705882352941174	198737226976
203337	-4.100000000000001	23.64705882352941	198737226976
203338	-4.0	23.705882352941174	198737226976
203339	-3.8000000000000007	23.705882352941174	198737226976
203340	-3.8000000000000007	23.764705882352942	198737226976
203341	-3.6999999999999993	23.705882352941174	198737226976
203342	-3.6000000000000014	23.588235294117645	198737226976
203343	-3.5	23.64705882352941	198737226976
203344	-3.3999999999999986	23.705882352941174	198737226976
203345	-3.3000000000000007	23.64705882352941	198737226976
203346	-3.1999999999999993	23.588235294117645	198737226976
203347	-3.0	23.470588235294123	198737226976
203348	-3.0	23.470588235294123	198737226976
203349	-2.8999999999999986	23.529411764705888	198737226976
203350	-2.8000000000000007	23.588235294117645	198737226976
203351	-2.6999999999999993	23.588235294117645	198737226976
203352	-2.6000000000000014	23.588235294117645	198737226976
203353	-2.5	23.588235294117645	198737226976
203354	-2.3999999999999986	23.64705882352941	198737226976
203355	-2.3000000000000007	23.588235294117645	198737226976
203356	-2.1000000000000014	23.64705882352941	198737226976
203357	-2.1000000000000014	23.588235294117645	198737226976
203358	-2.0	23.588235294117645	198737226976
203359	-1.8999999999999986	23.64705882352941	198737226976
203360	-1.8000000000000007	23.64705882352941	198737226976
203361	-1.6999999999999993	23.588235294117645	198737226976
203362	-1.5	23.588235294117645	198737226976
203363	-1.3999999999999986	23.588235294117645	198737226976
203364	-1.3000000000000007	23.588235294117645	198737226976
203365	-1.1999999999999993	23.529411764705888	198737226976
203366	-1.1000000000000014	23.588235294117645	198737226976
203367	-1.0	23.588235294117645	198737226976
203368	-0.8999999999999986	23.705882352941174	198737226976
203369	-0.8000000000000007	23.705882352941174	198737226976
203370	-0.6999999999999993	23.705882352941174	198737226976
203371	-0.6000000000000014	23.35294117647059	198737226976
203372	-0.5	23.35294117647059	198737226976
203373	-0.3999999999999986	23.411764705882355	198737226976
203374	-0.3000000000000007	23.411764705882355	198737226976
203375	-0.1999999999999993	23.35294117647059	198737226976
203376	-0.1999999999999993	23.35294117647059	198737226976
203377	0.0	23.529411764705888	198737226976
203378	0.1999999999999993	23.588235294117645	198737226976
203379	0.3000000000000007	23.588235294117645	198737226976
203380	0.3999999999999986	23.882352941176467	198737226976
203381	0.5	23.882352941176467	198737226976
203382	0.6999999999999993	24.35294117647059	198737226976
203383	0.8000000000000007	24.705882352941174	198737226976
203384	0.8999999999999986	25.117647058823533	198737226976
203385	1.0	25.176470588235286	198737226976
203386	1.1000000000000014	25.470588235294123	198737226976
203387	1.2999999999999972	25.64705882352941	198737226976
203388	1.3999999999999986	25.64705882352941	198737226976
203389	1.3999999999999986	25.94117647058824	198737226976
203390	1.5	25.94117647058824	198737226976
203391	1.6000000000000014	26.0	198737226976
203392	1.7999999999999972	26.058823529411764	198737226976
203393	1.8999999999999986	26.294117647058826	198737226976
203394	1.8999999999999986	26.411764705882355	198737226976
203395	2.0	26.94117647058824	198737226976
203396	2.1000000000000014	27.058823529411764	198737226976
203397	2.299999999999997	27.235294117647058	198737226976
203398	2.3999999999999986	27.294117647058826	198737226976
203399	2.5	27.235294117647058	198737226976
203400	2.6000000000000014	27.235294117647058	198737226976
203401	2.700000000000003	27.411764705882355	198737226976
203402	2.799999999999997	27.235294117647058	198737226976
203403	2.8999999999999986	27.70588235294117	198737226976
203404	3.0	27.823529411764714	198737226976
203405	3.0	27.823529411764714	198737226976
203406	3.1000000000000014	28.0	198737226976
203407	3.200000000000003	28.058823529411764	198737226976
203408	3.299999999999997	28.35294117647059	198737226976
203409	3.3999999999999986	28.529411764705888	198737226976
203410	3.5	28.64705882352941	198737226976
203411	3.5	28.470588235294123	198737226976
203412	3.6000000000000014	28.470588235294123	198737226976
203413	3.700000000000003	28.529411764705888	198737226976
203414	3.700000000000003	28.64705882352941	198737226976
203415	3.799999999999997	28.64705882352941	198737226976
203416	3.8999999999999986	28.588235294117645	198737226976
203417	4.0	28.882352941176467	198737226976
203418	4.100000000000001	29.294117647058826	198737226976
203419	4.200000000000003	29.35294117647059	198737226976
203420	4.299999999999997	29.411764705882355	198737226976
203421	4.399999999999999	28.705882352941174	198737226976
203422	4.5	28.64705882352941	198737226976
203423	4.5	28.823529411764714	198737226976
203424	4.600000000000001	29.176470588235297	198737226976
203425	4.700000000000003	29.176470588235297	198737226976
203426	4.799999999999997	29.117647058823533	198737226976
203427	4.899999999999999	29.0	198737226976
203428	5.0	29.235294117647058	198737226976
203429	5.0	29.235294117647058	198737226976
203430	5.100000000000001	29.117647058823533	198737226976
203431	5.200000000000003	29.235294117647058	198737226976
203432	5.299999999999997	29.411764705882355	198737226976
203433	5.399999999999999	28.764705882352942	198737226976
203434	5.5	29.470588235294123	198737226976
203435	5.600000000000001	29.470588235294123	198737226976
203436	5.700000000000003	29.588235294117645	198737226976
203437	5.799999999999997	29.64705882352941	198737226976
203438	6.0	29.0	198737226976
203439	6.0	28.94117647058824	198737226976
203440	6.100000000000001	29.64705882352941	198737226976
203441	6.200000000000003	29.117647058823533	198737226976
203442	6.399999999999999	29.058823529411764	198737226976
203443	6.399999999999999	29.176470588235297	198737226976
203444	6.5	29.176470588235297	198737226976
203445	6.600000000000001	29.294117647058826	198737226976
203446	6.700000000000003	29.411764705882355	198737226976
203447	6.899999999999999	29.235294117647058	198737226976
203448	6.899999999999999	29.294117647058826	198737226976
203449	7.0	28.64705882352941	198737226976
203450	7.100000000000001	28.764705882352942	198737226976
203451	7.200000000000003	28.058823529411764	198737226976
203452	7.299999999999997	28.235294117647058	198737226976
203453	7.399999999999999	28.294117647058826	198737226976
203454	7.700000000000003	28.0	198737226976
203455	7.799999999999997	28.176470588235286	198737226976
203456	7.899999999999999	27.64705882352941	198737226976
203457	8.0	27.823529411764714	198737226976
203458	8.100000000000001	27.882352941176467	198737226976
203459	8.200000000000003	27.882352941176467	198737226976
203460	8.299999999999997	27.94117647058824	198737226976
203461	8.399999999999999	27.823529411764714	198737226976
203462	8.5	26.882352941176467	198737226976
203463	8.600000000000001	27.0	198737226976
203464	8.700000000000003	27.117647058823533	198737226976
203465	8.799999999999997	27.35294117647059	198737226976
203466	8.899999999999999	27.411764705882355	198737226976
203467	9.0	27.64705882352941	198737226976
203468	9.100000000000001	27.411764705882355	198737226976
203469	9.200000000000003	27.117647058823533	198737226976
203470	9.399999999999999	27.235294117647058	198737226976
203471	9.399999999999999	27.176470588235286	198737226976
203472	9.600000000000001	26.882352941176467	198737226976
203473	9.700000000000003	27.529411764705888	198737226976
203474	9.799999999999997	27.470588235294123	198737226976
203475	10.0	27.470588235294123	198737226976
203476	10.100000000000001	27.70588235294117	198737226976
203477	10.200000000000003	27.70588235294117	198737226976
203478	10.299999999999997	27.0	198737226976
203479	10.399999999999999	27.470588235294123	198737226976
203480	10.5	27.70588235294117	198737226976
203481	10.600000000000001	27.882352941176467	198737226976
203482	10.700000000000003	28.058823529411764	198737226976
203483	10.700000000000003	27.94117647058824	198737226976
203484	10.899999999999999	26.823529411764714	198737226976
203485	10.899999999999999	26.823529411764714	198737226976
203486	11.0	26.882352941176467	198737226976
203487	11.100000000000001	26.94117647058824	198737226976
203488	11.200000000000003	26.94117647058824	198737226976
203489	11.299999999999997	27.235294117647058	198737226976
203490	11.399999999999999	27.235294117647058	198737226976
203491	11.5	26.823529411764714	198737226976
203492	11.600000000000001	26.882352941176467	198737226976
203493	11.700000000000003	26.94117647058824	198737226976
203494	11.799999999999997	27.235294117647058	198737226976
203495	11.899999999999999	27.470588235294123	198737226976
203496	12.0	27.470588235294123	198737226976
203497	12.100000000000001	27.470588235294123	198737226976
203498	12.299999999999997	27.529411764705888	198737226976
203499	12.299999999999997	27.176470588235286	198737226976
203500	12.399999999999999	27.176470588235286	198737226976
203501	12.5	27.235294117647058	198737226976
203502	12.600000000000001	27.35294117647059	198737226976
203503	12.700000000000003	27.411764705882355	198737226976
203504	12.799999999999997	27.470588235294123	198737226976
203505	12.899999999999999	27.588235294117645	198737226976
203506	13.0	27.94117647058824	198737226976
203507	13.100000000000001	27.882352941176467	198737226976
203508	13.200000000000003	28.0	198737226976
203509	13.299999999999997	27.94117647058824	198737226976
203510	13.5	27.529411764705888	198737226976
203511	13.600000000000001	27.411764705882355	198737226976
203512	13.700000000000003	27.882352941176467	198737226976
203513	13.899999999999999	28.0	198737226976
203514	14.0	28.176470588235286	198737226976
203515	14.100000000000001	28.235294117647058	198737226976
203516	14.200000000000003	28.0	198737226976
203517	14.200000000000003	28.117647058823533	198737226976
203518	14.299999999999997	28.176470588235286	198737226976
203519	14.5	28.176470588235286	198737226976
203520	14.600000000000001	28.235294117647058	198737226976
203521	14.700000000000003	28.058823529411764	198737226976
203522	14.799999999999997	28.235294117647058	198737226976
203523	14.799999999999997	28.470588235294123	198737226976
203524	14.899999999999999	28.764705882352942	198737226976
203525	15.100000000000001	28.764705882352942	198737226976
203526	15.100000000000001	28.882352941176467	198737226976
203527	15.299999999999997	28.058823529411764	198737226976
203528	15.399999999999999	27.529411764705888	198737226976
203529	15.5	27.764705882352942	198737226976
203530	15.600000000000001	27.882352941176467	198737226976
203531	15.700000000000003	27.94117647058824	198737226976
203532	15.799999999999997	27.529411764705888	198737226976
203533	15.899999999999999	27.70588235294117	198737226976
203534	16.0	27.70588235294117	198737226976
203535	16.1	27.764705882352942	198737226976
203536	16.200000000000003	27.823529411764714	198737226976
203537	16.299999999999997	27.94117647058824	198737226976
203538	16.4	27.764705882352942	198737226976
203539	16.5	27.823529411764714	198737226976
203540	16.6	28.235294117647058	198737226976
203541	16.700000000000003	28.470588235294123	198737226976
203542	16.799999999999997	28.411764705882355	198737226976
203543	17.0	27.94117647058824	198737226976
203544	17.1	28.294117647058826	198737226976
203545	17.200000000000003	28.470588235294123	198737226976
203546	17.4	28.588235294117645	198737226976
203547	17.5	28.705882352941174	198737226976
203548	17.5	28.94117647058824	198737226976
203549	17.700000000000003	29.117647058823533	198737226976
203550	17.799999999999997	28.823529411764714	198737226976
203551	17.9	28.882352941176467	198737226976
203552	18.0	28.94117647058824	198737226976
203553	18.1	28.94117647058824	198737226976
203554	18.200000000000003	28.411764705882355	198737226976
203555	18.200000000000003	28.411764705882355	198737226976
203556	18.299999999999997	28.764705882352942	198737226976
203557	18.4	28.764705882352942	198737226976
203558	18.5	28.823529411764714	198737226976
203559	18.700000000000003	29.0	198737226976
203560	18.799999999999997	29.176470588235297	198737226976
203561	19.0	29.176470588235297	198737226976
203562	19.1	29.235294117647058	198737226976
203563	19.299999999999997	29.235294117647058	198737226976
203564	19.4	29.529411764705888	198737226976
203565	19.5	29.64705882352941	198737226976
203566	19.6	29.64705882352941	198737226976
203567	19.700000000000003	29.64705882352941	198737226976
203568	19.799999999999997	30.0	198737226976
203569	19.9	30.176470588235297	198737226976
203570	20.0	30.117647058823533	198737226976
203571	20.1	30.058823529411764	198737226976
203572	20.200000000000003	30.058823529411764	198737226976
203573	20.299999999999997	30.235294117647058	198737226976
203574	20.4	30.058823529411764	198737226976
203575	20.5	29.058823529411764	198737226976
203576	20.6	29.058823529411764	198737226976
203577	20.700000000000003	28.882352941176467	198737226976
203578	20.799999999999997	28.705882352941174	198737226976
203579	20.9	28.235294117647058	198737226976
203580	21.0	28.235294117647058	198737226976
203581	21.1	28.176470588235286	198737226976
203582	21.200000000000003	28.0	198737226976
203583	21.299999999999997	28.0	198737226976
203584	21.4	27.764705882352942	198737226976
203585	21.5	27.70588235294117	198737226976
203586	21.6	27.70588235294117	198737226976
203587	21.700000000000003	27.64705882352941	198737226976
203588	21.799999999999997	27.588235294117645	198737226976
203589	21.9	26.588235294117645	198737226976
203590	22.0	26.588235294117645	198737226976
203591	22.1	26.588235294117645	198737226976
203592	22.299999999999997	26.705882352941174	198737226976
203593	22.299999999999997	26.764705882352942	198737226976
203594	22.4	26.470588235294123	198737226976
203595	22.5	26.470588235294123	198737226976
203596	22.700000000000003	26.294117647058826	198737226976
203597	22.799999999999997	26.117647058823533	198737226976
203598	22.799999999999997	26.058823529411764	198737226976
203599	23.0	26.176470588235286	198737226976
203600	23.0	26.176470588235286	198737226976
203601	23.1	25.882352941176467	198737226976
203602	23.200000000000003	25.411764705882355	198737226976
203603	23.299999999999997	25.411764705882355	198737226976
203604	23.4	25.411764705882355	198737226976
203605	23.5	25.294117647058826	198737226976
203606	23.6	25.294117647058826	198737226976
203607	23.700000000000003	25.235294117647058	198737226976
203608	23.799999999999997	25.235294117647058	198737226976
203609	23.9	25.294117647058826	198737226976
203610	24.0	25.058823529411764	198737226976
203611	24.1	25.0	198737226976
203612	24.200000000000003	24.882352941176467	198737226976
203613	24.299999999999997	24.882352941176467	198737226976
203614	24.4	24.882352941176467	198737226976
203615	24.5	24.823529411764714	198737226976
203616	24.6	24.823529411764714	198737226976
203617	24.700000000000003	24.764705882352942	198737226976
203618	24.799999999999997	24.764705882352942	198737226976
203619	24.9	24.764705882352942	198737226976
203620	25.0	24.705882352941174	198737226976
203621	25.1	24.764705882352942	198737226976
203622	25.200000000000003	24.411764705882355	198737226976
203623	25.299999999999997	24.411764705882355	198737226976
203624	25.4	24.294117647058826	198737226976
203625	25.5	24.294117647058826	198737226976
203626	25.6	24.176470588235286	198737226976
203627	25.799999999999997	24.235294117647058	198737226976
203628	25.9	24.235294117647058	198737226976
203629	26.0	24.058823529411764	198737226976
203630	26.1	24.176470588235286	198737226976
203631	26.1	24.176470588235286	198737226976
203632	26.200000000000003	24.411764705882355	198737226976
203633	26.299999999999997	24.411764705882355	198737226976
203634	26.299999999999997	24.411764705882355	198737226976
203635	26.4	24.411764705882355	198737226976
203636	26.4	24.529411764705888	198737226976
203637	26.5	24.529411764705888	198737226976
203638	26.6	24.529411764705888	198737226976
203639	26.700000000000003	24.764705882352942	198737226976
203640	26.700000000000003	24.705882352941174	198737226976
203641	26.799999999999997	24.705882352941174	198737226976
203642	26.799999999999997	24.64705882352941	198737226976
203643	26.9	24.588235294117645	198737226976
203644	27.0	24.588235294117645	198737226976
203645	27.0	24.529411764705888	198737226976
203646	27.1	24.705882352941174	198737226976
203647	27.200000000000003	24.470588235294123	198737226976
203648	27.299999999999997	24.470588235294123	198737226976
203649	27.4	24.470588235294123	198737226976
203650	27.5	24.470588235294123	198737226976
203651	27.6	24.529411764705888	198737226976
203652	27.700000000000003	24.470588235294123	198737226976
203653	27.799999999999997	24.470588235294123	198737226976
203654	27.9	24.470588235294123	198737226976
203655	28.0	24.64705882352941	198737226976
203656	28.1	24.764705882352942	198737226976
203657	28.200000000000003	24.705882352941174	198737226976
203658	28.200000000000003	24.705882352941174	198737226976
203659	28.299999999999997	24.705882352941174	198737226976
203660	28.4	24.882352941176467	198737226976
203661	28.5	24.823529411764714	198737226976
203662	28.5	24.764705882352942	198737226976
203663	28.6	24.764705882352942	198737226976
203664	28.6	24.764705882352942	198737226976
203665	28.700000000000003	24.705882352941174	198737226976
203666	28.799999999999997	24.705882352941174	198737226976
203667	28.9	24.64705882352941	198737226976
203668	29.0	24.588235294117645	198737226976
203669	29.1	24.235294117647058	198737226976
203670	29.200000000000003	24.235294117647058	198737226976
203671	29.299999999999997	24.294117647058826	198737226976
203672	29.4	24.294117647058826	198737226976
203673	29.5	24.235294117647058	198737226976
203674	29.6	24.294117647058826	198737226976
203675	29.700000000000003	24.294117647058826	198737226976
203676	29.799999999999997	24.411764705882355	198737226976
203677	29.9	24.470588235294123	198737226976
203678	30.0	24.411764705882355	198737226976
203679	30.1	24.35294117647059	198737226976
203680	30.200000000000003	24.35294117647059	198737226976
203681	30.299999999999997	24.294117647058826	198737226976
203682	30.4	24.294117647058826	198737226976
203683	30.5	24.235294117647058	198737226976
203684	30.6	24.235294117647058	198737226976
203685	30.700000000000003	24.235294117647058	198737226976
203686	30.799999999999997	24.176470588235286	198737226976
203687	30.9	24.411764705882355	198737226976
203688	31.0	24.470588235294123	198737226976
203689	31.1	23.64705882352941	198737226976
203690	31.200000000000003	23.705882352941174	198737226976
203691	31.299999999999997	23.823529411764714	198737226976
203692	31.4	23.882352941176467	198737226976
203693	31.5	23.94117647058824	198737226976
203694	31.6	24.705882352941174	198737226976
203695	31.700000000000003	24.64705882352941	198737226976
203696	31.799999999999997	24.764705882352942	198737226976
203697	31.9	24.823529411764714	198737226976
203698	32.0	24.823529411764714	198737226976
203699	32.1	24.764705882352942	198737226976
203700	32.2	24.882352941176467	198737226976
203701	32.3	24.823529411764714	198737226976
203702	32.4	24.764705882352942	198737226976
203703	32.6	24.705882352941174	198737226976
203704	32.7	24.705882352941174	198737226976
203705	32.8	24.705882352941174	198737226976
203706	32.9	24.64705882352941	198737226976
203707	33.0	24.64705882352941	198737226976
203708	33.099999999999994	24.588235294117645	198737226976
203709	33.2	24.529411764705888	198737226976
203710	33.3	24.529411764705888	198737226976
203711	33.400000000000006	24.588235294117645	198737226976
203712	33.5	24.764705882352942	198737226976
203713	33.599999999999994	24.705882352941174	198737226976
203714	33.7	24.705882352941174	198737226976
203715	33.8	24.764705882352942	198737226976
203716	33.900000000000006	24.764705882352942	198737226976
203717	34.0	24.705882352941174	198737226976
203718	34.099999999999994	24.705882352941174	198737226976
203719	34.2	24.529411764705888	198737226976
203720	34.3	24.529411764705888	198737226976
203721	34.400000000000006	24.470588235294123	198737226976
203722	34.5	24.64705882352941	198737226976
203723	34.599999999999994	24.705882352941174	198737226976
203724	34.7	24.588235294117645	198737226976
203725	34.8	24.411764705882355	198737226976
203726	34.900000000000006	24.470588235294123	198737226976
203727	35.0	24.529411764705888	198737226976
203728	35.099999999999994	24.529411764705888	198737226976
203729	35.2	24.411764705882355	198737226976
203730	35.3	24.294117647058826	198737226976
203731	35.400000000000006	24.529411764705888	198737226976
203732	35.5	24.35294117647059	198737226976
203733	35.599999999999994	24.470588235294123	198737226976
203734	35.7	24.470588235294123	198737226976
203735	35.8	24.470588235294123	198737226976
203736	35.900000000000006	24.529411764705888	198737226976
203737	36.0	24.529411764705888	198737226976
203738	36.099999999999994	24.588235294117645	198737226976
203739	36.2	24.588235294117645	198737226976
203740	36.3	24.705882352941174	198737226976
203741	36.400000000000006	24.764705882352942	198737226976
203742	36.5	24.588235294117645	198737226976
203743	36.599999999999994	24.411764705882355	198737226976
203744	36.7	23.705882352941174	198737226976
203745	36.8	23.64705882352941	198737226976
203746	36.900000000000006	23.64705882352941	198737226976
203747	37.0	23.705882352941174	198737226976
203748	37.099999999999994	23.705882352941174	198737226976
203749	37.2	23.64705882352941	198737226976
203750	37.3	23.588235294117645	198737226976
203751	37.3	23.529411764705888	198737226976
203752	37.400000000000006	23.529411764705888	198737226976
203753	37.5	23.588235294117645	198737226976
203754	37.599999999999994	23.588235294117645	198737226976
203755	37.7	23.64705882352941	198737226976
203756	37.8	23.64705882352941	198737226976
203757	37.900000000000006	23.64705882352941	198737226976
203758	38.0	23.64705882352941	198737226976
203759	38.099999999999994	23.764705882352942	198737226976
203760	38.2	23.882352941176467	198737226976
203761	38.3	23.705882352941174	198737226976
203762	38.400000000000006	23.588235294117645	198737226976
203763	38.5	23.588235294117645	198737226976
203764	38.599999999999994	23.705882352941174	198737226976
203765	38.7	23.823529411764714	198737226976
203766	38.8	23.705882352941174	198737226976
203767	38.900000000000006	23.588235294117645	198737226976
203768	39.0	23.588235294117645	198737226976
203769	39.099999999999994	23.64705882352941	198737226976
203770	39.2	23.64705882352941	198737226976
203771	39.3	23.588235294117645	198737226976
203772	39.400000000000006	23.64705882352941	198737226976
203773	39.5	23.64705882352941	198737226976
203774	39.599999999999994	23.705882352941174	198737226976
203775	39.7	23.64705882352941	198737226976
203776	39.7	23.588235294117645	198737226976
203777	39.8	23.588235294117645	198737226976
203778	39.900000000000006	23.64705882352941	198737226976
203779	40.0	23.588235294117645	198737226976
203780	40.099999999999994	23.588235294117645	198737226976
203781	40.099999999999994	23.588235294117645	198737226976
203782	40.2	23.588235294117645	198737226976
203783	40.2	23.470588235294123	198737226976
203784	40.3	23.470588235294123	198737226976
203785	40.3	23.470588235294123	198737226976
203786	40.400000000000006	23.470588235294123	198737226976
203787	40.5	23.470588235294123	198737226976
203788	40.599999999999994	23.588235294117645	198737226976
203789	40.7	23.588235294117645	198737226976
203790	40.8	23.64705882352941	198737226976
203791	40.900000000000006	23.705882352941174	198737226976
203792	41.0	23.705882352941174	198737226976
203793	41.099999999999994	23.588235294117645	198737226976
203794	41.099999999999994	23.64705882352941	198737226976
203795	41.2	23.64705882352941	198737226976
203796	41.3	23.64705882352941	198737226976
203797	41.400000000000006	23.529411764705888	198737226976
203798	41.5	23.529411764705888	198737226976
203799	41.599999999999994	23.470588235294123	198737226976
203800	41.7	23.470588235294123	198737226976
203801	41.8	23.588235294117645	198737226976
203802	41.8	23.529411764705888	198737226976
203803	41.900000000000006	23.529411764705888	198737226976
203804	42.0	23.529411764705888	198737226976
203805	42.099999999999994	23.470588235294123	198737226976
203806	42.2	23.529411764705888	198737226976
203807	42.400000000000006	23.529411764705888	198737226976
203808	42.5	23.705882352941174	198737226976
203809	42.599999999999994	23.764705882352942	198737226976
203810	42.7	23.764705882352942	198737226976
203811	42.7	23.705882352941174	198737226976
203812	42.8	23.705882352941174	198737226976
203813	42.900000000000006	23.705882352941174	198737226976
203814	42.900000000000006	23.705882352941174	198737226976
203815	43.0	23.705882352941174	198737226976
203816	43.0	23.588235294117645	198737226976
203817	43.099999999999994	23.588235294117645	198737226976
203818	43.099999999999994	23.588235294117645	198737226976
203819	43.2	23.588235294117645	198737226976
203820	43.2	23.588235294117645	198737226976
203821	43.3	23.588235294117645	198737226976
203822	43.3	23.764705882352942	198737226976
203823	43.400000000000006	23.764705882352942	198737226976
203824	43.400000000000006	23.705882352941174	198737226976
203825	43.5	23.705882352941174	198737226976
203826	43.5	23.64705882352941	198737226976
203827	43.599999999999994	23.64705882352941	198737226976
203828	43.599999999999994	23.64705882352941	198737226976
203829	43.7	23.64705882352941	198737226976
203830	43.7	23.64705882352941	198737226976
203831	43.8	23.64705882352941	198737226976
203832	43.900000000000006	23.64705882352941	198737226976
203833	43.900000000000006	23.823529411764714	198737226976
203834	44.0	23.823529411764714	198737226976
203835	44.0	23.823529411764714	198737226976
203836	44.099999999999994	23.823529411764714	198737226976
203837	44.099999999999994	23.823529411764714	198737226976
203838	44.2	23.823529411764714	198737226976
203839	44.2	23.705882352941174	198737226976
203840	44.3	23.705882352941174	198737226976
203841	44.400000000000006	23.764705882352942	198737226976
203842	44.400000000000006	23.764705882352942	198737226976
203843	44.5	23.764705882352942	198737226976
203844	44.5	23.705882352941174	198737226976
203845	44.599999999999994	23.705882352941174	198737226976
203846	44.599999999999994	23.705882352941174	198737226976
203847	44.7	23.588235294117645	198737226976
203848	44.7	23.705882352941174	198737226976
203849	44.8	23.64705882352941	198737226976
203850	44.8	23.64705882352941	198737226976
203851	44.900000000000006	23.823529411764714	198737226976
203852	44.900000000000006	23.823529411764714	198737226976
203853	45.0	23.823529411764714	198737226976
203854	45.099999999999994	23.588235294117645	198737226976
203855	45.3	23.588235294117645	198737226976
203856	45.3	23.764705882352942	198737226976
203857	45.400000000000006	23.705882352941174	198737226976
203858	45.599999999999994	23.764705882352942	198737226976
203859	45.7	23.764705882352942	198737226976
203860	45.8	23.705882352941174	198737226976
203861	46.0	23.64705882352941	198737226976
203862	46.099999999999994	23.64705882352941	198737226976
203863	46.3	23.705882352941174	198737226976
203864	46.400000000000006	23.64705882352941	198737226976
203865	46.5	23.94117647058824	198737226976
203866	46.7	23.705882352941174	198737226976
203867	46.900000000000006	23.705882352941174	198737226976
203868	47.0	23.705882352941174	198737226976
203869	47.2	23.705882352941174	198737226976
203870	47.3	23.64705882352941	198737226976
203871	47.400000000000006	23.588235294117645	198737226976
203872	47.5	23.529411764705888	198737226976
203873	47.599999999999994	23.588235294117645	198737226976
203874	47.7	23.588235294117645	198737226976
203875	47.900000000000006	23.588235294117645	198737226976
203876	48.0	23.588235294117645	198737226976
203877	48.099999999999994	23.764705882352942	198737226976
203878	48.3	23.64705882352941	198737226976
203879	48.400000000000006	23.588235294117645	198737226976
203880	48.5	23.64705882352941	198737226976
203881	48.599999999999994	23.64705882352941	198737226976
203882	48.7	23.64705882352941	198737226976
203883	48.8	23.588235294117645	198737226976
203884	48.900000000000006	23.588235294117645	198737226976
203885	49.0	23.64705882352941	198737226976
203886	49.099999999999994	23.705882352941174	198737226976
203887	49.3	23.764705882352942	198737226976
203888	49.3	23.764705882352942	198737226976
203889	49.400000000000006	23.823529411764714	198737226976
203890	49.7	23.764705882352942	198737226976
203891	49.8	23.764705882352942	198737226976
203892	49.900000000000006	23.764705882352942	198737226976
205188	-29.9	23.64705882352941	198737789904
205189	-29.8	23.64705882352941	198737789904
205190	-29.7	23.64705882352941	198737789904
205191	-29.7	23.64705882352941	198737789904
205192	-29.6	23.64705882352941	198737789904
205193	-29.6	23.64705882352941	198737789904
205194	-29.5	23.64705882352941	198737789904
205195	-29.4	23.705882352941174	198737789904
205196	-29.4	23.705882352941174	198737789904
205197	-29.3	23.705882352941174	198737789904
205198	-29.3	23.705882352941174	198737789904
205199	-29.2	23.705882352941174	198737789904
205200	-29.1	23.705882352941174	198737789904
205201	-29.1	23.705882352941174	198737789904
205202	-29.0	23.705882352941174	198737789904
205203	-29.0	23.705882352941174	198737789904
205204	-28.9	23.764705882352942	198737789904
205205	-28.8	23.764705882352942	198737789904
205206	-28.8	23.764705882352942	198737789904
205207	-28.6	23.764705882352942	198737789904
205208	-28.6	23.764705882352942	198737789904
205209	-28.6	23.764705882352942	198737789904
205210	-28.5	23.64705882352941	198737789904
205211	-28.3	23.588235294117645	198737789904
205212	-28.3	23.588235294117645	198737789904
205213	-28.1	23.64705882352941	198737789904
205214	-28.0	23.64705882352941	198737789904
205215	-28.0	23.588235294117645	198737789904
205216	-27.9	23.588235294117645	198737789904
205217	-27.8	23.588235294117645	198737789904
205218	-27.8	23.588235294117645	198737789904
205219	-27.7	23.705882352941174	198737789904
205220	-27.6	23.705882352941174	198737789904
205221	-27.6	23.705882352941174	198737789904
205222	-27.6	23.764705882352942	198737789904
205223	-27.5	23.764705882352942	198737789904
205224	-27.4	23.764705882352942	198737789904
205225	-27.4	23.764705882352942	198737789904
205226	-27.3	23.764705882352942	198737789904
205227	-27.2	23.764705882352942	198737789904
205228	-27.2	23.64705882352941	198737789904
205229	-27.0	23.64705882352941	198737789904
205230	-26.9	23.64705882352941	198737789904
205231	-26.8	23.588235294117645	198737789904
205232	-26.8	23.588235294117645	198737789904
205233	-26.7	23.588235294117645	198737789904
205234	-26.6	23.588235294117645	198737789904
205235	-26.5	23.64705882352941	198737789904
205236	-26.4	23.64705882352941	198737789904
205237	-26.3	23.764705882352942	198737789904
205238	-26.2	23.764705882352942	198737789904
205239	-26.2	23.823529411764714	198737789904
205240	-26.1	23.823529411764714	198737789904
205241	-26.0	23.823529411764714	198737789904
205242	-25.9	23.764705882352942	198737789904
205243	-25.8	23.764705882352942	198737789904
205244	-25.7	23.764705882352942	198737789904
205245	-25.6	23.882352941176467	198737789904
205246	-25.5	23.882352941176467	198737789904
205247	-25.4	23.764705882352942	198737789904
205248	-25.3	23.764705882352942	198737789904
205249	-25.2	23.764705882352942	198737789904
205250	-25.1	23.764705882352942	198737789904
205251	-25.0	23.764705882352942	198737789904
205252	-24.9	23.764705882352942	198737789904
205253	-24.8	23.823529411764714	198737789904
205254	-24.7	23.823529411764714	198737789904
205255	-24.6	23.705882352941174	198737789904
205256	-24.5	23.705882352941174	198737789904
205257	-24.4	23.705882352941174	198737789904
205258	-24.3	23.588235294117645	198737789904
205259	-24.2	23.588235294117645	198737789904
205260	-24.1	23.529411764705888	198737789904
205261	-24.0	23.529411764705888	198737789904
205262	-23.9	23.411764705882355	198737789904
205263	-23.8	23.411764705882355	198737789904
205264	-23.7	23.470588235294123	198737789904
205265	-23.6	23.411764705882355	198737789904
205266	-23.5	23.411764705882355	198737789904
205267	-23.4	23.529411764705888	198737789904
205268	-23.3	23.529411764705888	198737789904
205269	-23.2	23.588235294117645	198737789904
205270	-23.0	23.588235294117645	198737789904
205271	-23.0	23.588235294117645	198737789904
205272	-22.9	23.588235294117645	198737789904
205273	-22.9	23.588235294117645	198737789904
205274	-22.8	23.588235294117645	198737789904
205275	-22.8	23.588235294117645	198737789904
205276	-22.7	23.588235294117645	198737789904
205277	-22.6	23.588235294117645	198737789904
205278	-22.6	23.64705882352941	198737789904
205279	-22.5	23.64705882352941	198737789904
205280	-22.4	23.64705882352941	198737789904
205281	-22.4	23.64705882352941	198737789904
205282	-22.3	23.64705882352941	198737789904
205283	-22.3	23.64705882352941	198737789904
205284	-22.2	23.64705882352941	198737789904
205285	-22.2	23.64705882352941	198737789904
205286	-22.1	23.64705882352941	198737789904
205287	-22.1	23.64705882352941	198737789904
205288	-22.0	23.64705882352941	198737789904
205289	-21.9	23.64705882352941	198737789904
205290	-21.8	23.705882352941174	198737789904
205291	-21.7	23.823529411764714	198737789904
205292	-21.6	23.705882352941174	198737789904
205293	-21.4	23.64705882352941	198737789904
205294	-21.3	23.64705882352941	198737789904
205295	-21.2	23.588235294117645	198737789904
205296	-21.1	23.588235294117645	198737789904
205297	-21.0	23.588235294117645	198737789904
205298	-20.9	23.588235294117645	198737789904
205299	-20.8	23.705882352941174	198737789904
205300	-20.7	23.705882352941174	198737789904
205301	-20.6	23.588235294117645	198737789904
205302	-20.4	23.588235294117645	198737789904
205303	-20.3	23.64705882352941	198737789904
205304	-20.2	23.588235294117645	198737789904
205305	-20.1	23.529411764705888	198737789904
205306	-20.0	23.705882352941174	198737789904
205307	-19.9	23.705882352941174	198737789904
205308	-19.8	23.705882352941174	198737789904
205309	-19.7	23.823529411764714	198737789904
205310	-19.5	23.823529411764714	198737789904
205311	-19.4	23.823529411764714	198737789904
205312	-19.3	23.764705882352942	198737789904
205313	-19.2	23.823529411764714	198737789904
205314	-19.1	23.823529411764714	198737789904
205315	-19.0	23.882352941176467	198737789904
205316	-18.9	23.882352941176467	198737789904
205317	-18.8	23.764705882352942	198737789904
205318	-18.7	23.705882352941174	198737789904
205319	-18.6	23.882352941176467	198737789904
205320	-18.5	23.823529411764714	198737789904
205321	-18.4	23.823529411764714	198737789904
205322	-18.3	24.0	198737789904
205323	-18.2	24.0	198737789904
205324	-18.1	23.94117647058824	198737789904
205325	-18.0	23.94117647058824	198737789904
205326	-17.9	23.94117647058824	198737789904
205327	-17.8	23.94117647058824	198737789904
205328	-17.7	23.882352941176467	198737789904
205329	-17.6	23.882352941176467	198737789904
205330	-17.5	23.94117647058824	198737789904
205331	-17.4	23.94117647058824	198737789904
205332	-17.3	23.94117647058824	198737789904
205333	-17.2	23.94117647058824	198737789904
205334	-17.1	23.94117647058824	198737789904
205335	-17.0	23.94117647058824	198737789904
205336	-16.9	23.94117647058824	198737789904
205337	-16.8	23.882352941176467	198737789904
205338	-16.7	23.882352941176467	198737789904
205339	-16.6	23.94117647058824	198737789904
205340	-16.5	23.882352941176467	198737789904
205341	-16.4	23.823529411764714	198737789904
205342	-16.3	23.823529411764714	198737789904
205343	-16.2	23.823529411764714	198737789904
205344	-16.1	23.823529411764714	198737789904
205345	-16.0	23.823529411764714	198737789904
205346	-15.9	23.882352941176467	198737789904
205347	-15.8	23.94117647058824	198737789904
205348	-15.7	23.94117647058824	198737789904
205349	-15.6	24.0	198737789904
205350	-15.5	24.0	198737789904
205351	-15.5	24.0	198737789904
205352	-15.4	24.0	198737789904
205353	-15.3	24.117647058823533	198737789904
205354	-15.2	24.117647058823533	198737789904
205355	-15.1	24.058823529411764	198737789904
205356	-15.0	24.0	198737789904
205357	-14.899999999999999	23.94117647058824	198737789904
205358	-14.8	23.94117647058824	198737789904
205359	-14.600000000000001	23.94117647058824	198737789904
205360	-14.5	23.94117647058824	198737789904
205361	-14.399999999999999	24.0	198737789904
205362	-14.3	24.0	198737789904
205363	-14.2	24.0	198737789904
205364	-14.100000000000001	24.058823529411764	198737789904
205365	-14.0	24.176470588235286	198737789904
205366	-13.899999999999999	24.176470588235286	198737789904
205367	-13.8	24.058823529411764	198737789904
205368	-13.7	24.117647058823533	198737789904
205369	-13.600000000000001	24.117647058823533	198737789904
205370	-13.5	24.176470588235286	198737789904
205371	-13.399999999999999	24.176470588235286	198737789904
205372	-13.3	24.0	198737789904
205373	-13.2	23.94117647058824	198737789904
205374	-13.100000000000001	23.94117647058824	198737789904
205375	-13.0	23.94117647058824	198737789904
205376	-12.899999999999999	23.94117647058824	198737789904
205377	-12.8	23.94117647058824	198737789904
205378	-12.7	23.94117647058824	198737789904
205379	-12.600000000000001	23.94117647058824	198737789904
205380	-12.5	23.94117647058824	198737789904
205381	-12.399999999999999	23.94117647058824	198737789904
205382	-12.3	23.882352941176467	198737789904
205383	-12.2	23.823529411764714	198737789904
205384	-12.100000000000001	23.705882352941174	198737789904
205385	-12.0	23.705882352941174	198737789904
205386	-11.899999999999999	23.764705882352942	198737789904
205387	-11.8	23.764705882352942	198737789904
205388	-11.7	23.823529411764714	198737789904
205389	-11.600000000000001	23.823529411764714	198737789904
205390	-11.399999999999999	23.94117647058824	198737789904
205391	-11.3	23.94117647058824	198737789904
205392	-11.100000000000001	23.94117647058824	198737789904
205393	-11.0	23.823529411764714	198737789904
205394	-10.899999999999999	23.94117647058824	198737789904
205395	-10.8	23.94117647058824	198737789904
205396	-10.7	23.94117647058824	198737789904
205397	-10.600000000000001	23.94117647058824	198737789904
205398	-10.5	23.94117647058824	198737789904
205399	-10.399999999999999	23.94117647058824	198737789904
205400	-10.3	23.882352941176467	198737789904
205401	-10.2	23.823529411764714	198737789904
205402	-10.100000000000001	23.764705882352942	198737789904
205403	-10.0	23.764705882352942	198737789904
205404	-9.899999999999999	23.764705882352942	198737789904
205405	-9.8	23.64705882352941	198737789904
205406	-9.7	23.64705882352941	198737789904
205407	-9.600000000000001	23.529411764705888	198737789904
205408	-9.5	23.529411764705888	198737789904
205409	-9.399999999999999	23.588235294117645	198737789904
205410	-9.3	23.588235294117645	198737789904
205411	-9.2	23.64705882352941	198737789904
205412	-9.100000000000001	23.64705882352941	198737789904
205413	-9.0	23.588235294117645	198737789904
205414	-8.899999999999999	23.705882352941174	198737789904
205415	-8.8	23.705882352941174	198737789904
205416	-8.7	23.705882352941174	198737789904
205417	-8.600000000000001	23.823529411764714	198737789904
205418	-8.5	23.764705882352942	198737789904
205419	-8.399999999999999	23.705882352941174	198737789904
205420	-8.3	23.705882352941174	198737789904
205421	-8.100000000000001	23.64705882352941	198737789904
205422	-8.0	23.588235294117645	198737789904
205423	-7.899999999999999	23.588235294117645	198737789904
205424	-7.800000000000001	23.588235294117645	198737789904
205425	-7.699999999999999	23.588235294117645	198737789904
205426	-7.600000000000001	23.64705882352941	198737789904
205427	-7.600000000000001	23.705882352941174	198737789904
205428	-7.5	23.705882352941174	198737789904
205429	-7.399999999999999	23.705882352941174	198737789904
205430	-7.399999999999999	23.705882352941174	198737789904
205431	-7.300000000000001	23.705882352941174	198737789904
205432	-7.300000000000001	23.705882352941174	198737789904
205433	-7.199999999999999	23.705882352941174	198737789904
205434	-7.100000000000001	23.64705882352941	198737789904
205435	-7.0	23.588235294117645	198737789904
205436	-6.899999999999999	23.588235294117645	198737789904
205437	-6.800000000000001	23.588235294117645	198737789904
205438	-6.699999999999999	23.588235294117645	198737789904
205439	-6.600000000000001	23.588235294117645	198737789904
205440	-6.5	23.64705882352941	198737789904
205441	-6.399999999999999	23.64705882352941	198737789904
205442	-6.300000000000001	23.764705882352942	198737789904
205443	-6.199999999999999	23.823529411764714	198737789904
205444	-6.199999999999999	23.823529411764714	198737789904
205445	-6.100000000000001	23.823529411764714	198737789904
205446	-6.0	23.823529411764714	198737789904
205447	-6.0	23.823529411764714	198737789904
205448	-5.899999999999999	23.823529411764714	198737789904
205449	-5.800000000000001	23.882352941176467	198737789904
205450	-5.699999999999999	23.823529411764714	198737789904
205451	-5.699999999999999	23.823529411764714	198737789904
205452	-5.600000000000001	23.823529411764714	198737789904
205453	-5.600000000000001	23.705882352941174	198737789904
205454	-5.5	23.705882352941174	198737789904
205455	-5.5	23.705882352941174	198737789904
205456	-5.399999999999999	23.64705882352941	198737789904
205457	-5.300000000000001	23.64705882352941	198737789904
205458	-5.300000000000001	23.64705882352941	198737789904
205459	-5.199999999999999	23.64705882352941	198737789904
205460	-5.199999999999999	23.705882352941174	198737789904
205461	-5.100000000000001	23.705882352941174	198737789904
205462	-5.100000000000001	23.705882352941174	198737789904
205463	-5.0	23.705882352941174	198737789904
205464	-4.899999999999999	23.705882352941174	198737789904
205465	-4.800000000000001	23.705882352941174	198737789904
205466	-4.699999999999999	23.705882352941174	198737789904
205467	-4.600000000000001	23.705882352941174	198737789904
205468	-4.399999999999999	23.64705882352941	198737789904
205469	-4.399999999999999	23.64705882352941	198737789904
205470	-4.300000000000001	23.705882352941174	198737789904
205471	-4.199999999999999	23.705882352941174	198737789904
205472	-4.100000000000001	23.64705882352941	198737789904
205473	-4.0	23.705882352941174	198737789904
205474	-3.8000000000000007	23.705882352941174	198737789904
205475	-3.8000000000000007	23.764705882352942	198737789904
205476	-3.6999999999999993	23.705882352941174	198737789904
205477	-3.6000000000000014	23.588235294117645	198737789904
205478	-3.5	23.64705882352941	198737789904
205479	-3.3999999999999986	23.705882352941174	198737789904
205480	-3.3000000000000007	23.64705882352941	198737789904
205481	-3.1999999999999993	23.588235294117645	198737789904
205482	-3.0	23.470588235294123	198737789904
205483	-3.0	23.470588235294123	198737789904
205484	-2.8999999999999986	23.529411764705888	198737789904
205485	-2.8000000000000007	23.588235294117645	198737789904
205486	-2.6999999999999993	23.588235294117645	198737789904
205487	-2.6000000000000014	23.588235294117645	198737789904
205488	-2.5	23.588235294117645	198737789904
205489	-2.3999999999999986	23.64705882352941	198737789904
205490	-2.3000000000000007	23.588235294117645	198737789904
205491	-2.1000000000000014	23.64705882352941	198737789904
205492	-2.1000000000000014	23.588235294117645	198737789904
205493	-2.0	23.588235294117645	198737789904
205494	-1.8999999999999986	23.64705882352941	198737789904
205495	-1.8000000000000007	23.64705882352941	198737789904
205496	-1.6999999999999993	23.588235294117645	198737789904
205497	-1.5	23.588235294117645	198737789904
205498	-1.3999999999999986	23.588235294117645	198737789904
205499	-1.3000000000000007	23.588235294117645	198737789904
205500	-1.1999999999999993	23.529411764705888	198737789904
205501	-1.1000000000000014	23.588235294117645	198737789904
205502	-1.0	23.588235294117645	198737789904
205503	-0.8999999999999986	23.705882352941174	198737789904
205504	-0.8000000000000007	23.705882352941174	198737789904
205505	-0.6999999999999993	23.705882352941174	198737789904
205506	-0.6000000000000014	23.35294117647059	198737789904
[truncated: 10,241 more rows]
