# Supplementary material for: High-throughput automated methods for classical and operant conditioning of Drosophila larvae
Source: eLife. 2022 Oct 28;11:e70015. doi: 10.7554/eLife.70015 (PMC9678368; doi:10.7554/eLife.70015)
Supplement: Figure 4—source data 1. [file elife-70015-fig4-data1.xlsx]

## Sheet: Ddc > CsChr
timeBin	larva	nBendStim	nBendUnstim	bendDiff
1	1	8	5	3
1	2	9	4	5
1	3	1	1	0
1	4	8	6	2
1	5	7	8	-1
1	6	6	1	5
1	7	7	5	2
1	8	4	2	2
1	9	7	6	1
1	10	7	5	2
1	11	5	5	0
1	12	7	7	0
1	13	4	4	0
1	14	3	6	-3
1	15	5	5	0
1	16	0	0	0
1	17	4	5	-1
1	18	3	3	0
1	19	4	8	-4
1	20	5	6	-1
1	21	5	5	0
1	22	2	6	-4
1	23	3	4	-1
1	24	5	6	-1
1	25	3	4	-1
1	26	9	7	2
1	27	5	7	-2
1	28	5	10	-5
1	29	8	5	3
1	30	8	6	2
1	31	6	6	0
1	32	6	3	3
1	33	6	4	2
1	34	5	4	1
1	35	3	3	0
1	36	4	2	2
1	37	8	3	5
1	38	8	3	5
1	39	2	12	-10
1	40	8	7	1
1	41	5	4	1
1	42	6	10	-4
1	43	8	7	1
1	44	7	5	2
1	45	3	2	1
1	46	9	7	2
1	47	3	2	1
1	48	6	7	-1
1	49	9	3	6
1	50	2	3	-1
1	51	5	9	-4
1	52	9	4	5
1	53	4	5	-1
1	54	8	4	4
1	55	5	8	-3
1	56	8	2	6
1	57	3	6	-3
1	58	6	6	0
1	59	7	7	0
1	60	6	5	1
1	61	5	9	-4
1	62	3	3	0
1	63	4	5	-1
1	64	10	12	-2
1	65	5	6	-1
1	66	6	4	2
1	67	10	0	10
1	68	7	5	2
1	69	8	14	-6
1	70	5	9	-4
1	71	10	7	3
1	72	5	4	1
1	73	10	3	7
1	74	2	0	2
1	75	7	5	2
1	76	2	2	0
1	77	4	11	-7
1	78	4	2	2
1	79	6	4	2
1	80	4	4	0
1	81	6	6	0
1	82	4	8	-4
1	83	9	10	-1
1	84	3	4	-1
1	85	7	6	1
1	86	8	5	3
1	87	9	1	8
1	88	4	8	-4
1	89	7	5	2
1	90	2	7	-5
1	91	5	9	-4
1	92	7	8	-1
1	93	7	3	4
1	94	6	10	-4
1	95	8	6	2
1	96	5	4	1
1	97	4	1	3
1	98	0	3	-3
1	99	6	12	-6
1	100	4	10	-6
1	101	4	2	2
1	102	6	11	-5
1	103	9	7	2
1	104	14	5	9
1	105	8	16	-8
1	106	6	5	1
1	107	5	5	0
1	108	10	4	6
1	109	9	5	4
1	110	3	11	-8
1	111	5	6	-1
1	112	4	3	1
1	113	6	7	-1
1	114	3	4	-1
1	115	8	9	-1
1	116	1	3	-2
1	117	3	9	-6
1	118	4	3	1
1	119	8	10	-2
1	120	6	7	-1
1	121	12	5	7
1	122	6	1	5
1	123	3	3	0
1	124	10	6	4
1	125	11	5	6
1	126	9	5	4
1	127	5	7	-2
1	128	6	5	1
1	129	6	6	0
1	130	2	5	-3
1	131	4	12	-8
1	132	4	5	-1
1	133	6	7	-1
1	134	5	4	1
1	135	7	6	1
1	136	1	4	-3
1	137	4	4	0
1	138	3	4	-1
1	139	6	4	2
1	140	2	3	-1
1	141	3	4	-1
1	142	5	4	1
1	143	5	6	-1
1	144	3	5	-2
1	145	6	4	2
1	146	5	5	0
1	147	3	3	0
1	148	4	6	-2
1	149	7	10	-3
1	150	9	2	7
1	151	6	5	1
1	152	6	7	-1
1	153	9	6	3
1	154	6	4	2
1	155	8	4	4
1	156	5	2	3
1	157	1	1	0
1	158	7	6	1
1	159	2	4	-2
1	160	5	3	2
1	161	6	4	2
1	162	0	0	0
1	163	11	5	6
1	164	10	14	-4
1	165	4	7	-3
1	166	9	8	1
1	167	1	0	1
1	168	9	7	2
1	169	6	9	-3
1	170	2	3	-1
1	171	4	10	-6
1	172	10	6	4
1	173	5	6	-1
2	1	8	8	0
2	2	4	11	-7
2	3	6	6	0
2	4	6	2	4
2	5	3	4	-1
2	6	7	5	2
2	7	5	2	3
2	8	3	6	-3
2	9	0	0	0
2	10	5	3	2
2	11	0	3	-3
2	12	3	5	-2
2	13	6	7	-1
2	14	4	8	-4
2	15	5	1	4
2	16	5	6	-1
2	17	6	3	3
2	18	7	4	3
2	19	3	2	1
2	20	6	5	1
2	21	5	6	-1
2	22	5	6	-1
2	23	4	5	-1
2	24	6	4	2
2	25	5	3	2
2	26	6	7	-1
2	27	3	4	-1
2	28	2	3	-1
2	29	5	10	-5
2	30	5	2	3
2	31	7	5	2
2	32	6	4	2
2	33	5	1	4
2	34	4	5	-1
2	35	9	4	5
2	36	4	1	3
2	37	6	5	1
2	38	4	3	1
2	39	5	3	2
2	40	5	2	3
2	41	3	5	-2
2	42	1	0	1
2	43	2	6	-4
2	44	7	1	6
2	45	3	0	3
2	46	4	4	0
2	47	3	6	-3
2	48	2	6	-4
2	49	9	1	8
2	50	8	5	3
2	51	4	4	0
2	52	3	6	-3
2	53	5	8	-3
2	54	5	6	-1
2	55	7	4	3
2	56	6	3	3
2	57	5	5	0
2	58	5	3	2
2	59	4	4	0
2	60	10	3	7
2	61	12	5	7
2	62	3	0	3
2	63	4	1	3
2	64	3	4	-1
2	65	6	6	0
2	66	7	0	7
2	67	8	1	7
2	68	10	7	3
2	69	9	5	4
2	70	7	6	1
2	71	6	8	-2
2	72	7	4	3
2	73	7	6	1
2	74	2	3	-1
2	75	5	8	-3
2	76	6	4	2
2	77	7	2	5
2	78	9	3	6
2	79	10	3	7
2	80	3	4	-1
2	81	4	5	-1
2	82	2	10	-8
2	83	3	6	-3
2	84	4	1	3
2	85	6	3	3
2	86	4	7	-3
2	87	6	3	3
2	88	2	9	-7
2	89	5	4	1
2	90	10	3	7
2	91	2	5	-3
2	92	4	3	1
2	93	7	9	-2
2	94	9	1	8
2	95	10	2	8
2	96	7	9	-2
2	97	10	2	8
2	98	6	9	-3
2	99	8	5	3
2	100	3	4	-1
2	101	5	2	3
2	102	5	6	-1
2	103	4	4	0
2	104	6	4	2
2	105	1	5	-4
2	106	3	7	-4
2	107	3	6	-3
2	108	3	2	1
2	109	3	9	-6
2	110	3	4	-1
2	111	7	5	2
2	112	4	5	-1
2	113	4	6	-2
2	114	8	4	4
2	115	2	11	-9
2	116	7	8	-1
2	117	4	11	-7
2	118	7	4	3
2	119	3	0	3
2	120	5	5	0
2	121	1	9	-8
2	122	4	5	-1
2	123	10	3	7
2	124	5	4	1
2	125	8	7	1
2	126	3	4	-1
2	127	5	5	0
2	128	4	1	3
2	129	6	6	0
2	130	4	4	0
2	131	4	5	-1
2	132	4	4	0
2	133	0	2	-2
2	134	6	5	1
2	135	4	4	0
2	136	6	2	4
2	137	3	2	1
2	138	3	4	-1
2	139	3	2	1
2	140	4	2	2
2	141	5	2	3
2	142	4	6	-2
2	143	4	1	3
2	144	2	6	-4
2	145	8	3	5
2	146	5	6	-1
2	147	4	4	0
2	148	5	4	1
2	149	8	1	7
2	150	8	2	6
2	151	5	2	3
2	152	5	2	3
2	153	3	0	3
2	154	3	9	-6
2	155	2	2	0
2	156	5	4	1
2	157	1	4	-3
2	158	8	0	8
2	159	2	2	0
2	160	6	12	-6
2	161	3	1	2
2	162	4	10	-6
2	163	9	7	2
2	164	3	3	0
2	165	6	6	0
2	166	5	5	0
3	1	9	6	3
3	2	3	3	0
3	3	2	7	-5
3	4	4	4	0
3	5	2	2	0
3	6	4	4	0
3	7	5	3	2
3	8	6	4	2
3	9	4	3	1
3	10	5	6	-1
3	11	0	0	0
3	12	2	3	-1
3	13	5	2	3
3	14	1	4	-3
3	15	3	4	-1
3	16	2	3	-1
3	17	6	3	3
3	18	8	7	1
3	19	5	4	1
3	20	2	3	-1
3	21	4	6	-2
3	22	7	5	2
3	23	7	3	4
3	24	7	5	2
3	25	4	9	-5
3	26	5	8	-3
3	27	8	8	0
3	28	4	7	-3
3	29	7	3	4
3	30	7	2	5
3	31	7	6	1
3	32	6	3	3
3	33	3	1	2
3	34	4	4	0
3	35	4	6	-2
3	36	7	4	3
3	37	4	3	1
3	38	4	3	1
3	39	7	2	5
3	40	5	1	4
3	41	2	3	-1
3	42	4	3	1
3	43	7	0	7
3	44	5	2	3
3	45	7	4	3
3	46	2	1	1
3	47	7	2	5
3	48	7	4	3
3	49	3	4	-1
3	50	2	3	-1
3	51	2	3	-1
3	52	6	3	3
3	53	5	5	0
3	54	6	3	3
3	55	3	4	-1
3	56	5	4	1
3	57	4	3	1
3	58	5	8	-3
3	59	7	7	0
3	60	3	4	-1
3	61	4	6	-2
3	62	7	6	1
3	63	4	1	3
3	64	4	7	-3
3	65	7	4	3
3	66	5	3	2
3	67	5	2	3
3	68	5	2	3
3	69	2	2	0
3	70	5	4	1
3	71	4	6	-2
3	72	8	3	5
3	73	4	3	1
3	74	8	2	6
3	75	3	8	-5
3	76	4	4	0
3	77	5	7	-2
3	78	7	4	3
3	79	5	4	1
3	80	2	2	0
3	81	4	6	-2
3	82	3	4	-1
3	83	4	4	0
3	84	7	8	-1
3	85	6	5	1
3	86	10	4	6
3	87	5	11	-6
3	88	3	3	0
3	89	7	5	2
3	90	8	2	6
3	91	2	1	1
3	92	4	4	0
3	93	24	0	24
3	94	5	8	-3
3	95	2	5	-3
3	96	10	3	7
3	97	6	6	0
3	98	8	1	7
3	99	5	5	0
3	100	5	0	5
3	101	5	3	2
3	102	6	8	-2
3	103	4	2	2
3	104	14	6	8
3	105	3	5	-2
3	106	4	9	-5
3	107	3	4	-1
3	108	6	1	5
3	109	2	7	-5
3	110	6	7	-1
3	111	1	2	-1
3	112	7	7	0
3	113	7	4	3
3	114	6	8	-2
3	115	8	2	6
3	116	2	7	-5
3	117	4	6	-2
3	118	5	7	-2
3	119	6	4	2
3	120	3	6	-3
3	121	5	5	0
3	122	7	3	4
3	123	4	6	-2
3	124	4	5	-1
3	125	0	3	-3
3	126	3	6	-3
3	127	3	7	-4
3	128	6	4	2
3	129	11	4	7
3	130	3	2	1
3	131	3	5	-2
3	132	5	2	3
3	133	4	1	3
3	134	4	3	1
3	135	5	4	1
3	136	1	4	-3
3	137	5	3	2
3	138	4	3	1
3	139	2	4	-2
3	140	6	3	3
3	141	6	3	3
3	142	1	4	-3
3	143	5	6	-1
3	144	5	2	3
3	145	4	2	2
3	146	8	3	5
3	147	4	5	-1
3	148	4	2	2
3	149	9	5	4
3	150	7	5	2
3	151	4	3	1
3	152	4	3	1
3	153	1	3	-2
3	154	9	2	7
3	155	6	2	4
3	156	3	3	0
3	157	4	0	4
3	158	4	5	-1
3	159	2	5	-3
3	160	4	7	-3
3	161	4	4	0
3	162	8	4	4
4	1	2	4	-2
4	2	8	3	5
4	3	7	3	4
4	4	5	3	2
4	5	3	3	0
4	6	2	3	-1
4	7	5	3	2
4	8	7	4	3
4	9	8	3	5
4	10	6	5	1
4	11	8	3	5
4	12	0	0	0
4	13	4	6	-2
4	14	4	3	1
4	15	8	4	4
4	16	4	8	-4
4	17	6	7	-1
4	18	5	6	-1
4	19	8	6	2
4	20	5	4	1
4	21	7	6	1
4	22	3	2	1
4	23	8	6	2
4	24	7	3	4
4	25	7	8	-1
4	26	5	2	3
4	27	5	12	-7
4	28	4	5	-1
4	29	6	7	-1
4	30	9	1	8
4	31	7	3	4
4	32	4	0	4
4	33	10	3	7
4	34	9	4	5
4	35	4	3	1
4	36	3	1	2
4	37	4	6	-2
4	38	9	4	5
4	39	4	4	0
4	40	5	3	2
4	41	6	7	-1
4	42	3	1	2
4	43	4	7	-3
4	44	6	4	2
4	45	7	6	1
4	46	8	2	6
4	47	1	1	0
4	48	5	2	3
4	49	6	5	1
4	50	6	4	2
4	51	3	2	1
4	52	6	4	2
4	53	6	4	2
4	54	3	5	-2
4	55	9	0	9
4	56	3	0	3
4	57	1	3	-2
4	58	7	2	5
4	59	5	3	2
4	60	2	9	-7
4	61	4	2	2
4	62	8	4	4
4	63	3	2	1
4	64	4	8	-4
4	65	6	2	4
4	66	6	2	4
4	67	11	5	6
4	68	4	8	-4
4	69	6	6	0
4	70	9	5	4
4	71	6	2	4
4	72	7	10	-3
4	73	9	5	4
4	74	6	3	3
4	75	4	1	3
4	76	8	4	4
4	77	10	5	5
4	78	8	8	0
4	79	4	0	4
4	80	20	0	20
4	81	1	5	-4
4	82	4	6	-2
4	83	8	4	4
4	84	5	7	-2
4	85	3	11	-8
4	86	2	5	-3
4	87	9	3	6
4	88	4	1	3
4	89	7	3	4
4	90	4	8	-4
4	91	4	5	-1
4	92	9	2	7
4	93	4	12	-8
4	94	3	5	-2
4	95	7	6	1
4	96	4	7	-3
4	97	8	4	4
4	98	2	5	-3
4	99	5	5	0
4	100	3	6	-3
4	101	2	10	-8
4	102	5	5	0
4	103	3	1	2
4	104	1	4	-3
4	105	10	4	6
4	106	3	5	-2
4	107	8	4	4
4	108	8	2	6
4	109	1	6	-5
4	110	3	3	0
4	111	7	7	0
4	112	3	2	1
4	113	6	3	3
4	114	7	2	5
4	115	2	4	-2
4	116	6	4	2
4	117	7	3	4
4	118	6	4	2
4	119	7	1	6
4	120	9	2	7
4	121	2	4	-2
4	122	4	5	-1
4	123	3	4	-1
4	124	10	0	10
4	125	2	7	-5
4	126	9	2	7
4	127	5	9	-4
4	128	5	1	4
4	129	10	1	9
4	130	5	5	0
4	131	2	2	0
4	132	8	1	7
4	133	2	6	-4
4	134	5	4	1
4	135	5	4	1
4	136	5	2	3
4	137	2	5	-3
4	138	6	8	-2
4	139	5	1	4
4	140	8	3	5
4	141	4	4	0
4	142	1	3	-2
4	143	5	7	-2
4	144	8	5	3
5	1	1	3	-2
5	2	7	1	6
5	3	6	4	2
5	4	4	7	-3
5	5	3	0	3
5	6	4	4	0
5	7	7	7	0
5	8	0	0	0
5	9	3	5	-2
5	10	2	5	-3
5	11	8	7	1
5	12	4	4	0
5	13	6	6	0
5	14	4	6	-2
5	15	3	8	-5
5	16	6	4	2
5	17	6	7	-1
5	18	5	7	-2
5	19	6	6	0
5	20	8	8	0
5	21	3	6	-3
5	22	6	3	3
5	23	4	8	-4
5	24	0	1	-1
5	25	8	7	1
5	26	5	3	2
5	27	4	10	-6
5	28	4	5	-1
5	29	5	7	-2
5	30	10	7	3
5	31	3	4	-1
5	32	5	6	-1
5	33	4	4	0
5	34	7	3	4
5	35	4	5	-1
5	36	1	4	-3
5	37	7	6	1
5	38	6	2	4
5	39	4	3	1
5	40	3	7	-4
5	41	7	5	2
5	42	4	3	1
5	43	5	5	0
5	44	3	6	-3
5	45	5	7	-2
5	46	3	2	1
5	47	5	1	4
5	48	6	4	2
5	49	5	9	-4
5	50	8	6	2
5	51	8	5	3
5	52	3	6	-3
5	53	3	2	1
5	54	3	9	-6
5	55	6	4	2
5	56	2	2	0
5	57	4	5	-1
5	58	7	5	2
5	59	7	6	1
5	60	4	2	2
5	61	6	3	3
5	62	5	4	1
5	63	10	7	3
5	64	4	2	2
5	65	4	2	2
5	66	5	2	3
5	67	9	4	5
5	68	2	4	-2
5	69	10	9	1
5	70	3	3	0
5	71	8	10	-2
5	72	3	8	-5
5	73	10	4	6
5	74	5	9	-4
5	75	3	4	-1
5	76	5	9	-4
5	77	9	8	1
5	78	8	0	8
5	79	1	8	-7
5	80	4	10	-6
5	81	7	3	4
5	82	5	6	-1
5	83	5	2	3
5	84	4	6	-2
5	85	6	6	0
5	86	4	6	-2
5	87	4	4	0
5	88	8	6	2
5	89	5	4	1
5	90	5	9	-4
5	91	5	3	2
5	92	8	8	0
5	93	2	6	-4
5	94	5	10	-5
5	95	5	5	0
5	96	5	8	-3
5	97	3	5	-2
5	98	7	6	1
5	99	4	4	0
5	100	6	3	3
5	101	3	5	-2
5	102	4	6	-2
5	103	5	4	1
5	104	6	4	2
5	105	5	5	0
5	106	7	4	3
5	107	5	6	-1
5	108	6	6	0
5	109	4	5	-1
5	110	10	5	5
5	111	7	4	3
5	112	4	3	1
5	113	4	5	-1
5	114	4	5	-1
5	115	6	3	3
5	116	2	3	-1
5	117	10	2	8
5	118	4	4	0
5	119	4	5	-1
5	120	4	2	2
5	121	8	5	3
5	122	3	2	1
5	123	7	7	0
5	124	4	4	0
5	125	10	6	4
5	126	3	5	-2
5	127	8	7	1
5	128	7	5	2
5	129	6	5	1
5	130	5	6	-1
5	131	7	4	3
5	132	11	7	4
5	133	5	4	1
5	134	4	7	-3
5	135	2	1	1
5	136	7	4	3
6	1	6	5	1
6	2	8	5	3
6	3	8	3	5
6	4	4	8	-4
6	5	1	2	-1
6	6	6	3	3
6	7	4	6	-2
6	8	6	5	1
6	9	8	8	0
6	10	5	3	2
6	11	7	6	1
6	12	8	5	3
6	13	8	8	0
6	14	0	0	0
6	15	4	5	-1
6	16	6	4	2
6	17	3	3	0
6	18	4	1	3
6	19	3	5	-2
6	20	1	2	-1
6	21	1	2	-1
6	22	8	6	2
6	23	5	8	-3
6	24	4	3	1
6	25	7	6	1
6	26	1	0	1
6	27	8	4	4
6	28	1	3	-2
6	29	2	4	-2
6	30	4	6	-2
6	31	0	1	-1
6	32	1	2	-1
6	33	5	3	2
6	34	7	3	4
6	35	2	11	-9
6	36	1	3	-2
6	37	8	4	4
6	38	3	5	-2
6	39	3	2	1
6	40	4	3	1
6	41	3	5	-2
6	42	5	5	0
6	43	6	8	-2
6	44	5	6	-1
6	45	4	4	0
6	46	4	8	-4
6	47	5	6	-1
6	48	9	2	7
6	49	9	6	3
6	50	6	8	-2
6	51	4	3	1
6	52	6	5	1
6	53	6	1	5
6	54	4	7	-3
6	55	2	6	-4
6	56	3	2	1
6	57	9	7	2
6	58	4	1	3
6	59	6	11	-5
6	60	4	6	-2
6	61	4	4	0
6	62	4	7	-3
6	63	3	1	2
6	64	3	6	-3
6	65	4	2	2
6	66	6	6	0
6	67	6	5	1
6	68	5	4	1
6	69	11	3	8
6	70	5	5	0
6	71	5	4	1
6	72	7	2	5
6	73	5	3	2
6	74	6	5	1
6	75	6	7	-1
6	76	6	3	3
6	77	3	2	1
6	78	2	3	-1
6	79	4	3	1
6	80	3	1	2
6	81	5	3	2
6	82	6	2	4
6	83	2	3	-1
6	84	14	0	14
6	85	4	2	2
6	86	6	7	-1
6	87	8	4	4
6	88	7	1	6
6	89	2	9	-7
6	90	12	7	5
6	91	4	3	1
6	92	4	3	1
6	93	3	3	0
6	94	3	3	0
6	95	5	5	0
6	96	4	0	4
6	97	4	4	0
6	98	4	5	-1
6	99	3	5	-2
6	100	1	6	-5
6	101	6	2	4
6	102	1	6	-5
6	103	4	9	-5
6	104	4	5	-1
6	105	5	9	-4
6	106	6	8	-2
6	107	10	0	10
6	108	9	4	5
6	109	8	5	3
6	110	5	4	1
6	111	4	5	-1
6	112	4	5	-1
6	113	6	3	3
6	114	2	5	-3
6	115	4	3	1
6	116	6	4	2
6	117	3	2	1
6	118	3	4	-1
6	119	2	2	0
6	120	4	4	0
6	121	5	6	-1
6	122	5	1	4
6	123	5	1	4
6	124	5	4	1
6	125	1	3	-2
6	126	5	1	4
6	127	3	1	2
6	128	4	6	-2
6	129	5	2	3
6	130	4	2	2
6	131	6	5	1
6	132	4	4	0
6	133	7	4	3
6	134	4	3	1
6	135	5	4	1
6	136	3	2	1
6	137	1	6	-5
6	138	2	2	0
6	139	6	2	4
6	140	0	0	0
6	141	6	4	2
6	142	0	4	-4
6	143	2	2	0
6	144	2	2	0
6	145	1	4	-3
6	146	3	5	-2
6	147	5	6	-1
6	148	8	3	5
6	149	10	3	7
6	150	1	1	0
6	151	2	1	1
6	152	7	7	0
6	153	8	0	8
6	154	8	6	2
6	155	2	5	-3
6	156	8	3	5
6	157	1	4	-3
6	158	3	3	0
7	1	2	3	-1
7	2	6	1	5
7	3	5	5	0
7	4	10	2	8
7	5	6	7	-1
7	6	4	3	1
7	7	5	6	-1
7	8	1	5	-4
7	9	6	4	2
7	10	0	0	0
7	11	5	1	4
7	12	3	6	-3
7	13	2	2	0
7	14	6	8	-2
7	15	4	3	1
7	16	4	2	2
7	17	7	7	0
7	18	0	3	-3
7	19	8	9	-1
7	20	6	2	4
7	21	10	4	6
7	22	2	3	-1
7	23	7	2	5
7	24	2	1	1
7	25	7	2	5
7	26	3	1	2
7	27	5	1	4
7	28	0	10	-10
7	29	5	8	-3
7	30	6	2	4
7	31	10	6	4
7	32	5	4	1
7	33	2	1	1
7	34	3	4	-1
7	35	5	5	0
7	36	9	2	7
7	37	7	3	4
7	38	3	5	-2
7	39	3	7	-4
7	40	4	3	1
7	41	5	3	2
7	42	9	3	6
7	43	6	3	3
7	44	7	2	5
7	45	7	3	4
7	46	4	7	-3
7	47	2	3	-1
7	48	3	3	0
7	49	4	2	2
7	50	2	7	-5
7	51	5	2	3
7	52	4	0	4
7	53	5	4	1
7	54	8	5	3
7	55	6	7	-1
7	56	2	0	2
7	57	9	1	8
7	58	2	2	0
7	59	5	5	0
7	60	7	7	0
7	61	6	4	2
7	62	7	6	1
7	63	4	5	-1
7	64	6	8	-2
7	65	2	4	-2
7	66	5	2	3
7	67	5	5	0
7	68	5	4	1
7	69	9	3	6
7	70	4	3	1
7	71	6	3	3
7	72	4	3	1
7	73	4	5	-1
7	74	6	1	5
7	75	4	7	-3
7	76	3	5	-2
7	77	5	5	0
7	78	5	4	1
7	79	5	5	0
7	80	4	4	0
7	81	2	3	-1
7	82	3	2	1
7	83	6	0	6
7	84	1	0	1
7	85	4	7	-3
7	86	8	4	4
7	87	9	3	6
7	88	4	5	-1
7	89	2	5	-3
7	90	4	3	1
7	91	6	4	2
7	92	5	5	0
7	93	8	2	6
7	94	6	6	0
7	95	2	1	1
7	96	5	2	3
7	97	8	5	3
7	98	5	5	0
7	99	12	4	8
7	100	3	7	-4
7	101	2	5	-3
7	102	5	4	1
7	103	3	3	0
7	104	10	4	6
7	105	0	4	-4
7	106	5	2	3
7	107	4	5	-1
7	108	3	5	-2
7	109	3	4	-1
7	110	3	8	-5
7	111	9	2	7
7	112	11	7	4
7	113	4	4	0
7	114	7	2	5
7	115	5	4	1
7	116	1	6	-5
7	117	5	5	0
7	118	2	3	-1
7	119	0	3	-3
7	120	1	1	0
7	121	2	4	-2
7	122	8	4	4
7	123	6	3	3
7	124	2	5	-3
7	125	6	5	1
7	126	6	4	2
7	127	2	2	0
7	128	5	2	3
7	129	3	4	-1
7	130	8	5	3
7	131	6	3	3
7	132	4	1	3
7	133	7	4	3
7	134	4	6	-2
7	135	7	6	1
7	136	1	6	-5
7	137	3	3	0
7	138	6	3	3
7	139	4	4	0
7	140	1	1	0
7	141	6	7	-1
7	142	3	1	2
7	143	0	3	-3
7	144	5	2	3
7	145	2	8	-6
7	146	1	4	-3
7	147	6	4	2
7	148	7	4	3
7	149	6	5	1
7	150	1	4	-3
7	151	5	2	3
7	152	4	2	2
7	153	9	7	2
7	154	6	6	0
7	155	3	4	-1
7	156	6	1	5
7	157	5	5	0
7	158	7	3	4
7	159	3	1	2
7	160	1	1	0
7	161	4	5	-1
7	162	4	4	0
7	163	5	5	0
7	164	7	7	0
8	1	5	8	-3
8	2	11	0	11
8	3	4	4	0
8	4	6	5	1
8	5	5	7	-2
8	6	7	3	4
8	7	4	3	1
8	8	4	5	-1
8	9	2	5	-3
8	10	4	7	-3
8	11	0	0	0
8	12	1	6	-5
8	13	4	5	-1
8	14	1	2	-1
8	15	6	3	3
8	16	1	1	0
8	17	5	4	1
8	18	7	2	5
8	19	7	2	5
8	20	10	0	10
8	21	0	0	0
8	22	2	1	1
8	23	3	2	1
8	24	8	1	7
8	25	6	4	2
8	26	6	4	2
8	27	5	5	0
8	28	6	4	2
8	29	4	1	3
8	30	7	8	-1
8	31	5	2	3
8	32	2	2	0
8	33	4	6	-2
8	34	4	2	2
8	35	8	2	6
8	36	5	2	3
8	37	7	6	1
8	38	6	4	2
8	39	11	8	3
8	40	5	4	1
8	41	7	4	3
8	42	1	2	-1
8	43	9	0	9
8	44	3	4	-1
8	45	5	6	-1
8	46	5	5	0
8	47	4	1	3
8	48	5	4	1
8	49	4	1	3
8	50	9	2	7
8	51	7	5	2
8	52	4	7	-3
8	53	2	6	-4
8	54	5	5	0
8	55	6	2	4
8	56	8	7	1
8	57	2	3	-1
8	58	5	7	-2
8	59	4	2	2
8	60	4	3	1
8	61	3	4	-1
8	62	2	9	-7
8	63	2	5	-3
8	64	4	5	-1
8	65	8	5	3
8	66	5	4	1
8	67	2	2	0
8	68	6	2	4
8	69	4	4	0
8	70	2	2	0
8	71	3	6	-3
8	72	5	1	4
8	73	3	5	-2
8	74	5	6	-1
8	75	5	6	-1
8	76	6	6	0
8	77	3	1	2
8	78	6	3	3
8	79	6	6	0
8	80	5	1	4
8	81	11	0	11
8	82	10	7	3
8	83	5	6	-1
8	84	5	4	1
8	85	7	3	4
8	86	5	5	0
8	87	0	4	-4
8	88	5	6	-1
8	89	6	3	3
8	90	2	0	2
8	91	4	3	1
8	92	7	0	7
8	93	6	7	-1
8	94	4	1	3
8	95	5	8	-3
8	96	11	4	7
8	97	6	7	-1
8	98	6	7	-1
8	99	7	5	2
8	100	7	4	3
8	101	21	2	19
8	102	10	8	2
8	103	2	3	-1
8	104	4	3	1
8	105	5	7	-2
8	106	6	9	-3
8	107	3	6	-3
8	108	5	5	0
8	109	11	2	9
8	110	7	3	4
8	111	2	6	-4
8	112	4	2	2
8	113	2	4	-2
8	114	4	6	-2
8	115	5	5	0
8	116	5	3	2
8	117	4	4	0
8	118	5	7	-2
8	119	9	1	8
8	120	3	3	0
8	121	7	2	5
8	122	6	4	2
8	123	6	2	4
8	124	2	1	1
8	125	3	1	2
8	126	7	5	2
8	127	3	2	1
8	128	6	2	4
8	129	3	4	-1
8	130	7	2	5
8	131	5	1	4
8	132	4	6	-2
8	133	7	4	3
8	134	5	3	2
8	135	5	2	3
8	136	6	3	3
8	137	5	4	1
8	138	5	4	1
8	139	9	2	7
8	140	4	0	4
8	141	2	2	0
8	142	2	0	2
8	143	6	3	3
8	144	4	4	0
8	145	4	1	3
8	146	3	2	1
8	147	1	0	1
8	148	3	3	0
8	149	9	3	6
8	150	2	5	-3
8	151	8	4	4
8	152	4	8	-4
8	153	6	9	-3
9	1	4	2	2
9	2	6	3	3
9	3	8	3	5
9	4	7	7	0
9	5	2	4	-2
9	6	2	2	0
9	7	3	1	2
9	8	4	3	1
9	9	2	3	-1
9	10	5	4	1
9	11	4	4	0
9	12	9	3	6
9	13	1	5	-4
9	14	4	5	-1
9	15	1	1	0
9	16	7	4	3
9	17	4	2	2
9	18	7	2	5
9	19	10	9	1
9	20	6	4	2
9	21	5	5	0
9	22	1	1	0
9	23	6	3	3
9	24	4	7	-3
9	25	4	6	-2
9	26	2	2	0
9	27	8	3	5
9	28	2	10	-8
9	29	4	6	-2
9	30	3	3	0
9	31	6	8	-2
9	32	3	5	-2
9	33	2	1	1
9	34	11	7	4
9	35	7	3	4
9	36	2	1	1
9	37	1	1	0
9	38	4	4	0
9	39	5	2	3
9	40	7	5	2
9	41	4	7	-3
9	42	3	6	-3
9	43	6	3	3
9	44	3	2	1
9	45	8	1	7
9	46	4	8	-4
9	47	2	6	-4
9	48	6	6	0
9	49	8	1	7
9	50	5	5	0
9	51	3	3	0
9	52	6	4	2
9	53	7	10	-3
9	54	3	2	1
9	55	2	2	0
9	56	5	7	-2
9	57	5	3	2
9	58	5	13	-8
9	59	4	4	0
9	60	2	5	-3
9	61	6	6	0
9	62	7	5	2
9	63	4	3	1
9	64	8	5	3
9	65	3	2	1
9	66	4	7	-3
9	67	3	6	-3
9	68	7	2	5
9	69	6	7	-1
9	70	5	4	1
9	71	4	9	-5
9	72	7	5	2
9	73	8	6	2
9	74	4	3	1
9	75	6	3	3
9	76	2	5	-3
9	77	7	3	4
9	78	5	7	-2
9	79	7	8	-1
9	80	6	4	2
9	81	4	6	-2
9	82	5	7	-2
9	83	3	2	1
9	84	2	4	-2
9	85	5	7	-2
9	86	4	3	1
9	87	5	9	-4
9	88	4	3	1
9	89	3	0	3
9	90	8	8	0
9	91	10	7	3
9	92	9	2	7
9	93	2	5	-3
9	94	2	9	-7
9	95	2	3	-1
9	96	8	6	2
9	97	6	8	-2
9	98	1	3	-2
9	99	7	7	0
9	100	3	6	-3
9	101	5	2	3
9	102	7	6	1
9	103	1	3	-2
9	104	7	9	-2
9	105	4	3	1
9	106	5	6	-1
9	107	3	6	-3
9	108	5	4	1
9	109	3	5	-2
9	110	3	4	-1
9	111	5	3	2
9	112	5	2	3
9	113	4	4	0
9	114	6	3	3
9	115	2	4	-2
9	116	7	2	5
9	117	7	4	3
9	118	3	5	-2
9	119	2	5	-3
9	120	4	5	-1
9	121	8	5	3
9	122	3	3	0
9	123	4	2	2
9	124	0	1	-1
9	125	6	4	2
9	126	5	5	0
9	127	3	3	0
9	128	2	3	-1
9	129	3	5	-2
9	130	7	4	3
9	131	1	5	-4
9	132	6	4	2
9	133	2	4	-2
9	134	6	3	3
9	135	6	5	1
9	136	3	3	0
9	137	8	4	4
9	138	6	10	-4
9	139	6	4	2
9	140	5	7	-2
9	141	3	0	3
9	142	12	3	9
9	143	2	4	-2
10	1	4	2	2
10	2	8	8	0
10	3	7	2	5
10	4	7	7	0
10	5	4	3	1
10	6	1	2	-1
10	7	1	3	-2
10	8	5	6	-1
10	9	6	4	2
10	10	7	4	3
10	11	5	1	4
10	12	6	4	2
10	13	2	4	-2
10	14	5	2	3
10	15	6	3	3
10	16	2	1	1
10	17	6	3	3
10	18	5	3	2
10	19	4	4	0
10	20	4	8	-4
10	21	6	4	2
10	22	4	1	3
10	23	6	3	3
10	24	3	3	0
10	25	5	2	3
10	26	5	9	-4
10	27	4	10	-6
10	28	8	7	1
10	29	5	4	1
10	30	4	6	-2
10	31	8	4	4
10	32	0	0	0
10	33	4	0	4
10	34	4	3	1
10	35	1	0	1
10	36	8	6	2
10	37	8	8	0
10	38	2	1	1
10	39	3	12	-9
10	40	4	9	-5
10	41	3	3	0
10	42	6	4	2
10	43	11	7	4
10	44	6	6	0
10	45	11	3	8
10	46	5	10	-5
10	47	6	5	1
10	48	6	3	3
10	49	5	7	-2
10	50	7	3	4
10	51	7	8	-1
10	52	6	7	-1
10	53	6	7	-1
10	54	4	6	-2
10	55	9	5	4
10	56	9	1	8
10	57	7	9	-2
10	58	7	3	4
10	59	6	6	0
10	60	1	2	-1
10	61	8	6	2
10	62	6	3	3
10	63	4	0	4
10	64	6	7	-1
10	65	7	3	4
10	66	6	2	4
10	67	1	4	-3
10	68	4	1	3
10	69	8	6	2
10	70	6	3	3
10	71	6	3	3
10	72	7	5	2
10	73	6	4	2
10	74	6	6	0
10	75	6	5	1
10	76	6	4	2
10	77	8	7	1
10	78	4	3	1
10	79	5	10	-5
10	80	5	6	-1
10	81	5	6	-1
10	82	6	5	1
10	83	3	9	-6
10	84	7	5	2
10	85	7	3	4
10	86	4	4	0
10	87	5	9	-4
10	88	4	3	1
10	89	7	5	2
10	90	4	5	-1
10	91	6	5	1
10	92	2	3	-1
10	93	4	5	-1
10	94	1	1	0
10	95	8	5	3
10	96	2	6	-4
10	97	4	0	4
10	98	3	4	-1
10	99	5	0	5
10	100	5	3	2
10	101	2	1	1
10	102	12	1	11
10	103	4	2	2
10	104	2	4	-2
10	105	6	8	-2
10	106	6	8	-2
10	107	5	7	-2
10	108	7	4	3
10	109	4	7	-3
10	110	7	4	3
10	111	0	0	0
10	112	4	5	-1
10	113	2	0	2
10	114	5	5	0
10	115	4	1	3
10	116	7	7	0
10	117	4	10	-6
10	118	4	8	-4
10	119	1	2	-1
10	120	2	5	-3
10	121	10	5	5
10	122	6	7	-1
10	123	5	2	3
10	124	8	4	4
10	125	3	8	-5
10	126	6	2	4
10	127	6	3	3
10	128	7	2	5
10	129	2	3	-1
10	130	6	1	5
10	131	4	10	-6
10	132	5	3	2
10	133	5	3	2
10	134	3	7	-4
10	135	2	2	0
10	136	5	3	2
10	137	1	6	-5
10	138	4	4	0
10	139	6	3	3
10	140	6	5	1
10	141	4	4	0
10	142	8	5	3
10	143	2	5	-3
10	144	3	1	2
10	145	3	2	1
10	146	4	3	1
10	147	1	5	-4
10	148	5	3	2
10	149	6	5	1
10	150	12	6	6
10	151	6	7	-1
10	152	7	3	4
10	153	11	7	4
10	154	6	4	2
10	155	6	5	1
10	156	4	5	-1
10	157	4	3	1
10	158	1	0	1
10	159	4	3	1
10	160	2	0	2
10	161	4	6	-2
10	162	9	1	8
10	163	6	5	1
10	164	11	4	7
10	165	8	5	3
10	166	6	8	-2
10	167	4	6	-2
10	168	9	5	4
10	169	7	6	1
10	170	3	3	0
10	171	2	4	-2
10	172	3	5	-2
10	173	2	8	-6
10	174	4	2	2
11	1	2	5	-3
11	2	7	3	4
11	3	5	7	-2
11	4	3	3	0
11	5	5	8	-3
11	6	5	2	3
11	7	2	2	0
11	8	7	4	3
11	9	5	6	-1
11	10	8	6	2
11	11	3	6	-3
11	12	5	3	2
11	13	7	3	4
11	14	4	0	4
11	15	6	4	2
11	16	8	5	3
11	17	5	2	3
11	18	1	2	-1
11	19	3	5	-2
11	20	7	2	5
11	21	6	6	0
11	22	4	5	-1
11	23	3	0	3
11	24	3	4	-1
11	25	5	5	0
11	26	3	2	1
11	27	7	6	1
11	28	1	2	-1
11	29	11	3	8
11	30	7	8	-1
11	31	7	5	2
11	32	4	3	1
11	33	4	5	-1
11	34	6	6	0
11	35	4	5	-1
11	36	11	3	8
11	37	5	1	4
11	38	3	2	1
11	39	8	3	5
11	40	3	4	-1
11	41	4	2	2
11	42	6	1	5
11	43	8	1	7
11	44	3	8	-5
11	45	7	4	3
11	46	3	3	0
11	47	6	4	2
11	48	3	4	-1
11	49	7	8	-1
11	50	3	9	-6
11	51	7	7	0
11	52	8	6	2
11	53	6	7	-1
11	54	1	6	-5
11	55	9	3	6
11	56	5	5	0
11	57	6	1	5
11	58	7	3	4
11	59	8	4	4
11	60	9	10	-1
11	61	8	8	0
11	62	6	4	2
11	63	10	3	7
11	64	9	6	3
11	65	7	3	4
11	66	5	6	-1
11	67	1	3	-2
11	68	4	8	-4
11	69	3	3	0
11	70	7	4	3
11	71	6	1	5
11	72	5	4	1
11	73	2	4	-2
11	74	10	7	3
11	75	7	7	0
11	76	9	9	0
11	77	9	6	3
11	78	4	7	-3
11	79	5	4	1
11	80	2	4	-2
11	81	11	6	5
11	82	4	3	1
11	83	5	3	2
11	84	4	1	3
11	85	9	4	5
11	86	3	3	0
11	87	2	12	-10
11	88	7	7	0
11	89	3	1	2
11	90	7	2	5
11	91	2	3	-1
11	92	9	2	7
11	93	2	3	-1
11	94	0	0	0
11	95	4	5	-1
11	96	3	2	1
11	97	3	8	-5
11	98	6	6	0
11	99	5	4	1
11	100	8	3	5
11	101	4	2	2
11	102	6	3	3
11	103	14	0	14
11	104	7	6	1
11	105	5	5	0
11	106	3	6	-3
11	107	5	5	0
11	108	6	4	2
11	109	4	4	0
11	110	4	5	-1
11	111	6	1	5
11	112	10	3	7
11	113	8	9	-1
11	114	4	6	-2
11	115	3	3	0
11	116	11	5	6
11	117	9	4	5
11	118	3	5	-2
11	119	10	4	6
11	120	7	3	4
11	121	7	6	1
11	122	5	4	1
11	123	6	8	-2
11	124	4	9	-5
11	125	1	5	-4
11	126	3	5	-2
11	127	6	2	4
11	128	7	3	4
11	129	6	5	1
11	130	6	5	1
11	131	7	1	6
11	132	6	2	4
11	133	4	8	-4
11	134	4	4	0
11	135	4	3	1
11	136	1	4	-3
11	137	6	7	-1
11	138	4	6	-2
11	139	5	5	0
11	140	6	5	1
11	141	4	7	-3
11	142	2	4	-2
11	143	4	4	0
11	144	6	3	3
11	145	4	7	-3
11	146	9	3	6
11	147	6	4	2
11	148	4	5	-1
11	149	3	4	-1
11	150	7	8	-1
11	151	3	5	-2
11	152	2	7	-5
11	153	5	3	2
11	154	0	5	-5
11	155	1	1	0
11	156	3	2	1
11	157	8	1	7
11	158	13	4	9
11	159	2	1	1
11	160	7	6	1
11	161	11	3	8
11	162	2	2	0
11	163	7	5	2
11	164	10	0	10
11	165	1	4	-3
11	166	5	4	1
11	167	3	6	-3
11	168	0	1	-1
11	169	9	6	3
11	170	8	2	6
11	171	4	4	0
11	172	2	3	-1
11	173	4	8	-4
11	174	1	4	-3
12	1	3	5	-2
12	2	11	2	9
12	3	4	4	0
12	4	7	4	3
12	5	3	3	0
12	6	5	6	-1
12	7	4	5	-1
12	8	5	3	2
12	9	5	6	-1
12	10	1	3	-2
12	11	7	3	4
12	12	4	2	2
12	13	3	7	-4
12	14	4	9	-5
12	15	4	2	2
12	16	3	6	-3
12	17	3	6	-3
12	18	6	1	5
12	19	3	5	-2
12	20	9	5	4
12	21	5	2	3
12	22	5	6	-1
12	23	0	2	-2
12	24	12	2	10
12	25	6	5	1
12	26	8	5	3
12	27	7	7	0
12	28	9	2	7
12	29	5	5	0
12	30	3	0	3
12	31	7	4	3
12	32	5	3	2
12	33	3	3	0
12	34	4	5	-1
12	35	3	7	-4
12	36	6	3	3
12	37	3	2	1
12	38	2	3	-1
12	39	2	3	-1
12	40	6	3	3
12	41	5	3	2
12	42	4	6	-2
12	43	9	7	2
12	44	7	2	5
12	45	4	5	-1
12	46	7	8	-1
12	47	8	2	6
12	48	3	4	-1
12	49	6	0	6
12	50	3	6	-3
12	51	1	2	-1
12	52	3	6	-3
12	53	10	3	7
12	54	3	4	-1
12	55	5	3	2
12	56	7	4	3
12	57	6	8	-2
12	58	4	6	-2
12	59	1	3	-2
12	60	2	4	-2
12	61	2	2	0
12	62	5	4	1
12	63	5	3	2
12	64	4	2	2
12	65	3	9	-6
12	66	1	3	-2
12	67	6	5	1
12	68	6	7	-1
12	69	5	5	0
12	70	5	5	0
12	71	7	4	3
12	72	7	5	2
12	73	5	4	1
12	74	5	5	0
12	75	8	7	1
12	76	5	8	-3
12	77	9	1	8
12	78	4	3	1
12	79	5	6	-1
12	80	1	1	0
12	81	4	2	2
12	82	1	1	0
12	83	0	2	-2
12	84	5	5	0
12	85	12	2	10
12	86	6	3	3
12	87	9	0	9
12	88	7	8	-1
12	89	4	2	2
12	90	4	5	-1
12	91	5	4	1
12	92	7	5	2
12	93	5	10	-5
12	94	8	0	8
12	95	5	1	4
12	96	13	3	10
12	97	4	4	0
12	98	2	5	-3
12	99	3	4	-1
12	100	3	2	1
12	101	7	9	-2
12	102	9	2	7
12	103	0	3	-3
12	104	4	3	1
12	105	2	3	-1
12	106	8	12	-4
12	107	9	6	3
12	108	6	8	-2
12	109	7	2	5
12	110	4	4	0
12	111	1	4	-3
12	112	8	2	6
12	113	10	6	4
12	114	6	8	-2
12	115	5	4	1
12	116	2	3	-1
12	117	6	6	0
12	118	2	5	-3
12	119	3	5	-2
12	120	3	4	-1
12	121	5	2	3
12	122	3	6	-3
12	123	2	5	-3
12	124	3	4	-1
12	125	4	7	-3
12	126	1	4	-3
12	127	3	5	-2
12	128	3	3	0
12	129	4	4	0
12	130	2	4	-2
12	131	2	3	-1
12	132	7	1	6
12	133	5	4	1
12	134	6	5	1
12	135	6	4	2
12	136	2	6	-4
12	137	4	6	-2
12	138	6	5	1
12	139	0	1	-1
12	140	10	0	10
12	141	6	7	-1
12	142	6	8	-2
12	143	7	1	6
12	144	1	3	-2
12	145	0	1	-1
12	146	8	2	6
12	147	8	11	-3
12	148	4	2	2
12	149	3	3	0
13	1	3	3	0
13	2	4	3	1
13	3	2	3	-1
13	4	9	4	5
13	5	10	10	0
13	6	4	3	1
13	7	4	4	0
13	8	7	8	-1
13	9	2	4	-2
13	10	4	4	0
13	11	2	3	-1
13	12	0	0	0
13	13	3	2	1
13	14	2	2	0
13	15	1	2	-1
13	16	3	3	0
13	17	6	4	2
13	18	3	6	-3
13	19	3	6	-3
13	20	6	6	0
13	21	9	9	0
13	22	3	5	-2
13	23	5	5	0
13	24	2	1	1
13	25	7	6	1
13	26	7	6	1
13	27	8	5	3
13	28	9	5	4
13	29	6	9	-3
13	30	8	4	4
13	31	3	6	-3
13	32	8	8	0
13	33	2	4	-2
13	34	7	3	4
13	35	3	2	1
13	36	3	8	-5
13	37	5	1	4
13	38	7	5	2
13	39	3	3	0
13	40	8	4	4
13	41	6	5	1
13	42	4	9	-5
13	43	3	4	-1
13	44	5	6	-1
13	45	3	3	0
13	46	2	2	0
13	47	1	5	-4
13	48	8	8	0
13	49	6	7	-1
13	50	3	7	-4
13	51	4	5	-1
13	52	5	1	4
13	53	2	4	-2
13	54	2	5	-3
13	55	2	4	-2
13	56	6	6	0
13	57	4	6	-2
13	58	8	5	3
13	59	6	2	4
13	60	6	1	5
13	61	4	6	-2
13	62	7	6	1
13	63	5	4	1
13	64	5	3	2
13	65	1	4	-3
13	66	1	5	-4
13	67	6	8	-2
13	68	5	6	-1
13	69	5	4	1
13	70	8	5	3
13	71	3	7	-4
13	72	4	1	3
13	73	3	3	0
13	74	5	4	1
13	75	8	4	4
13	76	3	3	0
13	77	6	2	4
13	78	3	3	0
13	79	6	6	0
13	80	2	3	-1
13	81	10	8	2
13	82	8	2	6
13	83	4	6	-2
13	84	1	3	-2
13	85	5	2	3
13	86	7	2	5
13	87	4	7	-3
13	88	9	1	8
13	89	5	8	-3
13	90	4	3	1
13	91	7	10	-3
13	92	5	5	0
13	93	1	4	-3
13	94	4	6	-2
13	95	4	8	-4
13	96	3	4	-1
13	97	7	4	3
13	98	4	0	4
13	99	1	2	-1
13	100	1	0	1
13	101	4	0	4
13	102	5	5	0
13	103	5	6	-1
[truncated: 653 more rows]

## Sheet: Ddc > CsChr (uncorrelated)
timeBin	larva	nBendLeft	nBendRight	bendDiff
1	1	3	8	-5
1	2	7	9	-2
1	3	7	2	5
1	4	2	3	-1
1	5	8	8	0
1	6	15	4	11
1	7	3	4	-1
1	8	5	8	-3
1	9	7	3	4
1	10	2	1	1
1	11	0	10	-10
1	12	4	8	-4
1	13	7	7	0
1	14	7	6	1
1	15	6	7	-1
1	16	7	5	2
1	17	3	4	-1
1	18	5	3	2
1	19	7	4	3
1	20	3	4	-1
1	21	5	10	-5
1	22	6	7	-1
1	23	2	9	-7
1	24	4	6	-2
1	25	0	2	-2
1	26	2	0	2
1	27	7	2	5
1	28	8	4	4
1	29	2	3	-1
1	30	5	8	-3
1	31	7	9	-2
1	32	4	2	2
1	33	3	1	2
1	34	9	10	-1
1	35	6	6	0
1	36	5	8	-3
1	37	4	4	0
1	38	9	4	5
1	39	4	4	0
1	40	4	6	-2
1	41	5	6	-1
1	42	0	8	-8
1	43	7	5	2
1	44	5	5	0
1	45	9	9	0
1	46	6	6	0
1	47	6	6	0
1	48	6	3	3
1	49	9	9	0
1	50	5	13	-8
1	51	6	3	3
1	52	10	6	4
1	53	7	2	5
1	54	8	7	1
1	55	12	5	7
1	56	7	8	-1
1	57	8	6	2
1	58	6	10	-4
1	59	11	6	5
1	60	2	5	-3
1	61	4	5	-1
1	62	4	7	-3
1	63	8	8	0
1	64	6	6	0
1	65	7	7	0
1	66	6	8	-2
1	67	11	5	6
1	68	5	1	4
1	69	3	3	0
1	70	10	6	4
1	71	5	6	-1
1	72	6	3	3
1	73	2	2	0
1	74	3	9	-6
1	75	3	2	1
1	76	7	11	-4
1	77	10	4	6
1	78	8	4	4
1	79	4	7	-3
1	80	5	3	2
1	81	11	4	7
1	82	6	5	1
1	83	2	8	-6
1	84	8	4	4
1	85	3	5	-2
1	86	6	5	1
1	87	7	8	-1
1	88	4	4	0
1	89	11	3	8
1	90	3	9	-6
1	91	9	4	5
1	92	3	10	-7
1	93	5	1	4
1	94	3	6	-3
1	95	3	4	-1
1	96	7	2	5
1	97	4	2	2
1	98	7	7	0
1	99	6	9	-3
1	100	13	1	12
1	101	1	5	-4
1	102	1	6	-5
1	103	3	12	-9
1	104	2	4	-2
1	105	7	4	3
1	106	0	1	-1
1	107	7	6	1
1	108	2	3	-1
1	109	1	2	-1
1	110	9	4	5
1	111	6	8	-2
1	112	3	6	-3
1	113	6	6	0
1	114	2	9	-7
1	115	3	6	-3
1	116	4	4	0
1	117	3	5	-2
1	118	7	3	4
1	119	9	4	5
1	120	5	7	-2
1	121	3	3	0
1	122	3	3	0
1	123	4	4	0
1	124	9	4	5
1	125	6	5	1
1	126	7	9	-2
1	127	5	4	1
1	128	7	6	1
1	129	5	4	1
1	130	6	10	-4
1	131	6	7	-1
2	1	4	7	-3
2	2	9	3	6
2	3	9	6	3
2	4	2	7	-5
2	5	3	5	-2
2	6	4	3	1
2	7	5	3	2
2	8	1	3	-2
2	9	7	4	3
2	10	1	7	-6
2	11	3	5	-2
2	12	3	5	-2
2	13	5	4	1
2	14	2	12	-10
2	15	8	3	5
2	16	7	7	0
2	17	7	3	4
2	18	5	5	0
2	19	5	3	2
2	20	5	3	2
2	21	5	8	-3
2	22	8	7	1
2	23	2	1	1
2	24	3	5	-2
2	25	4	3	1
2	26	5	3	2
2	27	5	3	2
2	28	6	3	3
2	29	5	2	3
2	30	6	9	-3
2	31	7	8	-1
2	32	4	4	0
2	33	4	4	0
2	34	4	8	-4
2	35	6	7	-1
2	36	7	4	3
2	37	4	7	-3
2	38	7	3	4
2	39	5	5	0
2	40	4	2	2
2	41	10	0	10
2	42	4	9	-5
2	43	6	11	-5
2	44	7	5	2
2	45	4	5	-1
2	46	7	9	-2
2	47	9	3	6
2	48	8	7	1
2	49	3	9	-6
2	50	2	5	-3
2	51	6	6	0
2	52	4	4	0
2	53	5	11	-6
2	54	4	7	-3
2	55	7	2	5
2	56	4	4	0
2	57	9	6	3
2	58	6	8	-2
2	59	6	6	0
2	60	9	8	1
2	61	6	6	0
2	62	14	6	8
2	63	5	8	-3
2	64	8	7	1
2	65	5	2	3
2	66	7	3	4
2	67	9	3	6
2	68	6	8	-2
2	69	3	5	-2
2	70	5	3	2
2	71	8	3	5
2	72	7	5	2
2	73	5	4	1
2	74	4	6	-2
2	75	4	9	-5
2	76	7	4	3
2	77	5	6	-1
2	78	6	5	1
2	79	4	4	0
2	80	1	7	-6
2	81	8	4	4
2	82	2	7	-5
2	83	1	6	-5
2	84	8	6	2
2	85	10	9	1
2	86	9	6	3
2	87	10	8	2
2	88	11	8	3
2	89	1	5	-4
2	90	4	7	-3
2	91	4	3	1
2	92	5	4	1
2	93	4	5	-1
2	94	7	3	4
2	95	2	8	-6
2	96	6	10	-4
2	97	8	4	4
2	98	2	11	-9
2	99	1	1	0
2	100	4	7	-3
2	101	6	3	3
2	102	8	7	1
2	103	5	1	4
2	104	8	9	-1
2	105	5	5	0
2	106	2	4	-2
2	107	4	3	1
2	108	9	6	3
2	109	3	3	0
2	110	5	5	0
2	111	10	5	5
2	112	3	8	-5
2	113	5	2	3
2	114	6	5	1
2	115	6	4	2
2	116	3	3	0
2	117	5	9	-4
2	118	4	6	-2
2	119	8	1	7
2	120	8	4	4
2	121	2	5	-3
2	122	4	8	-4
2	123	4	2	2
2	124	5	3	2
2	125	4	4	0
2	126	10	8	2
2	127	11	6	5
2	128	7	6	1
2	129	7	9	-2
2	130	4	8	-4
2	131	6	2	4
2	132	1	5	-4
2	133	6	3	3
2	134	3	4	-1
2	135	2	2	0
2	136	6	5	1
2	137	3	4	-1
2	138	0	7	-7
2	139	0	11	-11
2	140	5	5	0
2	141	7	3	4
2	142	4	6	-2
2	143	4	2	2
2	144	4	3	1
2	145	3	5	-2
2	146	5	4	1
2	147	3	5	-2
2	148	7	2	5
2	149	6	11	-5
2	150	3	7	-4
2	151	7	9	-2
2	152	6	9	-3
2	153	5	6	-1
2	154	4	6	-2
2	155	7	9	-2
2	156	3	11	-8
2	157	2	4	-2
3	1	7	4	3
3	2	6	8	-2
3	3	3	5	-2
3	4	8	6	2
3	5	8	1	7
3	6	1	3	-2
3	7	4	7	-3
3	8	6	3	3
3	9	2	2	0
3	10	3	6	-3
3	11	3	7	-4
3	12	0	9	-9
3	13	5	5	0
3	14	8	6	2
3	15	3	3	0
3	16	7	2	5
3	17	7	8	-1
3	18	3	5	-2
3	19	4	5	-1
3	20	3	6	-3
3	21	3	4	-1
3	22	5	5	0
3	23	8	3	5
3	24	6	4	2
3	25	2	5	-3
3	26	8	5	3
3	27	6	6	0
3	28	3	7	-4
3	29	4	4	0
3	30	3	4	-1
3	31	2	2	0
3	32	7	1	6
3	33	3	5	-2
3	34	9	4	5
3	35	2	4	-2
3	36	3	5	-2
3	37	6	9	-3
3	38	9	8	1
3	39	9	2	7
3	40	5	7	-2
3	41	5	5	0
3	42	3	3	0
3	43	6	5	1
3	44	5	1	4
3	45	3	7	-4
3	46	4	6	-2
3	47	10	4	6
3	48	3	6	-3
3	49	5	6	-1
3	50	2	7	-5
3	51	2	5	-3
3	52	4	5	-1
3	53	3	6	-3
3	54	3	4	-1
3	55	8	10	-2
3	56	8	5	3
3	57	5	4	1
3	58	5	3	2
3	59	2	7	-5
3	60	6	4	2
3	61	6	8	-2
3	62	7	7	0
3	63	10	6	4
3	64	5	4	1
3	65	4	7	-3
3	66	9	6	3
3	67	5	2	3
3	68	10	7	3
3	69	8	7	1
3	70	7	4	3
3	71	5	8	-3
3	72	8	8	0
3	73	5	10	-5
3	74	6	3	3
3	75	4	5	-1
3	76	4	6	-2
3	77	12	6	6
3	78	3	4	-1
3	79	3	1	2
3	80	2	6	-4
3	81	9	1	8
3	82	3	8	-5
3	83	4	6	-2
3	84	8	12	-4
3	85	1	5	-4
3	86	5	3	2
3	87	7	6	1
3	88	4	7	-3
3	89	2	2	0
3	90	6	8	-2
3	91	7	5	2
3	92	7	3	4
3	93	4	3	1
3	94	6	4	2
3	95	3	8	-5
3	96	8	8	0
3	97	6	9	-3
3	98	7	1	6
3	99	5	4	1
3	100	7	7	0
3	101	7	4	3
3	102	4	7	-3
3	103	5	4	1
3	104	9	5	4
3	105	6	2	4
3	106	4	7	-3
3	107	6	8	-2
3	108	5	6	-1
3	109	5	2	3
3	110	5	1	4
3	111	4	5	-1
3	112	6	7	-1
3	113	6	4	2
3	114	4	5	-1
3	115	4	4	0
3	116	8	6	2
3	117	4	5	-1
3	118	7	9	-2
3	119	7	3	4
3	120	5	6	-1
3	121	4	5	-1
3	122	6	7	-1
3	123	4	1	3
3	124	6	2	4
3	125	3	2	1
3	126	4	12	-8
3	127	7	6	1
3	128	3	1	2
3	129	4	4	0
3	130	13	3	10
3	131	5	10	-5
3	132	5	3	2
3	133	3	5	-2
3	134	1	2	-1
3	135	8	6	2
3	136	1	3	-2
3	137	3	4	-1
3	138	5	2	3
3	139	7	3	4
3	140	2	3	-1
3	141	4	4	0
3	142	5	0	5
3	143	4	2	2
3	144	4	1	3
3	145	3	4	-1
3	146	5	5	0
3	147	0	6	-6
3	148	4	8	-4
3	149	3	14	-11
3	150	3	7	-4
3	151	0	5	-5
3	152	10	4	6
3	153	1	7	-6
3	154	8	8	0
3	155	5	5	0
3	156	7	4	3
3	157	2	5	-3
3	158	5	3	2
4	1	4	3	1
4	2	4	3	1
4	3	8	2	6
4	4	3	5	-2
4	5	2	7	-5
4	6	6	4	2
4	7	5	3	2
4	8	5	7	-2
4	9	2	6	-4
4	10	7	4	3
4	11	3	7	-4
4	12	4	6	-2
4	13	4	4	0
4	14	5	6	-1
4	15	3	3	0
4	16	1	3	-2
4	17	5	6	-1
4	18	5	4	1
4	19	4	5	-1
4	20	2	2	0
4	21	4	5	-1
4	22	6	2	4
4	23	6	1	5
4	24	4	3	1
4	25	4	5	-1
4	26	2	3	-1
4	27	6	6	0
4	28	3	5	-2
4	29	5	4	1
4	30	4	6	-2
4	31	4	6	-2
4	32	4	6	-2
4	33	7	8	-1
4	34	5	5	0
4	35	7	6	1
4	36	9	4	5
4	37	4	5	-1
4	38	4	4	0
4	39	5	6	-1
4	40	3	7	-4
4	41	9	7	2
4	42	9	2	7
4	43	10	4	6
4	44	9	6	3
4	45	3	3	0
4	46	6	4	2
4	47	5	3	2
4	48	8	7	1
4	49	4	4	0
4	50	6	8	-2
4	51	5	8	-3
4	52	5	5	0
4	53	8	3	5
4	54	5	7	-2
4	55	2	4	-2
4	56	5	5	0
4	57	3	3	0
4	58	7	8	-1
4	59	5	7	-2
4	60	6	5	1
4	61	8	6	2
4	62	6	7	-1
4	63	5	6	-1
4	64	5	13	-8
4	65	3	6	-3
4	66	9	1	8
4	67	6	4	2
4	68	4	7	-3
4	69	4	4	0
4	70	3	6	-3
4	71	8	7	1
4	72	6	9	-3
4	73	5	7	-2
4	74	5	5	0
4	75	6	5	1
4	76	3	9	-6
4	77	7	4	3
4	78	3	9	-6
4	79	7	2	5
4	80	5	9	-4
4	81	8	8	0
4	82	4	4	0
4	83	3	6	-3
4	84	2	6	-4
4	85	2	5	-3
4	86	1	4	-3
4	87	6	6	0
4	88	3	4	-1
4	89	6	6	0
4	90	4	4	0
4	91	4	5	-1
4	92	1	4	-3
4	93	8	4	4
4	94	5	9	-4
4	95	5	3	2
4	96	5	5	0
4	97	5	4	1
4	98	4	4	0
4	99	4	5	-1
4	100	8	2	6
4	101	5	4	1
4	102	8	6	2
4	103	5	10	-5
4	104	9	9	0
4	105	3	10	-7
4	106	3	1	2
4	107	4	4	0
4	108	5	4	1
4	109	9	4	5
4	110	6	5	1
4	111	8	4	4
4	112	5	10	-5
4	113	7	3	4
4	114	8	5	3
4	115	5	6	-1
4	116	2	4	-2
4	117	7	6	1
4	118	4	4	0
4	119	6	12	-6
4	120	3	5	-2
4	121	6	2	4
4	122	9	2	7
4	123	5	8	-3
4	124	3	3	0
4	125	5	5	0
4	126	4	1	3
4	127	6	6	0
4	128	6	4	2
4	129	4	12	-8
4	130	2	4	-2
4	131	8	5	3
4	132	5	8	-3
4	133	4	6	-2
4	134	4	5	-1
4	135	2	8	-6
4	136	4	5	-1
4	137	2	12	-10
4	138	7	2	5
4	139	6	5	1
4	140	6	8	-2
4	141	12	2	10
4	142	3	7	-4
4	143	4	2	2
4	144	8	5	3
4	145	4	2	2
4	146	4	4	0
4	147	0	2	-2
4	148	6	2	4
4	149	5	8	-3
4	150	4	12	-8
4	151	1	6	-5
4	152	2	5	-3
4	153	9	1	8
4	154	3	5	-2
4	155	5	5	0
4	156	4	10	-6
4	157	5	10	-5
4	158	4	7	-3
4	159	10	5	5
4	160	10	6	4
4	161	3	7	-4
4	162	5	10	-5
5	1	4	9	-5
5	2	7	5	2
5	3	10	4	6
5	4	3	0	3
5	5	4	4	0
5	6	0	5	-5
5	7	6	6	0
5	8	6	5	1
5	9	4	6	-2
5	10	6	5	1
5	11	2	4	-2
5	12	3	1	2
5	13	2	6	-4
5	14	5	5	0
5	15	5	5	0
5	16	5	4	1
5	17	3	9	-6
5	18	4	3	1
5	19	3	5	-2
5	20	3	7	-4
5	21	6	7	-1
5	22	2	3	-1
5	23	4	6	-2
5	24	4	5	-1
5	25	4	3	1
5	26	4	5	-1
5	27	5	6	-1
5	28	4	4	0
5	29	5	6	-1
5	30	6	6	0
5	31	5	6	-1
5	32	3	4	-1
5	33	6	4	2
5	34	3	7	-4
5	35	6	6	0
5	36	2	12	-10
5	37	6	10	-4
5	38	6	8	-2
5	39	7	2	5
5	40	6	6	0
5	41	5	3	2
5	42	7	3	4
5	43	16	5	11
5	44	7	5	2
5	45	5	4	1
5	46	4	5	-1
5	47	8	6	2
5	48	8	8	0
5	49	7	6	1
5	50	5	4	1
5	51	9	7	2
5	52	7	7	0
5	53	4	7	-3
5	54	7	7	0
5	55	5	8	-3
5	56	3	9	-6
5	57	7	9	-2
5	58	10	5	5
5	59	4	4	0
5	60	4	6	-2
5	61	3	8	-5
5	62	4	4	0
5	63	7	3	4
5	64	5	6	-1
5	65	7	10	-3
5	66	1	7	-6
5	67	4	9	-5
5	68	6	7	-1
5	69	5	2	3
5	70	9	2	7
5	71	4	4	0
5	72	5	8	-3
5	73	3	6	-3
5	74	4	6	-2
5	75	3	2	1
5	76	5	7	-2
5	77	8	5	3
5	78	2	7	-5
5	79	5	5	0
5	80	10	4	6
5	81	2	5	-3
5	82	1	7	-6
5	83	8	5	3
5	84	7	9	-2
5	85	3	9	-6
5	86	8	8	0
5	87	5	5	0
5	88	6	2	4
5	89	3	3	0
5	90	3	5	-2
5	91	7	5	2
5	92	1	5	-4
5	93	6	6	0
5	94	7	9	-2
5	95	4	9	-5
5	96	4	4	0
5	97	7	4	3
5	98	5	7	-2
5	99	1	2	-1
5	100	5	4	1
5	101	3	5	-2
5	102	8	6	2
5	103	7	9	-2
5	104	10	2	8
5	105	8	7	1
5	106	5	6	-1
5	107	2	5	-3
5	108	6	4	2
5	109	9	3	6
5	110	6	8	-2
5	111	8	4	4
5	112	5	7	-2
5	113	6	4	2
5	114	7	7	0
5	115	8	7	1
5	116	3	4	-1
5	117	2	4	-2
5	118	13	12	1
5	119	5	6	-1
5	120	6	4	2
5	121	7	1	6
5	122	7	5	2
5	123	7	6	1
5	124	6	6	0
5	125	9	5	4
5	126	6	7	-1
5	127	3	5	-2
5	128	6	5	1
5	129	9	5	4
5	130	2	5	-3
5	131	6	5	1
5	132	4	6	-2
5	133	9	6	3
5	134	10	5	5
5	135	3	4	-1
5	136	8	9	-1
5	137	5	4	1
5	138	4	9	-5
5	139	5	5	0
5	140	2	6	-4
5	141	10	7	3
5	142	5	5	0
5	143	2	5	-3
5	144	5	1	4
5	145	2	2	0
5	146	6	9	-3
5	147	7	5	2
5	148	5	2	3
5	149	9	4	5
5	150	7	5	2
5	151	7	7	0
5	152	5	3	2
5	153	7	7	0
5	154	4	2	2
5	155	2	5	-3
5	156	7	3	4
5	157	8	3	5
5	158	4	1	3
5	159	4	3	1
5	160	8	4	4
5	161	11	3	8
5	162	5	3	2
5	163	7	4	3
5	164	2	2	0
5	165	4	10	-6
5	166	10	0	10
5	167	11	8	3
5	168	5	10	-5
5	169	6	9	-3
5	170	2	7	-5
5	171	8	5	3
5	172	4	9	-5
5	173	10	3	7
5	174	5	8	-3
6	1	4	5	-1
6	2	8	5	3
6	3	4	8	-4
6	4	6	5	1
6	5	2	7	-5
6	6	5	3	2
6	7	5	2	3
6	8	5	4	1
6	9	5	7	-2
6	10	4	8	-4
6	11	2	4	-2
6	12	3	6	-3
6	13	6	5	1
6	14	7	6	1
6	15	6	5	1
6	16	2	5	-3
6	17	4	5	-1
6	18	8	2	6
6	19	3	9	-6
6	20	4	5	-1
6	21	14	4	10
6	22	3	5	-2
6	23	1	5	-4
6	24	2	7	-5
6	25	7	6	1
6	26	4	11	-7
6	27	6	9	-3
6	28	2	2	0
6	29	8	8	0
6	30	5	7	-2
6	31	2	1	1
6	32	5	7	-2
6	33	4	6	-2
6	34	4	13	-9
6	35	5	7	-2
6	36	5	3	2
6	37	2	6	-4
6	38	9	8	1
6	39	0	6	-6
6	40	6	9	-3
6	41	5	7	-2
6	42	5	3	2
6	43	10	6	4
6	44	2	4	-2
6	45	4	5	-1
6	46	5	4	1
6	47	5	4	1
6	48	9	5	4
6	49	4	3	1
6	50	5	5	0
6	51	5	3	2
6	52	4	5	-1
6	53	5	5	0
6	54	3	8	-5
6	55	9	13	-4
6	56	3	7	-4
6	57	5	2	3
6	58	6	4	2
6	59	9	6	3
6	60	10	4	6
6	61	6	8	-2
6	62	5	5	0
6	63	6	2	4
6	64	3	2	1
6	65	5	6	-1
6	66	3	5	-2
6	67	6	4	2
6	68	4	6	-2
6	69	5	9	-4
6	70	11	7	4
6	71	5	7	-2
6	72	8	6	2
6	73	4	6	-2
6	74	3	3	0
6	75	5	9	-4
6	76	5	4	1
6	77	3	3	0
6	78	5	0	5
6	79	2	4	-2
6	80	6	1	5
6	81	2	4	-2
6	82	3	5	-2
6	83	7	3	4
6	84	2	1	1
6	85	5	4	1
6	86	6	6	0
6	87	12	3	9
6	88	3	9	-6
6	89	6	3	3
6	90	3	1	2
6	91	8	5	3
6	92	6	6	0
6	93	4	4	0
6	94	7	7	0
6	95	7	0	7
6	96	5	2	3
6	97	1	4	-3
6	98	1	0	1
6	99	5	8	-3
6	100	4	1	3
6	101	7	1	6
6	102	3	2	1
6	103	4	7	-3
6	104	5	5	0
6	105	3	1	2
6	106	5	5	0
6	107	3	4	-1
6	108	7	4	3
6	109	11	5	6
6	110	1	7	-6
6	111	1	2	-1
6	112	4	4	0
6	113	2	4	-2
6	114	2	5	-3
6	115	4	6	-2
6	116	4	7	-3
6	117	9	6	3
6	118	2	5	-3
6	119	7	9	-2
6	120	10	2	8
6	121	7	4	3
6	122	4	8	-4
6	123	6	8	-2
6	124	4	5	-1
7	1	7	5	2
7	2	3	6	-3
7	3	3	6	-3
7	4	8	2	6
7	5	4	1	3
7	6	4	1	3
7	7	4	5	-1
7	8	2	8	-6
7	9	3	2	1
7	10	7	1	6
7	11	3	7	-4
7	12	4	5	-1
7	13	5	9	-4
7	14	8	4	4
7	15	9	6	3
7	16	2	10	-8
7	17	8	7	1
7	18	4	1	3
7	19	2	7	-5
7	20	4	4	0
7	21	1	3	-2
7	22	1	4	-3
7	23	3	5	-2
7	24	3	4	-1
7	25	6	5	1
7	26	6	5	1
7	27	9	9	0
7	28	4	2	2
7	29	2	2	0
7	30	2	6	-4
7	31	5	5	0
7	32	4	6	-2
7	33	5	7	-2
7	34	0	5	-5
7	35	6	5	1
7	36	3	3	0
7	37	4	7	-3
7	38	9	0	9
7	39	5	8	-3
7	40	6	5	1
7	41	3	7	-4
7	42	2	3	-1
7	43	4	9	-5
7	44	6	4	2
7	45	2	5	-3
7	46	5	7	-2
7	47	7	0	7
7	48	4	6	-2
7	49	7	6	1
7	50	2	7	-5
7	51	5	6	-1
7	52	6	5	1
7	53	7	10	-3
7	54	8	3	5
7	55	5	4	1
7	56	4	10	-6
7	57	2	5	-3
7	58	5	5	0
7	59	5	9	-4
7	60	4	5	-1
7	61	5	4	1
7	62	9	7	2
7	63	6	6	0
7	64	5	7	-2
7	65	7	3	4
7	66	4	4	0
7	67	2	4	-2
7	68	6	6	0
7	69	3	2	1
7	70	8	8	0
7	71	3	5	-2
7	72	8	5	3
7	73	5	4	1
7	74	4	5	-1
7	75	8	2	6
7	76	5	6	-1
7	77	5	8	-3
7	78	4	8	-4
7	79	7	6	1
7	80	1	7	-6
7	81	11	1	10
7	82	3	4	-1
7	83	4	6	-2
7	84	9	10	-1
7	85	4	6	-2
7	86	2	3	-1
7	87	10	7	3
7	88	4	4	0
7	89	6	2	4
7	90	2	5	-3
7	91	8	5	3
7	92	3	6	-3
7	93	10	10	0
7	94	8	7	1
7	95	3	4	-1
7	96	7	6	1
7	97	6	5	1
7	98	7	7	0
7	99	2	6	-4
7	100	3	7	-4
7	101	3	9	-6
7	102	9	1	8
7	103	6	5	1
7	104	4	6	-2
7	105	11	8	3
7	106	2	1	1
7	107	6	2	4
7	108	5	2	3
7	109	3	1	2
7	110	4	1	3
7	111	6	3	3
7	112	8	6	2
7	113	4	5	-1
7	114	7	7	0
7	115	8	4	4
7	116	7	6	1
7	117	7	4	3
7	118	2	6	-4
7	119	4	4	0
7	120	7	3	4
7	121	3	1	2
7	122	8	3	5
7	123	4	2	2
7	124	2	1	1
7	125	3	5	-2
7	126	7	9	-2
7	127	5	5	0
7	128	4	3	1
7	129	2	3	-1
7	130	3	8	-5
7	131	2	6	-4
7	132	8	10	-2
7	133	4	4	0
7	134	5	4	1
7	135	7	9	-2
7	136	4	5	-1
7	137	6	2	4
7	138	3	4	-1
7	139	4	8	-4
7	140	5	9	-4
7	141	5	8	-3
7	142	15	5	10
7	143	4	6	-2
7	144	0	0	0
7	145	1	0	1
7	146	4	7	-3
7	147	2	6	-4
7	148	4	7	-3
7	149	3	0	3
7	150	4	3	1
7	151	6	5	1
7	152	7	3	4
7	153	5	5	0
7	154	3	5	-2
7	155	3	5	-2
7	156	9	5	4
7	157	6	7	-1
7	158	4	2	2
7	159	6	5	1
7	160	5	7	-2
8	1	4	4	0
8	2	5	5	0
8	3	6	3	3
8	4	3	5	-2
8	5	6	4	2
8	6	5	2	3
8	7	8	3	5
8	8	1	4	-3
8	9	2	2	0
8	10	7	2	5
8	11	5	6	-1
8	12	8	6	2
8	13	8	7	1
8	14	3	5	-2
8	15	2	2	0
8	16	3	2	1
8	17	4	4	0
8	18	3	3	0
8	19	4	4	0
8	20	5	4	1
8	21	3	4	-1
8	22	7	4	3
8	23	1	1	0
8	24	4	6	-2
8	25	5	5	0
8	26	2	6	-4
8	27	3	5	-2
8	28	3	7	-4
8	29	11	6	5
8	30	5	1	4
8	31	5	4	1
8	32	7	6	1
8	33	6	2	4
8	34	4	8	-4
8	35	7	4	3
8	36	8	3	5
8	37	7	13	-6
8	38	9	3	6
8	39	5	5	0
8	40	1	6	-5
8	41	8	0	8
8	42	5	9	-4
8	43	0	2	-2
8	44	8	5	3
8	45	3	4	-1
8	46	4	7	-3
8	47	5	4	1
8	48	8	11	-3
8	49	6	9	-3
8	50	9	8	1
8	51	1	4	-3
8	52	2	5	-3
8	53	5	6	-1
8	54	6	3	3
8	55	8	5	3
8	56	5	1	4
8	57	4	7	-3
8	58	3	8	-5
8	59	3	5	-2
8	60	4	7	-3
8	61	4	8	-4
8	62	7	5	2
8	63	4	9	-5
8	64	2	2	0
8	65	6	7	-1
8	66	7	5	2
8	67	4	8	-4
8	68	2	3	-1
8	69	4	6	-2
8	70	6	1	5
8	71	7	4	3
8	72	1	5	-4
8	73	5	2	3
8	74	9	5	4
8	75	3	4	-1
8	76	5	6	-1
8	77	5	5	0
8	78	8	2	6
8	79	4	5	-1
8	80	5	4	1
8	81	4	3	1
8	82	9	6	3
8	83	4	6	-2
8	84	6	8	-2
8	85	6	3	3
8	86	3	1	2
8	87	7	13	-6
8	88	4	5	-1
8	89	5	4	1
8	90	4	1	3
8	91	3	2	1
8	92	7	9	-2
8	93	1	6	-5
8	94	2	6	-4
8	95	2	4	-2
8	96	5	7	-2
8	97	5	6	-1
8	98	9	2	7
8	99	3	3	0
8	100	5	8	-3
8	101	7	8	-1
8	102	8	9	-1
8	103	7	2	5
8	104	8	9	-1
8	105	5	6	-1
8	106	11	10	1
8	107	4	0	4
8	108	4	4	0
8	109	9	5	4
8	110	10	2	8
8	111	5	4	1
8	112	6	8	-2
8	113	5	5	0
8	114	9	8	1
8	115	8	6	2
8	116	1	8	-7
8	117	6	4	2
8	118	4	4	0
8	119	5	6	-1
8	120	4	3	1
8	121	5	2	3
8	122	5	9	-4
8	123	8	6	2
8	124	3	3	0
8	125	1	7	-6
8	126	4	1	3
8	127	3	7	-4
8	128	6	4	2
8	129	6	2	4
8	130	4	4	0
8	131	4	4	0
8	132	6	6	0
8	133	1	5	-4
8	134	3	9	-6
8	135	4	3	1
8	136	8	4	4
8	137	5	2	3
8	138	1	9	-8
8	139	5	8	-3
8	140	12	2	10
8	141	3	5	-2
8	142	8	4	4
8	143	4	7	-3
8	144	10	5	5
8	145	1	7	-6
8	146	2	7	-5
8	147	4	3	1
8	148	5	2	3
8	149	4	2	2
8	150	7	10	-3
8	151	2	1	1
8	152	1	3	-2
8	153	4	7	-3
8	154	6	5	1
8	155	9	5	4
8	156	4	5	-1
8	157	5	6	-1
8	158	6	9	-3
8	159	10	5	5
8	160	6	5	1
9	1	3	5	-2
9	2	4	6	-2
9	3	10	7	3
9	4	2	8	-6
9	5	5	5	0
9	6	8	4	4
9	7	3	6	-3
9	8	6	4	2
9	9	6	7	-1
9	10	3	7	-4
9	11	3	2	1
9	12	6	11	-5
9	13	2	5	-3
9	14	4	4	0
9	15	4	2	2
9	16	2	7	-5
9	17	8	3	5
9	18	5	6	-1
9	19	5	3	2
9	20	3	4	-1
9	21	6	9	-3
9	22	9	9	0
9	23	3	4	-1
9	24	4	8	-4
9	25	6	6	0
9	26	7	4	3
9	27	7	9	-2
9	28	9	5	4
9	29	2	4	-2
9	30	10	12	-2
9	31	3	3	0
9	32	4	8	-4
9	33	6	6	0
9	34	3	9	-6
9	35	4	2	2
9	36	3	2	1
9	37	4	3	1
9	38	8	6	2
9	39	3	6	-3
9	40	1	3	-2
9	41	4	5	-1
9	42	7	4	3
9	43	4	4	0
9	44	7	10	-3
9	45	1	4	-3
9	46	5	3	2
9	47	5	5	0
9	48	3	4	-1
9	49	8	5	3
9	50	7	11	-4
9	51	10	7	3
9	52	7	9	-2
9	53	4	9	-5
9	54	8	8	0
9	55	5	4	1
9	56	4	5	-1
9	57	5	4	1
9	58	7	9	-2
9	59	5	9	-4
9	60	5	4	1
9	61	6	8	-2
9	62	1	3	-2
9	63	3	6	-3
9	64	5	6	-1
9	65	3	5	-2
9	66	5	3	2
9	67	11	2	9
9	68	5	6	-1
9	69	4	9	-5
9	70	4	8	-4
9	71	2	2	0
9	72	9	8	1
9	73	3	5	-2
9	74	7	7	0
9	75	5	2	3
9	76	4	4	0
9	77	7	7	0
9	78	11	7	4
9	79	12	6	6
9	80	8	6	2
9	81	3	5	-2
9	82	8	5	3
9	83	3	3	0
9	84	3	2	1
9	85	6	7	-1
9	86	8	6	2
9	87	3	6	-3
9	88	11	9	2
9	89	3	0	3
9	90	5	0	5
9	91	2	3	-1
9	92	3	2	1
9	93	4	4	0
9	94	5	5	0
9	95	9	3	6
9	96	2	4	-2
9	97	4	6	-2
9	98	2	5	-3
9	99	5	2	3
9	100	3	1	2
9	101	4	4	0
9	102	7	8	-1
9	103	3	7	-4
9	104	7	9	-2
9	105	3	2	1
9	106	3	3	0
9	107	10	9	1
9	108	4	4	0
9	109	9	5	4
9	110	7	5	2
9	111	5	5	0
9	112	8	6	2
9	113	6	5	1
9	114	4	6	-2
9	115	4	3	1
9	116	5	3	2
9	117	2	6	-4
9	118	6	7	-1
9	119	4	5	-1
9	120	4	5	-1
9	121	3	6	-3
9	122	6	5	1
9	123	7	10	-3
9	124	4	4	0
9	125	3	7	-4
9	126	3	5	-2
9	127	9	7	2
9	128	10	10	0
9	129	5	6	-1
9	130	5	4	1
9	131	3	3	0
9	132	3	7	-4
9	133	5	1	4
9	134	6	4	2
9	135	7	7	0
9	136	4	7	-3
9	137	6	3	3
9	138	4	5	-1
9	139	3	4	-1
9	140	0	4	-4
9	141	5	4	1
9	142	4	1	3
9	143	5	8	-3
9	144	8	8	0
9	145	5	5	0
9	146	6	8	-2
9	147	7	10	-3
10	1	8	6	2
10	2	6	5	1
10	3	8	8	0
10	4	4	3	1
10	5	3	7	-4
10	6	5	4	1
10	7	7	2	5
10	8	5	3	2
10	9	6	3	3
10	10	4	5	-1
10	11	3	5	-2
10	12	6	3	3
10	13	11	9	2
10	14	2	7	-5
10	15	4	5	-1
10	16	8	6	2
10	17	6	7	-1
10	18	5	2	3
10	19	4	1	3
10	20	4	5	-1
10	21	7	7	0
10	22	5	2	3
10	23	5	8	-3
10	24	5	3	2
10	25	4	5	-1
10	26	3	6	-3
10	27	2	3	-1
10	28	5	2	3
10	29	7	7	0
10	30	3	3	0
10	31	4	3	1
10	32	5	6	-1
10	33	0	5	-5
10	34	5	6	-1
10	35	6	12	-6
10	36	3	5	-2
10	37	7	10	-3
10	38	9	5	4
10	39	6	3	3
10	40	6	4	2
10	41	5	7	-2
10	42	6	7	-1
10	43	6	4	2
10	44	13	9	4
10	45	7	7	0
10	46	3	8	-5
10	47	2	1	1
10	48	7	4	3
10	49	4	7	-3
10	50	3	7	-4
10	51	11	8	3
10	52	5	9	-4
10	53	9	8	1
10	54	6	5	1
10	55	7	5	2
10	56	7	4	3
10	57	4	3	1
10	58	7	5	2
10	59	6	4	2
10	60	6	4	2
10	61	6	6	0
10	62	6	4	2
10	63	4	9	-5
10	64	6	3	3
10	65	6	4	2
10	66	4	6	-2
10	67	7	1	6
10	68	11	5	6
10	69	6	4	2
10	70	3	2	1
10	71	5	4	1
10	72	8	8	0
10	73	4	9	-5
10	74	2	1	1
10	75	8	5	3
10	76	4	9	-5
10	77	6	6	0
10	78	7	5	2
10	79	8	3	5
10	80	9	12	-3
10	81	7	7	0
10	82	6	7	-1
10	83	3	5	-2
10	84	1	6	-5
10	85	7	8	-1
10	86	7	2	5
10	87	1	4	-3
10	88	4	3	1
10	89	3	3	0
10	90	7	6	1
10	91	3	9	-6
10	92	6	5	1
10	93	5	6	-1
10	94	5	2	3
10	95	4	3	1
10	96	1	2	-1
10	97	0	0	0
10	98	3	4	-1
10	99	6	7	-1
10	100	5	4	1
10	101	7	7	0
10	102	8	6	2
10	103	4	2	2
10	104	7	3	4
10	105	4	5	-1
10	106	3	6	-3
10	107	5	10	-5
10	108	1	2	-1
10	109	7	4	3
10	110	7	4	3
10	111	9	3	6
10	112	4	10	-6
10	113	4	1	3
10	114	8	4	4
10	115	8	5	3
10	116	7	2	5
10	117	4	5	-1
10	118	4	5	-1
10	119	3	5	-2
10	120	7	8	-1
10	121	5	8	-3
10	122	6	6	0
10	123	4	5	-1
10	124	7	2	5
10	125	7	3	4
10	126	4	5	-1
10	127	6	4	2
10	128	3	5	-2
10	129	5	6	-1
10	130	5	3	2
10	131	2	8	-6
10	132	8	5	3
10	133	8	4	4
10	134	5	5	0
10	135	9	4	5
10	136	4	9	-5
10	137	9	4	5
10	138	5	6	-1
10	139	2	8	-6
10	140	5	4	1
10	141	4	8	-4
11	1	7	5	2
11	2	2	7	-5
11	3	8	8	0
11	4	7	6	1
11	5	8	5	3
11	6	6	2	4
11	7	3	4	-1
11	8	6	4	2
11	9	8	5	3
11	10	4	3	1
11	11	2	4	-2
11	12	3	1	2
11	13	5	9	-4
11	14	5	5	0
11	15	5	5	0
11	16	5	1	4
11	17	4	3	1
11	18	4	8	-4
11	19	4	3	1
11	20	7	3	4
11	21	3	4	-1
11	22	10	8	2
11	23	2	4	-2
11	24	4	7	-3
11	25	4	7	-3
11	26	4	2	2
11	27	8	8	0
11	28	8	3	5
11	29	4	5	-1
11	30	7	3	4
11	31	7	4	3
11	32	4	3	1
11	33	6	6	0
11	34	6	1	5
11	35	6	8	-2
11	36	8	7	1
11	37	9	5	4
11	38	11	6	5
11	39	5	7	-2
11	40	3	8	-5
11	41	7	5	2
11	42	5	5	0
11	43	6	6	0
11	44	7	2	5
11	45	8	2	6
11	46	12	6	6
11	47	5	4	1
11	48	3	7	-4
11	49	5	7	-2
11	50	2	4	-2
11	51	7	9	-2
11	52	6	5	1
11	53	4	3	1
11	54	6	4	2
11	55	8	9	-1
11	56	5	8	-3
11	57	6	6	0
11	58	4	2	2
11	59	7	4	3
11	60	5	2	3
11	61	5	3	2
11	62	6	8	-2
11	63	6	6	0
11	64	5	2	3
11	65	4	4	0
11	66	1	3	-2
11	67	8	9	-1
11	68	8	9	-1
11	69	1	4	-3
11	70	7	4	3
11	71	5	4	1
11	72	2	6	-4
11	73	8	8	0
11	74	7	5	2
11	75	5	2	3
11	76	0	5	-5
11	77	8	5	3
11	78	5	8	-3
11	79	5	4	1
11	80	0	3	-3
11	81	4	6	-2
11	82	3	3	0
11	83	2	6	-4
11	84	2	5	-3
11	85	5	8	-3
11	86	9	5	4
11	87	6	11	-5
11	88	5	11	-6
11	89	3	7	-4
11	90	5	5	0
11	91	8	5	3
11	92	3	4	-1
11	93	4	7	-3
11	94	7	11	-4
11	95	7	6	1
11	96	9	10	-1
11	97	8	12	-4
11	98	2	5	-3
11	99	7	6	1
11	100	4	1	3
11	101	1	2	-1
11	102	7	9	-2
11	103	5	4	1
11	104	2	2	0
11	105	0	0	0
11	106	4	4	0
11	107	4	2	2
11	108	1	0	1
11	109	7	9	-2
11	110	5	8	-3
11	111	7	7	0
11	112	2	5	-3
11	113	10	10	0
11	114	7	4	3
11	115	0	1	-1
11	116	7	5	2
11	117	0	5	-5
11	118	5	7	-2
11	119	7	6	1
11	120	10	6	4
11	121	10	7	3
11	122	5	4	1
11	123	2	6	-4
11	124	3	5	-2
11	125	8	5	3
11	126	6	9	-3
11	127	5	4	1
11	128	2	2	0
11	129	10	3	7
11	130	4	8	-4
11	131	11	7	4
11	132	4	1	3
11	133	6	5	1
11	134	7	10	-3
11	135	6	7	-1
11	136	4	6	-2
11	137	7	5	2
11	138	4	8	-4
11	139	4	3	1
11	140	0	3	-3
11	141	2	2	0
11	142	4	3	1
11	143	7	5	2
11	144	7	7	0
11	145	6	1	5
11	146	1	1	0
11	147	3	6	-3
11	148	5	12	-7
11	149	1	5	-4
11	150	10	4	6
11	151	9	3	6
11	152	8	8	0
11	153	2	3	-1
11	154	4	2	2
11	155	4	8	-4
11	156	1	6	-5
11	157	3	6	-3
11	158	4	1	3
11	159	6	9	-3
11	160	6	9	-3
11	161	9	6	3
11	162	5	3	2
12	1	4	2	2
12	2	2	4	-2
12	3	2	2	0
12	4	6	3	3
12	5	11	1	10
12	6	2	5	-3
12	7	6	3	3
12	8	2	5	-3
12	9	5	0	5
12	10	0	5	-5
12	11	5	2	3
12	12	8	7	1
12	13	4	6	-2
12	14	2	4	-2
12	15	6	8	-2
12	16	7	8	-1
12	17	7	2	5
12	18	0	0	0
12	19	3	9	-6
12	20	2	1	1
12	21	3	7	-4
12	22	3	8	-5
12	23	6	8	-2
12	24	4	2	2
12	25	4	5	-1
12	26	5	1	4
12	27	5	10	-5
12	28	5	5	0
12	29	7	6	1
12	30	6	2	4
12	31	2	4	-2
12	32	5	7	-2
12	33	7	9	-2
12	34	6	4	2
12	35	2	4	-2
12	36	5	3	2
12	37	9	5	4
12	38	4	11	-7
12	39	10	9	1
12	40	6	5	1
12	41	4	4	0
12	42	2	1	1
12	43	5	4	1
12	44	6	6	0
12	45	2	3	-1
12	46	6	5	1
12	47	5	4	1
12	48	6	5	1
12	49	5	4	1
12	50	3	4	-1
12	51	5	4	1
12	52	5	9	-4
12	53	2	3	-1
12	54	3	4	-1
12	55	4	6	-2
12	56	1	7	-6
12	57	5	5	0
12	58	3	3	0
12	59	4	6	-2
12	60	4	4	0
12	61	5	5	0
12	62	7	1	6
12	63	7	3	4
12	64	4	5	-1
12	65	8	6	2
12	66	5	3	2
12	67	1	5	-4
12	68	6	6	0
12	69	6	6	0
12	70	6	6	0
12	71	3	3	0
12	72	5	4	1
12	73	4	4	0
12	74	2	6	-4
12	75	7	4	3
12	76	5	5	0
12	77	2	6	-4
12	78	3	4	-1
12	79	7	5	2
12	80	8	6	2
12	81	6	7	-1
12	82	5	6	-1
12	83	5	9	-4
12	84	8	2	6
12	85	4	6	-2
12	86	3	3	0
12	87	10	3	7
12	88	9	5	4
12	89	1	2	-1
12	90	3	5	-2
12	91	4	7	-3
12	92	4	5	-1
12	93	4	3	1
12	94	8	3	5
12	95	8	1	7
12	96	3	4	-1
12	97	4	2	2
12	98	3	3	0
12	99	9	3	6
12	100	6	8	-2
12	101	6	5	1
12	102	8	3	5
12	103	5	5	0
12	104	5	2	3
12	105	6	7	-1
12	106	2	1	1
12	107	0	6	-6
12	108	3	3	0
12	109	3	3	0
12	110	2	6	-4
12	111	5	7	-2
12	112	8	5	3
12	113	12	5	7
12	114	5	3	2
12	115	11	7	4
12	116	4	8	-4
12	117	3	2	1
12	118	8	4	4
12	119	3	4	-1
12	120	7	5	2
12	121	3	7	-4
12	122	3	5	-2
12	123	4	4	0
12	124	5	4	1
12	125	3	10	-7
12	126	1	3	-2
12	127	11	9	2
12	128	3	7	-4
12	129	2	4	-2
12	130	4	3	1
12	131	7	6	1
12	132	6	4	2
12	133	0	5	-5
12	134	8	5	3
12	135	4	2	2
12	136	5	7	-2
12	137	3	6	-3
12	138	5	10	-5
12	139	4	4	0
12	140	4	11	-7
12	141	4	3	1
12	142	7	3	4
12	143	2	4	-2
12	144	1	3	-2
12	145	2	3	-1
12	146	7	2	5
12	147	3	3	0
12	148	5	5	0
12	149	9	8	1
12	150	3	4	-1
12	151	6	4	2
12	152	1	9	-8
12	153	5	6	-1
12	154	8	3	5
12	155	2	4	-2
12	156	4	4	0
12	157	4	7	-3
12	158	3	8	-5
12	159	3	5	-2
12	160	1	1	0
12	161	4	9	-5
12	162	7	5	2
12	163	8	6	2
13	1	2	4	-2
13	2	9	4	5
13	3	4	5	-1
13	4	5	5	0
13	5	6	7	-1
13	6	2	2	0
13	7	3	6	-3
13	8	3	4	-1
13	9	3	7	-4
13	10	9	6	3
13	11	4	2	2
13	12	6	5	1
13	13	7	3	4
13	14	8	7	1
13	15	3	3	0
13	16	5	7	-2
13	17	6	4	2
13	18	4	4	0
13	19	8	6	2
13	20	2	5	-3
13	21	3	5	-2
13	22	7	6	1
13	23	6	3	3
13	24	3	5	-2
13	25	4	5	-1
13	26	4	4	0
13	27	7	3	4
13	28	6	2	4
13	29	4	5	-1
13	30	5	3	2
13	31	3	0	3
13	32	8	4	4
13	33	7	4	3
13	34	3	2	1
13	35	5	5	0
13	36	8	7	1
13	37	3	4	-1
13	38	6	9	-3
13	39	5	5	0
13	40	8	8	0
13	41	8	9	-1
13	42	5	5	0
13	43	2	4	-2
13	44	4	4	0
13	45	8	4	4
13	46	5	5	0
13	47	8	3	5
13	48	1	7	-6
13	49	6	2	4
13	50	5	7	-2
13	51	2	5	-3
13	52	7	6	1
13	53	5	7	-2
13	54	7	2	5
13	55	8	5	3
13	56	11	6	5
13	57	6	9	-3
13	58	6	10	-4
13	59	8	9	-1
13	60	2	4	-2
13	61	7	4	3
13	62	4	5	-1
13	63	5	3	2
13	64	5	4	1
13	65	4	5	-1
13	66	9	6	3
13	67	2	8	-6
13	68	7	9	-2
13	69	3	4	-1
13	70	2	6	-4
13	71	5	2	3
13	72	6	6	0
13	73	4	6	-2
13	74	6	3	3
13	75	3	6	-3
13	76	7	7	0
13	77	3	3	0
13	78	10	8	2
13	79	5	8	-3
13	80	3	2	1
13	81	3	3	0
13	82	9	5	4
13	83	4	6	-2
13	84	2	2	0
13	85	1	7	-6
13	86	4	6	-2
13	87	6	3	3
13	88	6	10	-4
13	89	9	4	5
13	90	7	9	-2
13	91	6	2	4
13	92	6	4	2
13	93	5	7	-2
13	94	5	5	0
13	95	3	7	-4
13	96	6	4	2
13	97	7	6	1
13	98	10	8	2
13	99	5	8	-3
13	100	7	6	1
13	101	4	8	-4
13	102	0	5	-5
13	103	3	9	-6
13	104	4	8	-4
13	105	6	5	1
13	106	3	8	-5
13	107	3	4	-1
13	108	6	4	2
13	109	4	1	3
13	110	10	8	2
13	111	7	7	0
13	112	6	4	2
13	113	4	7	-3
13	114	6	6	0
13	115	6	7	-1
13	116	4	2	2
13	117	3	4	-1
13	118	3	1	2
13	119	7	5	2
13	120	4	7	-3
13	121	10	4	6
13	122	0	3	-3
13	123	9	8	1
13	124	3	4	-1
13	125	2	6	-4
13	126	8	4	4
13	127	4	3	1
13	128	6	3	3
13	129	7	7	0
13	130	11	8	3
13	131	4	7	-3
13	132	3	5	-2
13	133	11	8	3
13	134	9	3	6
13	135	3	7	-4
13	136	8	8	0
13	137	10	6	4
13	138	6	3	3
13	139	3	1	2
13	140	4	2	2
13	141	4	4	0
13	142	7	6	1
13	143	7	4	3
13	144	6	3	3
13	145	0	4	-4
13	146	6	5	1
13	147	4	7	-3
13	148	11	5	6
13	149	7	3	4
13	150	4	3	1
13	151	5	4	1
13	152	9	3	6
13	153	9	3	6
13	154	4	5	-1
13	155	4	1	3
13	156	10	10	0
13	157	6	6	0
13	158	9	5	4
13	159	3	9	-6
13	160	9	10	-1
[truncated: 633 more rows]

## Sheet: Ddc > CsChr, tsh > Gal80
timeBin	larva	nBendStim	nBendUnstim	bendDiff
1	1	7	7	0
1	2	2	8	-6
1	3	5	4	1
1	4	7	7	0
1	5	3	8	-5
1	6	9	8	1
1	7	7	4	3
1	8	2	11	-9
1	9	9	2	7
1	10	8	5	3
1	11	5	2	3
1	12	5	6	-1
1	13	1	2	-1
1	14	2	4	-2
1	15	1	1	0
1	16	3	3	0
1	17	3	3	0
1	18	7	7	0
1	19	3	4	-1
1	20	8	14	-6
1	21	10	9	1
1	22	3	6	-3
1	23	8	7	1
1	24	8	9	-1
1	25	4	5	-1
1	26	4	7	-3
1	27	8	9	-1
1	28	5	1	4
1	29	4	5	-1
1	30	3	12	-9
1	31	3	2	1
1	32	3	6	-3
1	33	7	7	0
1	34	7	5	2
1	35	11	3	8
1	36	1	4	-3
1	37	4	6	-2
1	38	6	2	4
1	39	7	10	-3
1	40	3	3	0
1	41	7	5	2
1	42	1	6	-5
1	43	9	3	6
1	44	8	7	1
1	45	5	6	-1
1	46	5	3	2
1	47	3	6	-3
1	48	6	0	6
1	49	3	3	0
1	50	4	10	-6
1	51	3	4	-1
1	52	5	3	2
1	53	3	3	0
1	54	3	0	3
1	55	0	3	-3
1	56	2	0	2
1	57	3	1	2
1	58	2	6	-4
1	59	8	3	5
1	60	4	1	3
1	61	4	4	0
1	62	2	5	-3
1	63	3	5	-2
1	64	2	2	0
1	65	6	8	-2
1	66	3	4	-1
1	67	8	7	1
1	68	0	9	-9
1	69	1	0	1
1	70	6	4	2
1	71	4	7	-3
1	72	1	5	-4
1	73	8	6	2
1	74	8	2	6
1	75	9	6	3
1	76	4	6	-2
1	77	5	4	1
1	78	7	7	0
1	79	3	7	-4
1	80	4	4	0
1	81	2	2	0
1	82	8	5	3
1	83	6	6	0
1	84	0	2	-2
1	85	4	3	1
1	86	8	10	-2
1	87	4	7	-3
1	88	0	0	0
1	89	0	2	-2
1	90	1	1	0
1	91	2	6	-4
1	92	2	2	0
1	93	3	6	-3
1	94	7	7	0
1	95	0	0	0
1	96	1	3	-2
1	97	2	3	-1
1	98	5	10	-5
1	99	3	2	1
1	100	2	1	1
1	101	1	1	0
1	102	0	1	-1
1	103	6	5	1
1	104	8	9	-1
1	105	3	3	0
1	106	9	8	1
1	107	1	1	0
1	108	7	9	-2
1	109	6	2	4
1	110	5	3	2
1	111	7	8	-1
1	112	1	3	-2
1	113	5	4	1
1	114	3	1	2
1	115	2	5	-3
1	116	6	6	0
1	117	3	2	1
1	118	5	5	0
1	119	8	4	4
1	120	7	7	0
1	121	2	2	0
1	122	11	11	0
1	123	0	2	-2
1	124	6	5	1
1	125	7	7	0
1	126	8	7	1
1	127	6	3	3
1	128	4	2	2
1	129	6	10	-4
1	130	9	7	2
1	131	6	5	1
1	132	8	3	5
1	133	5	2	3
1	134	6	9	-3
1	135	7	8	-1
1	136	5	9	-4
1	137	3	1	2
1	138	7	5	2
1	139	2	4	-2
1	140	10	6	4
1	141	3	5	-2
1	142	4	3	1
1	143	4	2	2
1	144	7	10	-3
1	145	3	4	-1
1	146	6	5	1
1	147	5	9	-4
1	148	2	4	-2
1	149	5	2	3
1	150	2	5	-3
1	151	7	9	-2
1	152	6	4	2
1	153	5	7	-2
1	154	7	3	4
1	155	2	3	-1
1	156	1	2	-1
2	1	5	3	2
2	2	0	5	-5
2	3	4	7	-3
2	4	3	4	-1
2	5	6	6	0
2	6	6	9	-3
2	7	4	5	-1
2	8	5	1	4
2	9	2	6	-4
2	10	5	4	1
2	11	5	7	-2
2	12	2	9	-7
2	13	7	11	-4
2	14	4	1	3
2	15	6	4	2
2	16	3	4	-1
2	17	4	2	2
2	18	3	3	0
2	19	2	2	0
2	20	2	2	0
2	21	11	5	6
2	22	5	10	-5
2	23	8	6	2
2	24	10	6	4
2	25	4	9	-5
2	26	4	7	-3
2	27	6	8	-2
2	28	6	7	-1
2	29	0	3	-3
2	30	3	6	-3
2	31	6	3	3
2	32	3	4	-1
2	33	7	9	-2
2	34	6	5	1
2	35	1	6	-5
2	36	3	6	-3
2	37	4	7	-3
2	38	2	4	-2
2	39	2	5	-3
2	40	3	5	-2
2	41	5	9	-4
2	42	7	11	-4
2	43	3	1	2
2	44	4	6	-2
2	45	3	3	0
2	46	3	11	-8
2	47	6	12	-6
2	48	6	4	2
2	49	6	2	4
2	50	7	3	4
2	51	2	7	-5
2	52	5	2	3
2	53	6	12	-6
2	54	3	4	-1
2	55	5	3	2
2	56	5	8	-3
2	57	2	6	-4
2	58	11	3	8
2	59	3	2	1
2	60	5	2	3
2	61	2	4	-2
2	62	3	3	0
2	63	4	0	4
2	64	4	1	3
2	65	0	1	-1
2	66	5	4	1
2	67	2	7	-5
2	68	1	1	0
2	69	1	1	0
2	70	4	10	-6
2	71	3	2	1
2	72	5	9	-4
2	73	4	5	-1
2	74	4	6	-2
2	75	7	0	7
2	76	0	1	-1
2	77	4	5	-1
2	78	4	3	1
2	79	2	6	-4
2	80	10	4	6
2	81	3	5	-2
2	82	2	3	-1
2	83	5	4	1
2	84	0	5	-5
2	85	9	4	5
2	86	4	8	-4
2	87	2	1	1
2	88	8	4	4
2	89	3	2	1
2	90	2	7	-5
2	91	7	5	2
2	92	0	0	0
2	93	2	2	0
2	94	1	1	0
2	95	1	2	-1
2	96	1	1	0
2	97	0	0	0
2	98	7	3	4
2	99	1	5	-4
2	100	2	1	1
2	101	0	3	-3
2	102	4	5	-1
2	103	7	4	3
2	104	4	4	0
2	105	5	5	0
2	106	2	5	-3
2	107	3	3	0
2	108	5	5	0
2	109	4	8	-4
2	110	3	2	1
2	111	5	2	3
2	112	5	4	1
2	113	7	11	-4
2	114	5	7	-2
2	115	5	3	2
2	116	8	9	-1
2	117	7	5	2
2	118	2	4	-2
2	119	4	5	-1
2	120	2	3	-1
2	121	4	10	-6
2	122	3	1	2
2	123	3	3	0
2	124	3	5	-2
2	125	2	9	-7
2	126	1	4	-3
2	127	6	5	1
2	128	2	2	0
2	129	4	2	2
2	130	5	6	-1
2	131	4	11	-7
2	132	4	4	0
2	133	3	1	2
2	134	4	2	2
2	135	4	0	4
2	136	2	3	-1
2	137	4	5	-1
2	138	3	0	3
2	139	4	7	-3
2	140	4	3	1
2	141	5	3	2
2	142	8	4	4
2	143	4	2	2
2	144	3	4	-1
2	145	12	2	10
2	146	9	6	3
2	147	1	1	0
3	1	3	3	0
3	2	2	4	-2
3	3	6	0	6
3	4	3	6	-3
3	5	5	3	2
3	6	7	8	-1
3	7	5	6	-1
3	8	2	5	-3
3	9	6	8	-2
3	10	3	8	-5
3	11	5	6	-1
3	12	6	7	-1
3	13	3	6	-3
3	14	6	5	1
3	15	4	3	1
3	16	4	3	1
3	17	4	4	0
3	18	6	6	0
3	19	6	4	2
3	20	0	5	-5
3	21	5	2	3
3	22	1	4	-3
3	23	4	1	3
3	24	9	8	1
3	25	4	5	-1
3	26	3	4	-1
3	27	6	7	-1
3	28	3	6	-3
3	29	3	5	-2
3	30	4	2	2
3	31	2	5	-3
3	32	2	4	-2
3	33	9	7	2
3	34	4	10	-6
3	35	4	5	-1
3	36	2	2	0
3	37	3	3	0
3	38	4	3	1
3	39	3	3	0
3	40	1	10	-9
3	41	2	5	-3
3	42	3	3	0
3	43	2	3	-1
3	44	1	5	-4
3	45	6	2	4
3	46	6	6	0
3	47	1	0	1
3	48	1	3	-2
3	49	3	3	0
3	50	8	3	5
3	51	6	7	-1
3	52	7	8	-1
3	53	4	8	-4
3	54	4	5	-1
3	55	4	3	1
3	56	5	4	1
3	57	3	4	-1
3	58	3	2	1
3	59	1	6	-5
3	60	3	1	2
3	61	2	2	0
3	62	4	6	-2
3	63	6	6	0
3	64	6	5	1
3	65	1	7	-6
3	66	4	3	1
3	67	6	2	4
3	68	4	4	0
3	69	5	2	3
3	70	3	4	-1
3	71	2	1	1
3	72	7	4	3
3	73	1	10	-9
3	74	5	3	2
3	75	4	3	1
3	76	3	8	-5
3	77	2	3	-1
3	78	2	4	-2
3	79	3	8	-5
3	80	1	6	-5
3	81	5	5	0
3	82	6	4	2
3	83	3	2	1
3	84	3	4	-1
3	85	3	5	-2
3	86	8	4	4
3	87	3	7	-4
3	88	4	2	2
3	89	4	6	-2
3	90	3	10	-7
3	91	7	4	3
3	92	1	0	1
3	93	4	4	0
3	94	4	3	1
3	95	2	6	-4
3	96	0	0	0
3	97	1	2	-1
3	98	3	2	1
3	99	1	6	-5
3	100	1	1	0
3	101	1	2	-1
3	102	1	2	-1
3	103	2	3	-1
3	104	1	1	0
3	105	3	1	2
3	106	3	4	-1
3	107	5	6	-1
3	108	4	4	0
3	109	3	5	-2
3	110	4	3	1
3	111	6	4	2
3	112	8	3	5
3	113	3	5	-2
3	114	6	9	-3
3	115	3	5	-2
3	116	6	4	2
3	117	7	3	4
3	118	5	6	-1
3	119	3	4	-1
3	120	5	3	2
3	121	4	4	0
3	122	3	2	1
3	123	5	6	-1
3	124	0	1	-1
3	125	1	1	0
3	126	7	6	1
3	127	3	3	0
3	128	9	6	3
3	129	4	2	2
3	130	2	2	0
3	131	3	6	-3
3	132	4	4	0
3	133	3	3	0
3	134	6	3	3
3	135	6	8	-2
3	136	2	4	-2
3	137	5	3	2
3	138	4	7	-3
3	139	3	6	-3
3	140	5	2	3
3	141	0	2	-2
3	142	8	8	0
3	143	6	3	3
3	144	3	5	-2
3	145	3	1	2
3	146	5	2	3
3	147	4	3	1
4	1	1	7	-6
4	2	8	5	3
4	3	3	4	-1
4	4	1	2	-1
4	5	5	10	-5
4	6	5	4	1
4	7	6	7	-1
4	8	0	5	-5
4	9	8	7	1
4	10	6	3	3
4	11	3	9	-6
4	12	8	6	2
4	13	4	0	4
4	14	6	4	2
4	15	3	5	-2
4	16	12	0	12
4	17	5	6	-1
4	18	6	5	1
4	19	2	2	0
4	20	1	0	1
4	21	3	4	-1
4	22	3	2	1
4	23	5	1	4
4	24	4	2	2
4	25	3	5	-2
4	26	4	5	-1
4	27	4	2	2
4	28	7	6	1
4	29	2	8	-6
4	30	6	9	-3
4	31	4	2	2
4	32	5	2	3
4	33	2	2	0
4	34	4	5	-1
4	35	5	3	2
4	36	4	7	-3
4	37	2	7	-5
4	38	4	4	0
4	39	6	3	3
4	40	5	4	1
4	41	6	7	-1
4	42	1	6	-5
4	43	3	6	-3
4	44	7	4	3
4	45	2	1	1
4	46	5	6	-1
4	47	2	0	2
4	48	7	8	-1
4	49	4	1	3
4	50	4	3	1
4	51	2	2	0
4	52	5	3	2
4	53	3	3	0
4	54	5	2	3
4	55	5	4	1
4	56	4	3	1
4	57	4	5	-1
4	58	7	6	1
4	59	3	3	0
4	60	2	2	0
4	61	6	4	2
4	62	4	4	0
4	63	4	2	2
4	64	3	3	0
4	65	4	3	1
4	66	1	4	-3
4	67	4	1	3
4	68	5	3	2
4	69	4	5	-1
4	70	6	2	4
4	71	3	5	-2
4	72	3	3	0
4	73	2	9	-7
4	74	5	6	-1
4	75	7	2	5
4	76	2	5	-3
4	77	0	1	-1
4	78	1	3	-2
4	79	1	1	0
4	80	2	3	-1
4	81	6	2	4
4	82	2	3	-1
4	83	0	0	0
4	84	3	6	-3
4	85	6	1	5
4	86	2	2	0
4	87	1	11	-10
4	88	10	3	7
4	89	1	3	-2
4	90	2	3	-1
4	91	2	4	-2
4	92	0	4	-4
4	93	4	7	-3
4	94	0	0	0
4	95	2	2	0
4	96	3	1	2
4	97	4	1	3
4	98	2	5	-3
4	99	0	1	-1
4	100	5	3	2
4	101	1	1	0
4	102	4	3	1
4	103	4	3	1
4	104	2	2	0
4	105	4	6	-2
4	106	4	6	-2
4	107	3	1	2
4	108	5	4	1
4	109	2	1	1
4	110	5	5	0
4	111	6	5	1
4	112	3	5	-2
4	113	6	3	3
4	114	4	1	3
4	115	4	6	-2
4	116	4	3	1
4	117	5	11	-6
4	118	4	9	-5
4	119	4	3	1
4	120	2	4	-2
4	121	6	5	1
4	122	2	2	0
4	123	4	8	-4
4	124	2	3	-1
4	125	3	3	0
4	126	5	7	-2
4	127	6	5	1
4	128	3	1	2
4	129	4	5	-1
4	130	4	7	-3
4	131	3	5	-2
4	132	3	5	-2
4	133	3	6	-3
4	134	4	6	-2
4	135	3	0	3
4	136	3	7	-4
4	137	2	2	0
4	138	1	3	-2
4	139	5	4	1
4	140	3	5	-2
4	141	7	3	4
4	142	6	4	2
4	143	1	1	0
4	144	4	0	4
4	145	7	3	4
4	146	4	4	0
4	147	2	3	-1
4	148	3	4	-1
4	149	3	6	-3
5	1	2	4	-2
5	2	7	2	5
5	3	2	9	-7
5	4	1	5	-4
5	5	1	3	-2
5	6	8	8	0
5	7	4	3	1
5	8	5	6	-1
5	9	4	9	-5
5	10	3	6	-3
5	11	8	10	-2
5	12	8	11	-3
5	13	2	4	-2
5	14	1	5	-4
5	15	4	2	2
5	16	17	0	17
5	17	6	9	-3
5	18	3	1	2
5	19	2	7	-5
5	20	1	2	-1
5	21	5	2	3
5	22	8	5	3
5	23	4	4	0
5	24	6	7	-1
5	25	6	6	0
5	26	3	2	1
5	27	2	6	-4
5	28	11	6	5
5	29	4	7	-3
5	30	3	3	0
5	31	3	6	-3
5	32	8	5	3
5	33	5	3	2
5	34	2	2	0
5	35	2	4	-2
5	36	2	2	0
5	37	2	5	-3
5	38	6	4	2
5	39	4	4	0
5	40	9	4	5
5	41	2	2	0
5	42	2	14	-12
5	43	3	7	-4
5	44	4	2	2
5	45	4	6	-2
5	46	1	0	1
5	47	5	2	3
5	48	6	8	-2
5	49	5	3	2
5	50	0	5	-5
5	51	6	6	0
5	52	3	1	2
5	53	4	3	1
5	54	5	3	2
5	55	1	10	-9
5	56	6	7	-1
5	57	5	7	-2
5	58	4	6	-2
5	59	1	1	0
5	60	0	4	-4
5	61	1	1	0
5	62	2	3	-1
5	63	5	3	2
5	64	6	4	2
5	65	0	4	-4
5	66	0	0	0
5	67	6	3	3
5	68	0	0	0
5	69	6	2	4
5	70	3	2	1
5	71	5	7	-2
5	72	2	4	-2
5	73	5	2	3
5	74	7	6	1
5	75	1	3	-2
5	76	0	3	-3
5	77	6	3	3
5	78	2	6	-4
5	79	2	3	-1
5	80	3	5	-2
5	81	3	4	-1
5	82	2	5	-3
5	83	5	5	0
5	84	4	2	2
5	85	0	0	0
5	86	0	3	-3
5	87	5	1	4
5	88	1	4	-3
5	89	2	4	-2
5	90	7	4	3
5	91	2	5	-3
5	92	5	2	3
5	93	6	4	2
5	94	3	6	-3
5	95	1	9	-8
5	96	2	4	-2
5	97	3	1	2
5	98	0	1	-1
5	99	3	5	-2
5	100	1	0	1
5	101	2	3	-1
5	102	4	0	4
5	103	1	2	-1
5	104	2	4	-2
5	105	4	7	-3
5	106	6	3	3
5	107	3	6	-3
5	108	2	2	0
5	109	4	5	-1
5	110	2	1	1
5	111	5	2	3
5	112	6	2	4
5	113	5	6	-1
5	114	2	2	0
5	115	3	2	1
5	116	2	3	-1
5	117	5	6	-1
5	118	5	4	1
5	119	8	6	2
5	120	6	7	-1
5	121	2	5	-3
5	122	1	2	-1
5	123	4	6	-2
5	124	2	2	0
5	125	7	7	0
5	126	3	5	-2
5	127	0	0	0
5	128	8	10	-2
5	129	7	5	2
5	130	4	6	-2
5	131	6	6	0
5	132	5	6	-1
5	133	2	2	0
5	134	4	3	1
5	135	3	4	-1
5	136	6	6	0
5	137	4	3	1
5	138	3	1	2
5	139	1	0	1
5	140	1	10	-9
5	141	4	4	0
5	142	4	5	-1
5	143	1	2	-1
5	144	0	2	-2
5	145	5	5	0
5	146	10	6	4
5	147	6	9	-3
5	148	2	1	1
5	149	5	4	1
5	150	4	1	3
5	151	2	6	-4
5	152	4	3	1
5	153	5	8	-3
5	154	7	4	3
5	155	5	2	3
5	156	8	1	7
5	157	3	5	-2
5	158	2	1	1
5	159	4	4	0
5	160	7	1	6
5	161	9	7	2
5	162	0	2	-2
5	163	4	2	2
6	1	1	7	-6
6	2	4	10	-6
6	3	1	4	-3
6	4	4	5	-1
6	5	3	1	2
6	6	2	3	-1
6	7	1	8	-7
6	8	8	11	-3
6	9	5	5	0
6	10	3	6	-3
6	11	3	4	-1
6	12	0	2	-2
6	13	2	2	0
6	14	2	2	0
6	15	9	5	4
6	16	4	3	1
6	17	2	6	-4
6	18	5	4	1
6	19	3	9	-6
6	20	2	2	0
6	21	3	3	0
6	22	5	4	1
6	23	4	5	-1
6	24	2	8	-6
6	25	3	3	0
6	26	9	9	0
6	27	8	7	1
6	28	2	8	-6
6	29	1	7	-6
6	30	5	7	-2
6	31	1	2	-1
6	32	5	3	2
6	33	3	5	-2
6	34	4	2	2
6	35	3	0	3
6	36	5	7	-2
6	37	6	5	1
6	38	7	8	-1
6	39	4	5	-1
6	40	3	5	-2
6	41	8	8	0
6	42	3	5	-2
6	43	6	3	3
6	44	3	5	-2
6	45	5	5	0
6	46	4	3	1
6	47	6	8	-2
6	48	5	8	-3
6	49	6	6	0
6	50	3	4	-1
6	51	1	5	-4
6	52	3	3	0
6	53	2	2	0
6	54	1	6	-5
6	55	3	1	2
6	56	4	10	-6
6	57	4	2	2
6	58	5	8	-3
6	59	1	3	-2
6	60	5	5	0
6	61	4	5	-1
6	62	3	5	-2
6	63	4	7	-3
6	64	5	5	0
6	65	3	9	-6
6	66	3	4	-1
6	67	4	5	-1
6	68	3	2	1
6	69	5	2	3
6	70	3	4	-1
6	71	0	0	0
6	72	2	1	1
6	73	4	10	-6
6	74	5	7	-2
6	75	1	8	-7
6	76	3	1	2
6	77	8	4	4
6	78	2	3	-1
6	79	1	2	-1
6	80	2	5	-3
6	81	5	4	1
6	82	1	11	-10
6	83	1	5	-4
6	84	7	6	1
6	85	3	5	-2
6	86	3	7	-4
6	87	4	5	-1
6	88	2	2	0
6	89	3	5	-2
6	90	1	7	-6
6	91	1	5	-4
6	92	3	3	0
6	93	7	7	0
6	94	6	6	0
6	95	2	0	2
6	96	3	4	-1
6	97	3	3	0
6	98	0	1	-1
6	99	5	10	-5
6	100	6	5	1
6	101	4	7	-3
6	102	5	6	-1
6	103	4	5	-1
6	104	3	5	-2
6	105	4	7	-3
6	106	1	3	-2
6	107	1	3	-2
6	108	5	6	-1
6	109	7	6	1
6	110	2	4	-2
6	111	4	3	1
6	112	1	5	-4
6	113	3	2	1
6	114	5	5	0
6	115	4	2	2
6	116	9	5	4
6	117	1	5	-4
6	118	7	6	1
6	119	3	3	0
6	120	6	11	-5
6	121	3	9	-6
6	122	5	1	4
6	123	2	5	-3
6	124	3	4	-1
6	125	4	8	-4
6	126	6	4	2
6	127	3	12	-9
6	128	2	3	-1
6	129	5	6	-1
6	130	2	1	1
6	131	5	6	-1
6	132	5	6	-1
6	133	3	0	3
6	134	3	5	-2
6	135	2	4	-2
6	136	7	3	4
6	137	4	5	-1
6	138	3	3	0
6	139	1	3	-2
6	140	2	3	-1
6	141	5	4	1
6	142	1	3	-2
6	143	6	5	1
6	144	7	6	1
6	145	4	6	-2
6	146	1	3	-2
6	147	2	1	1
6	148	3	5	-2
6	149	1	2	-1
6	150	4	8	-4
6	151	3	5	-2
6	152	6	5	1
7	1	3	6	-3
7	2	3	9	-6
7	3	4	7	-3
7	4	4	5	-1
7	5	1	1	0
7	6	3	4	-1
7	7	6	2	4
7	8	3	5	-2
7	9	2	4	-2
7	10	4	4	0
7	11	2	1	1
7	12	5	4	1
7	13	1	2	-1
7	14	7	4	3
7	15	1	4	-3
7	16	6	2	4
7	17	4	4	0
7	18	2	4	-2
7	19	3	2	1
7	20	3	2	1
7	21	2	7	-5
7	22	1	4	-3
7	23	1	2	-1
7	24	2	2	0
7	25	1	3	-2
7	26	4	3	1
7	27	3	6	-3
7	28	7	1	6
7	29	3	2	1
7	30	2	5	-3
7	31	2	2	0
7	32	1	10	-9
7	33	3	3	0
7	34	3	2	1
7	35	0	1	-1
7	36	4	4	0
7	37	5	3	2
7	38	2	2	0
7	39	2	2	0
7	40	2	2	0
7	41	3	5	-2
7	42	4	7	-3
7	43	2	6	-4
7	44	5	6	-1
7	45	3	2	1
7	46	4	3	1
7	47	2	5	-3
7	48	1	3	-2
7	49	2	6	-4
7	50	5	5	0
7	51	6	2	4
7	52	1	3	-2
7	53	4	7	-3
7	54	1	6	-5
7	55	4	6	-2
7	56	2	2	0
7	57	2	0	2
7	58	1	6	-5
7	59	1	2	-1
7	60	6	5	1
7	61	5	3	2
7	62	1	3	-2
7	63	6	6	0
7	64	4	1	3
7	65	5	4	1
7	66	1	2	-1
7	67	3	1	2
7	68	2	1	1
7	69	5	2	3
7	70	3	2	1
7	71	1	1	0
7	72	2	2	0
7	73	8	7	1
7	74	0	0	0
7	75	2	5	-3
7	76	1	0	1
7	77	4	2	2
7	78	2	4	-2
7	79	2	4	-2
7	80	3	3	0
7	81	0	8	-8
7	82	4	3	1
7	83	4	4	0
7	84	4	3	1
7	85	3	5	-2
7	86	1	3	-2
7	87	3	2	1
7	88	0	5	-5
7	89	5	5	0
7	90	5	4	1
7	91	0	4	-4
7	92	1	1	0
7	93	5	3	2
7	94	2	8	-6
7	95	7	5	2
7	96	0	2	-2
7	97	0	0	0
7	98	3	4	-1
7	99	2	3	-1
7	100	2	1	1
7	101	5	6	-1
7	102	2	7	-5
7	103	1	3	-2
7	104	2	1	1
7	105	2	2	0
7	106	0	0	0
7	107	3	4	-1
7	108	3	6	-3
7	109	2	2	0
7	110	3	3	0
7	111	0	1	-1
7	112	4	5	-1
7	113	1	4	-3
7	114	1	3	-2
7	115	1	4	-3
7	116	1	5	-4
7	117	3	3	0
7	118	4	3	1
7	119	2	2	0
7	120	2	4	-2
7	121	5	5	0
7	122	4	2	2
7	123	5	3	2
7	124	4	6	-2
7	125	8	6	2
7	126	0	2	-2
7	127	3	4	-1
7	128	2	1	1
7	129	4	5	-1
7	130	1	4	-3
7	131	4	0	4
7	132	2	4	-2
7	133	2	4	-2
7	134	1	2	-1
7	135	3	2	1
7	136	0	2	-2
7	137	5	6	-1
7	138	4	2	2
7	139	3	6	-3
7	140	1	4	-3
7	141	1	1	0
7	142	1	4	-3
7	143	4	2	2
7	144	4	4	0
7	145	3	4	-1
7	146	1	3	-2
7	147	2	3	-1
7	148	4	4	0
7	149	0	2	-2
7	150	4	1	3
7	151	2	4	-2
7	152	5	4	1
7	153	4	5	-1
7	154	1	4	-3
7	155	4	5	-1
7	156	4	5	-1
7	157	2	5	-3
8	1	1	3	-2
8	2	2	6	-4
8	3	4	4	0
8	4	2	6	-4
8	5	6	8	-2
8	6	7	6	1
8	7	2	2	0
8	8	5	4	1
8	9	3	6	-3
8	10	7	9	-2
8	11	1	5	-4
8	12	4	4	0
8	13	1	4	-3
8	14	3	3	0
8	15	2	1	1
8	16	1	3	-2
8	17	2	3	-1
8	18	2	5	-3
8	19	2	5	-3
8	20	2	5	-3
8	21	4	4	0
8	22	2	1	1
8	23	1	1	0
8	24	3	4	-1
8	25	1	4	-3
8	26	1	4	-3
8	27	3	0	3
8	28	1	4	-3
8	29	0	5	-5
8	30	5	4	1
8	31	3	2	1
8	32	5	5	0
8	33	6	2	4
8	34	4	3	1
8	35	10	4	6
8	36	5	4	1
8	37	2	4	-2
8	38	5	1	4
8	39	4	3	1
8	40	3	4	-1
8	41	3	5	-2
8	42	0	7	-7
8	43	2	5	-3
8	44	6	3	3
8	45	2	2	0
8	46	3	5	-2
8	47	9	5	4
8	48	2	4	-2
8	49	5	6	-1
8	50	3	3	0
8	51	1	3	-2
8	52	1	0	1
8	53	3	3	0
8	54	1	5	-4
8	55	2	0	2
8	56	2	3	-1
8	57	0	1	-1
8	58	3	4	-1
8	59	2	3	-1
8	60	3	6	-3
8	61	3	3	0
8	62	3	4	-1
8	63	1	2	-1
8	64	1	2	-1
8	65	4	2	2
8	66	1	2	-1
8	67	2	2	0
8	68	2	9	-7
8	69	4	2	2
8	70	1	1	0
8	71	2	3	-1
8	72	1	5	-4
8	73	3	3	0
8	74	3	5	-2
8	75	6	5	1
8	76	3	10	-7
8	77	3	8	-5
8	78	2	6	-4
8	79	2	2	0
8	80	0	4	-4
8	81	3	9	-6
8	82	5	6	-1
8	83	5	5	0
8	84	1	5	-4
8	85	4	5	-1
8	86	0	3	-3
8	87	0	4	-4
8	88	2	4	-2
8	89	8	3	5
8	90	4	4	0
8	91	0	3	-3
8	92	2	0	2
8	93	0	0	0
8	94	1	3	-2
8	95	1	2	-1
8	96	3	3	0
8	97	1	7	-6
8	98	2	2	0
8	99	2	4	-2
8	100	3	1	2
8	101	3	4	-1
8	102	1	2	-1
8	103	1	0	1
8	104	3	4	-1
8	105	6	4	2
8	106	1	3	-2
8	107	6	6	0
8	108	1	1	0
8	109	5	2	3
8	110	4	6	-2
8	111	4	4	0
8	112	3	7	-4
8	113	5	7	-2
8	114	5	2	3
8	115	4	4	0
8	116	3	4	-1
8	117	4	2	2
8	118	7	6	1
8	119	2	2	0
8	120	3	4	-1
8	121	4	5	-1
8	122	5	2	3
8	123	3	8	-5
8	124	0	3	-3
8	125	6	5	1
8	126	5	2	3
8	127	3	3	0
8	128	3	3	0
8	129	5	2	3
8	130	1	0	1
8	131	4	5	-1
8	132	1	0	1
8	133	2	2	0
8	134	1	5	-4
8	135	1	3	-2
8	136	4	1	3
8	137	4	5	-1
8	138	3	3	0
8	139	4	2	2
8	140	2	4	-2
8	141	5	4	1
8	142	2	4	-2
8	143	6	4	2
8	144	1	3	-2
8	145	4	2	2
8	146	3	2	1
8	147	3	7	-4
8	148	3	3	0
8	149	1	2	-1
8	150	4	6	-2
8	151	1	2	-1
8	152	3	1	2
9	1	0	5	-5
9	2	7	4	3
9	3	4	6	-2
9	4	2	4	-2
9	5	2	2	0
9	6	11	9	2
9	7	3	4	-1
9	8	7	6	1
9	9	7	5	2
9	10	3	4	-1
9	11	1	1	0
9	12	6	5	1
9	13	1	5	-4
9	14	3	5	-2
9	15	5	4	1
9	16	5	4	1
9	17	2	2	0
9	18	5	5	0
9	19	5	3	2
9	20	6	9	-3
9	21	3	0	3
9	22	4	2	2
9	23	5	3	2
9	24	1	3	-2
9	25	6	4	2
9	26	3	3	0
9	27	4	4	0
9	28	4	4	0
9	29	4	4	0
9	30	3	6	-3
9	31	5	6	-1
9	32	1	11	-10
9	33	4	3	1
9	34	2	4	-2
9	35	4	3	1
9	36	4	6	-2
9	37	3	2	1
9	38	0	3	-3
9	39	3	6	-3
9	40	2	0	2
9	41	3	2	1
9	42	4	4	0
9	43	5	5	0
9	44	5	4	1
9	45	5	7	-2
9	46	2	2	0
9	47	6	6	0
9	48	5	7	-2
9	49	8	5	3
9	50	0	0	0
9	51	5	1	4
9	52	1	1	0
9	53	2	4	-2
9	54	2	5	-3
9	55	5	0	5
9	56	1	3	-2
9	57	4	1	3
9	58	3	2	1
9	59	0	4	-4
9	60	0	1	-1
9	61	1	0	1
9	62	5	7	-2
9	63	3	8	-5
9	64	1	1	0
9	65	4	2	2
9	66	0	0	0
9	67	0	1	-1
9	68	6	3	3
9	69	2	2	0
9	70	3	2	1
9	71	6	3	3
9	72	4	0	4
9	73	1	4	-3
9	74	5	1	4
9	75	3	3	0
9	76	3	2	1
9	77	5	3	2
9	78	1	1	0
9	79	3	5	-2
9	80	7	4	3
9	81	2	3	-1
9	82	1	7	-6
9	83	3	7	-4
9	84	4	3	1
9	85	2	4	-2
9	86	8	1	7
9	87	6	11	-5
9	88	5	6	-1
9	89	5	3	2
9	90	0	4	-4
9	91	1	2	-1
9	92	3	4	-1
9	93	1	1	0
9	94	2	5	-3
9	95	5	5	0
9	96	4	6	-2
9	97	0	0	0
9	98	3	4	-1
9	99	1	0	1
9	100	5	3	2
9	101	1	2	-1
9	102	1	3	-2
9	103	0	2	-2
9	104	2	3	-1
9	105	5	3	2
9	106	6	7	-1
9	107	1	2	-1
9	108	4	5	-1
9	109	1	5	-4
9	110	5	3	2
9	111	2	2	0
9	112	3	6	-3
9	113	7	6	1
9	114	4	4	0
9	115	4	5	-1
9	116	4	5	-1
9	117	4	4	0
9	118	8	4	4
9	119	6	12	-6
9	120	3	4	-1
9	121	9	3	6
9	122	2	3	-1
9	123	3	3	0
9	124	4	5	-1
9	125	2	4	-2
9	126	5	2	3
9	127	5	2	3
9	128	5	7	-2
9	129	2	6	-4
9	130	5	6	-1
9	131	2	5	-3
9	132	2	3	-1
9	133	4	2	2
9	134	6	4	2
9	135	1	1	0
9	136	4	4	0
9	137	1	3	-2
9	138	4	2	2
9	139	4	5	-1
9	140	2	2	0
9	141	7	3	4
9	142	3	6	-3
9	143	1	4	-3
9	144	3	4	-1
9	145	6	6	0
9	146	5	4	1
9	147	6	5	1
9	148	2	4	-2
9	149	7	3	4
9	150	2	5	-3
9	151	3	3	0
9	152	2	3	-1
9	153	2	5	-3
9	154	4	3	1
9	155	2	5	-3
9	156	4	2	2
10	1	2	6	-4
10	2	2	7	-5
10	3	4	7	-3
10	4	2	10	-8
10	5	1	3	-2
10	6	4	5	-1
10	7	3	7	-4
10	8	2	1	1
10	9	13	4	9
10	10	1	8	-7
10	11	3	6	-3
10	12	6	4	2
10	13	5	3	2
10	14	5	4	1
10	15	3	3	0
10	16	5	7	-2
10	17	6	6	0
10	18	3	3	0
10	19	2	5	-3
10	20	1	3	-2
10	21	10	5	5
10	22	3	6	-3
10	23	2	1	1
10	24	1	2	-1
10	25	0	3	-3
10	26	8	6	2
10	27	4	4	0
10	28	6	6	0
10	29	3	4	-1
10	30	5	8	-3
10	31	3	1	2
10	32	3	5	-2
10	33	4	8	-4
10	34	5	6	-1
10	35	4	7	-3
10	36	8	3	5
10	37	5	2	3
10	38	5	6	-1
10	39	5	4	1
10	40	6	3	3
10	41	9	6	3
10	42	3	6	-3
10	43	3	4	-1
10	44	2	3	-1
10	45	6	3	3
10	46	9	11	-2
10	47	5	6	-1
10	48	8	5	3
10	49	4	6	-2
10	50	3	3	0
10	51	1	5	-4
10	52	2	0	2
10	53	11	5	6
10	54	6	7	-1
10	55	3	6	-3
10	56	1	1	0
10	57	6	6	0
10	58	5	5	0
10	59	1	2	-1
10	60	3	5	-2
10	61	1	3	-2
10	62	5	8	-3
10	63	5	3	2
10	64	1	0	1
10	65	4	8	-4
10	66	3	3	0
10	67	6	3	3
10	68	2	2	0
10	69	3	2	1
10	70	0	0	0
10	71	4	3	1
10	72	5	4	1
10	73	2	4	-2
10	74	2	2	0
10	75	1	5	-4
10	76	6	4	2
10	77	1	2	-1
10	78	5	4	1
10	79	5	3	2
10	80	9	9	0
10	81	6	4	2
10	82	2	5	-3
10	83	1	0	1
10	84	3	8	-5
10	85	2	3	-1
10	86	4	5	-1
10	87	1	3	-2
10	88	1	1	0
10	89	3	4	-1
10	90	6	5	1
10	91	4	6	-2
10	92	9	3	6
10	93	4	6	-2
10	94	5	4	1
10	95	1	1	0
10	96	5	5	0
10	97	3	5	-2
10	98	4	5	-1
10	99	5	4	1
10	100	3	8	-5
10	101	4	6	-2
10	102	2	3	-1
10	103	5	3	2
10	104	6	6	0
10	105	4	3	1
10	106	6	5	1
10	107	2	4	-2
10	108	7	7	0
10	109	6	7	-1
10	110	6	7	-1
10	111	3	9	-6
10	112	8	5	3
10	113	3	4	-1
10	114	5	3	2
10	115	5	6	-1
10	116	8	7	1
10	117	2	3	-1
10	118	4	3	1
10	119	6	1	5
10	120	2	9	-7
10	121	4	5	-1
10	122	1	2	-1
10	123	4	9	-5
10	124	6	3	3
10	125	5	2	3
10	126	6	4	2
10	127	4	3	1
10	128	5	2	3
10	129	4	2	2
10	130	4	8	-4
10	131	5	4	1
10	132	6	2	4
10	133	3	3	0
10	134	5	9	-4
11	1	6	3	3
11	2	4	1	3
11	3	3	4	-1
11	4	0	2	-2
11	5	1	3	-2
11	6	4	3	1
11	7	3	5	-2
11	8	4	9	-5
11	9	4	8	-4
11	10	5	11	-6
11	11	5	6	-1
11	12	2	1	1
11	13	4	4	0
11	14	6	3	3
11	15	4	5	-1
11	16	2	4	-2
11	17	0	0	0
11	18	10	11	-1
11	19	1	0	1
11	20	1	7	-6
11	21	7	3	4
11	22	2	2	0
11	23	3	3	0
11	24	1	8	-7
11	25	7	5	2
11	26	1	4	-3
11	27	3	3	0
11	28	4	7	-3
11	29	4	3	1
11	30	3	3	0
11	31	4	5	-1
11	32	5	5	0
11	33	8	3	5
11	34	2	1	1
11	35	1	3	-2
11	36	5	4	1
11	37	4	6	-2
11	38	2	4	-2
11	39	4	3	1
11	40	4	6	-2
11	41	3	2	1
11	42	9	7	2
11	43	2	5	-3
11	44	7	4	3
11	45	3	7	-4
11	46	4	3	1
11	47	5	4	1
11	48	3	6	-3
11	49	2	0	2
11	50	4	2	2
11	51	2	4	-2
11	52	7	6	1
11	53	3	5	-2
11	54	1	3	-2
11	55	2	3	-1
11	56	2	1	1
11	57	1	2	-1
11	58	6	3	3
11	59	3	1	2
11	60	2	3	-1
11	61	5	8	-3
11	62	7	0	7
11	63	3	3	0
11	64	1	0	1
11	65	6	6	0
11	66	2	0	2
11	67	7	4	3
11	68	2	5	-3
11	69	5	2	3
11	70	2	3	-1
11	71	4	4	0
11	72	3	7	-4
11	73	1	2	-1
11	74	1	1	0
11	75	4	7	-3
11	76	5	6	-1
11	77	3	2	1
11	78	6	3	3
11	79	3	3	0
11	80	1	0	1
11	81	8	5	3
11	82	2	4	-2
11	83	0	2	-2
11	84	2	4	-2
11	85	4	3	1
11	86	2	5	-3
11	87	1	1	0
11	88	4	8	-4
11	89	5	4	1
11	90	2	4	-2
11	91	5	3	2
11	92	1	1	0
11	93	8	5	3
11	94	0	0	0
11	95	2	1	1
11	96	2	4	-2
11	97	1	0	1
11	98	2	1	1
11	99	2	5	-3
11	100	2	3	-1
11	101	2	6	-4
11	102	6	9	-3
11	103	0	0	0
11	104	4	9	-5
11	105	5	2	3
11	106	2	1	1
11	107	3	2	1
11	108	0	3	-3
11	109	1	3	-2
11	110	3	4	-1
11	111	2	1	1
11	112	0	0	0
11	113	1	2	-1
11	114	1	5	-4
11	115	3	3	0
11	116	1	1	0
11	117	2	0	2
11	118	1	2	-1
11	119	3	1	2
11	120	3	4	-1
11	121	2	3	-1
11	122	2	1	1
11	123	2	3	-1
11	124	1	3	-2
11	125	2	7	-5
11	126	5	5	0
11	127	4	4	0
11	128	2	2	0
11	129	4	4	0
11	130	2	7	-5
11	131	3	2	1
11	132	5	5	0
11	133	3	0	3
11	134	5	8	-3
11	135	2	3	-1
11	136	3	3	0
11	137	4	6	-2
11	138	3	4	-1
11	139	3	6	-3
11	140	6	4	2
11	141	5	5	0
11	142	3	3	0
11	143	4	4	0
11	144	3	2	1
11	145	4	3	1
11	146	2	1	1
11	147	4	4	0
11	148	7	9	-2
11	149	6	7	-1
11	150	2	5	-3
11	151	1	3	-2
11	152	0	3	-3
11	153	2	2	0
11	154	4	3	1
11	155	6	4	2
11	156	1	3	-2
11	157	3	2	1
11	158	4	5	-1
11	159	3	6	-3
11	160	1	0	1
11	161	7	3	4
11	162	5	10	-5
11	163	3	7	-4
11	164	2	1	1
11	165	6	2	4
11	166	1	8	-7
11	167	3	5	-2
11	168	3	1	2
11	169	2	4	-2
11	170	2	1	1
11	171	6	4	2
11	172	3	4	-1
11	173	6	2	4
11	174	4	3	1
11	175	1	1	0
11	176	3	4	-1
11	177	4	2	2
11	178	5	4	1
11	179	4	3	1
11	180	1	0	1
11	181	2	5	-3
12	1	2	5	-3
12	2	0	2	-2
12	3	6	5	1
12	4	4	5	-1
12	5	4	5	-1
12	6	6	4	2
12	7	4	5	-1
12	8	4	11	-7
12	9	5	4	1
12	10	1	6	-5
12	11	2	2	0
12	12	0	0	0
12	13	5	4	1
12	14	2	4	-2
12	15	2	2	0
12	16	4	8	-4
12	17	4	5	-1
12	18	3	5	-2
12	19	6	1	5
12	20	1	3	-2
12	21	4	3	1
12	22	3	4	-1
12	23	4	6	-2
12	24	0	3	-3
12	25	0	2	-2
12	26	5	3	2
12	27	4	5	-1
12	28	2	4	-2
12	29	3	6	-3
12	30	2	1	1
12	31	1	1	0
12	32	3	9	-6
12	33	2	5	-3
12	34	2	3	-1
12	35	1	2	-1
12	36	5	3	2
12	37	5	2	3
12	38	3	4	-1
12	39	4	6	-2
12	40	3	2	1
12	41	6	6	0
12	42	2	3	-1
12	43	3	8	-5
12	44	1	1	0
12	45	2	2	0
12	46	5	5	0
12	47	4	2	2
12	48	1	4	-3
12	49	0	11	-11
12	50	1	2	-1
12	51	3	6	-3
12	52	3	5	-2
12	53	1	4	-3
12	54	6	1	5
12	55	2	2	0
12	56	6	0	6
12	57	4	4	0
12	58	4	3	1
12	59	3	1	2
12	60	3	6	-3
12	61	4	0	4
12	62	3	4	-1
12	63	2	2	0
12	64	3	0	3
12	65	2	5	-3
12	66	1	5	-4
12	67	2	3	-1
12	68	4	7	-3
12	69	4	3	1
12	70	1	0	1
12	71	3	2	1
12	72	1	1	0
12	73	3	3	0
12	74	1	6	-5
12	75	0	1	-1
12	76	0	2	-2
12	77	3	3	0
12	78	3	1	2
12	79	2	2	0
12	80	3	5	-2
12	81	4	1	3
12	82	1	4	-3
12	83	0	2	-2
12	84	5	3	2
12	85	0	1	-1
12	86	2	3	-1
12	87	4	6	-2
12	88	0	0	0
12	89	3	4	-1
12	90	2	2	0
12	91	2	8	-6
12	92	3	5	-2
12	93	3	1	2
12	94	2	1	1
12	95	2	1	1
12	96	0	2	-2
12	97	5	3	2
12	98	3	4	-1
12	99	2	4	-2
12	100	1	6	-5
12	101	2	1	1
12	102	6	9	-3
12	103	3	3	0
12	104	2	2	0
12	105	3	1	2
12	106	1	2	-1
12	107	0	0	0
12	108	1	1	0
12	109	1	1	0
12	110	1	2	-1
12	111	1	6	-5
12	112	3	2	1
12	113	1	3	-2
12	114	2	4	-2
12	115	0	3	-3
12	116	2	1	1
12	117	5	9	-4
12	118	2	2	0
12	119	4	5	-1
12	120	3	2	1
12	121	6	8	-2
12	122	1	1	0
12	123	4	2	2
12	124	2	2	0
12	125	4	5	-1
12	126	0	0	0
12	127	5	4	1
12	128	3	4	-1
12	129	1	3	-2
12	130	0	5	-5
12	131	0	2	-2
12	132	2	3	-1
12	133	3	3	0
12	134	7	3	4
12	135	3	2	1
12	136	5	3	2
12	137	1	3	-2
12	138	5	2	3
12	139	3	1	2
12	140	4	3	1
12	141	2	1	1
12	142	2	3	-1
12	143	1	4	-3
12	144	1	5	-4
12	145	2	4	-2
12	146	2	3	-1
12	147	6	3	3
12	148	5	2	3
12	149	1	6	-5
12	150	2	5	-3
12	151	3	4	-1
12	152	1	2	-1
12	153	6	3	3
12	154	3	3	0
12	155	5	3	2
12	156	4	5	-1
12	157	5	2	3
12	158	3	2	1
12	159	3	2	1
12	160	0	2	-2
12	161	3	2	1
12	162	1	2	-1
13	1	2	3	-1
13	2	6	6	0
13	3	2	5	-3
13	4	3	9	-6
13	5	3	4	-1
13	6	7	8	-1
13	7	6	5	1
13	8	2	2	0
13	9	5	7	-2
13	10	7	3	4
13	11	2	4	-2
13	12	3	5	-2
13	13	4	4	0
13	14	4	3	1
13	15	5	4	1
13	16	3	4	-1
13	17	4	6	-2
13	18	3	3	0
13	19	6	8	-2
13	20	2	3	-1
13	21	3	0	3
13	22	2	2	0
13	23	2	2	0
13	24	3	3	0
13	25	7	5	2
13	26	4	11	-7
13	27	2	1	1
13	28	7	7	0
13	29	4	7	-3
13	30	1	3	-2
13	31	4	1	3
13	32	12	5	7
13	33	1	3	-2
13	34	4	4	0
13	35	1	0	1
13	36	2	4	-2
13	37	7	8	-1
13	38	3	1	2
13	39	5	3	2
13	40	2	2	0
13	41	4	4	0
13	42	6	3	3
13	43	3	6	-3
13	44	5	4	1
13	45	5	4	1
13	46	3	6	-3
13	47	1	1	0
13	48	2	3	-1
13	49	9	13	-4
13	50	1	3	-2
13	51	3	2	1
13	52	3	2	1
13	53	4	5	-1
13	54	2	2	0
13	55	3	2	1
13	56	5	8	-3
13	57	1	7	-6
13	58	2	2	0
13	59	3	2	1
13	60	4	5	-1
13	61	5	0	5
13	62	2	0	2
13	63	1	0	1
13	64	3	2	1
13	65	6	1	5
13	66	1	3	-2
13	67	5	5	0
13	68	5	4	1
13	69	4	3	1
13	70	5	4	1
13	71	0	1	-1
13	72	2	2	0
13	73	3	3	0
13	74	5	6	-1
13	75	2	3	-1
13	76	5	8	-3
13	77	8	7	1
13	78	3	4	-1
13	79	5	9	-4
13	80	1	1	0
13	81	2	3	-1
13	82	5	5	0
13	83	4	4	0
13	84	5	5	0
13	85	5	4	1
13	86	1	5	-4
13	87	4	3	1
13	88	5	4	1
13	89	2	2	0
13	90	0	0	0
13	91	4	2	2
13	92	6	1	5
13	93	5	2	3
13	94	4	2	2
13	95	2	3	-1
13	96	3	4	-1
13	97	1	1	0
13	98	3	4	-1
13	99	7	3	4
13	100	8	9	-1
13	101	0	5	-5
13	102	3	2	1
13	103	2	4	-2
13	104	1	2	-1
13	105	4	4	0
13	106	1	0	1
13	107	0	4	-4
13	108	2	0	2
13	109	3	7	-4
13	110	3	5	-2
13	111	0	3	-3
13	112	7	3	4
13	113	3	4	-1
13	114	1	1	0
13	115	4	2	2
13	116	2	2	0
13	117	2	1	1
13	118	1	2	-1
13	119	3	4	-1
13	120	4	6	-2
13	121	2	2	0
13	122	5	2	3
13	123	5	3	2
13	124	4	2	2
13	125	3	5	-2
13	126	2	3	-1
13	127	5	4	1
13	128	3	12	-9
13	129	3	5	-2
13	130	6	3	3
13	131	4	5	-1
13	132	3	1	2
13	133	5	7	-2
13	134	7	4	3
13	135	3	2	1
13	136	6	1	5
13	137	5	4	1
13	138	2	2	0
13	139	4	5	-1
13	140	5	4	1
13	141	5	7	-2
13	142	4	4	0
13	143	2	2	0
[truncated: 661 more rows]

## Sheet: 58E02 > CsChr
timeBin	larva	nBendStim	nBendUnstim	bendDiff
1	1	9	5	4
1	2	10	8	2
1	3	11	4	7
1	4	7	8	-1
1	5	7	6	1
1	6	7	8	-1
1	7	5	3	2
1	8	7	6	1
1	9	2	1	1
1	10	8	6	2
1	11	7	6	1
1	12	8	10	-2
1	13	9	11	-2
1	14	7	4	3
1	15	7	7	0
1	16	7	8	-1
1	17	4	7	-3
1	18	6	7	-1
1	19	4	10	-6
1	20	10	5	5
1	21	12	9	3
1	22	6	9	-3
1	23	5	6	-1
1	24	4	8	-4
1	25	10	4	6
1	26	6	7	-1
1	27	7	4	3
1	28	4	6	-2
1	29	6	9	-3
1	30	9	6	3
1	31	10	11	-1
1	32	11	3	8
1	33	6	6	0
1	34	5	6	-1
1	35	2	1	1
1	36	4	9	-5
1	37	5	5	0
1	38	4	6	-2
1	39	6	5	1
1	40	6	8	-2
1	41	4	4	0
1	42	9	8	1
1	43	4	4	0
1	44	9	7	2
1	45	3	2	1
1	46	9	6	3
1	47	9	9	0
1	48	4	8	-4
1	49	5	4	1
1	50	10	4	6
1	51	1	1	0
1	52	5	5	0
1	53	6	8	-2
1	54	5	7	-2
1	55	5	5	0
1	56	7	5	2
1	57	3	2	1
1	58	9	8	1
1	59	6	5	1
1	60	6	2	4
1	61	8	9	-1
1	62	9	6	3
1	63	3	4	-1
1	64	5	5	0
1	65	5	5	0
1	66	5	8	-3
1	67	7	4	3
1	68	2	4	-2
1	69	6	5	1
1	70	3	6	-3
1	71	1	2	-1
1	72	5	4	1
1	73	5	3	2
1	74	5	5	0
1	75	7	12	-5
1	76	6	3	3
1	77	9	6	3
1	78	5	8	-3
1	79	9	5	4
1	80	4	6	-2
1	81	9	7	2
1	82	5	5	0
1	83	3	6	-3
1	84	3	6	-3
1	85	8	7	1
1	86	9	9	0
1	87	8	12	-4
1	88	5	4	1
1	89	11	7	4
1	90	7	9	-2
1	91	8	6	2
1	92	7	6	1
1	93	8	6	2
1	94	5	10	-5
1	95	6	3	3
1	96	10	1	9
1	97	5	8	-3
1	98	11	7	4
1	99	7	6	1
1	100	3	9	-6
1	101	10	6	4
1	102	9	14	-5
1	103	5	7	-2
1	104	3	3	0
1	105	7	7	0
1	106	4	7	-3
1	107	11	6	5
1	108	6	7	-1
1	109	2	5	-3
2	1	7	3	4
2	2	6	5	1
2	3	2	6	-4
2	4	7	8	-1
2	5	3	5	-2
2	6	4	4	0
2	7	5	5	0
2	8	8	6	2
2	9	5	11	-6
2	10	4	4	0
2	11	5	6	-1
2	12	7	4	3
2	13	6	3	3
2	14	6	3	3
2	15	6	3	3
2	16	3	4	-1
2	17	6	3	3
2	18	7	7	0
2	19	3	6	-3
2	20	5	5	0
2	21	4	8	-4
2	22	9	8	1
2	23	6	11	-5
2	24	3	6	-3
2	25	3	8	-5
2	26	7	5	2
2	27	10	3	7
2	28	9	3	6
2	29	4	6	-2
2	30	5	7	-2
2	31	5	8	-3
2	32	4	2	2
2	33	5	3	2
2	34	5	6	-1
2	35	5	6	-1
2	36	6	4	2
2	37	5	7	-2
2	38	10	2	8
2	39	7	0	7
2	40	6	5	1
2	41	3	6	-3
2	42	6	6	0
2	43	3	3	0
2	44	5	3	2
2	45	4	1	3
2	46	3	6	-3
2	47	4	3	1
2	48	4	4	0
2	49	5	6	-1
2	50	5	2	3
2	51	4	4	0
2	52	5	6	-1
2	53	4	2	2
2	54	2	1	1
2	55	5	5	0
2	56	4	9	-5
2	57	4	4	0
2	58	8	1	7
2	59	4	9	-5
2	60	5	4	1
2	61	3	7	-4
2	62	5	9	-4
2	63	4	2	2
2	64	2	6	-4
2	65	0	6	-6
2	66	3	2	1
2	67	5	8	-3
2	68	6	4	2
2	69	6	8	-2
2	70	3	3	0
2	71	2	4	-2
2	72	5	5	0
2	73	3	4	-1
2	74	6	6	0
2	75	4	6	-2
2	76	3	4	-1
2	77	3	4	-1
2	78	3	2	1
2	79	4	2	2
2	80	1	0	1
2	81	8	6	2
2	82	4	1	3
2	83	5	7	-2
2	84	5	2	3
2	85	3	5	-2
2	86	4	3	1
2	87	8	3	5
2	88	1	4	-3
2	89	3	3	0
2	90	10	4	6
2	91	4	3	1
2	92	8	3	5
2	93	8	7	1
2	94	3	3	0
2	95	3	2	1
2	96	7	8	-1
2	97	7	3	4
2	98	4	7	-3
2	99	6	4	2
2	100	7	5	2
2	101	6	3	3
2	102	3	4	-1
2	103	2	5	-3
2	104	6	3	3
2	105	3	1	2
2	106	3	6	-3
2	107	4	4	0
2	108	8	4	4
2	109	4	5	-1
2	110	5	8	-3
2	111	5	6	-1
2	112	4	4	0
2	113	2	5	-3
2	114	8	4	4
2	115	4	3	1
2	116	7	7	0
2	117	5	7	-2
2	118	11	2	9
2	119	5	8	-3
2	120	5	10	-5
2	121	4	7	-3
2	122	4	12	-8
2	123	9	0	9
2	124	8	4	4
2	125	7	0	7
2	126	6	5	1
2	127	3	3	0
2	128	6	8	-2
2	129	0	4	-4
2	130	2	3	-1
2	131	6	1	5
2	132	4	3	1
2	133	1	1	0
2	134	5	9	-4
2	135	6	5	1
3	1	1	3	-2
3	2	7	2	5
3	3	4	4	0
3	4	4	9	-5
3	5	6	5	1
3	6	3	6	-3
3	7	3	4	-1
3	8	6	4	2
3	9	5	6	-1
3	10	5	5	0
3	11	2	2	0
3	12	3	7	-4
3	13	4	4	0
3	14	4	6	-2
3	15	7	6	1
3	16	3	6	-3
3	17	6	6	0
3	18	5	4	1
3	19	5	6	-1
3	20	7	3	4
3	21	3	7	-4
3	22	3	4	-1
3	23	5	7	-2
3	24	3	3	0
3	25	3	5	-2
3	26	6	6	0
3	27	1	4	-3
3	28	4	2	2
3	29	4	2	2
3	30	4	1	3
3	31	3	4	-1
3	32	3	1	2
3	33	7	5	2
3	34	7	5	2
3	35	4	9	-5
3	36	3	7	-4
3	37	4	4	0
3	38	6	5	1
3	39	4	5	-1
3	40	3	3	0
3	41	3	11	-8
3	42	5	6	-1
3	43	3	2	1
3	44	5	1	4
3	45	4	5	-1
3	46	6	7	-1
3	47	2	9	-7
3	48	6	7	-1
3	49	4	7	-3
3	50	2	2	0
3	51	6	4	2
3	52	6	5	1
3	53	3	2	1
3	54	3	4	-1
3	55	5	1	4
3	56	5	5	0
3	57	2	4	-2
3	58	3	0	3
3	59	3	3	0
3	60	3	4	-1
3	61	2	2	0
3	62	3	1	2
3	63	3	3	0
3	64	3	5	-2
3	65	7	6	1
3	66	4	5	-1
3	67	3	7	-4
3	68	2	8	-6
3	69	4	5	-1
3	70	3	7	-4
3	71	2	2	0
3	72	2	3	-1
3	73	2	6	-4
3	74	4	5	-1
3	75	5	2	3
3	76	2	7	-5
3	77	6	2	4
3	78	4	3	1
3	79	2	4	-2
3	80	3	2	1
3	81	6	3	3
3	82	5	7	-2
3	83	6	5	1
3	84	2	3	-1
3	85	2	5	-3
3	86	4	2	2
3	87	3	6	-3
3	88	2	1	1
3	89	2	5	-3
3	90	8	4	4
3	91	4	1	3
3	92	2	3	-1
3	93	4	5	-1
3	94	5	6	-1
3	95	1	1	0
3	96	3	4	-1
3	97	5	4	1
3	98	1	1	0
3	99	8	8	0
3	100	4	10	-6
3	101	3	4	-1
3	102	1	4	-3
3	103	5	4	1
3	104	2	4	-2
3	105	4	7	-3
3	106	3	6	-3
3	107	3	8	-5
3	108	1	3	-2
3	109	1	6	-5
3	110	10	3	7
3	111	3	7	-4
3	112	7	6	1
3	113	5	5	0
3	114	2	5	-3
3	115	3	4	-1
3	116	4	4	0
3	117	3	5	-2
3	118	3	4	-1
3	119	5	5	0
3	120	8	9	-1
3	121	1	3	-2
3	122	3	11	-8
3	123	6	6	0
3	124	4	5	-1
3	125	3	6	-3
3	126	4	4	0
3	127	5	4	1
3	128	7	8	-1
3	129	5	9	-4
3	130	6	6	0
3	131	3	8	-5
3	132	7	5	2
3	133	5	8	-3
3	134	2	2	0
3	135	5	10	-5
3	136	4	8	-4
3	137	8	5	3
3	138	6	3	3
3	139	1	0	1
3	140	2	7	-5
3	141	2	7	-5
3	142	2	4	-2
3	143	2	7	-5
3	144	5	6	-1
3	145	6	9	-3
3	146	3	5	-2
4	1	1	5	-4
4	2	6	2	4
4	3	6	4	2
4	4	4	3	1
4	5	6	5	1
4	6	6	4	2
4	7	3	5	-2
4	8	2	1	1
4	9	2	4	-2
4	10	4	3	1
4	11	4	4	0
4	12	5	3	2
4	13	7	3	4
4	14	6	4	2
4	15	4	3	1
4	16	7	2	5
4	17	4	3	1
4	18	4	5	-1
4	19	5	6	-1
4	20	4	4	0
4	21	2	6	-4
4	22	6	2	4
4	23	4	4	0
4	24	4	2	2
4	25	6	3	3
4	26	6	6	0
4	27	1	5	-4
4	28	8	4	4
4	29	5	4	1
4	30	5	3	2
4	31	2	6	-4
4	32	3	6	-3
4	33	3	2	1
4	34	4	2	2
4	35	3	5	-2
4	36	7	2	5
4	37	2	6	-4
4	38	6	7	-1
4	39	2	4	-2
4	40	2	4	-2
4	41	1	4	-3
4	42	2	6	-4
4	43	6	8	-2
4	44	6	4	2
4	45	4	7	-3
4	46	5	7	-2
4	47	6	5	1
4	48	6	4	2
4	49	3	9	-6
4	50	4	9	-5
4	51	6	5	1
4	52	4	2	2
4	53	4	6	-2
4	54	5	3	2
4	55	1	8	-7
4	56	4	4	0
4	57	6	2	4
4	58	4	9	-5
4	59	6	4	2
4	60	6	4	2
4	61	5	5	0
4	62	3	2	1
4	63	4	6	-2
4	64	7	1	6
4	65	4	3	1
4	66	3	9	-6
4	67	4	3	1
4	68	5	4	1
4	69	5	5	0
4	70	1	4	-3
4	71	5	5	0
4	72	5	2	3
4	73	5	4	1
4	74	2	6	-4
4	75	4	7	-3
4	76	4	7	-3
4	77	7	3	4
4	78	2	5	-3
4	79	5	3	2
4	80	4	4	0
4	81	2	5	-3
4	82	3	4	-1
4	83	5	3	2
4	84	2	8	-6
4	85	4	10	-6
4	86	3	4	-1
4	87	1	3	-2
4	88	7	7	0
4	89	1	6	-5
4	90	3	3	0
4	91	2	1	1
4	92	4	1	3
4	93	6	6	0
4	94	4	4	0
4	95	3	7	-4
4	96	3	2	1
4	97	3	5	-2
4	98	2	5	-3
4	99	6	4	2
4	100	2	2	0
4	101	8	4	4
4	102	5	1	4
4	103	8	3	5
4	104	6	1	5
4	105	4	7	-3
4	106	4	5	-1
4	107	6	5	1
4	108	4	3	1
4	109	2	7	-5
4	110	4	12	-8
4	111	4	2	2
4	112	5	5	0
4	113	4	5	-1
4	114	1	4	-3
4	115	4	5	-1
4	116	5	6	-1
4	117	2	3	-1
4	118	7	8	-1
4	119	3	11	-8
4	120	3	2	1
4	121	4	7	-3
4	122	4	1	3
4	123	3	2	1
4	124	4	6	-2
4	125	4	7	-3
4	126	2	4	-2
4	127	3	6	-3
4	128	5	10	-5
4	129	5	9	-4
4	130	6	6	0
4	131	2	4	-2
4	132	3	2	1
4	133	2	7	-5
4	134	3	3	0
4	135	4	7	-3
4	136	4	6	-2
4	137	4	4	0
4	138	4	3	1
4	139	2	11	-9
4	140	5	3	2
4	141	2	7	-5
4	142	8	2	6
4	143	3	3	0
4	144	6	6	0
4	145	5	3	2
4	146	8	7	1
4	147	3	10	-7
4	148	3	1	2
4	149	5	4	1
4	150	4	7	-3
4	151	1	4	-3
4	152	3	4	-1
4	153	8	5	3
4	154	7	10	-3
4	155	1	8	-7
4	156	4	5	-1
4	157	5	5	0
4	158	1	1	0
4	159	4	7	-3
4	160	5	5	0
4	161	3	3	0
4	162	5	6	-1
4	163	3	2	1
4	164	2	6	-4
4	165	2	2	0
4	166	3	6	-3
4	167	3	5	-2
4	168	3	5	-2
4	169	4	9	-5
4	170	2	2	0
5	1	7	2	5
5	2	3	6	-3
5	3	4	4	0
5	4	3	5	-2
5	5	1	3	-2
5	6	7	4	3
5	7	3	4	-1
5	8	6	1	5
5	9	5	6	-1
5	10	4	2	2
5	11	1	3	-2
5	12	4	4	0
5	13	6	7	-1
5	14	4	6	-2
5	15	2	3	-1
5	16	5	3	2
5	17	4	2	2
5	18	7	7	0
5	19	3	6	-3
5	20	4	2	2
5	21	4	3	1
5	22	4	4	0
5	23	4	5	-1
5	24	5	3	2
5	25	5	4	1
5	26	9	4	5
5	27	6	3	3
5	28	5	5	0
5	29	4	7	-3
5	30	0	0	0
5	31	9	7	2
5	32	4	8	-4
5	33	5	1	4
5	34	3	6	-3
5	35	9	7	2
5	36	2	9	-7
5	37	5	6	-1
5	38	4	3	1
5	39	1	3	-2
5	40	5	5	0
5	41	5	11	-6
5	42	5	1	4
5	43	3	4	-1
5	44	5	5	0
5	45	5	4	1
5	46	2	3	-1
5	47	5	0	5
5	48	5	5	0
5	49	2	10	-8
5	50	4	7	-3
5	51	5	1	4
5	52	8	6	2
5	53	4	3	1
5	54	3	5	-2
5	55	5	2	3
5	56	5	6	-1
5	57	4	9	-5
5	58	5	0	5
5	59	4	7	-3
5	60	4	2	2
5	61	3	1	2
5	62	5	6	-1
5	63	3	5	-2
5	64	2	3	-1
5	65	5	6	-1
5	66	6	7	-1
5	67	4	2	2
5	68	6	3	3
5	69	3	5	-2
5	70	5	3	2
5	71	6	6	0
5	72	4	7	-3
5	73	3	4	-1
5	74	4	6	-2
5	75	2	2	0
5	76	6	8	-2
5	77	8	5	3
5	78	5	6	-1
5	79	5	4	1
5	80	8	4	4
5	81	5	7	-2
5	82	7	3	4
5	83	2	3	-1
5	84	3	6	-3
5	85	5	5	0
5	86	1	2	-1
5	87	8	5	3
5	88	12	7	5
5	89	2	2	0
5	90	3	2	1
5	91	6	5	1
5	92	1	1	0
5	93	3	2	1
5	94	5	3	2
5	95	6	2	4
5	96	7	5	2
5	97	3	5	-2
5	98	5	4	1
5	99	1	6	-5
5	100	3	6	-3
5	101	5	3	2
5	102	4	2	2
5	103	7	4	3
5	104	8	3	5
5	105	4	3	1
5	106	5	8	-3
5	107	7	5	2
5	108	9	4	5
5	109	6	6	0
5	110	3	3	0
5	111	2	4	-2
5	112	4	10	-6
5	113	7	6	1
5	114	5	4	1
5	115	4	5	-1
5	116	8	2	6
5	117	7	6	1
5	118	3	3	0
5	119	1	5	-4
5	120	4	2	2
5	121	6	3	3
5	122	4	9	-5
5	123	5	4	1
5	124	5	5	0
5	125	5	3	2
5	126	3	5	-2
5	127	6	7	-1
5	128	5	8	-3
5	129	5	4	1
5	130	3	2	1
5	131	6	7	-1
5	132	8	6	2
5	133	7	2	5
5	134	1	3	-2
5	135	4	9	-5
5	136	2	4	-2
5	137	8	6	2
5	138	3	4	-1
5	139	6	3	3
5	140	2	5	-3
5	141	7	6	1
5	142	3	4	-1
5	143	3	3	0
5	144	5	4	1
5	145	4	6	-2
5	146	2	3	-1
5	147	5	6	-1
5	148	6	9	-3
5	149	9	7	2
5	150	1	4	-3
5	151	6	5	1
5	152	4	3	1
5	153	2	3	-1
5	154	1	6	-5
5	155	5	6	-1
5	156	5	2	3
5	157	2	7	-5
5	158	4	6	-2
5	159	1	3	-2
5	160	8	6	2
5	161	4	6	-2
6	1	2	6	-4
6	2	5	3	2
6	3	5	7	-2
6	4	0	8	-8
6	5	6	4	2
6	6	6	7	-1
6	7	5	6	-1
6	8	3	4	-1
6	9	6	9	-3
6	10	4	5	-1
6	11	6	4	2
6	12	7	9	-2
6	13	4	5	-1
6	14	3	12	-9
6	15	3	6	-3
6	16	6	8	-2
6	17	4	8	-4
6	18	6	4	2
6	19	11	6	5
6	20	5	3	2
6	21	1	1	0
6	22	5	6	-1
6	23	3	5	-2
6	24	3	2	1
6	25	2	2	0
6	26	7	5	2
6	27	4	7	-3
6	28	2	3	-1
6	29	3	3	0
6	30	7	2	5
6	31	5	7	-2
6	32	3	5	-2
6	33	3	6	-3
6	34	3	7	-4
6	35	7	4	3
6	36	3	1	2
6	37	7	6	1
6	38	4	5	-1
6	39	1	3	-2
6	40	7	1	6
6	41	4	7	-3
6	42	4	8	-4
6	43	7	6	1
6	44	4	4	0
6	45	3	5	-2
6	46	4	6	-2
6	47	3	4	-1
6	48	5	2	3
6	49	6	5	1
6	50	3	7	-4
6	51	7	7	0
6	52	4	8	-4
6	53	5	6	-1
6	54	8	7	1
6	55	4	6	-2
6	56	5	6	-1
6	57	6	3	3
6	58	4	7	-3
6	59	4	3	1
6	60	3	3	0
6	61	4	4	0
6	62	2	1	1
6	63	6	6	0
6	64	6	1	5
6	65	0	1	-1
6	66	3	5	-2
6	67	5	8	-3
6	68	8	10	-2
6	69	4	5	-1
6	70	0	2	-2
6	71	3	3	0
6	72	6	2	4
6	73	1	3	-2
6	74	2	1	1
6	75	4	3	1
6	76	3	4	-1
6	77	2	4	-2
6	78	5	2	3
6	79	7	9	-2
6	80	7	3	4
6	81	4	5	-1
6	82	2	4	-2
6	83	6	8	-2
6	84	5	5	0
6	85	5	2	3
6	86	6	9	-3
6	87	5	7	-2
6	88	3	8	-5
6	89	2	5	-3
6	90	2	2	0
6	91	6	7	-1
6	92	4	2	2
6	93	2	8	-6
6	94	6	6	0
6	95	4	6	-2
6	96	3	2	1
6	97	1	1	0
6	98	0	6	-6
6	99	3	2	1
6	100	4	0	4
6	101	3	6	-3
6	102	4	5	-1
6	103	5	6	-1
7	1	3	3	0
7	2	2	4	-2
7	3	9	8	1
7	4	6	2	4
7	5	10	3	7
7	6	7	8	-1
7	7	6	7	-1
7	8	7	5	2
7	9	3	7	-4
7	10	2	3	-1
7	11	7	4	3
7	12	2	3	-1
7	13	4	5	-1
7	14	3	6	-3
7	15	4	7	-3
7	16	4	4	0
7	17	4	5	-1
7	18	2	3	-1
7	19	4	1	3
7	20	4	4	0
7	21	3	7	-4
7	22	6	5	1
7	23	7	5	2
7	24	5	6	-1
7	25	3	3	0
7	26	5	4	1
7	27	9	4	5
7	28	3	4	-1
7	29	2	0	2
7	30	1	6	-5
7	31	3	5	-2
7	32	2	3	-1
7	33	1	1	0
7	34	4	7	-3
7	35	5	9	-4
7	36	3	3	0
7	37	2	5	-3
7	38	4	2	2
7	39	3	3	0
7	40	5	7	-2
7	41	4	5	-1
7	42	7	8	-1
7	43	5	7	-2
7	44	5	5	0
7	45	5	3	2
7	46	1	1	0
7	47	3	12	-9
7	48	5	4	1
7	49	3	4	-1
7	50	2	4	-2
7	51	10	7	3
7	52	6	4	2
7	53	3	3	0
7	54	4	6	-2
7	55	3	4	-1
7	56	7	9	-2
7	57	3	2	1
7	58	7	4	3
7	59	4	8	-4
7	60	3	5	-2
7	61	2	4	-2
7	62	4	8	-4
7	63	4	11	-7
7	64	1	6	-5
7	65	3	4	-1
7	66	2	5	-3
7	67	6	6	0
7	68	4	7	-3
7	69	4	6	-2
7	70	3	7	-4
7	71	5	5	0
7	72	1	2	-1
7	73	10	3	7
7	74	4	2	2
7	75	4	3	1
7	76	1	3	-2
7	77	3	4	-1
7	78	4	7	-3
7	79	6	7	-1
7	80	3	5	-2
7	81	1	2	-1
7	82	1	2	-1
7	83	4	1	3
7	84	4	0	4
7	85	7	6	1
7	86	0	0	0
7	87	2	3	-1
7	88	4	7	-3
7	89	3	3	0
7	90	6	4	2
7	91	6	6	0
7	92	5	2	3
7	93	3	4	-1
7	94	3	2	1
7	95	1	1	0
7	96	2	2	0
7	97	4	4	0
7	98	0	2	-2
7	99	5	7	-2
7	100	1	3	-2
7	101	3	4	-1
7	102	6	6	0
7	103	7	3	4
7	104	1	3	-2
7	105	5	6	-1
7	106	4	8	-4
7	107	5	3	2
7	108	6	4	2
7	109	4	2	2
7	110	3	3	0
7	111	2	1	1
7	112	6	4	2
7	113	0	5	-5
7	114	1	5	-4
7	115	5	6	-1
7	116	8	6	2
7	117	3	0	3
7	118	3	3	0
7	119	3	1	2
7	120	5	5	0
7	121	2	4	-2
7	122	2	7	-5
7	123	4	6	-2
7	124	3	7	-4
7	125	5	2	3
7	126	4	5	-1
7	127	4	3	1
7	128	1	4	-3
7	129	4	7	-3
7	130	2	4	-2
7	131	5	3	2
7	132	3	3	0
7	133	4	4	0
7	134	3	7	-4
7	135	4	3	1
7	136	5	7	-2
7	137	5	4	1
7	138	2	3	-1
7	139	7	9	-2
7	140	3	3	0
7	141	5	4	1
7	142	4	5	-1
7	143	1	2	-1
7	144	4	5	-1
7	145	4	7	-3
8	1	3	2	1
8	2	3	5	-2
8	3	8	2	6
8	4	4	2	2
8	5	3	9	-6
8	6	4	4	0
8	7	4	4	0
8	8	8	5	3
8	9	6	6	0
8	10	4	9	-5
8	11	4	3	1
8	12	6	6	0
8	13	5	4	1
8	14	2	6	-4
8	15	4	6	-2
8	16	6	6	0
8	17	5	3	2
8	18	4	3	1
8	19	1	3	-2
8	20	2	3	-1
8	21	5	2	3
8	22	1	4	-3
8	23	5	6	-1
8	24	5	2	3
8	25	2	4	-2
8	26	6	2	4
8	27	3	4	-1
8	28	8	7	1
8	29	1	1	0
8	30	6	3	3
8	31	4	2	2
8	32	3	4	-1
8	33	5	3	2
8	34	7	3	4
8	35	3	4	-1
8	36	5	6	-1
8	37	5	7	-2
8	38	5	4	1
8	39	3	4	-1
8	40	2	4	-2
8	41	3	2	1
8	42	3	6	-3
8	43	6	5	1
8	44	8	6	2
8	45	4	7	-3
8	46	4	2	2
8	47	4	4	0
8	48	3	2	1
8	49	4	6	-2
8	50	4	3	1
8	51	6	5	1
8	52	7	4	3
8	53	3	2	1
8	54	3	5	-2
8	55	5	2	3
8	56	6	5	1
8	57	4	2	2
8	58	5	5	0
8	59	1	5	-4
8	60	6	5	1
8	61	2	1	1
8	62	2	10	-8
8	63	6	4	2
8	64	3	9	-6
8	65	6	7	-1
8	66	1	0	1
8	67	3	10	-7
8	68	1	2	-1
8	69	5	2	3
8	70	5	5	0
8	71	7	3	4
8	72	3	2	1
8	73	6	4	2
8	74	1	5	-4
8	75	3	5	-2
8	76	3	3	0
8	77	4	7	-3
8	78	3	3	0
8	79	2	1	1
8	80	2	6	-4
8	81	3	4	-1
8	82	2	8	-6
8	83	2	6	-4
8	84	5	2	3
8	85	4	3	1
8	86	2	1	1
8	87	4	0	4
8	88	3	4	-1
8	89	6	4	2
8	90	4	8	-4
8	91	7	2	5
8	92	6	2	4
8	93	4	7	-3
8	94	5	3	2
8	95	6	5	1
8	96	4	6	-2
8	97	6	7	-1
8	98	10	3	7
8	99	7	4	3
8	100	5	4	1
8	101	5	2	3
8	102	1	3	-2
8	103	5	5	0
8	104	4	5	-1
8	105	4	7	-3
8	106	4	9	-5
8	107	2	1	1
8	108	4	5	-1
8	109	2	3	-1
8	110	6	4	2
8	111	5	10	-5
8	112	7	6	1
8	113	5	2	3
8	114	1	5	-4
8	115	4	4	0
8	116	2	10	-8
8	117	4	8	-4
8	118	5	6	-1
8	119	7	7	0
8	120	2	1	1
8	121	4	9	-5
8	122	7	4	3
8	123	1	4	-3
8	124	1	2	-1
8	125	7	1	6
8	126	2	3	-1
8	127	4	5	-1
8	128	2	2	0
8	129	3	3	0
8	130	6	2	4
8	131	4	4	0
8	132	2	4	-2
8	133	5	4	1
8	134	2	9	-7
8	135	7	9	-2
8	136	2	3	-1
8	137	3	1	2
8	138	1	4	-3
8	139	4	2	2
8	140	5	2	3
8	141	2	7	-5
8	142	4	2	2
8	143	4	4	0
9	1	5	5	0
9	2	5	6	-1
9	3	6	4	2
9	4	4	7	-3
9	5	6	8	-2
9	6	6	5	1
9	7	5	3	2
9	8	4	4	0
9	9	7	4	3
9	10	5	3	2
9	11	4	1	3
9	12	3	4	-1
9	13	3	2	1
9	14	8	4	4
9	15	3	5	-2
9	16	3	3	0
9	17	6	8	-2
9	18	7	7	0
9	19	4	4	0
9	20	5	4	1
9	21	8	3	5
9	22	7	6	1
9	23	7	3	4
9	24	3	5	-2
9	25	6	6	0
9	26	2	1	1
9	27	4	3	1
9	28	9	3	6
9	29	3	3	0
9	30	3	6	-3
9	31	1	4	-3
9	32	6	3	3
9	33	7	7	0
9	34	2	4	-2
9	35	5	3	2
9	36	4	8	-4
9	37	3	6	-3
9	38	3	2	1
9	39	3	5	-2
9	40	2	0	2
9	41	7	4	3
9	42	4	6	-2
9	43	5	2	3
9	44	5	5	0
9	45	5	8	-3
9	46	3	4	-1
9	47	5	3	2
9	48	6	6	0
9	49	4	5	-1
9	50	4	6	-2
9	51	5	5	0
9	52	5	8	-3
9	53	7	4	3
9	54	6	2	4
9	55	4	4	0
9	56	4	4	0
9	57	6	2	4
9	58	7	6	1
9	59	6	1	5
9	60	1	1	0
9	61	3	5	-2
9	62	3	7	-4
9	63	4	6	-2
9	64	3	6	-3
9	65	7	7	0
9	66	1	5	-4
9	67	4	5	-1
9	68	3	3	0
9	69	4	8	-4
9	70	1	6	-5
9	71	2	2	0
9	72	6	5	1
9	73	9	5	4
9	74	5	6	-1
9	75	2	2	0
9	76	4	3	1
9	77	10	5	5
9	78	3	4	-1
9	79	4	4	0
9	80	3	5	-2
9	81	6	6	0
9	82	1	0	1
9	83	2	2	0
9	84	5	5	0
9	85	3	3	0
9	86	6	2	4
9	87	7	4	3
9	88	3	3	0
9	89	5	0	5
9	90	7	4	3
9	91	2	2	0
9	92	3	2	1
9	93	3	6	-3
9	94	2	2	0
9	95	5	2	3
9	96	6	7	-1
9	97	4	2	2
9	98	6	6	0
9	99	3	5	-2
9	100	3	4	-1
9	101	7	3	4
9	102	2	2	0
9	103	1	2	-1
9	104	0	6	-6
9	105	2	7	-5
9	106	7	5	2
9	107	2	3	-1
9	108	4	3	1
9	109	5	2	3
9	110	2	9	-7
9	111	6	1	5
9	112	5	5	0
9	113	3	2	1
9	114	6	2	4
9	115	5	7	-2
9	116	2	10	-8
9	117	5	4	1
9	118	5	2	3
9	119	2	4	-2
9	120	3	2	1
9	121	7	6	1
9	122	6	5	1
9	123	7	3	4
9	124	5	2	3
9	125	5	7	-2
9	126	2	1	1
9	127	5	5	0
9	128	5	5	0
9	129	8	8	0
9	130	1	5	-4
9	131	5	6	-1
9	132	1	5	-4
9	133	4	3	1
9	134	4	3	1
9	135	2	3	-1
9	136	4	3	1
10	1	5	5	0
10	2	7	5	2
10	3	5	4	1
10	4	2	4	-2
10	5	8	10	-2
10	6	2	3	-1
10	7	4	8	-4
10	8	9	9	0
10	9	4	2	2
10	10	6	3	3
10	11	4	12	-8
10	12	8	8	0
10	13	6	7	-1
10	14	6	10	-4
10	15	4	10	-6
10	16	4	6	-2
10	17	6	10	-4
10	18	9	8	1
10	19	7	7	0
10	20	2	4	-2
10	21	5	7	-2
10	22	2	4	-2
10	23	3	6	-3
10	24	4	9	-5
10	25	1	2	-1
10	26	7	6	1
10	27	5	7	-2
10	28	5	3	2
10	29	5	3	2
10	30	7	5	2
10	31	1	3	-2
10	32	3	2	1
10	33	8	9	-1
10	34	1	4	-3
10	35	9	4	5
10	36	1	1	0
10	37	5	7	-2
10	38	4	4	0
10	39	8	7	1
10	40	3	6	-3
10	41	2	3	-1
10	42	1	6	-5
10	43	5	7	-2
10	44	2	4	-2
10	45	4	8	-4
10	46	3	2	1
10	47	5	4	1
10	48	5	6	-1
10	49	5	6	-1
10	50	4	6	-2
10	51	4	7	-3
10	52	7	4	3
10	53	0	0	0
10	54	3	3	0
10	55	5	9	-4
10	56	6	3	3
10	57	7	9	-2
10	58	7	5	2
10	59	3	3	0
10	60	5	2	3
10	61	3	2	1
10	62	4	4	0
10	63	6	3	3
10	64	5	5	0
10	65	2	3	-1
10	66	6	3	3
10	67	5	4	1
10	68	4	5	-1
10	69	4	5	-1
10	70	6	6	0
10	71	2	0	2
10	72	3	8	-5
10	73	1	2	-1
10	74	3	7	-4
10	75	6	4	2
10	76	4	9	-5
10	77	4	8	-4
10	78	3	5	-2
10	79	7	7	0
10	80	2	4	-2
10	81	5	9	-4
10	82	7	8	-1
10	83	2	10	-8
10	84	7	9	-2
10	85	3	4	-1
10	86	3	5	-2
10	87	8	4	4
10	88	3	5	-2
10	89	4	4	0
10	90	0	0	0
10	91	6	4	2
11	1	7	3	4
11	2	5	5	0
11	3	5	2	3
11	4	5	5	0
11	5	5	4	1
11	6	4	5	-1
11	7	7	5	2
11	8	3	6	-3
11	9	5	2	3
11	10	6	6	0
11	11	4	4	0
11	12	5	2	3
11	13	3	5	-2
11	14	2	1	1
11	15	6	4	2
11	16	5	2	3
11	17	4	5	-1
11	18	7	7	0
11	19	3	2	1
11	20	4	3	1
11	21	0	30	-30
11	22	1	6	-5
11	23	5	7	-2
11	24	7	3	4
11	25	2	5	-3
11	26	5	11	-6
11	27	4	4	0
11	28	7	1	6
11	29	5	4	1
11	30	7	9	-2
11	31	4	6	-2
11	32	3	6	-3
11	33	2	7	-5
11	34	5	6	-1
11	35	5	4	1
11	36	3	5	-2
11	37	5	3	2
11	38	2	6	-4
11	39	2	4	-2
11	40	1	2	-1
11	41	6	7	-1
11	42	1	2	-1
11	43	2	5	-3
11	44	4	2	2
11	45	3	3	0
11	46	7	4	3
11	47	0	1	-1
11	48	4	8	-4
11	49	5	3	2
11	50	3	6	-3
11	51	5	7	-2
11	52	7	5	2
11	53	3	1	2
11	54	6	5	1
11	55	3	5	-2
11	56	5	7	-2
11	57	2	8	-6
11	58	3	4	-1
11	59	7	6	1
11	60	2	5	-3
11	61	3	3	0
11	62	5	5	0
11	63	1	4	-3
11	64	5	7	-2
11	65	6	6	0
11	66	6	7	-1
11	67	3	6	-3
11	68	3	5	-2
11	69	3	3	0
11	70	8	2	6
11	71	4	5	-1
11	72	6	6	0
11	73	7	5	2
11	74	3	6	-3
11	75	3	0	3
11	76	7	6	1
11	77	6	5	1
11	78	5	4	1
11	79	3	2	1
11	80	1	4	-3
11	81	5	3	2
11	82	5	6	-1
11	83	5	2	3
11	84	6	5	1
11	85	2	3	-1
11	86	3	5	-2
11	87	6	4	2
11	88	5	10	-5
11	89	7	10	-3
11	90	5	3	2
11	91	5	9	-4
11	92	3	5	-2
11	93	1	3	-2
11	94	5	7	-2
11	95	9	6	3
11	96	0	1	-1
11	97	1	1	0
11	98	5	5	0
11	99	7	8	-1
11	100	6	10	-4
11	101	5	3	2
11	102	5	7	-2
11	103	5	7	-2
11	104	3	5	-2
11	105	2	4	-2
11	106	1	2	-1
11	107	1	2	-1
11	108	5	7	-2
11	109	8	3	5
11	110	8	8	0
11	111	6	5	1
11	112	4	6	-2
11	113	6	6	0
11	114	1	5	-4
11	115	2	5	-3
11	116	4	6	-2
11	117	2	6	-4
11	118	2	5	-3
11	119	3	4	-1
11	120	6	5	1
11	121	1	6	-5
11	122	3	1	2
11	123	2	1	1
11	124	3	6	-3
11	125	1	1	0
11	126	3	2	1
11	127	5	8	-3
11	128	4	3	1
11	129	7	6	1
11	130	2	6	-4
11	131	6	7	-1
11	132	2	2	0
11	133	5	4	1
11	134	4	4	0
11	135	5	2	3
11	136	4	4	0
11	137	3	9	-6
11	138	4	7	-3
11	139	2	2	0
11	140	4	11	-7
11	141	8	4	4
12	1	2	2	0
12	2	2	4	-2
12	3	8	3	5
12	4	2	6	-4
12	5	1	4	-3
12	6	4	3	1
12	7	1	2	-1
12	8	2	2	0
12	9	3	4	-1
12	10	4	4	0
12	11	5	6	-1
12	12	2	4	-2
12	13	4	4	0
12	14	3	4	-1
12	15	3	5	-2
12	16	6	5	1
12	17	3	4	-1
12	18	6	6	0
12	19	5	8	-3
12	20	3	3	0
12	21	5	2	3
12	22	4	4	0
12	23	4	3	1
12	24	8	5	3
12	25	2	5	-3
12	26	8	4	4
12	27	4	5	-1
12	28	2	3	-1
12	29	4	4	0
12	30	3	7	-4
12	31	6	4	2
12	32	1	5	-4
12	33	4	7	-3
12	34	3	3	0
12	35	3	4	-1
12	36	8	6	2
12	37	6	4	2
12	38	3	6	-3
12	39	5	6	-1
12	40	1	3	-2
12	41	0	6	-6
12	42	4	2	2
12	43	6	5	1
12	44	2	2	0
12	45	1	5	-4
12	46	3	5	-2
12	47	5	2	3
12	48	4	3	1
12	49	2	1	1
12	50	7	4	3
12	51	5	4	1
12	52	1	5	-4
12	53	5	5	0
12	54	3	5	-2
12	55	4	8	-4
12	56	5	4	1
12	57	3	3	0
12	58	3	1	2
12	59	0	4	-4
12	60	3	4	-1
12	61	9	11	-2
12	62	3	4	-1
12	63	6	7	-1
12	64	3	2	1
12	65	6	3	3
12	66	3	4	-1
12	67	5	4	1
12	68	4	1	3
12	69	1	6	-5
12	70	2	5	-3
12	71	3	2	1
12	72	4	3	1
12	73	8	5	3
12	74	4	5	-1
12	75	3	6	-3
12	76	1	0	1
12	77	2	1	1
12	78	6	7	-1
12	79	3	7	-4
12	80	6	8	-2
12	81	4	3	1
12	82	4	1	3
12	83	6	5	1
12	84	1	3	-2
12	85	5	6	-1
12	86	5	8	-3
12	87	5	7	-2
12	88	4	3	1
12	89	2	5	-3
12	90	7	4	3
12	91	2	4	-2
12	92	4	5	-1
12	93	3	3	0
12	94	7	7	0
12	95	4	7	-3
12	96	5	7	-2
12	97	4	9	-5
12	98	10	8	2
12	99	3	5	-2
12	100	6	5	1
12	101	3	5	-2
12	102	2	5	-3
12	103	2	1	1
12	104	4	8	-4
12	105	3	3	0
12	106	5	9	-4
12	107	4	7	-3
12	108	7	5	2
12	109	5	9	-4
12	110	8	8	0
12	111	5	11	-6
12	112	2	7	-5
12	113	3	5	-2
12	114	4	6	-2
12	115	2	6	-4
12	116	1	5	-4
12	117	2	4	-2
12	118	2	6	-4
12	119	6	8	-2
12	120	4	4	0
12	121	1	0	1
12	122	4	2	2
12	123	3	7	-4
12	124	1	2	-1
12	125	4	5	-1
12	126	7	5	2
12	127	3	5	-2
12	128	4	3	1
12	129	2	6	-4
12	130	5	3	2
12	131	4	7	-3
12	132	5	9	-4
13	1	3	3	0
13	2	4	6	-2
13	3	8	2	6
13	4	5	2	3
13	5	2	3	-1
13	6	1	2	-1
13	7	2	4	-2
13	8	4	6	-2
13	9	4	5	-1
13	10	4	7	-3
13	11	3	8	-5
13	12	4	2	2
13	13	3	3	0
13	14	2	5	-3
13	15	4	4	0
13	16	0	28	-28
13	17	3	6	-3
13	18	4	2	2
13	19	9	4	5
13	20	5	2	3
13	21	3	3	0
13	22	4	6	-2
13	23	2	3	-1
13	24	3	4	-1
13	25	1	4	-3
13	26	3	1	2
13	27	5	5	0
13	28	6	6	0
13	29	3	4	-1
13	30	4	4	0
13	31	4	5	-1
13	32	4	6	-2
13	33	2	2	0
13	34	8	1	7
13	35	2	3	-1
13	36	3	5	-2
13	37	2	3	-1
13	38	1	2	-1
13	39	4	2	2
13	40	6	6	0
13	41	5	9	-4
13	42	2	4	-2
13	43	7	6	1
13	44	7	5	2
13	45	9	5	4
13	46	5	4	1
13	47	3	4	-1
13	48	2	2	0
13	49	2	3	-1
13	50	2	3	-1
13	51	6	9	-3
13	52	6	5	1
13	53	3	7	-4
13	54	3	3	0
13	55	6	5	1
13	56	2	2	0
13	57	4	4	0
13	58	3	4	-1
13	59	5	5	0
13	60	6	8	-2
13	61	3	2	1
13	62	8	8	0
13	63	2	5	-3
13	64	0	1	-1
13	65	5	6	-1
13	66	3	7	-4
13	67	2	3	-1
13	68	3	5	-2
13	69	5	2	3
13	70	3	6	-3
13	71	4	3	1
13	72	5	5	0
13	73	4	5	-1
13	74	6	6	0
13	75	6	6	0
13	76	5	4	1
13	77	7	5	2
13	78	0	5	-5
13	79	1	2	-1
13	80	10	5	5
13	81	9	2	7
13	82	3	5	-2
13	83	4	5	-1
13	84	7	4	3
13	85	8	6	2
13	86	2	1	1
13	87	4	2	2
13	88	2	4	-2
13	89	3	3	0
13	90	5	2	3
13	91	6	7	-1
13	92	5	2	3
13	93	6	4	2
13	94	5	4	1
13	95	4	4	0
13	96	3	6	-3
13	97	4	5	-1
13	98	3	7	-4
13	99	3	6	-3
13	100	7	1	6
13	101	3	4	-1
13	102	4	0	4
13	103	14	9	5
13	104	5	6	-1
13	105	5	5	0
13	106	7	3	4
13	107	6	4	2
13	108	3	3	0
13	109	3	2	1
13	110	7	4	3
13	111	1	3	-2
13	112	3	4	-1
13	113	2	3	-1
13	114	8	9	-1
13	115	4	4	0
13	116	4	3	1
13	117	2	6	-4
13	118	2	5	-3
13	119	7	6	1
13	120	1	1	0
13	121	2	3	-1
13	122	3	4	-1
13	123	1	1	0
13	124	4	2	2
13	125	2	2	0
13	126	2	3	-1
13	127	3	2	1
13	128	3	3	0
13	129	5	5	0
13	130	3	5	-2
13	131	7	6	1
13	132	6	7	-1
13	133	4	3	1
13	134	4	6	-2
13	135	6	6	0
13	136	1	1	0
13	137	3	7	-4
13	138	3	5	-2
13	139	1	1	0
13	140	6	5	1
13	141	7	2	5
13	142	5	4	1
13	143	3	5	-2
13	144	4	3	1
13	145	3	4	-1
13	146	9	6	3
13	147	3	3	0
13	148	3	2	1
13	149	5	3	2
13	150	5	3	2
13	151	3	4	-1
13	152	3	3	0
13	153	3	5	-2
13	154	1	6	-5
14	1	2	8	-6
14	2	4	6	-2
14	3	3	4	-1
14	4	6	4	2
14	5	6	3	3
14	6	3	2	1
14	7	5	6	-1
14	8	3	3	0
14	9	2	1	1
14	10	6	4	2
14	11	7	3	4
14	12	5	12	-7
14	13	6	3	3
14	14	4	10	-6
14	15	4	10	-6
14	16	7	5	2
14	17	1	4	-3
14	18	2	2	0
14	19	4	4	0
14	20	4	7	-3
14	21	2	7	-5
14	22	7	3	4
14	23	3	5	-2
14	24	3	8	-5
14	25	5	7	-2
14	26	5	9	-4
14	27	2	3	-1
14	28	2	3	-1
14	29	2	7	-5
14	30	5	8	-3
14	31	5	8	-3
14	32	8	6	2
14	33	6	4	2
14	34	1	4	-3
14	35	5	9	-4
14	36	3	5	-2
14	37	3	3	0
14	38	6	6	0
14	39	5	7	-2
14	40	2	4	-2
14	41	8	7	1
14	42	6	11	-5
14	43	6	4	2
14	44	2	1	1
14	45	3	9	-6
14	46	7	6	1
14	47	6	4	2
14	48	6	3	3
14	49	2	7	-5
14	50	3	3	0
14	51	3	4	-1
14	52	6	5	1
14	53	8	8	0
14	54	2	6	-4
14	55	5	3	2
14	56	5	4	1
14	57	2	1	1
14	58	3	4	-1
14	59	3	2	1
14	60	4	6	-2
14	61	6	7	-1
14	62	8	10	-2
14	63	6	7	-1
14	64	3	3	0
14	65	7	6	1
14	66	4	7	-3
14	67	5	5	0
14	68	1	1	0
14	69	4	6	-2
14	70	1	1	0
14	71	7	7	0
14	72	3	4	-1
14	73	5	6	-1
14	74	2	2	0
14	75	8	4	4
14	76	2	7	-5
14	77	5	8	-3
14	78	5	5	0
14	79	3	4	-1
15	1	4	6	-2
15	2	4	4	0
15	3	9	8	1
15	4	7	8	-1
15	5	5	9	-4
15	6	3	7	-4
15	7	4	2	2
15	8	4	2	2
15	9	2	5	-3
15	10	2	5	-3
15	11	5	4	1
15	12	1	7	-6
15	13	4	9	-5
15	14	2	4	-2
15	15	3	7	-4
15	16	1	6	-5
15	17	6	4	2
15	18	3	2	1
15	19	7	6	1
15	20	3	4	-1
15	21	4	3	1
15	22	5	3	2
15	23	1	2	-1
15	24	3	3	0
15	25	3	2	1
15	26	5	3	2
15	27	2	4	-2
15	28	6	5	1
15	29	3	4	-1
15	30	6	6	0
15	31	3	5	-2
15	32	2	1	1
15	33	3	6	-3
15	34	3	6	-3
15	35	2	6	-4
15	36	4	8	-4
15	37	5	5	0
15	38	3	4	-1
15	39	7	4	3
15	40	3	3	0
15	41	3	3	0
15	42	6	6	0
15	43	2	5	-3
15	44	3	3	0
15	45	5	9	-4
15	46	3	1	2
15	47	5	4	1
15	48	3	5	-2
15	49	0	0	0
15	50	2	1	1
15	51	6	8	-2
15	52	2	8	-6
15	53	7	8	-1
15	54	1	2	-1
15	55	6	8	-2
15	56	4	6	-2
15	57	4	8	-4
15	58	1	6	-5
15	59	4	4	0
15	60	5	9	-4
15	61	7	5	2
15	62	3	4	-1
15	63	8	5	3
15	64	6	7	-1
15	65	2	5	-3
15	66	2	4	-2
15	67	2	3	-1
15	68	0	1	-1
15	69	5	5	0
15	70	3	6	-3
15	71	4	3	1
15	72	7	7	0
15	73	6	6	0
15	74	1	4	-3
15	75	0	1	-1
15	76	5	4	1
15	77	4	3	1
15	78	7	10	-3
15	79	1	4	-3
15	80	5	5	0
15	81	2	4	-2
15	82	4	6	-2
15	83	3	4	-1
15	84	3	1	2
15	85	9	7	2
15	86	5	5	0
15	87	5	4	1
15	88	2	5	-3
15	89	3	4	-1
15	90	6	7	-1
15	91	4	3	1
15	92	3	5	-2
15	93	7	3	4
15	94	4	8	-4
15	95	2	4	-2
15	96	2	3	-1
15	97	2	2	0
15	98	5	4	1
15	99	2	8	-6
15	100	6	6	0
15	101	5	4	1
15	102	2	1	1
15	103	2	2	0
15	104	9	6	3
15	105	5	5	0
15	106	3	7	-4
15	107	2	2	0
15	108	9	8	1
15	109	5	6	-1
15	110	3	4	-1
15	111	4	6	-2
15	112	3	6	-3
15	113	4	6	-2
15	114	3	5	-2
15	115	4	4	0
15	116	2	2	0
15	117	5	5	0
15	118	4	8	-4
15	119	0	2	-2
15	120	7	10	-3
15	121	6	7	-1
15	122	6	2	4
15	123	1	2	-1
15	124	5	5	0
15	125	6	6	0
16	1	3	5	-2
16	2	3	2	1
16	3	4	5	-1
16	4	4	8	-4
16	5	1	2	-1
16	6	5	7	-2
16	7	4	9	-5
16	8	3	4	-1
16	9	2	5	-3
16	10	5	4	1
16	11	5	2	3
16	12	4	5	-1
16	13	4	5	-1
16	14	6	7	-1
16	15	4	4	0
16	16	4	2	2
16	17	5	2	3
16	18	4	4	0
16	19	6	4	2
16	20	4	5	-1
16	21	5	7	-2
16	22	4	4	0
16	23	5	4	1
16	24	1	4	-3
16	25	2	3	-1
16	26	2	4	-2
16	27	2	2	0
16	28	6	4	2
16	29	5	7	-2
[truncated: 257 more rows]
