# Supplementary material for: High-throughput automated methods for classical and operant conditioning of Drosophila larvae
Source: eLife. 2022 Oct 28;11:e70015. doi: 10.7554/eLife.70015 (PMC9678368; doi:10.7554/eLife.70015)
Supplement: Figure 4—source data 2. [file elife-70015-fig4-data2.xlsx]

## Sheet: Ddc > CsChr
timeBin	larva	nBendStim	nBendUnstim	bendDiff
1	1	2	7	-5
1	2	10	0	10
1	3	4	5	-1
1	4	3	7	-4
1	5	5	7	-2
1	6	4	4	0
1	7	4	8	-4
1	8	6	8	-2
1	9	7	7	0
1	10	7	6	1
1	11	5	4	1
1	12	8	8	0
1	13	4	2	2
1	14	10	5	5
1	15	2	3	-1
1	16	6	3	3
1	17	3	4	-1
1	18	3	4	-1
1	19	8	4	4
1	20	4	7	-3
1	21	6	9	-3
1	22	5	9	-4
1	23	8	8	0
1	24	8	8	0
1	25	11	5	6
1	26	8	6	2
1	27	5	5	0
1	28	10	5	5
1	29	10	2	8
1	30	3	1	2
1	31	7	8	-1
1	32	7	6	1
1	33	2	7	-5
1	34	6	4	2
1	35	2	4	-2
1	36	6	1	5
1	37	4	3	1
1	38	6	9	-3
1	39	6	6	0
1	40	3	6	-3
1	41	6	9	-3
1	42	6	9	-3
1	43	3	4	-1
1	44	8	7	1
1	45	6	5	1
1	46	9	8	1
1	47	7	5	2
1	48	4	5	-1
1	49	6	2	4
1	50	7	8	-1
1	51	3	4	-1
1	52	6	3	3
1	53	8	7	1
1	54	8	5	3
1	55	4	7	-3
1	56	5	7	-2
1	57	4	6	-2
1	58	5	5	0
1	59	6	7	-1
1	60	7	7	0
1	61	7	1	6
1	62	4	7	-3
1	63	1	10	-9
1	64	5	9	-4
1	65	9	0	9
1	66	5	5	0
1	67	5	1	4
1	68	4	3	1
1	69	4	7	-3
1	70	2	5	-3
1	71	5	4	1
1	72	1	6	-5
1	73	4	8	-4
1	74	6	7	-1
1	75	5	4	1
1	76	5	3	2
1	77	6	4	2
1	78	4	10	-6
1	79	4	6	-2
1	80	8	8	0
1	81	8	9	-1
1	82	10	5	5
1	83	7	6	1
1	84	5	3	2
1	85	3	2	1
1	86	5	12	-7
1	87	6	6	0
1	88	4	3	1
1	89	5	3	2
1	90	7	5	2
1	91	4	4	0
1	92	3	7	-4
1	93	4	8	-4
1	94	5	9	-4
1	95	7	5	2
1	96	1	1	0
1	97	7	6	1
1	98	4	2	2
1	99	16	4	12
1	100	3	3	0
1	101	5	8	-3
1	102	1	6	-5
1	103	5	5	0
1	104	3	8	-5
1	105	7	6	1
1	106	6	7	-1
1	107	7	6	1
1	108	6	5	1
1	109	3	6	-3
11	1	6	6	0
11	2	8	0	8
11	3	2	0	2
11	4	4	4	0
11	5	5	8	-3
11	6	6	1	5
11	7	5	7	-2
11	8	9	3	6
11	9	3	1	2
11	10	8	5	3
11	11	2	3	-1
11	12	6	1	5
11	13	5	4	1
11	14	2	1	1
11	15	7	10	-3
11	16	7	5	2
11	17	2	3	-1
11	18	4	4	0
11	19	7	3	4
11	20	1	3	-2
11	21	4	7	-3
11	22	7	6	1
11	23	8	12	-4
11	24	6	10	-4
11	25	11	6	5
11	26	8	7	1
11	27	9	5	4
11	28	10	2	8
11	29	8	6	2
11	30	5	4	1
11	31	10	9	1
11	32	11	9	2
11	33	4	13	-9
11	34	7	5	2
11	35	9	5	4
11	36	5	3	2
11	37	8	1	7
11	38	12	3	9
11	39	4	10	-6
11	40	9	3	6
11	41	3	7	-4
11	42	5	6	-1
11	43	5	7	-2
11	44	6	3	3
11	45	10	4	6
11	46	4	2	2
11	47	5	4	1
11	48	0	4	-4
11	49	7	0	7
11	50	3	4	-1
11	51	5	1	4
11	52	7	8	-1
11	53	6	6	0
11	54	6	2	4
11	55	2	3	-1
11	56	4	4	0
11	57	5	7	-2
11	58	6	3	3
11	59	1	1	0
11	60	6	4	2
11	61	4	1	3
11	62	4	4	0
11	63	1	7	-6
11	64	3	5	-2
11	65	7	3	4
11	66	1	6	-5
11	67	6	1	5
11	68	10	2	8
11	69	4	9	-5
11	70	5	3	2
11	71	4	1	3
11	72	1	1	0
11	73	2	8	-6
11	74	5	8	-3
11	75	6	6	0
11	76	3	2	1
11	77	6	3	3
11	78	4	9	-5
11	79	12	5	7
11	80	9	6	3
11	81	10	5	5
11	82	3	4	-1
11	83	6	6	0
11	84	9	7	2
11	85	6	6	0
11	86	6	8	-2
11	87	13	7	6
11	88	7	6	1
11	89	7	6	1
11	90	9	4	5
11	91	5	3	2
11	92	3	4	-1
11	93	4	2	2
11	94	5	5	0
11	95	7	3	4
11	96	3	3	0
11	97	7	5	2
11	98	8	3	5
11	99	12	3	9
11	100	6	6	0
11	101	4	7	-3
11	102	5	5	0
11	103	6	5	1
11	104	6	5	1
11	105	6	5	1
11	106	4	4	0
11	107	5	11	-6
11	108	5	9	-4
11	109	5	1	4

## Sheet: CsChr Control
timeBin	larva	nBendStim	nBendUnstim	bendDiff
1	1	4	6	-2
1	2	4	10	-6
1	3	7	7	0
1	4	5	7	-2
1	5	9	8	1
1	6	5	6	-1
1	7	6	3	3
1	8	7	6	1
1	9	8	5	3
1	10	5	5	0
1	11	7	7	0
1	12	2	5	-3
1	13	1	5	-4
1	14	4	3	1
1	15	8	4	4
1	16	5	3	2
1	17	6	8	-2
1	18	8	6	2
1	19	6	5	1
1	20	5	8	-3
1	21	7	6	1
1	22	1	4	-3
1	23	6	2	4
1	24	3	6	-3
1	25	5	5	0
1	26	4	2	2
1	27	5	3	2
1	28	8	5	3
1	29	7	7	0
1	30	4	8	-4
1	31	2	5	-3
1	32	6	4	2
1	33	3	8	-5
1	34	7	8	-1
1	35	6	8	-2
1	36	8	6	2
1	37	3	4	-1
1	38	3	1	2
1	39	8	7	1
1	40	6	11	-5
1	41	4	3	1
1	42	5	6	-1
1	43	3	6	-3
1	44	6	7	-1
1	45	9	3	6
1	46	6	6	0
1	47	3	5	-2
1	48	4	2	2
1	49	3	4	-1
1	50	4	5	-1
1	51	6	3	3
1	52	4	4	0
1	53	8	7	1
1	54	6	5	1
1	55	4	6	-2
1	56	5	9	-4
1	57	3	4	-1
1	58	4	3	1
1	59	4	3	1
1	60	7	6	1
1	61	5	4	1
1	62	2	4	-2
1	63	5	5	0
1	64	5	5	0
1	65	8	4	4
1	66	5	4	1
1	67	7	6	1
1	68	6	4	2
1	69	3	3	0
1	70	6	7	-1
1	71	5	5	0
1	72	2	4	-2
1	73	5	5	0
1	74	4	9	-5
1	75	9	5	4
1	76	7	5	2
1	77	7	5	2
1	78	3	9	-6
1	79	4	4	0
1	80	6	4	2
1	81	5	4	1
1	82	5	3	2
1	83	4	4	0
1	84	2	4	-2
1	85	5	4	1
1	86	6	5	1
1	87	6	6	0
1	88	6	3	3
1	89	7	6	1
1	90	7	4	3
1	91	8	4	4
1	92	6	7	-1
1	93	6	2	4
1	94	2	3	-1
11	1	4	2	2
11	2	6	8	-2
11	3	4	3	1
11	4	4	6	-2
11	5	9	10	-1
11	6	5	10	-5
11	7	3	6	-3
11	8	5	4	1
11	9	4	5	-1
11	10	4	2	2
11	11	3	5	-2
11	12	5	4	1
11	13	2	3	-1
11	14	2	7	-5
11	15	6	4	2
11	16	4	3	1
11	17	1	8	-7
11	18	4	3	1
11	19	7	3	4
11	20	5	7	-2
11	21	1	5	-4
11	22	1	1	0
11	23	4	0	4
11	24	4	4	0
11	25	4	3	1
11	26	6	2	4
11	27	7	2	5
11	28	9	1	8
11	29	3	6	-3
11	30	6	7	-1
11	31	4	5	-1
11	32	3	1	2
11	33	1	3	-2
11	34	3	4	-1
11	35	6	3	3
11	36	3	2	1
11	37	3	6	-3
11	38	4	2	2
11	39	7	2	5
11	40	4	6	-2
11	41	5	5	0
11	42	4	3	1
11	43	4	5	-1
11	44	6	3	3
11	45	9	3	6
11	46	6	3	3
11	47	3	3	0
11	48	2	2	0
11	49	4	4	0
11	50	4	7	-3
11	51	6	4	2
11	52	6	5	1
11	53	3	4	-1
11	54	4	6	-2
11	55	6	5	1
11	56	3	7	-4
11	57	6	5	1
11	58	6	3	3
11	59	6	6	0
11	60	5	2	3
11	61	7	3	4
11	62	3	6	-3
11	63	1	4	-3
11	64	2	4	-2
11	65	6	3	3
11	66	4	2	2
11	67	3	4	-1
11	68	4	3	1
11	69	1	5	-4
11	70	6	7	-1
11	71	4	3	1
11	72	8	3	5
11	73	5	3	2
11	74	2	11	-9
11	75	3	3	0
11	76	5	4	1
11	77	4	5	-1
11	78	6	5	1
11	79	3	2	1
11	80	7	6	1
11	81	3	4	-1
11	82	5	7	-2
11	83	5	6	-1
11	84	4	6	-2
11	85	11	6	5
11	86	1	4	-3
11	87	5	5	0
11	88	2	4	-2
11	89	3	6	-3
11	90	4	4	0
11	91	7	5	2
11	92	6	6	0
11	93	4	6	-2
11	94	7	2	5
