# Supplementary material for: High-throughput automated methods for classical and operant conditioning of Drosophila larvae
Source: eLife. 2022 Oct 28;11:e70015. doi: 10.7554/eLife.70015 (PMC9678368; doi:10.7554/eLife.70015)
Supplement: Figure 5—source data 1. [file elife-70015-fig5-data1.xlsx]

## Sheet: TH > CsChr
timeBin	larva	nBendStim	nBendUnstim	bendDiff
1	1	3	6	-3
1	2	4	5	-1
1	3	7	8	-1
1	4	5	13	-8
1	5	8	7	1
1	6	5	4	1
1	7	4	0	4
1	8	7	8	-1
1	9	3	6	-3
1	10	8	8	0
1	11	6	10	-4
1	12	6	5	1
1	13	4	7	-3
1	14	1	4	-3
1	15	4	5	-1
1	16	4	4	0
1	17	7	7	0
1	18	6	11	-5
1	19	7	5	2
1	20	3	9	-6
1	21	2	7	-5
1	22	5	2	3
1	23	5	3	2
1	24	3	6	-3
1	25	5	0	5
1	26	7	8	-1
1	27	6	5	1
1	28	5	4	1
1	29	8	8	0
1	30	6	7	-1
1	31	2	7	-5
1	32	7	3	4
1	33	8	4	4
1	34	4	4	0
1	35	9	3	6
1	36	5	7	-2
1	37	5	5	0
1	38	3	10	-7
1	39	8	9	-1
1	40	6	4	2
1	41	8	5	3
1	42	6	5	1
1	43	6	5	1
1	44	5	1	4
1	45	7	5	2
1	46	4	4	0
1	47	6	9	-3
1	48	6	6	0
1	49	8	4	4
1	50	7	8	-1
1	51	3	5	-2
1	52	3	2	1
1	53	4	4	0
1	54	5	3	2
1	55	3	6	-3
1	56	6	2	4
1	57	3	6	-3
1	58	7	5	2
1	59	5	8	-3
1	60	5	6	-1
1	61	7	6	1
1	62	5	7	-2
1	63	6	10	-4
1	64	5	5	0
1	65	4	11	-7
1	66	4	4	0
1	67	1	3	-2
1	68	10	9	1
1	69	9	7	2
1	70	9	1	8
1	71	0	7	-7
1	72	4	7	-3
1	73	4	5	-1
1	74	5	5	0
1	75	6	9	-3
17	1	4	7	-3
17	2	7	5	2
17	3	3	6	-3
17	4	7	3	4
17	5	3	3	0
17	6	5	6	-1
17	7	9	4	5
17	8	2	5	-3
17	9	6	6	0
17	10	4	5	-1
17	11	11	7	4
17	12	4	2	2
17	13	6	4	2
17	14	5	7	-2
17	15	6	6	0
17	16	5	2	3
17	17	4	2	2
17	18	2	3	-1
17	19	4	3	1
17	20	3	5	-2
17	21	1	2	-1
17	22	3	5	-2
17	23	6	3	3
17	24	3	5	-2
17	25	4	6	-2
17	26	4	5	-1
17	27	3	4	-1
17	28	3	5	-2
17	29	5	3	2
17	30	5	1	4
17	31	10	9	1
17	32	3	1	2
17	33	0	1	-1
17	34	3	3	0
17	35	6	2	4
17	36	2	6	-4
17	37	6	3	3
17	38	5	2	3
17	39	1	3	-2
17	40	5	3	2
17	41	4	4	0
17	42	4	8	-4
17	43	11	5	6
17	44	8	5	3
17	45	5	7	-2
17	46	3	2	1
17	47	7	7	0
17	48	1	1	0
17	49	9	5	4
17	50	1	1	0
17	51	0	1	-1
17	52	4	4	0
17	53	5	3	2
17	54	3	7	-4
17	55	4	3	1
17	56	3	3	0
17	57	8	4	4
17	58	4	3	1
17	59	8	4	4
17	60	3	8	-5
17	61	7	2	5
17	62	7	3	4
17	63	0	2	-2
17	64	2	1	1
17	65	3	5	-2
17	66	3	3	0
17	67	4	3	1
17	68	6	3	3
17	69	5	5	0
17	70	7	7	0
17	71	6	3	3
17	72	6	6	0
17	73	3	4	-1
17	74	2	2	0
17	75	9	4	5
17	76	4	3	1
17	77	6	4	2
17	78	4	4	0
17	79	3	7	-4
17	80	4	5	-1
17	81	5	6	-1
17	82	3	5	-2
17	83	4	2	2
17	84	3	0	3
17	85	3	4	-1
17	86	4	4	0
17	87	3	4	-1
17	88	6	8	-2
17	89	2	7	-5
17	90	4	6	-2
17	91	5	5	0
17	92	5	3	2
17	93	9	6	3
17	94	1	1	0
17	95	5	1	4
17	96	4	5	-1
17	97	7	3	4
17	98	6	4	2
17	99	6	3	3
17	100	2	5	-3
17	101	4	5	-1
17	102	1	2	-1
17	103	2	0	2
17	104	1	5	-4
17	105	6	3	3
17	106	5	3	2
17	107	1	3	-2
17	108	2	4	-2
17	109	3	5	-2
17	110	4	1	3
17	111	6	3	3
17	112	3	3	0
17	113	8	5	3
17	114	6	4	2
17	115	5	4	1
17	116	1	1	0
17	117	7	6	1
17	118	3	5	-2
17	119	5	8	-3
17	120	2	2	0
17	121	6	5	1
17	122	3	2	1

## Sheet: Tph > CsChr
timeBin	larva	nBendStim	nBendUnstim	bendDiff
1	1	6	5	1
1	2	3	4	-1
1	3	5	5	0
1	4	2	7	-5
1	5	10	10	0
1	6	3	9	-6
1	7	7	4	3
1	8	1	1	0
1	9	6	4	2
1	10	3	2	1
1	11	2	4	-2
1	12	5	4	1
1	13	1	3	-2
1	14	7	6	1
1	15	10	5	5
1	16	0	3	-3
1	17	3	2	1
1	18	9	9	0
1	19	0	1	-1
1	20	2	5	-3
1	21	10	7	3
1	22	7	10	-3
1	23	12	5	7
1	24	23	3	20
1	25	2	7	-5
1	26	1	0	1
1	27	2	3	-1
1	28	7	2	5
1	29	8	4	4
1	30	3	2	1
1	31	3	7	-4
1	32	9	8	1
1	33	5	4	1
1	34	0	2	-2
1	35	7	9	-2
1	36	7	6	1
1	37	5	3	2
1	38	8	6	2
1	39	5	4	1
1	40	7	9	-2
1	41	4	1	3
1	42	1	2	-1
1	43	2	2	0
1	44	5	7	-2
1	45	3	2	1
1	46	3	1	2
1	47	5	3	2
1	48	4	5	-1
1	49	6	6	0
1	50	3	9	-6
1	51	6	1	5
1	52	4	10	-6
1	53	1	0	1
1	54	6	4	2
1	55	6	4	2
1	56	5	6	-1
1	57	0	3	-3
1	58	8	5	3
1	59	8	6	2
1	60	9	14	-5
1	61	6	10	-4
1	62	9	7	2
1	63	4	4	0
1	64	7	10	-3
1	65	5	7	-2
1	66	5	5	0
1	67	6	4	2
1	68	4	3	1
1	69	8	4	4
1	70	12	7	5
1	71	5	3	2
1	72	6	2	4
1	73	5	4	1
1	74	7	7	0
1	75	1	2	-1
1	76	8	6	2
1	77	3	4	-1
17	1	3	9	-6
17	2	1	0	1
17	3	0	0	0
17	4	5	5	0
17	5	4	2	2
17	6	4	4	0
17	7	2	3	-1
17	8	2	5	-3
17	9	7	2	5
17	10	5	2	3
17	11	3	0	3
17	12	5	2	3
17	13	0	5	-5
17	14	6	6	0
17	15	2	1	1
17	16	4	6	-2
17	17	4	4	0
17	18	7	4	3
17	19	4	3	1
17	20	3	4	-1
17	21	3	1	2
17	22	1	5	-4
17	23	3	1	2
17	24	1	1	0
17	25	2	1	1
17	26	2	2	0
17	27	8	4	4
17	28	8	4	4
17	29	1	2	-1
17	30	4	4	0
17	31	2	4	-2
17	32	7	4	3
17	33	4	3	1
17	34	4	6	-2
17	35	4	3	1
17	36	5	7	-2
17	37	8	9	-1
17	38	6	6	0
17	39	0	0	0
17	40	1	2	-1
17	41	4	3	1
17	42	2	1	1
17	43	3	8	-5
17	44	4	3	1
17	45	3	8	-5
17	46	6	4	2
17	47	3	1	2
17	48	4	1	3
17	49	3	2	1
17	50	3	1	2
17	51	5	5	0
17	52	4	2	2
17	53	2	1	1
17	54	1	1	0
17	55	4	2	2
17	56	5	3	2
17	57	8	8	0
17	58	6	6	0
17	59	5	4	1
17	60	11	7	4
17	61	2	3	-1
17	62	4	0	4
17	63	5	2	3
17	64	4	4	0
17	65	3	5	-2
17	66	6	5	1
17	67	4	3	1
17	68	4	3	1
17	69	5	1	4
17	70	7	1	6
17	71	2	5	-3
17	72	1	1	0
17	73	0	1	-1
17	74	3	4	-1
17	75	2	1	1
17	76	3	1	2
17	77	2	3	-1
17	78	1	3	-2
17	79	0	1	-1
17	80	3	1	2
17	81	4	0	4
17	82	2	1	1
17	83	4	7	-3
17	84	7	5	2
17	85	2	2	0
17	86	0	2	-2
17	87	2	0	2
17	88	6	6	0
17	89	4	2	2
17	90	2	2	0
17	91	8	5	3
17	92	2	3	-1
17	93	4	2	2
17	94	2	16	-14
17	95	1	2	-1
17	96	1	2	-1
17	97	4	1	3
17	98	4	2	2
17	99	4	3	1
17	100	6	2	4
17	101	4	2	2
17	102	5	3	2
17	103	2	3	-1
17	104	5	6	-1
17	105	10	7	3
17	106	2	3	-1
17	107	2	1	1
17	108	6	8	-2
17	109	2	2	0
17	110	4	4	0
17	111	2	2	0
17	112	3	6	-3
17	113	2	2	0
17	114	5	6	-1
17	115	2	3	-1
17	116	3	2	1
17	117	6	7	-1
17	118	4	4	0
17	119	4	6	-2
17	120	2	5	-3
17	121	2	0	2
17	122	4	4	0
17	123	3	1	2
17	124	8	4	4
17	125	2	1	1
17	126	1	2	-1

## Sheet: Tph > CsChr, tsh > Gal80
timeBin	larva	nBendStim	nBendUnstim	bendDiff
1	1	3	5	-2
1	2	2	0	2
1	3	3	1	2
1	4	4	1	3
1	5	1	4	-3
1	6	3	2	1
1	7	0	0	0
1	8	8	9	-1
1	9	1	0	1
1	10	3	4	-1
1	11	7	5	2
1	12	1	2	-1
1	13	7	11	-4
1	14	1	0	1
1	15	2	3	-1
1	16	4	7	-3
1	17	1	1	0
1	18	2	9	-7
1	19	2	7	-5
1	20	7	7	0
1	21	3	6	-3
1	22	2	6	-4
1	23	0	0	0
1	24	1	1	0
1	25	6	7	-1
1	26	7	6	1
1	27	7	4	3
1	28	2	2	0
1	29	2	5	-3
1	30	0	0	0
1	31	1	0	1
1	32	4	4	0
1	33	1	1	0
1	34	4	5	-1
1	35	6	8	-2
1	36	3	3	0
1	37	7	9	-2
1	38	4	2	2
1	39	1	8	-7
1	40	4	4	0
1	41	8	5	3
1	42	5	5	0
1	43	3	2	1
1	44	6	8	-2
1	45	4	9	-5
1	46	1	2	-1
1	47	4	3	1
1	48	9	5	4
1	49	0	0	0
1	50	0	2	-2
1	51	5	3	2
1	52	2	2	0
1	53	1	2	-1
1	54	2	1	1
1	55	1	2	-1
1	56	4	8	-4
1	57	3	1	2
1	58	0	0	0
1	59	5	6	-1
1	60	0	1	-1
1	61	5	9	-4
1	62	6	6	0
1	63	5	7	-2
1	64	5	10	-5
1	65	7	8	-1
1	66	7	6	1
1	67	0	2	-2
1	68	1	0	1
1	69	2	5	-3
1	70	9	4	5
1	71	3	5	-2
1	72	7	2	5
1	73	5	5	0
1	74	2	1	1
1	75	2	3	-1
1	76	7	4	3
17	1	0	2	-2
17	2	2	7	-5
17	3	0	6	-6
17	4	3	3	0
17	5	1	4	-3
17	6	0	1	-1
17	7	0	0	0
17	8	5	1	4
17	9	3	3	0
17	10	1	1	0
17	11	2	1	1
17	12	4	5	-1
17	13	3	1	2
17	14	0	0	0
17	15	2	1	1
17	16	3	2	1
17	17	3	3	0
17	18	1	2	-1
17	19	2	1	1
17	20	4	3	1
17	21	0	0	0
17	22	3	5	-2
17	23	1	0	1
17	24	0	2	-2
17	25	1	2	-1
17	26	0	0	0
17	27	1	0	1
17	28	2	3	-1
17	29	0	0	0
17	30	1	1	0
17	31	1	0	1
17	32	3	4	-1
17	33	7	4	3
17	34	0	1	-1
17	35	0	1	-1
17	36	2	1	1
17	37	3	5	-2
17	38	1	2	-1
17	39	1	1	0
17	40	2	4	-2
17	41	1	0	1
17	42	0	0	0
17	43	4	3	1
17	44	1	2	-1
17	45	1	1	0
17	46	2	1	1
17	47	0	0	0
17	48	1	2	-1
17	49	2	0	2
17	50	0	4	-4
17	51	1	1	0
17	52	3	3	0
17	53	5	3	2
17	54	6	1	5
17	55	5	5	0
17	56	2	1	1
17	57	1	4	-3
17	58	1	1	0
17	59	1	0	1
17	60	2	5	-3
17	61	4	2	2
17	62	4	6	-2
17	63	8	2	6
17	64	2	2	0
17	65	3	4	-1
17	66	1	1	0
17	67	1	0	1
17	68	2	1	1
17	69	1	0	1
17	70	1	1	0
17	71	0	4	-4
17	72	2	0	2
17	73	1	1	0
17	74	2	1	1
17	75	0	1	-1
17	76	4	5	-1
17	77	6	3	3
17	78	0	0	0
17	79	2	3	-1
17	80	2	1	1
17	81	4	3	1
17	82	2	0	2
17	83	2	3	-1
17	84	2	4	-2
17	85	3	2	1
17	86	5	4	1
17	87	2	0	2
17	88	0	1	-1
17	89	3	1	2
17	90	1	3	-2
17	91	0	0	0
17	92	1	1	0
17	93	4	5	-1
17	94	0	1	-1
17	95	3	3	0
17	96	2	4	-2
17	97	0	4	-4
17	98	2	4	-2
17	99	1	0	1
17	100	3	0	3
17	101	3	1	2
17	102	0	1	-1
17	103	0	0	0
17	104	2	4	-2
17	105	0	1	-1
17	106	3	5	-2
17	107	0	0	0
17	108	0	1	-1
17	109	0	1	-1
17	110	5	4	1
17	111	1	1	0
