# Supplementary material for: High-throughput automated methods for classical and operant conditioning of Drosophila larvae
Source: eLife journal article supplement (doi:10.7554/elife.70015), 2022-10-28
Supplement: supp [file elife-70015-supp-v1.zip]

**a**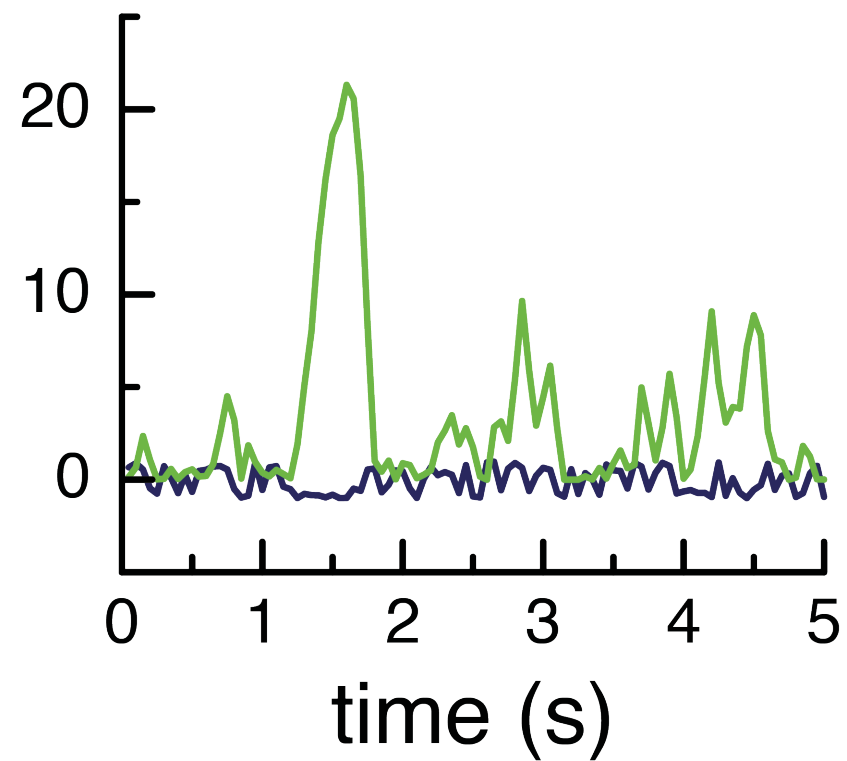

— asymmetry  
— asymmetry\_convolved\_squared

**b**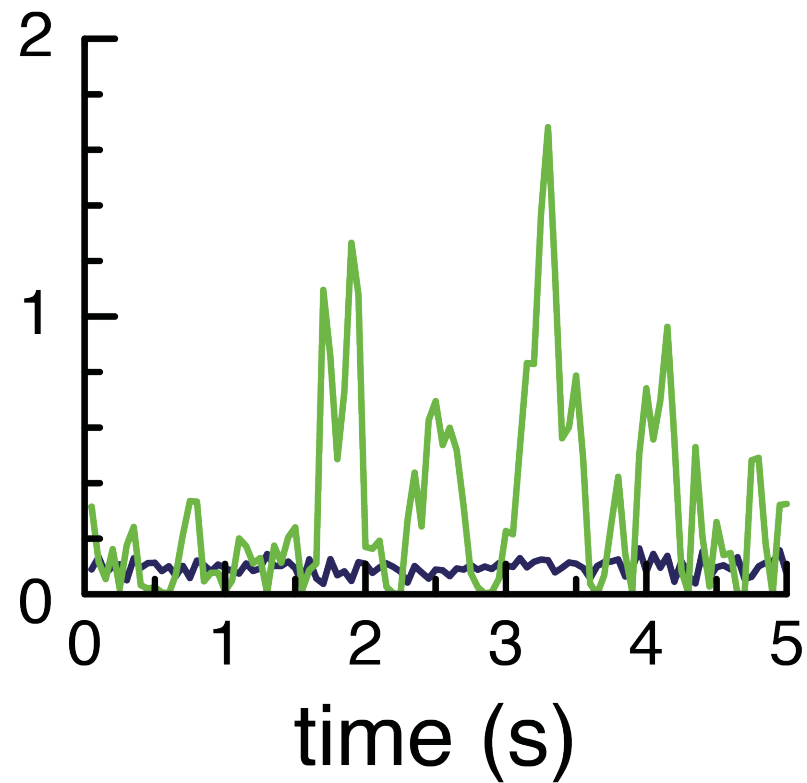

— eig\_reduced  
— eig\_reduced\_convolved\_squared

**c**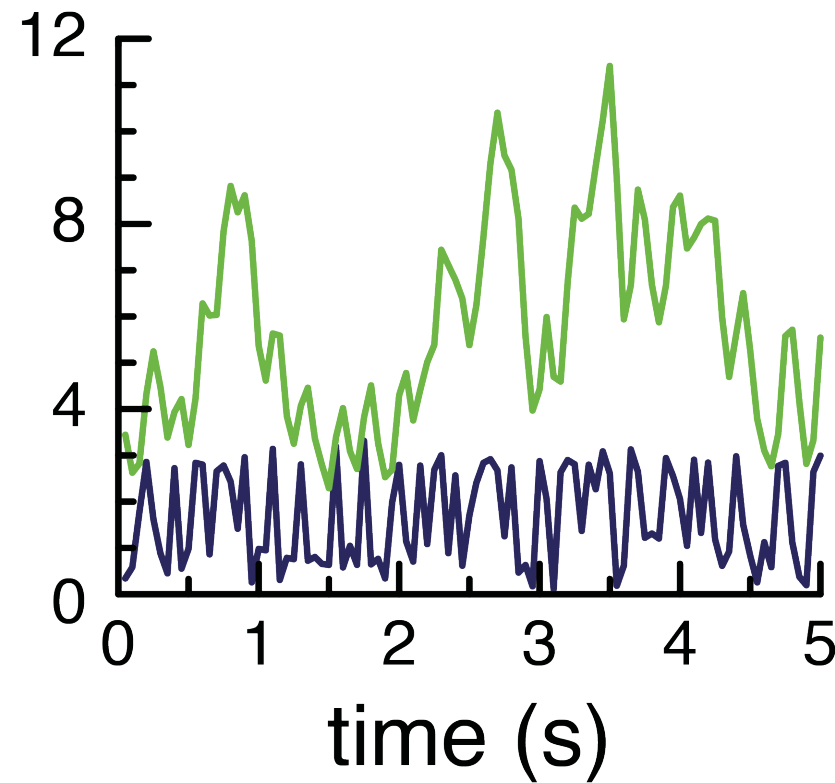

— v\_norm  
— v\_norm\_convolved\_squared
