# Supplementary material for: High-throughput automated methods for classical and operant conditioning of Drosophila larvae
Source: eLife journal article supplement (doi:10.7554/elife.70015), 2022-10-28
Supplement: supp [file T21 CAD BOM.xlsx]

## Sheet: Sheet1
							Item	Part #	Description	Quantity
							1	PBG11118	Optical Breadboard	1
							2	SOBL-300x300-850	IR Backlight	1
							3	XT66P1	66mm Rail Vertical Mounting Plate	2
							4	XT66-CUSTRAIL	1500 MM Custom Length 66 mm Rail	2
							5	GVS002	Dual Axis GALVO	4
							6	GCM102	GALVO Adapter	4
							7	XT66-CUSTRAIL	300 MM Custom Length 66 mm Rail	2
							8	XT66P2	Rail Carriage for 66 mm Rails	13
							9	XT66-CUSTRAIL	250 MM Custom Length 66 mm Rail	2
							10	FA-80-12M1H	Falcon2 12M Camera link Camera	1
							11	CEL5500-LED	DLI CEL5500 Light Engine with LED	1
							12	CEL5500-LG	DLI CEL5500 Light Engine with Light Guide	1
							13	AB90E	Right-Angle Bracket	4
							14	BA3	Mounting Base with Radial Through Slots	4
							15	AM8C	8° Angle Block	4
							16	AM4C	4° Angle Block	4
							17	P10	Ø1.5" Mounting Post	2
							18	C1511	Ø1.5" Post Mounting Clamp	2
							19	XT66C	Cross Clamp for 66 mm Rails	1
							20	XT66SP-500	66 mm Single Dovetail Rail, L = 500 mm	1
							21	LB2	Beam Block, 1 - 12 µm, 80 W Max Avg. Power	1
							22	PH4	Ø1/2" Post Holder, Spring-Loaded Hex-Locking Thumbscrew, L = 4"	2
							23	TR6	Ø1/2" Optical Post, SS, 8-32 Setscrew, 1/4"-20 Tap, L = 6"	2
							24	Nikon #1442	Nikon Micro-NIKKOR 55mm f/2.8 Lens	1
							25	Custom Sheet 1	IR transparent acrylic sheet bottom	1
							26	Custom Sheet 2	IR transparent acrylic sheet top	1
							27	Camera Adapter	Custom cut camera mount adapter	1
