# Supplementary figures and images for: High-throughput automated methods for classical and operant conditioning of Drosophila larvae
Source: eLife journal article supplement (doi:10.7554/elife.70015), 2022-10-28

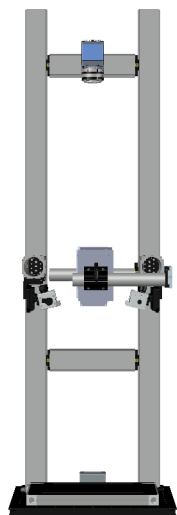

Supplement: supp [file elife-70015-supp-v1.zip]

**a**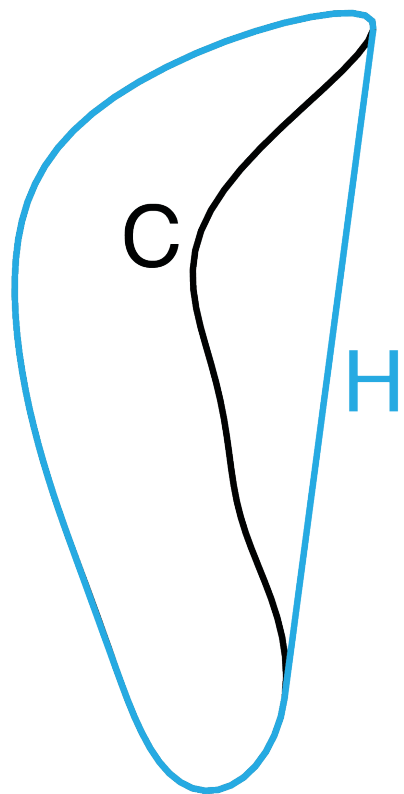**b**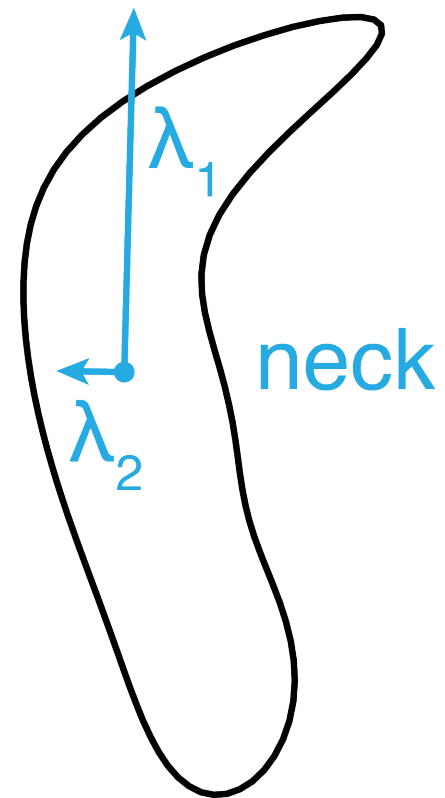**c**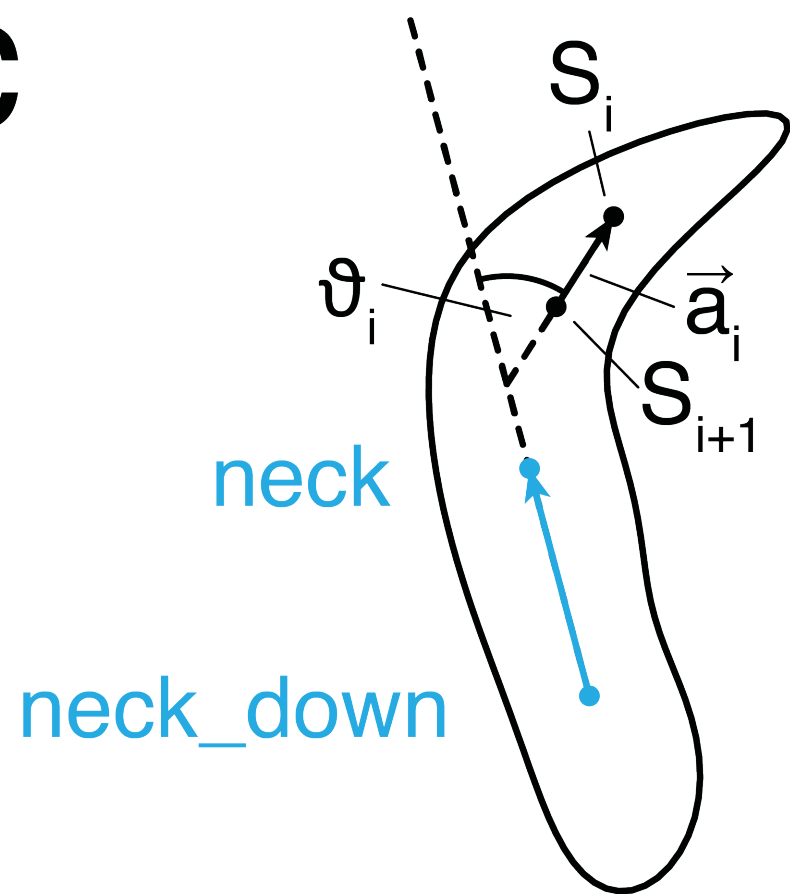**d**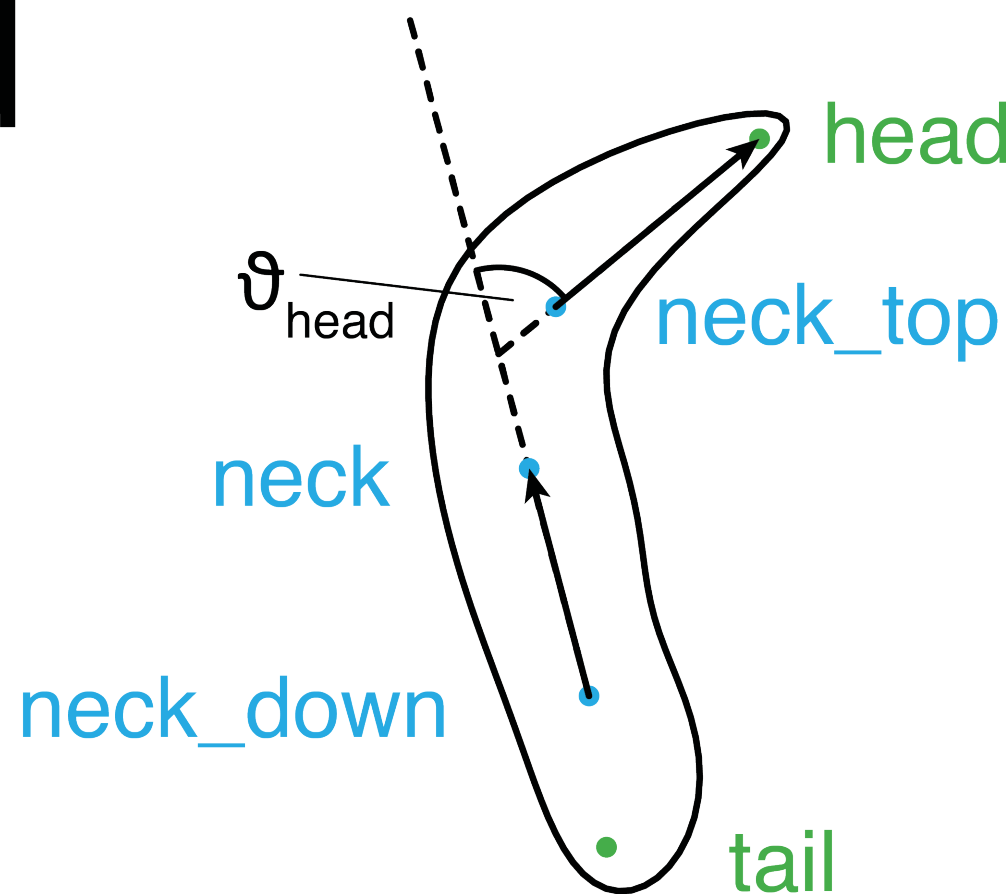

Supplement: supp [file elife-70015-supp-v1.zip]

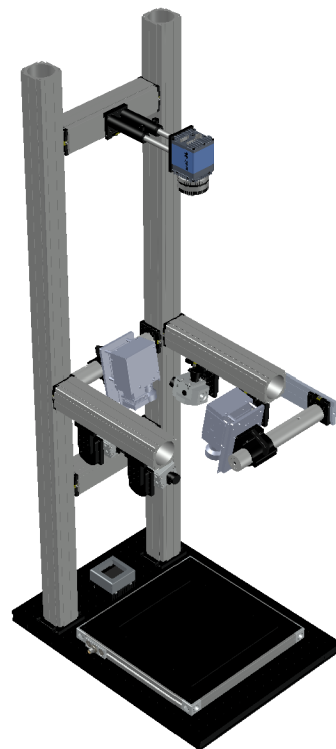

Supplement: supp [file elife-70015-supp-v1.zip]

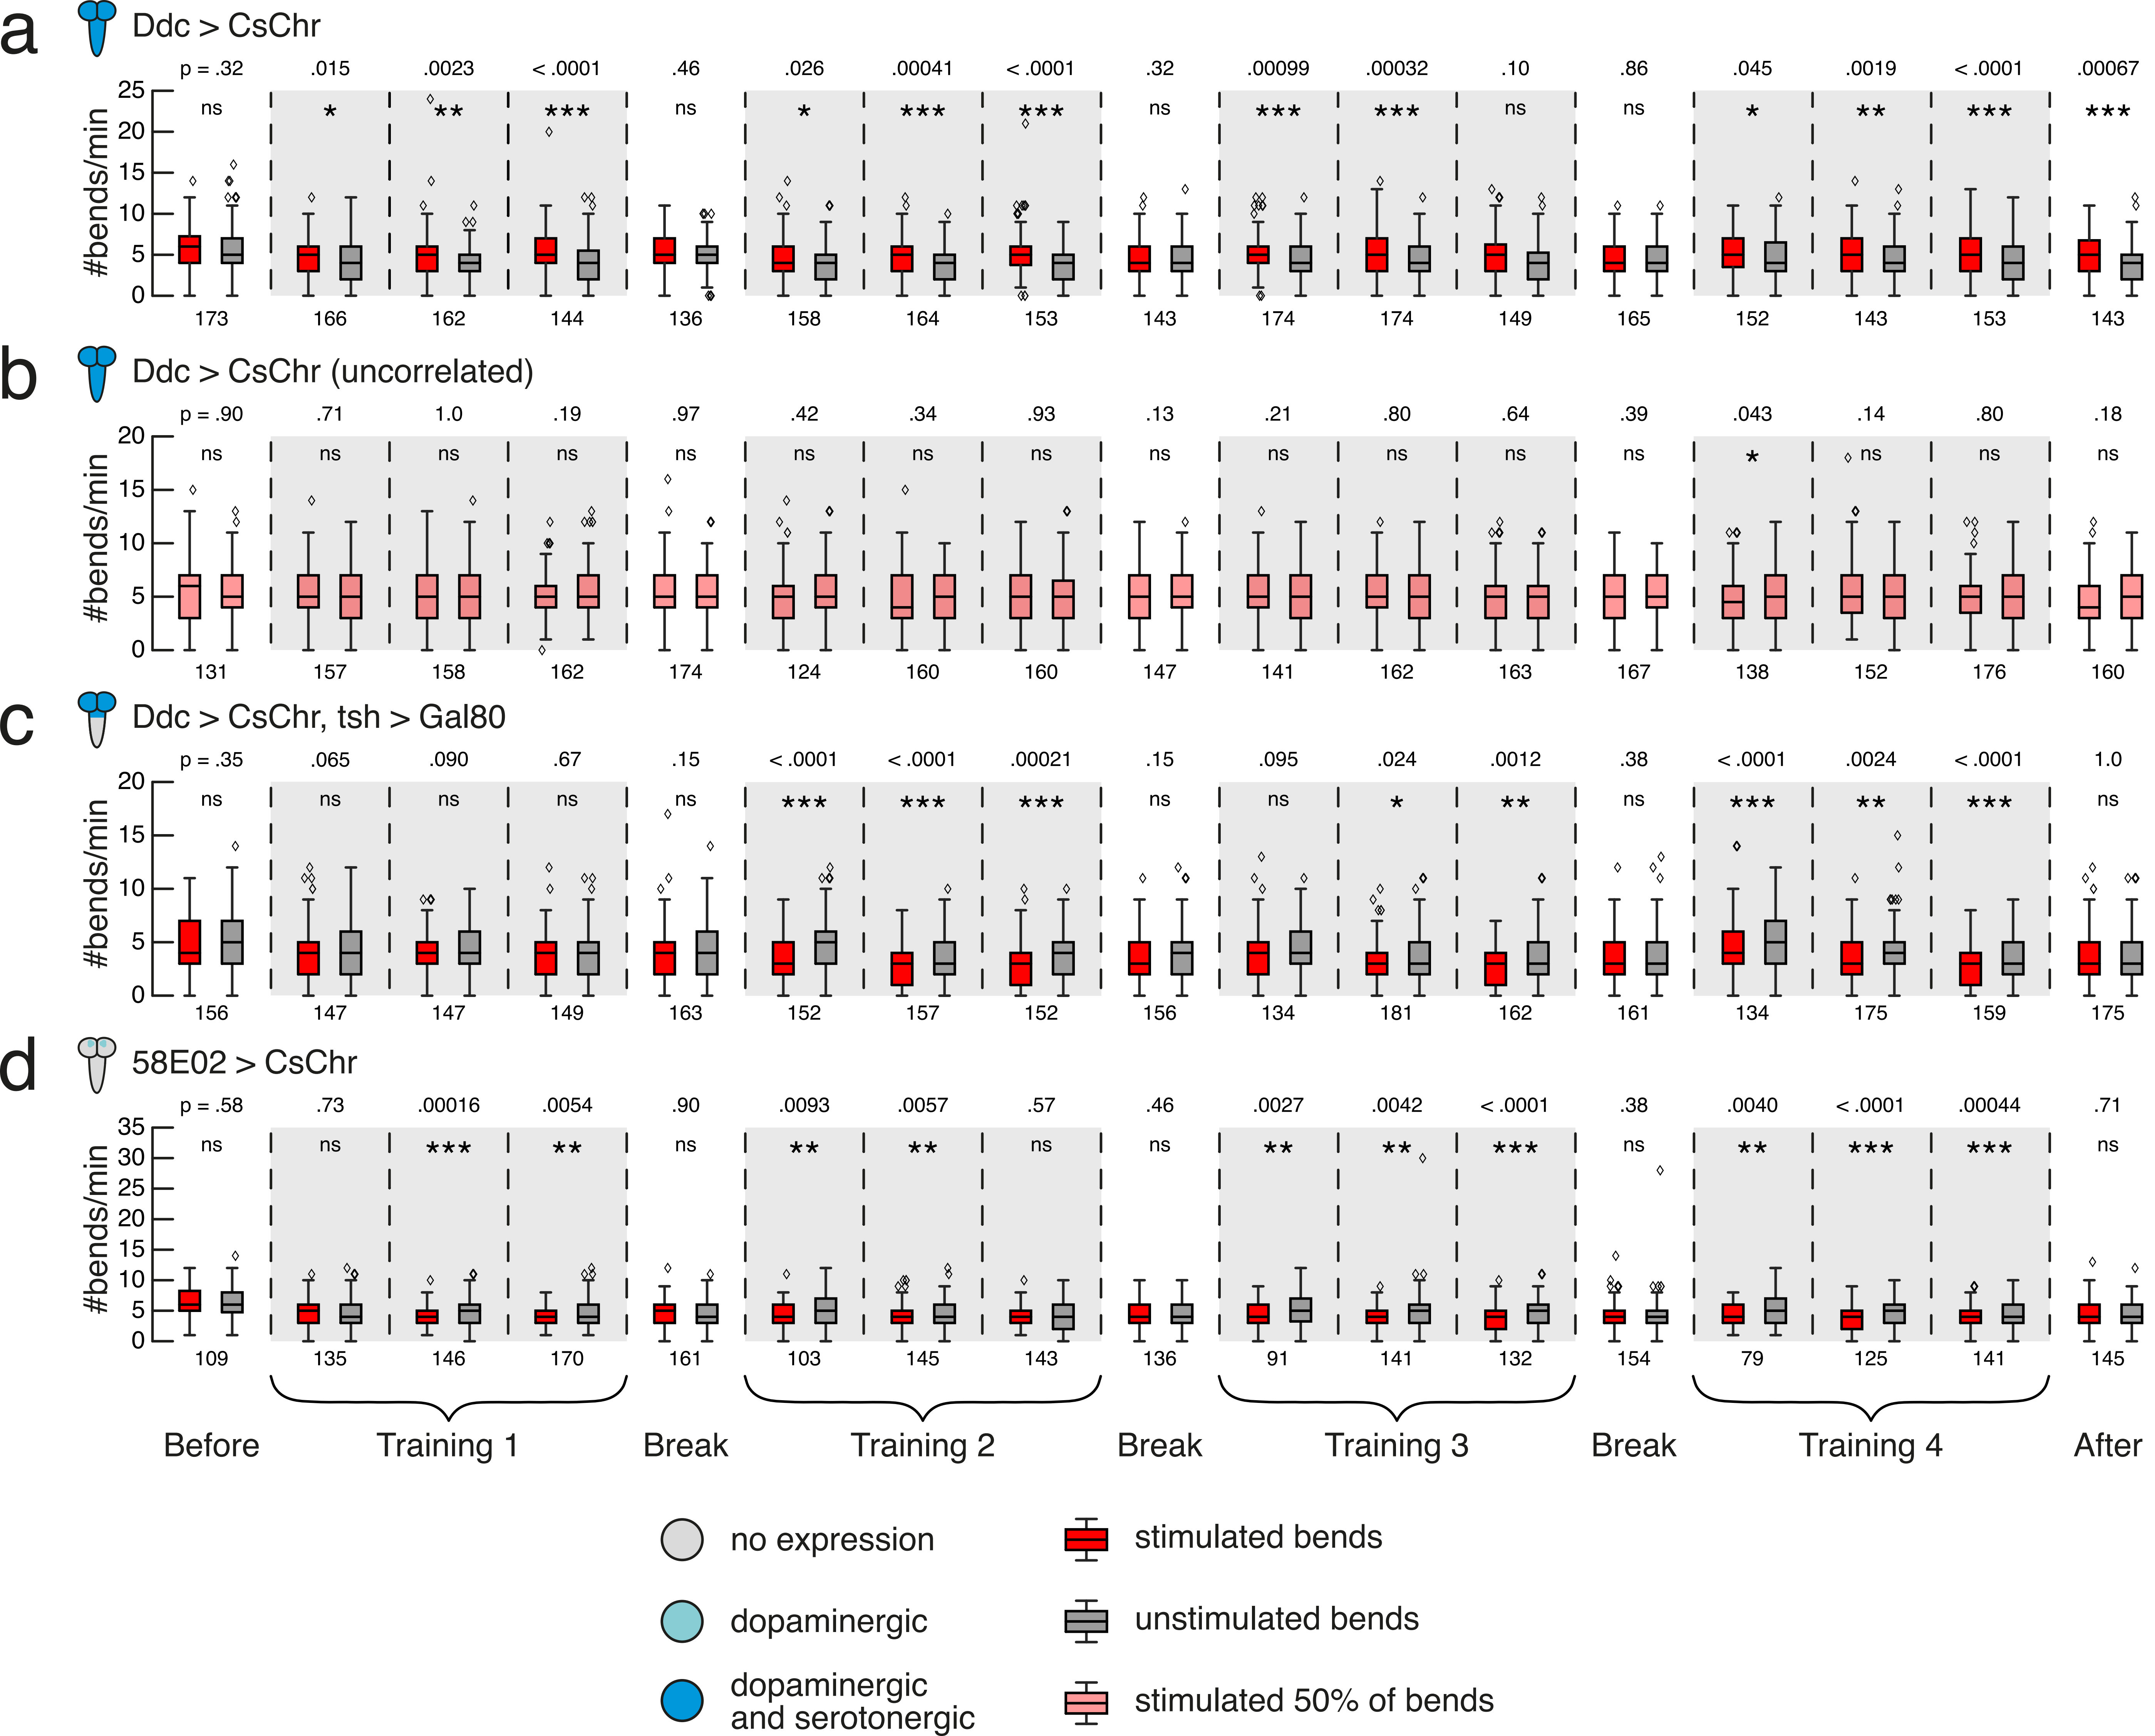

Supplement: supp [file elife-70015-supp-v1.zip]

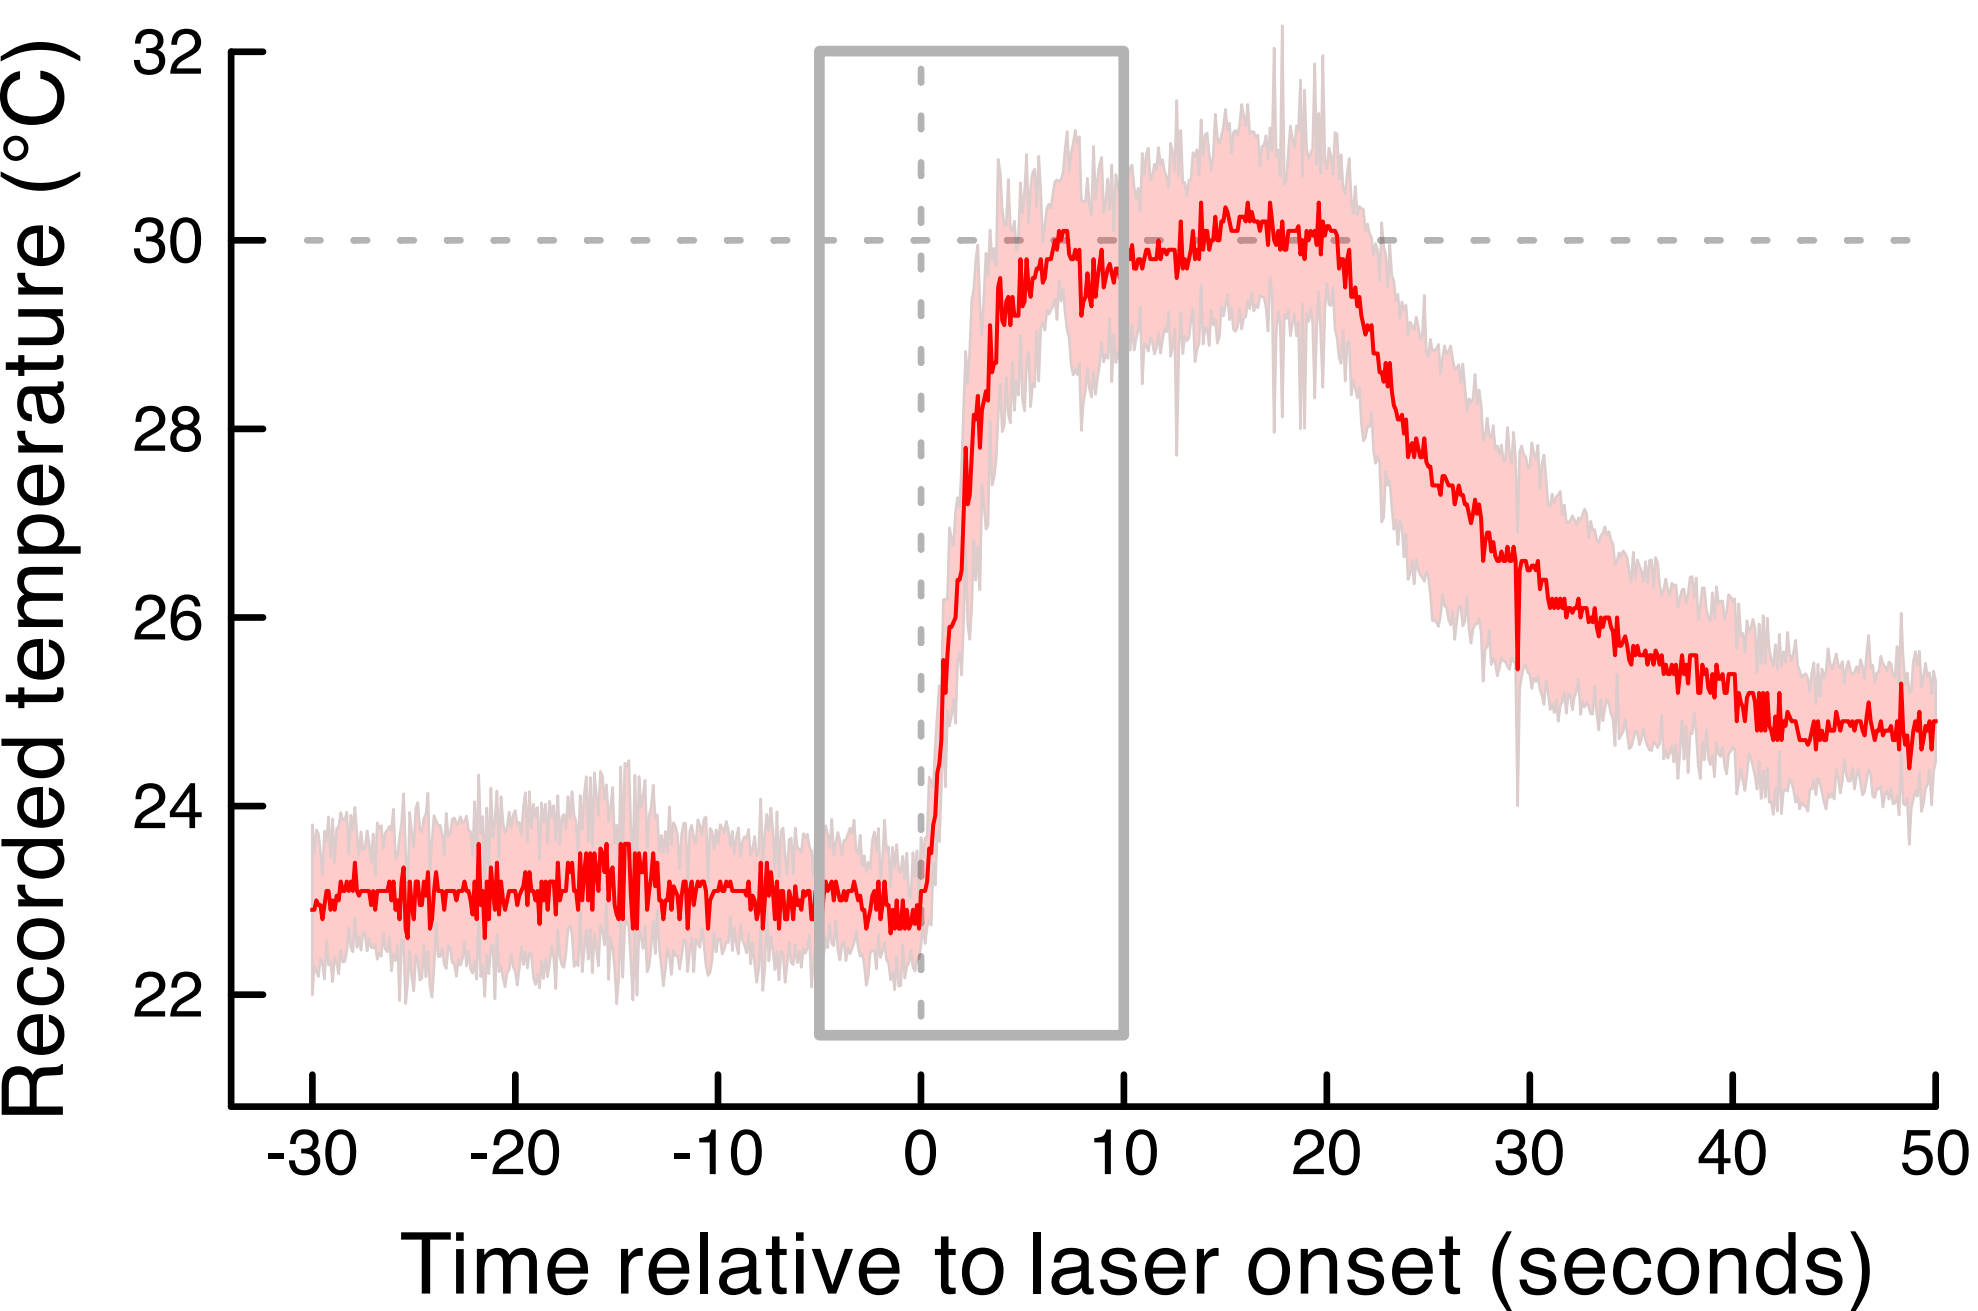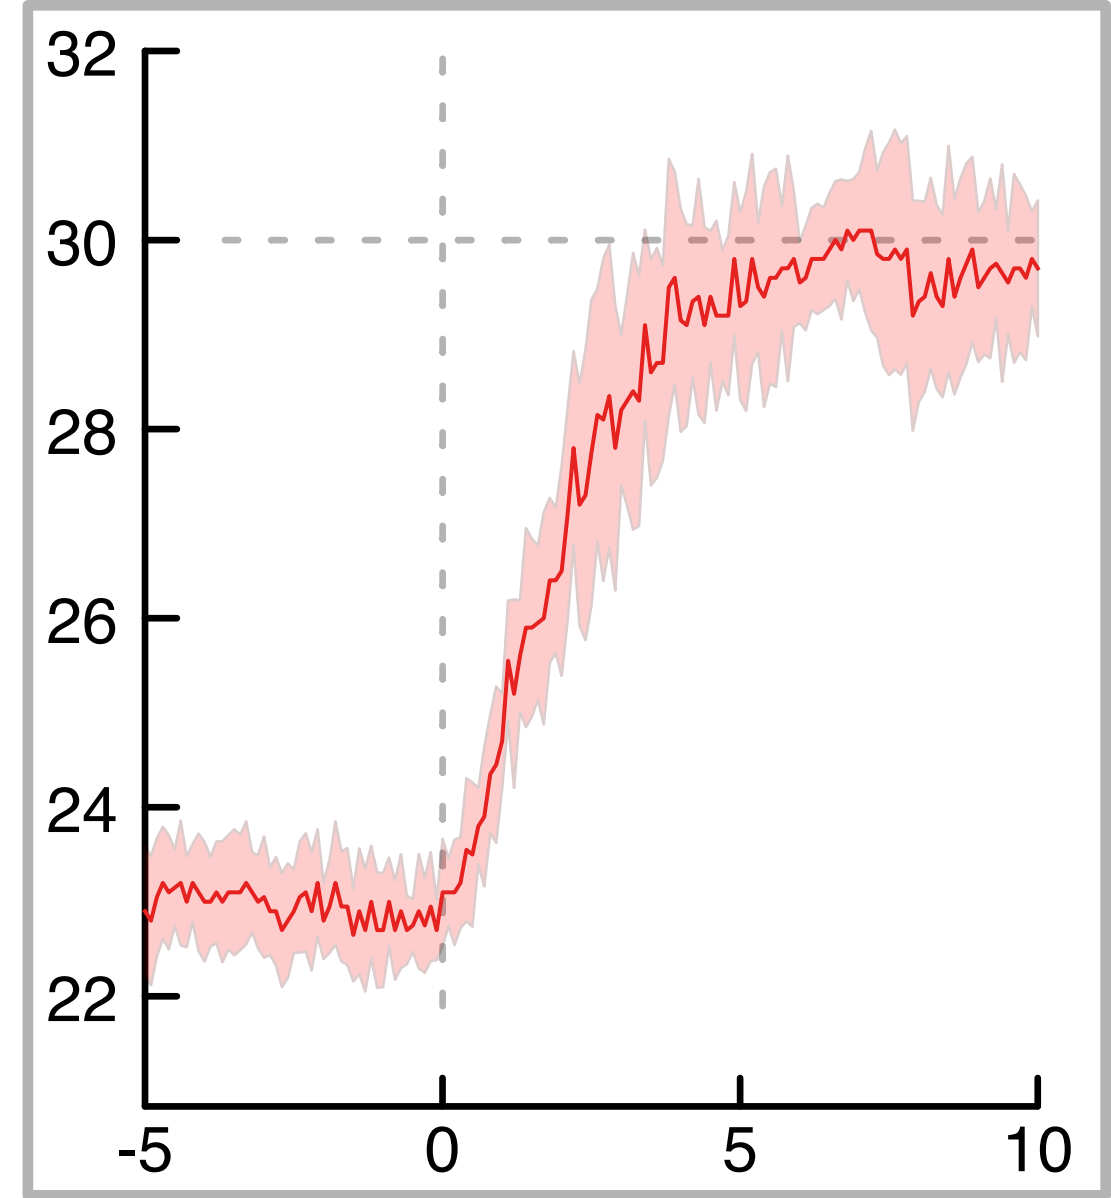

Supplement: supp [file elife-70015-supp-v1.zip]

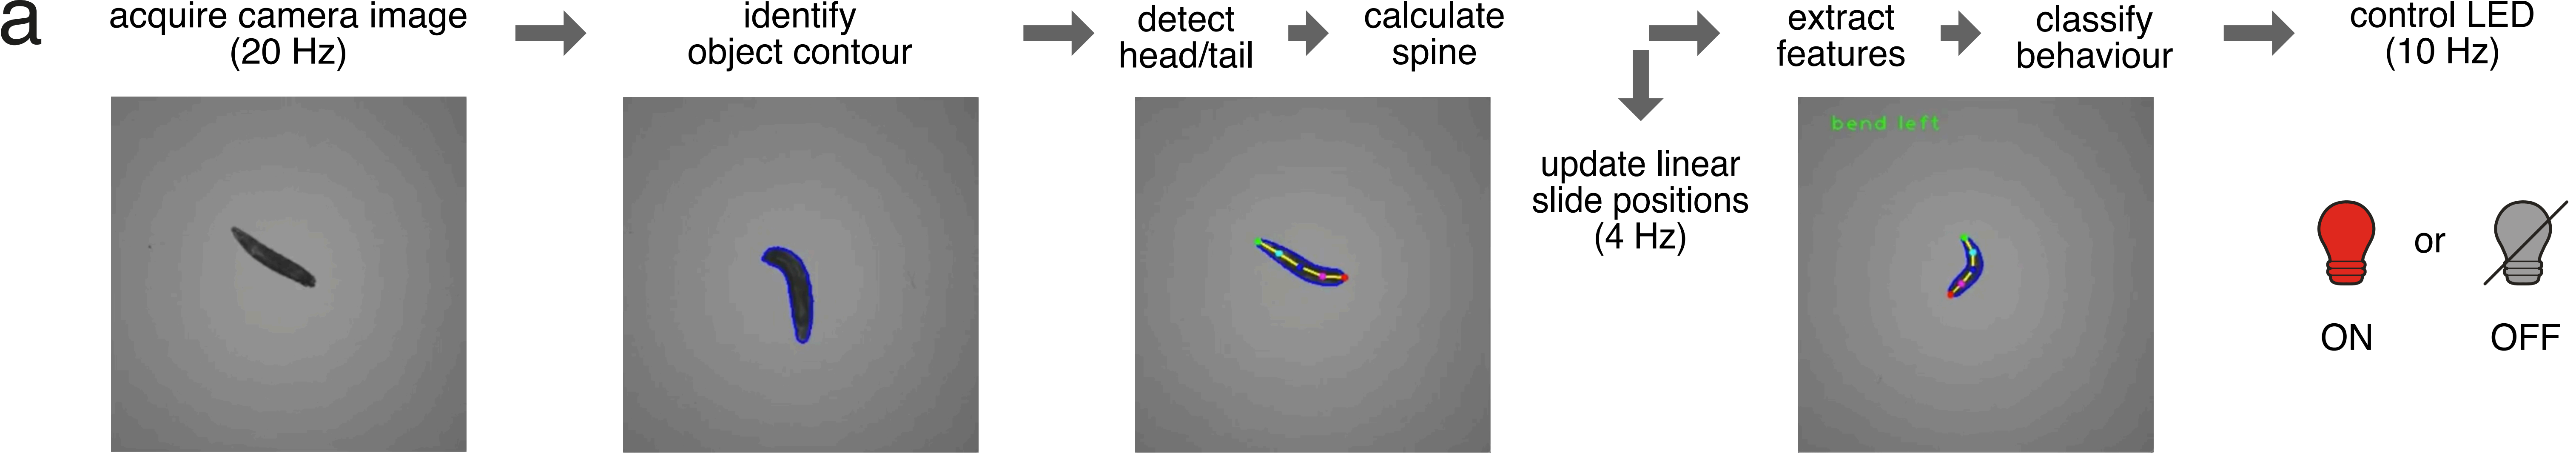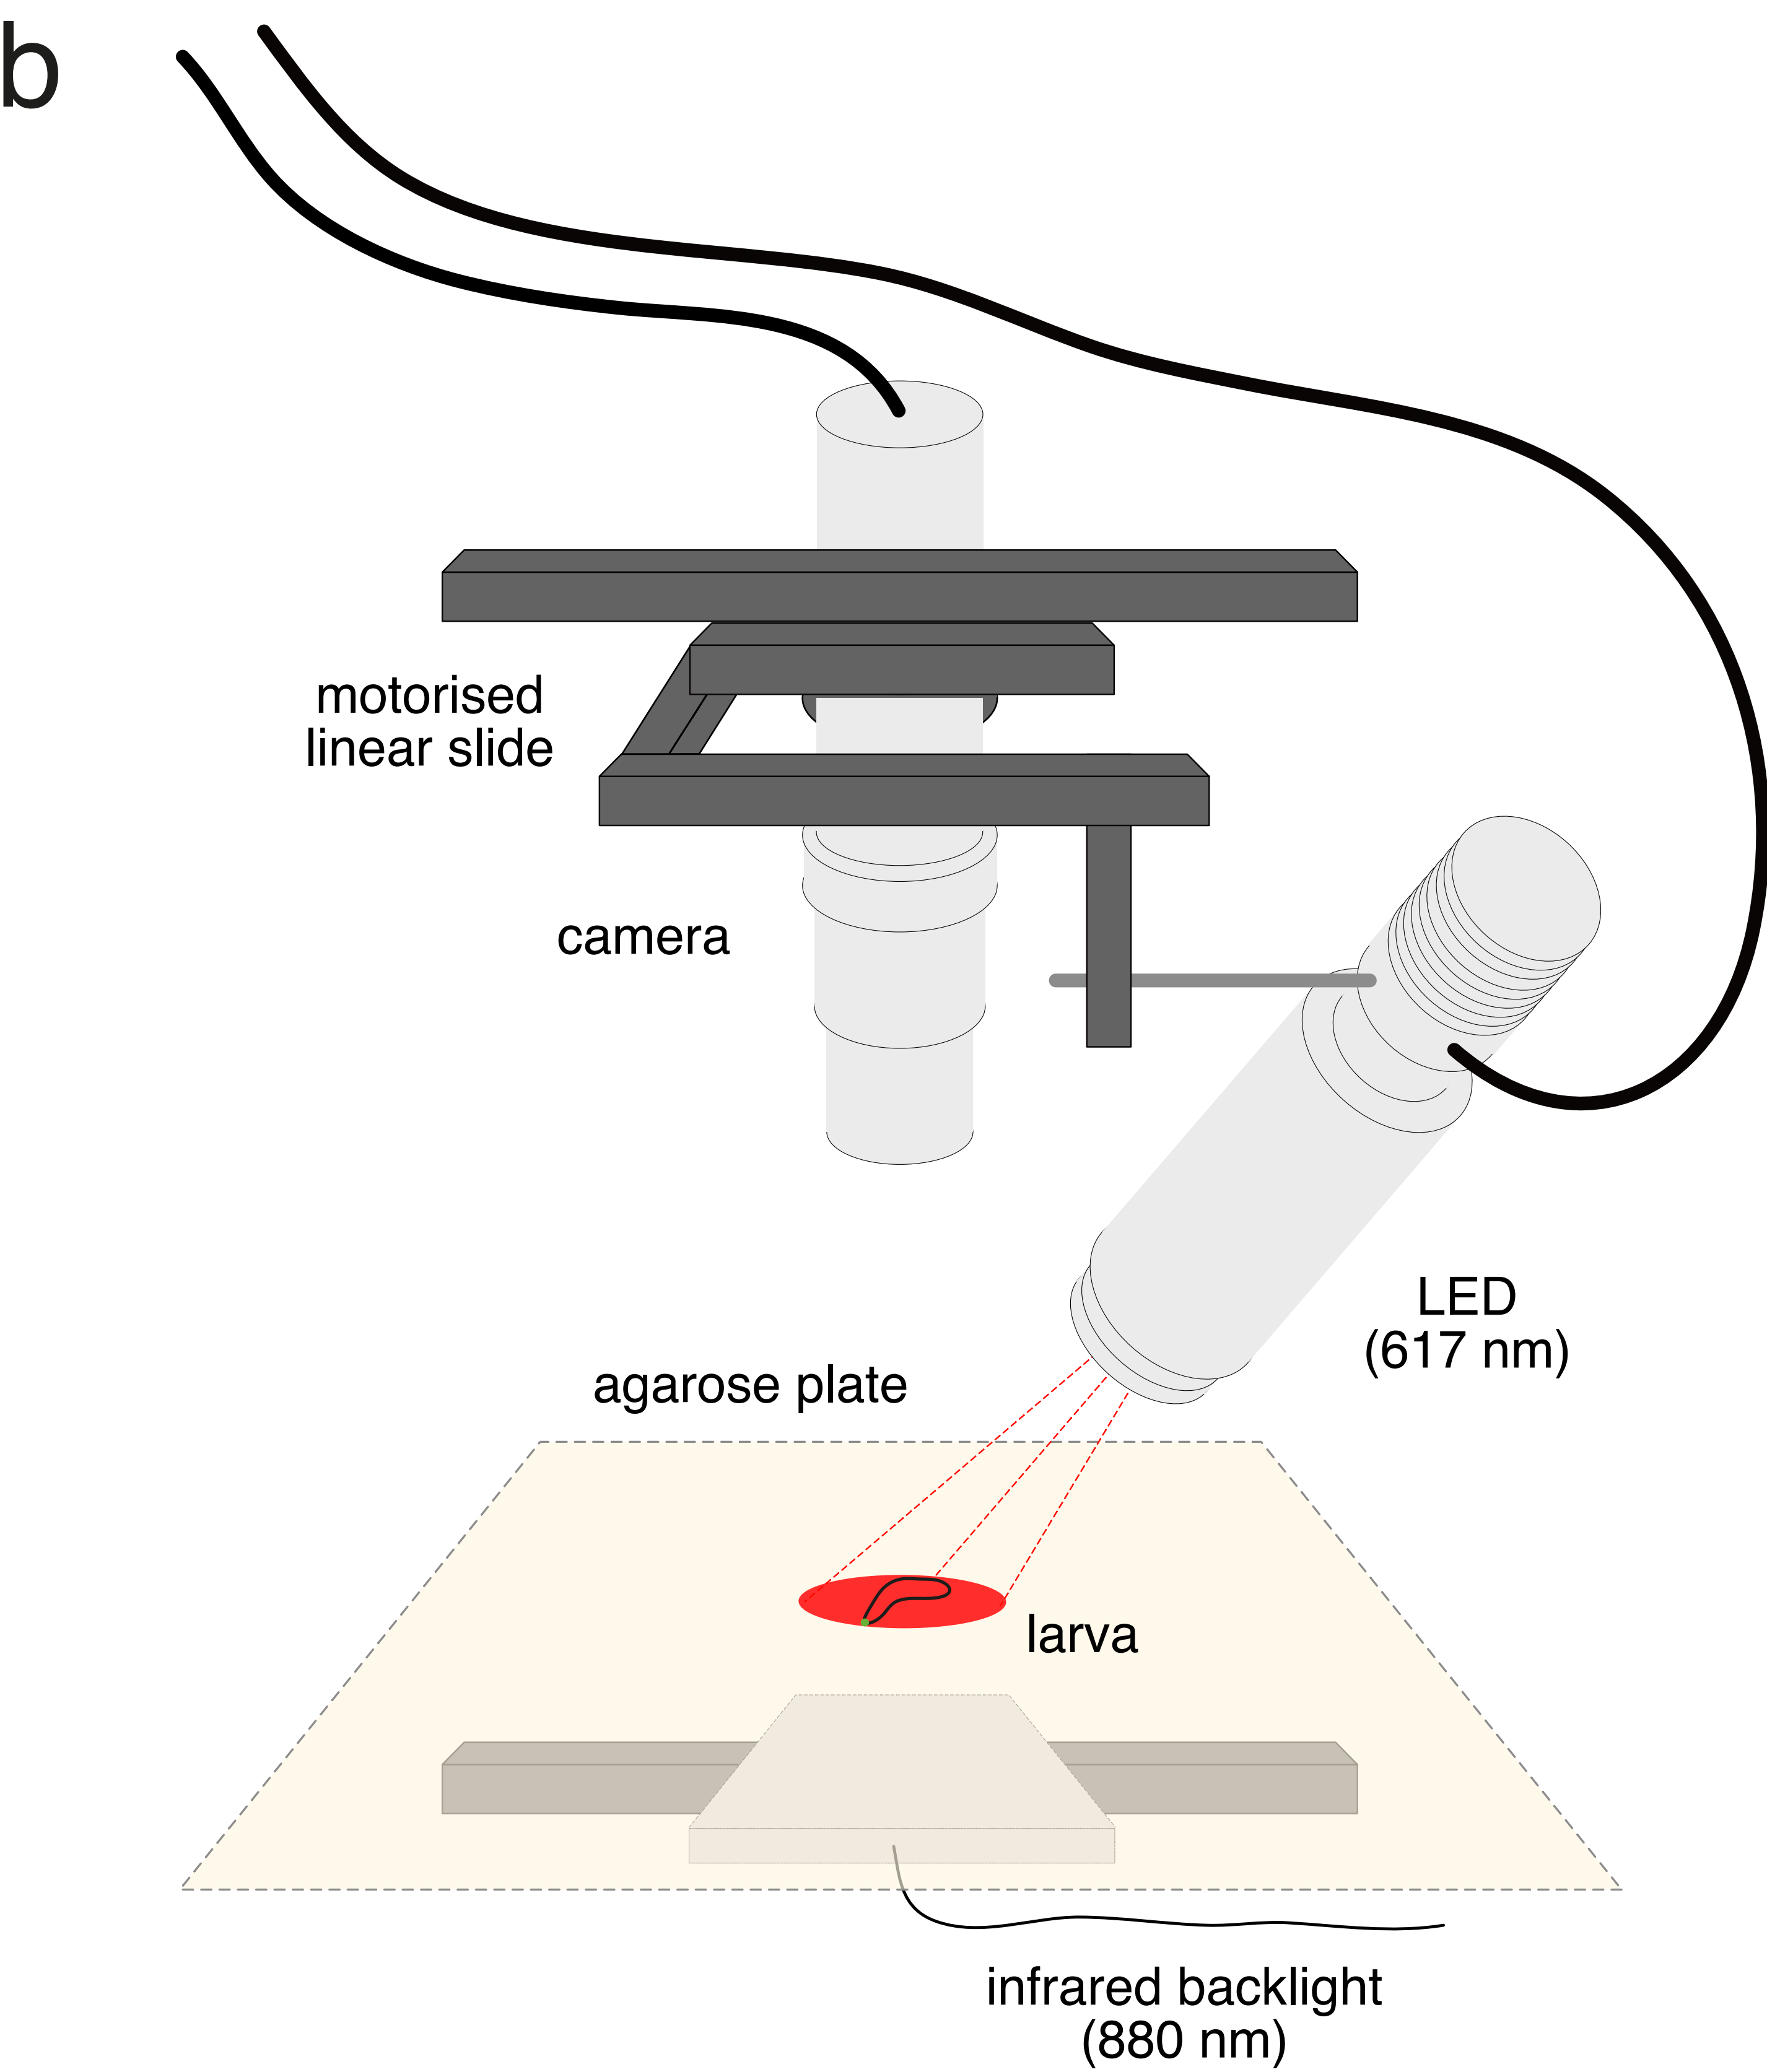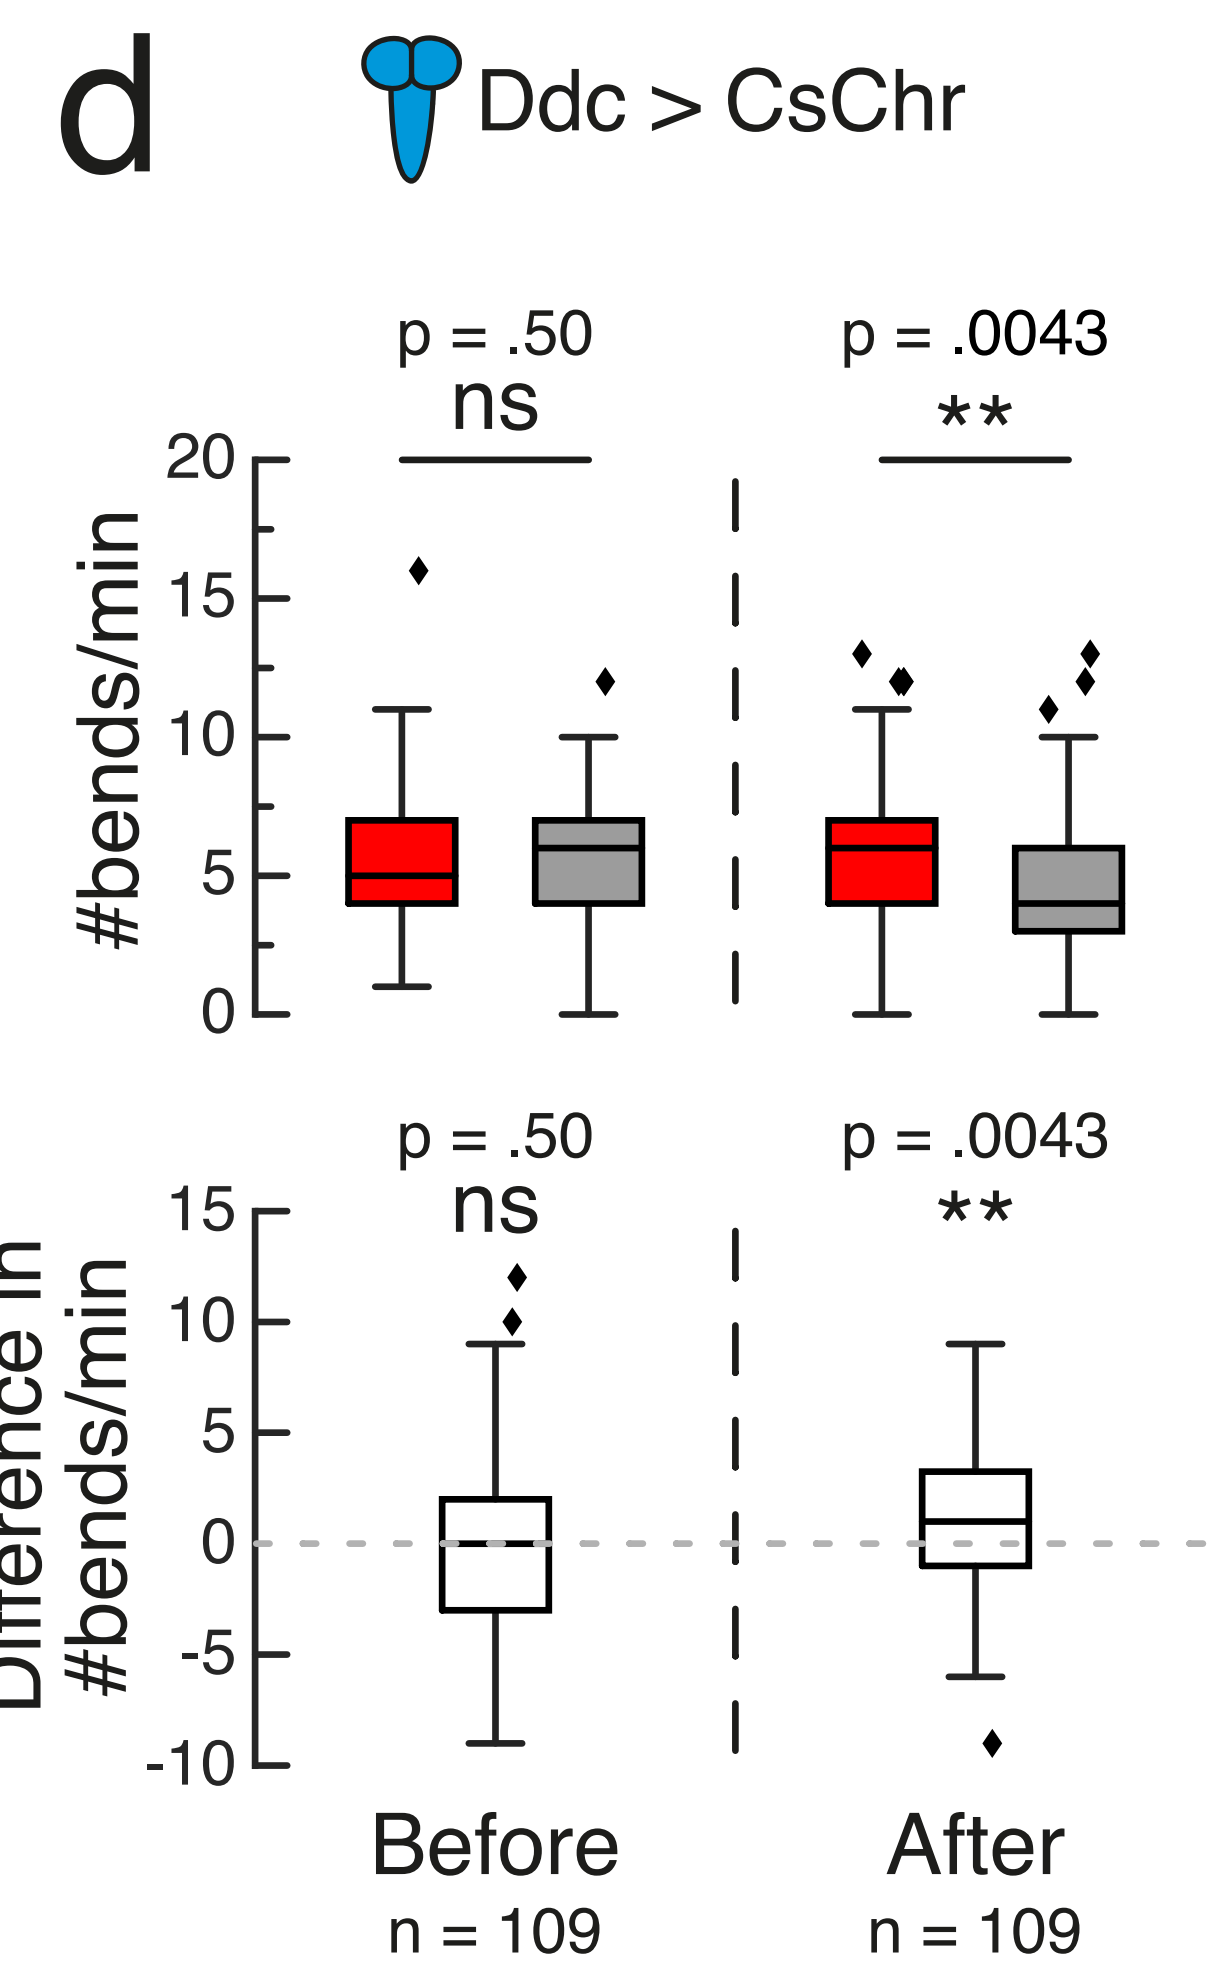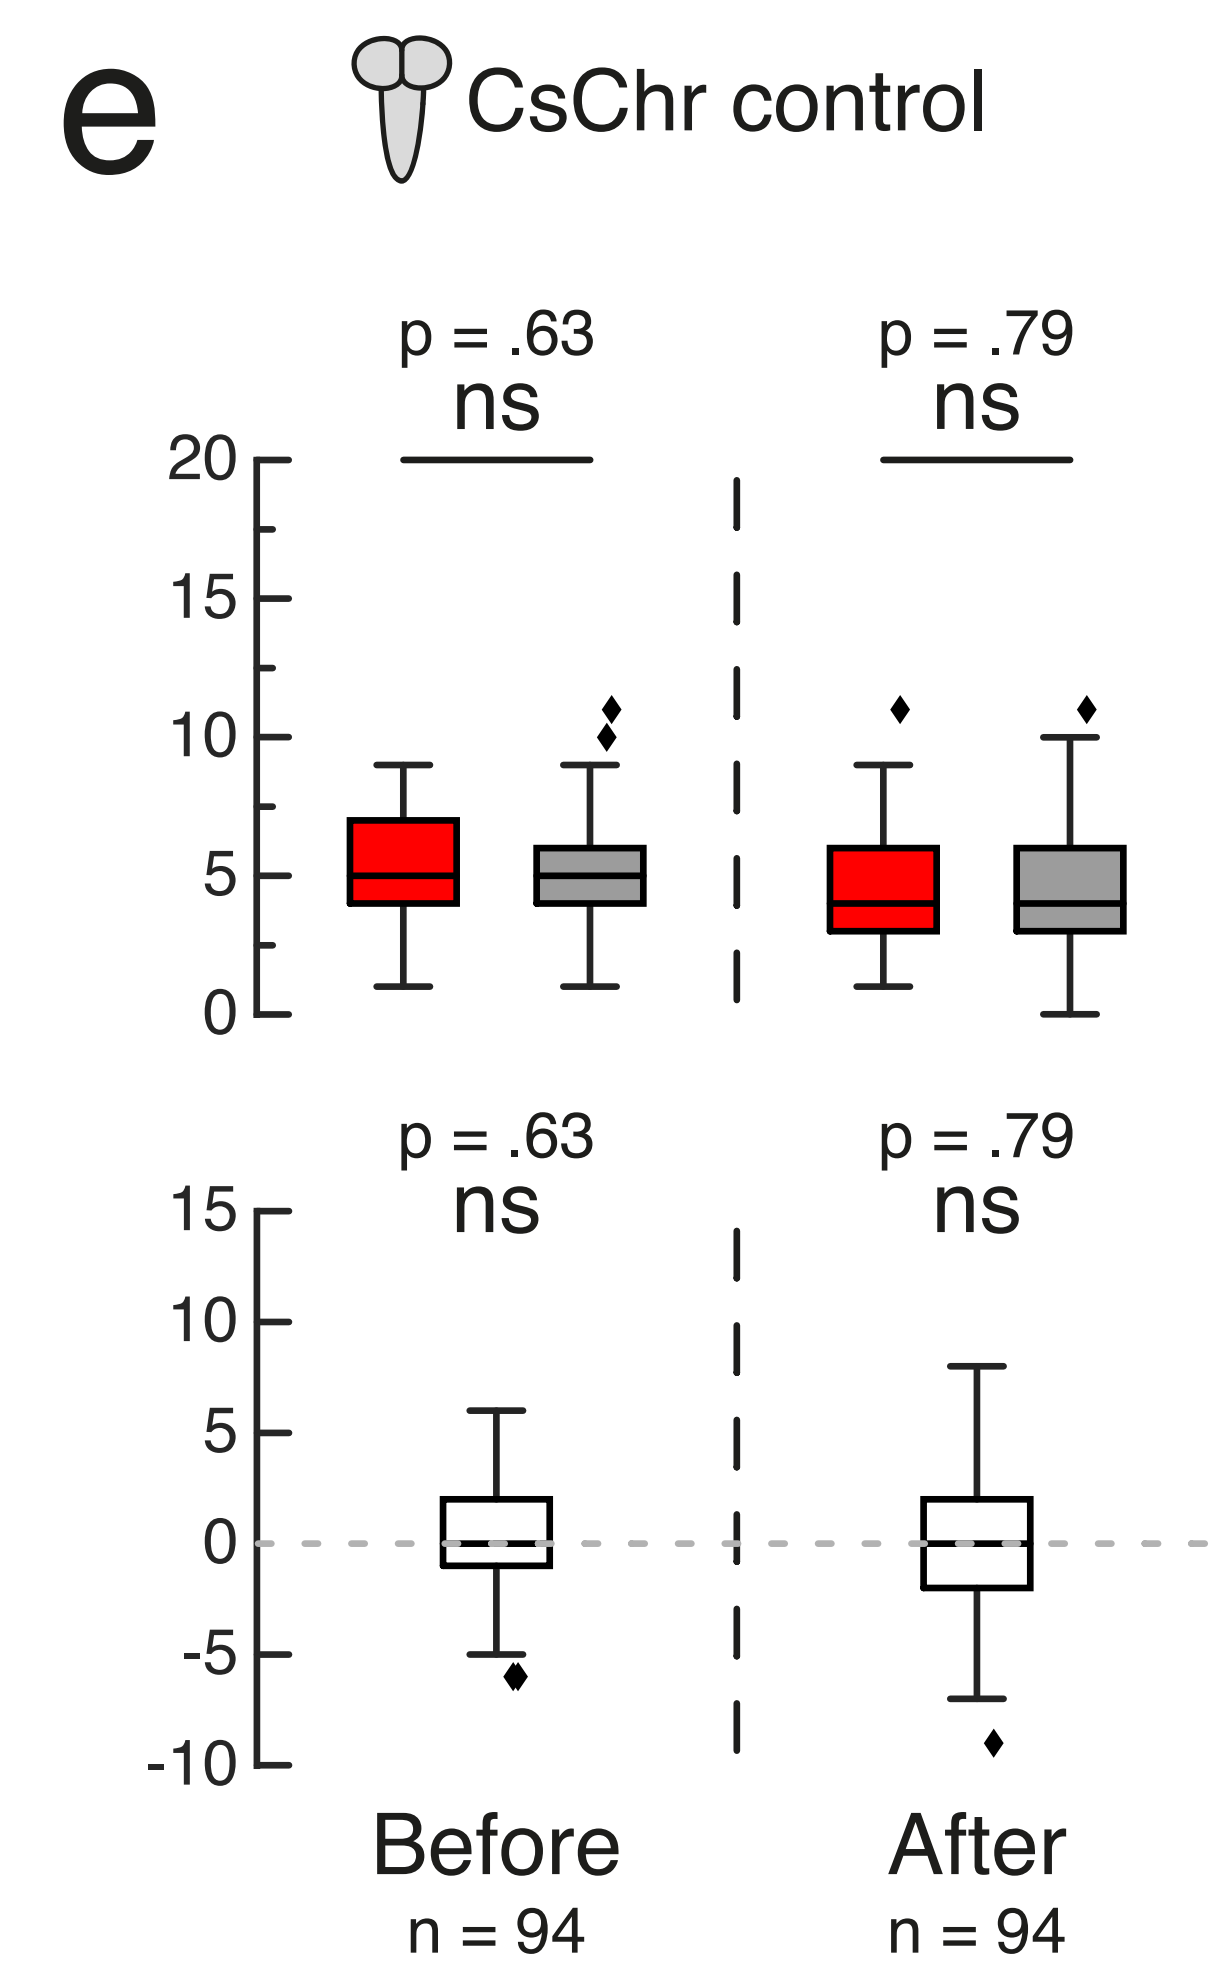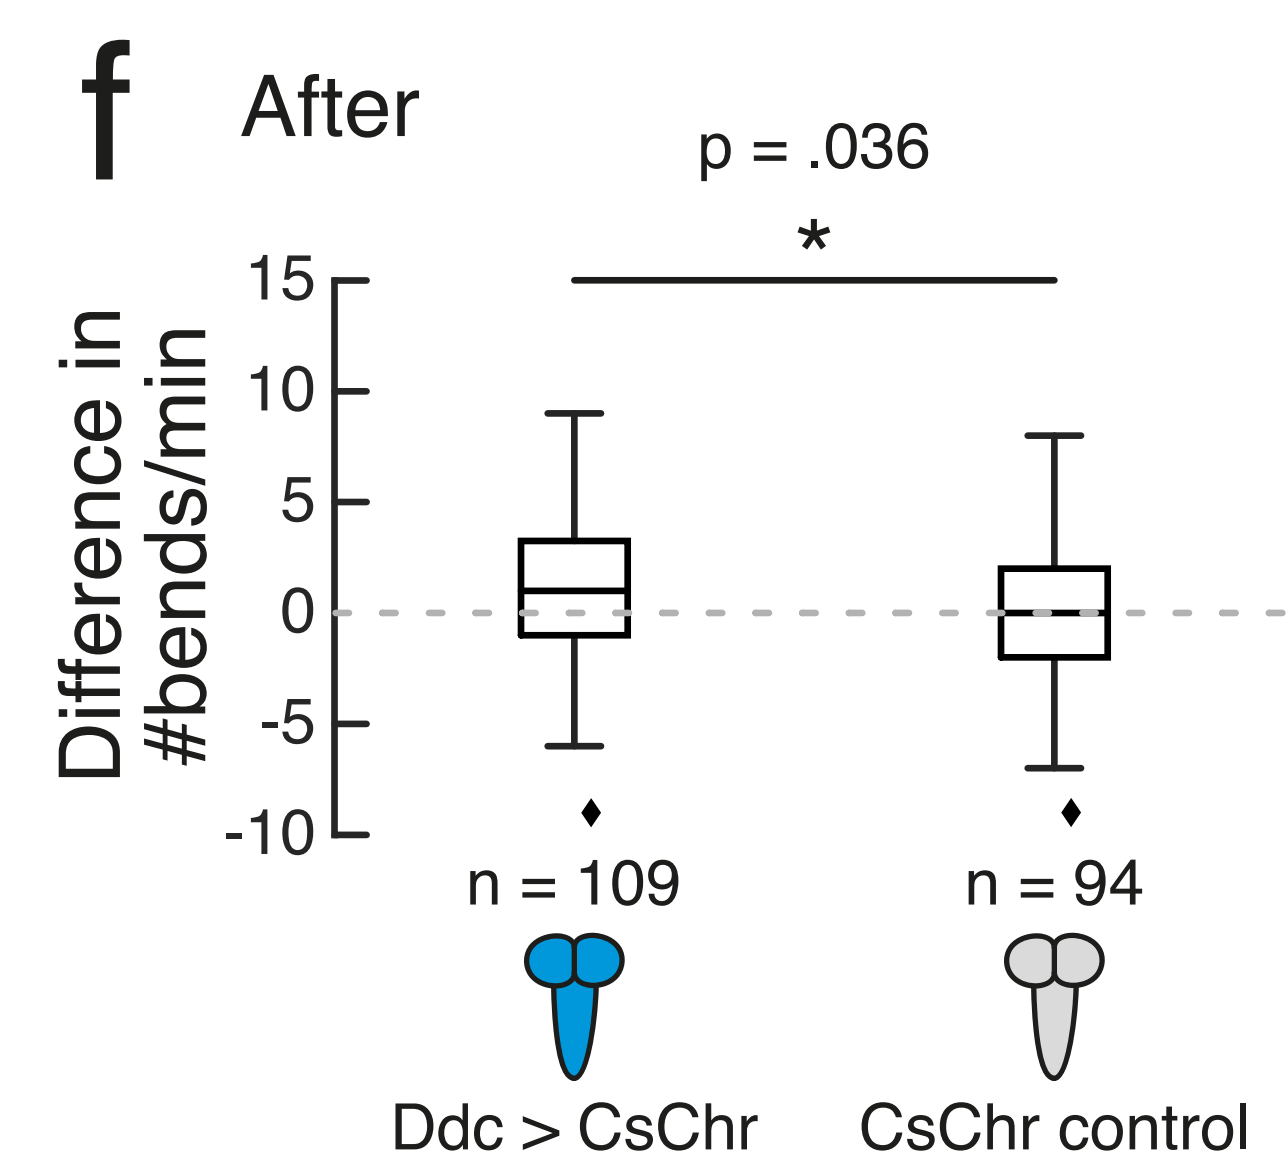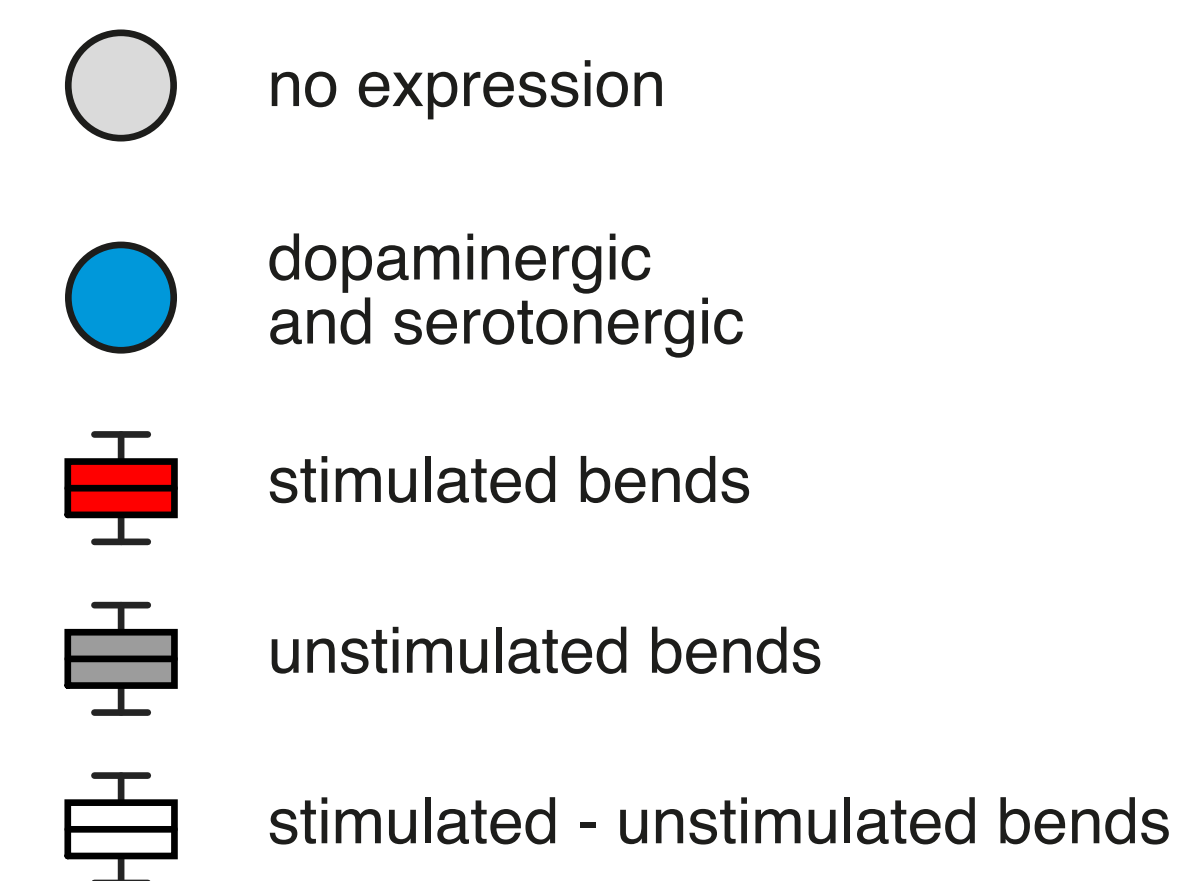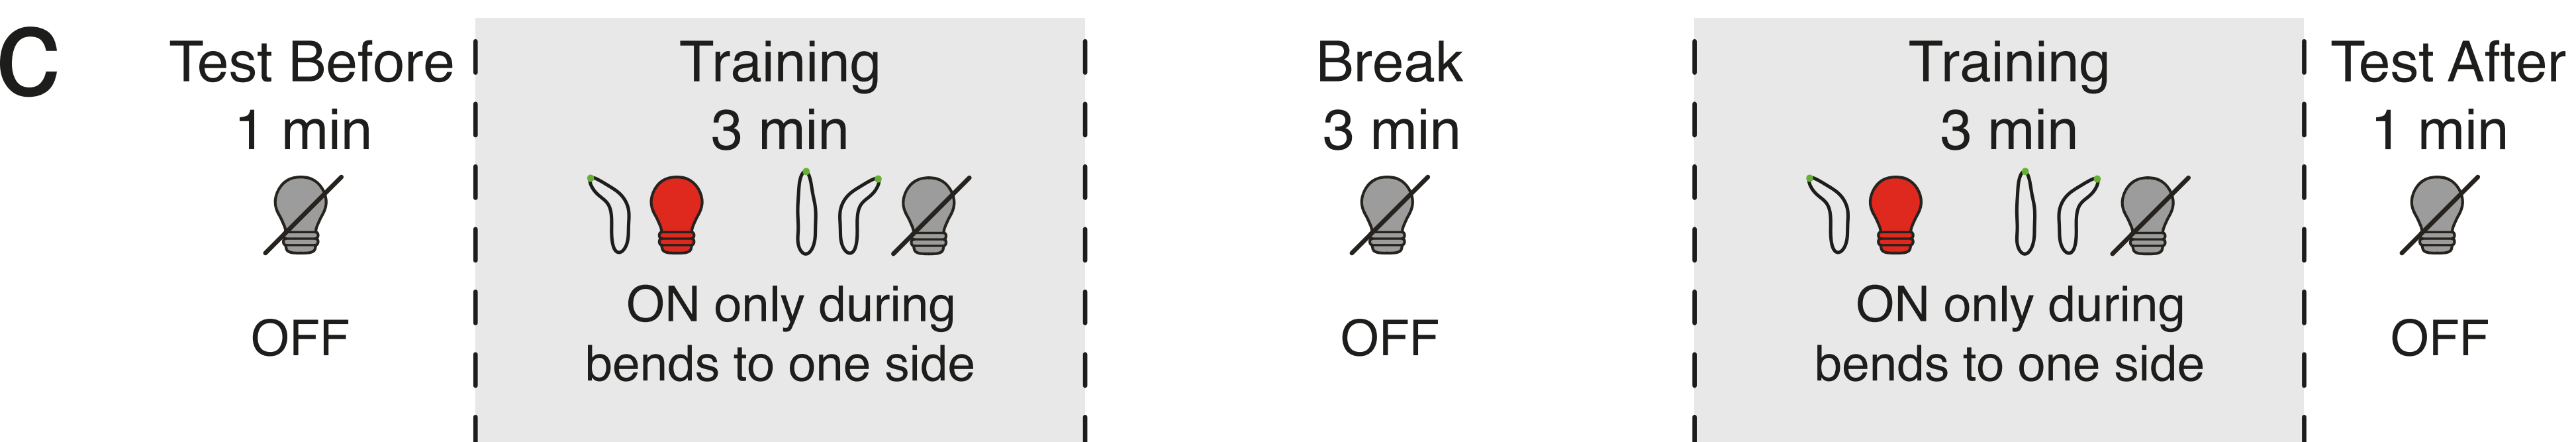

Supplement: supp [file elife-70015-supp-v1.zip]

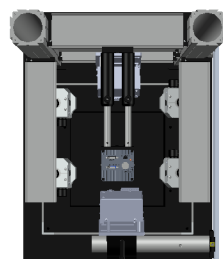

Supplement: supp [file elife-70015-supp-v1.zip]

**a**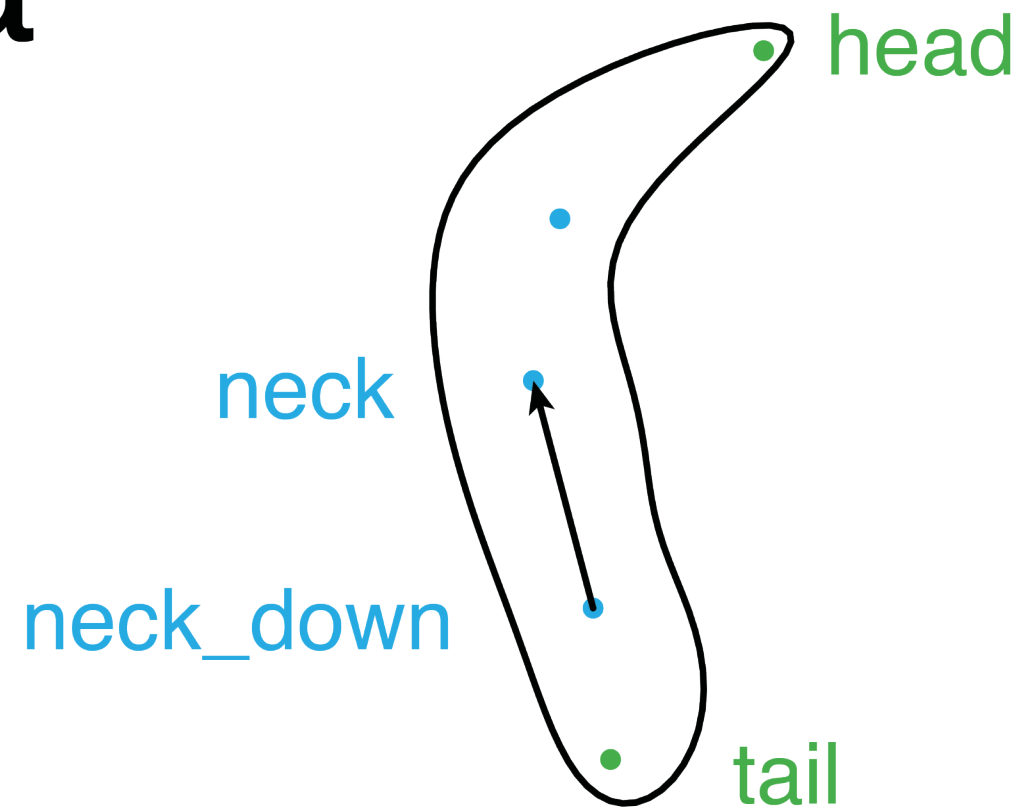**b**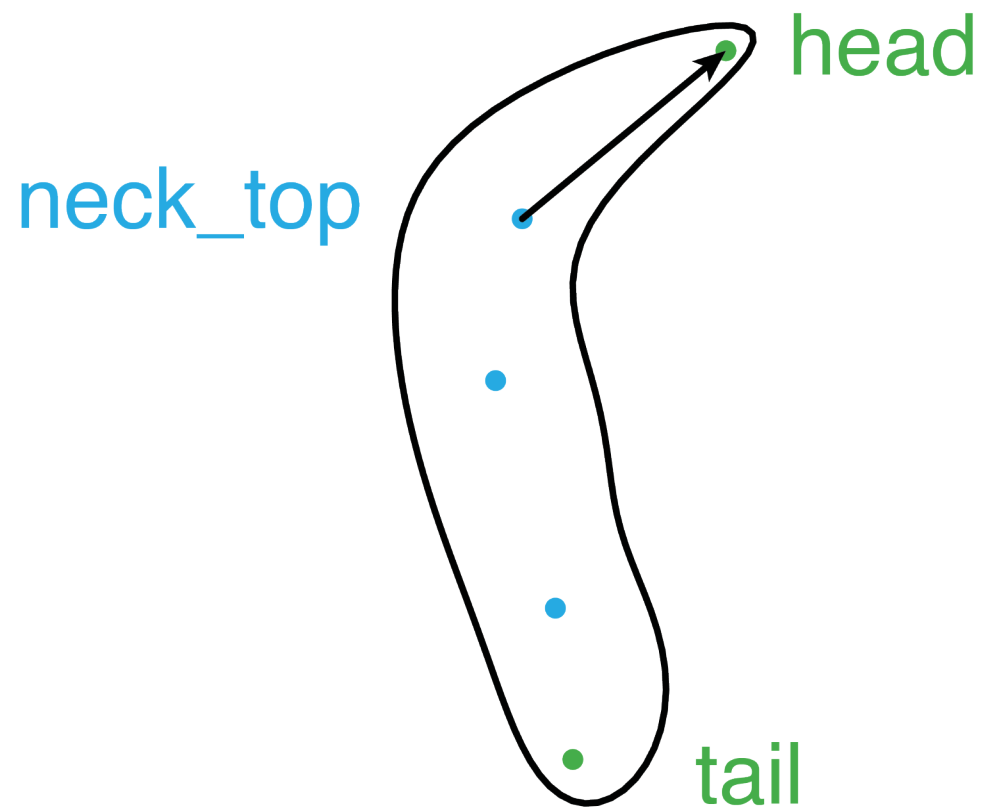**c**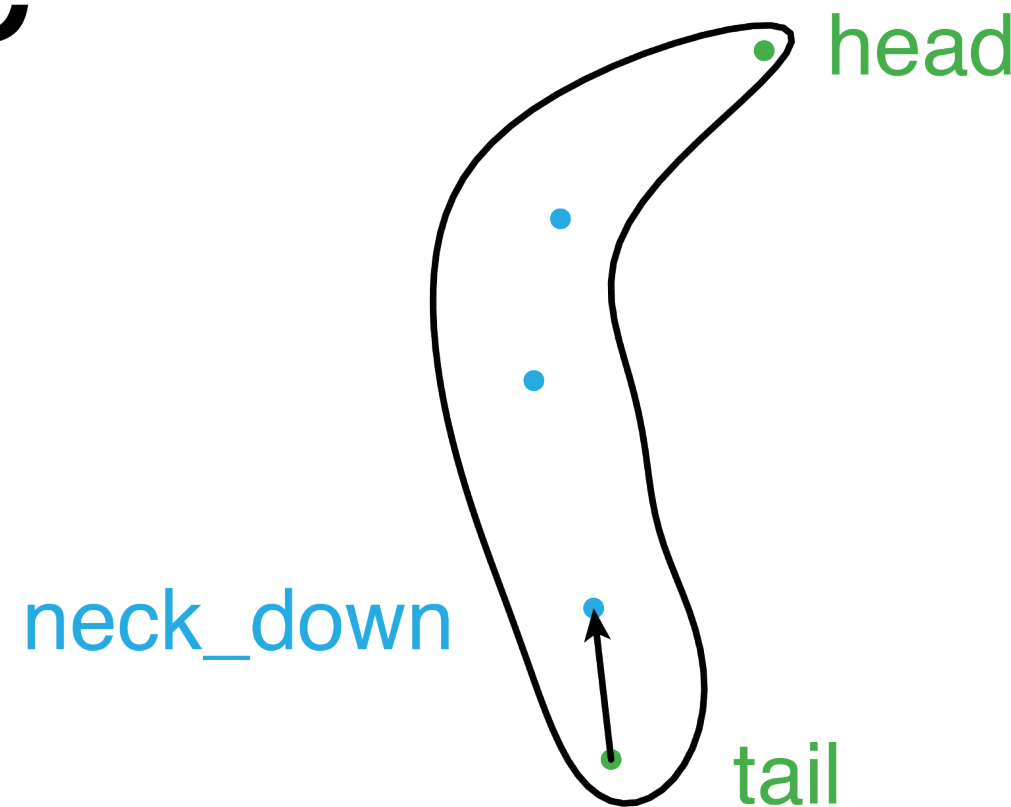

Supplement: supp [file elife-70015-supp-v1.zip]

**a**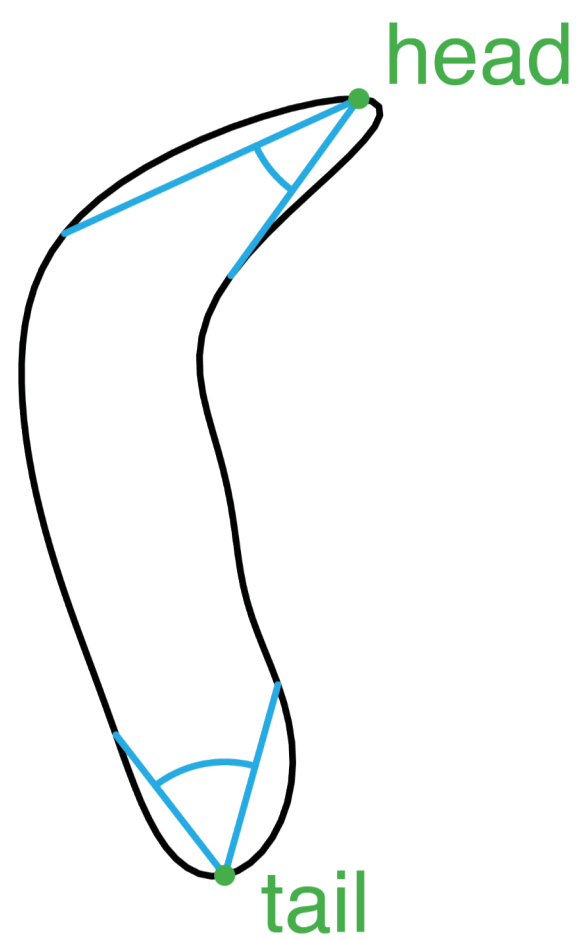**b**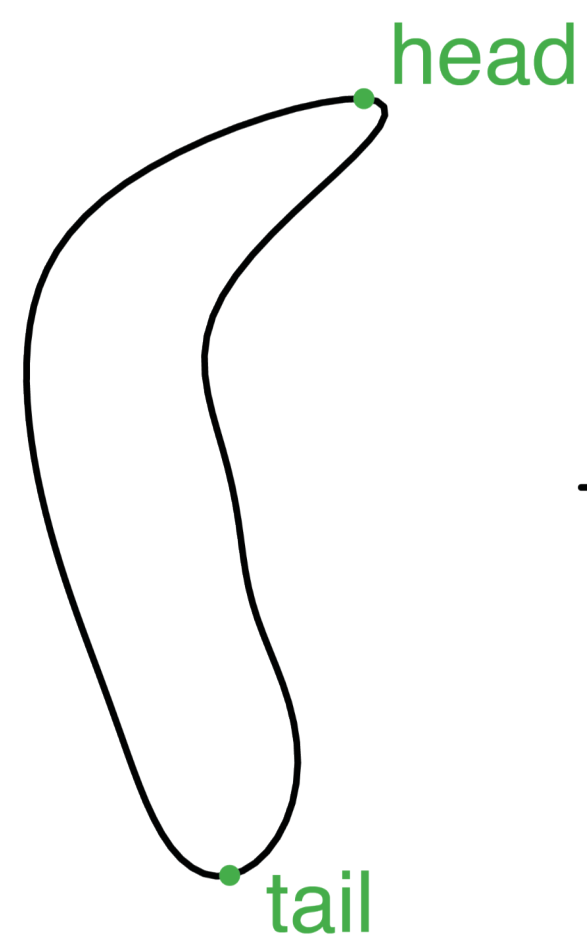

frame i

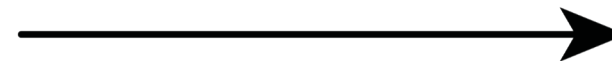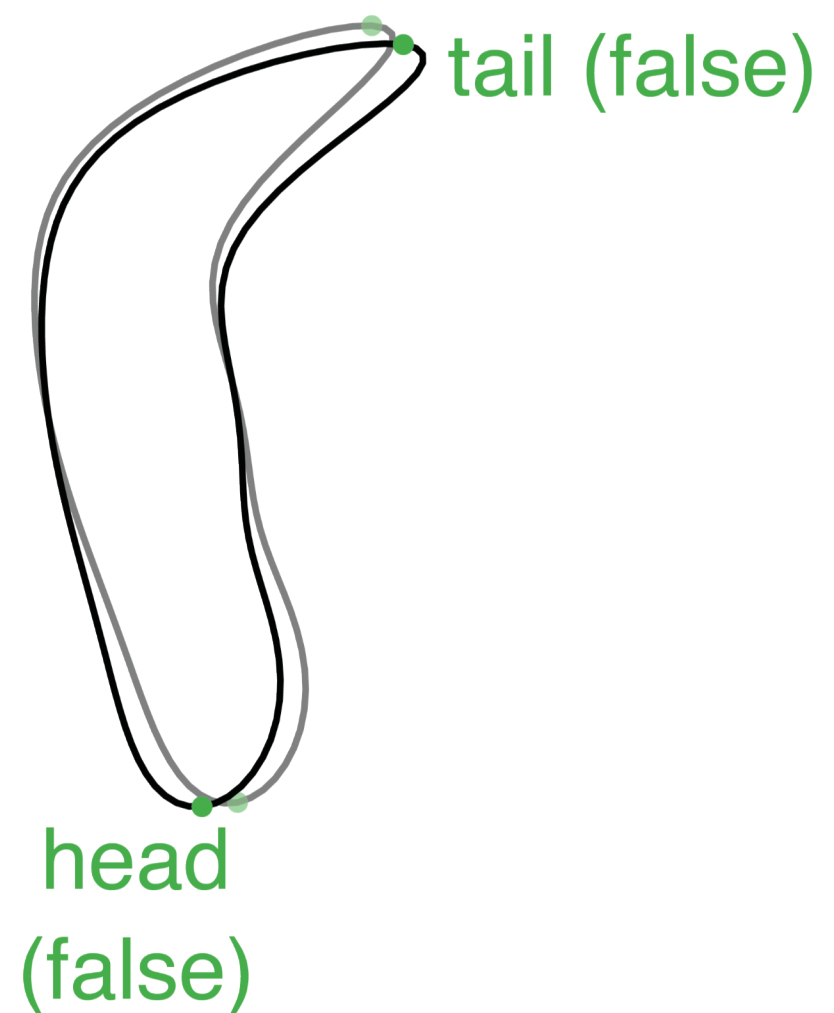

frame i+1

**c**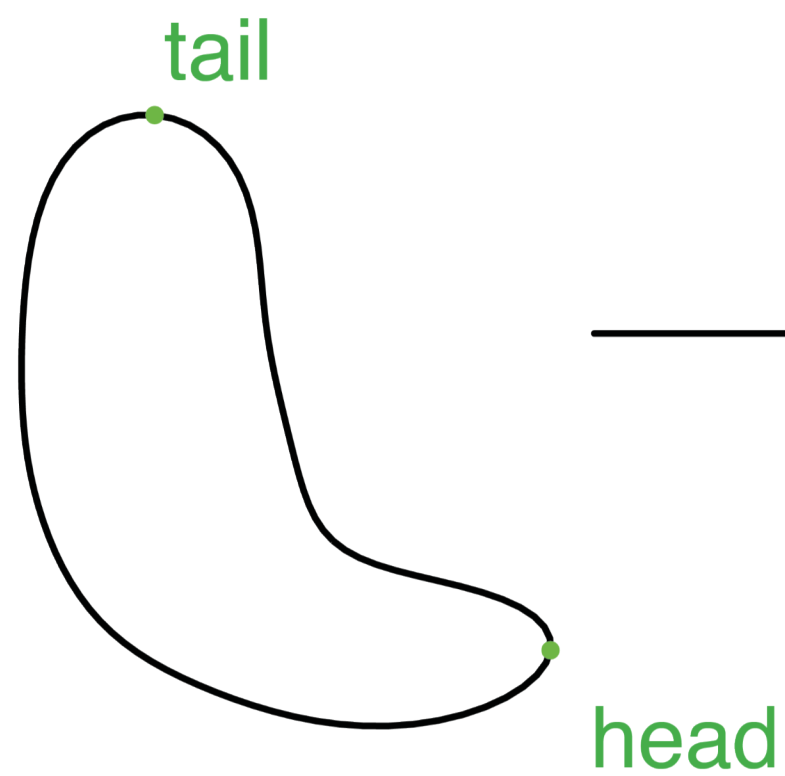

before ball

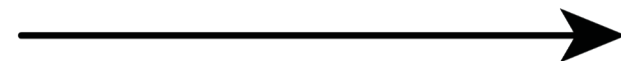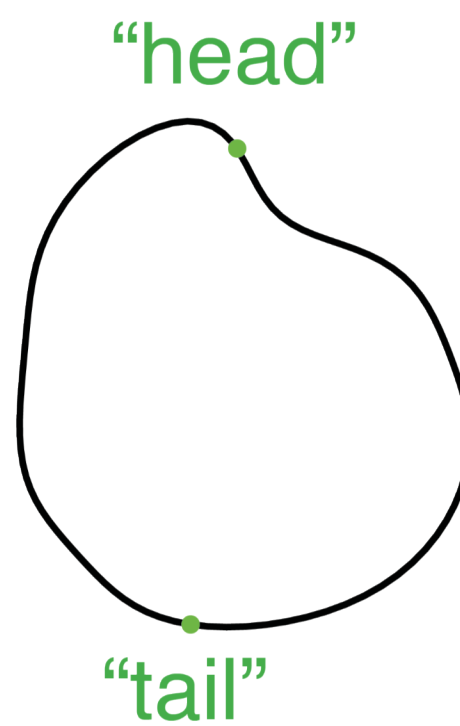

during ball

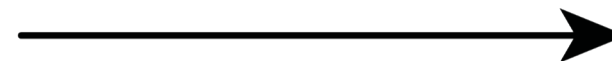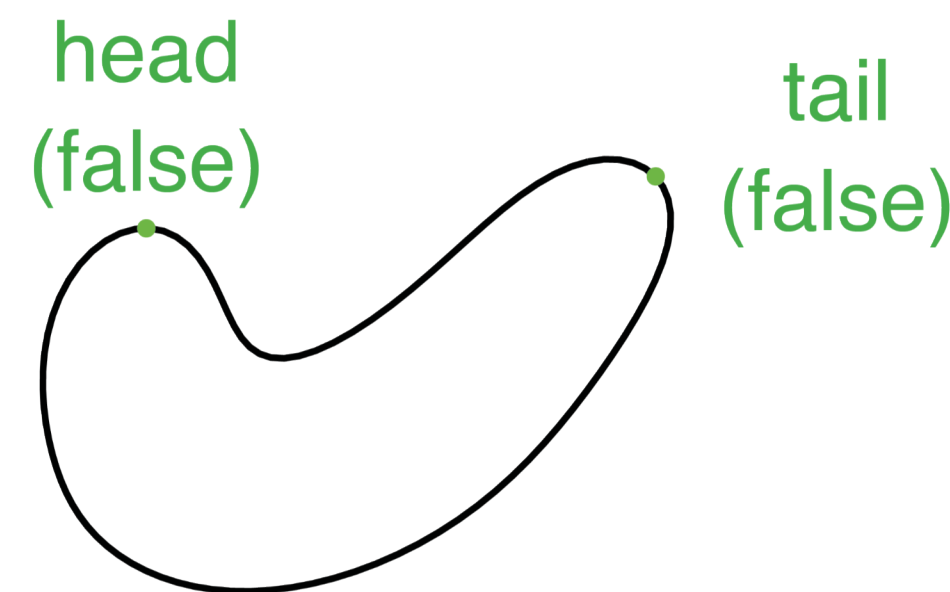

after ball

Supplement: supp [file elife-70015-supp-v1.zip]

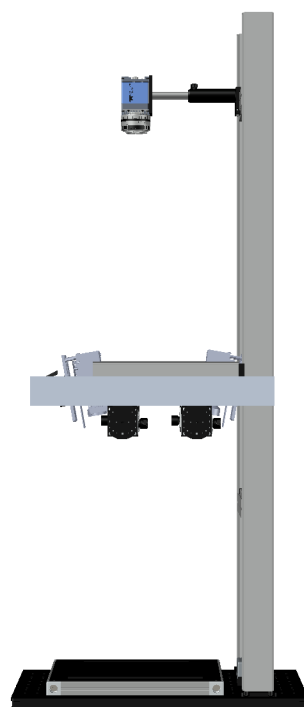

Supplement: supp [file elife-70015-supp-v1.zip]

**a**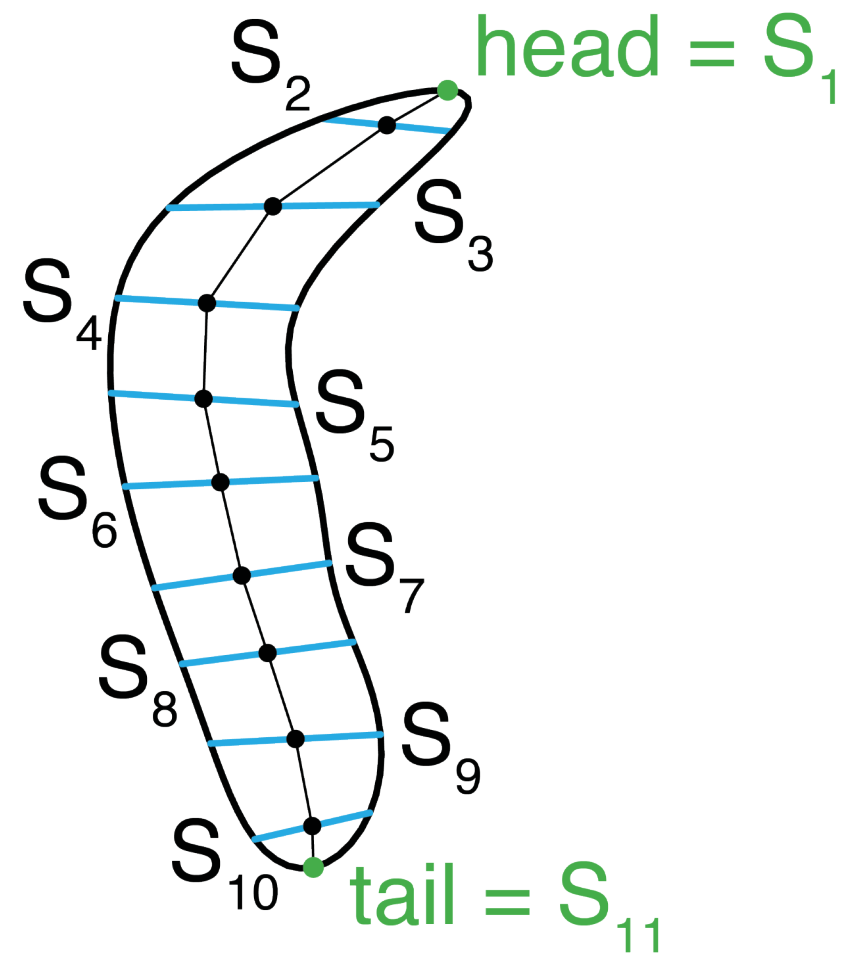

before smoothing  
of the spine

**b**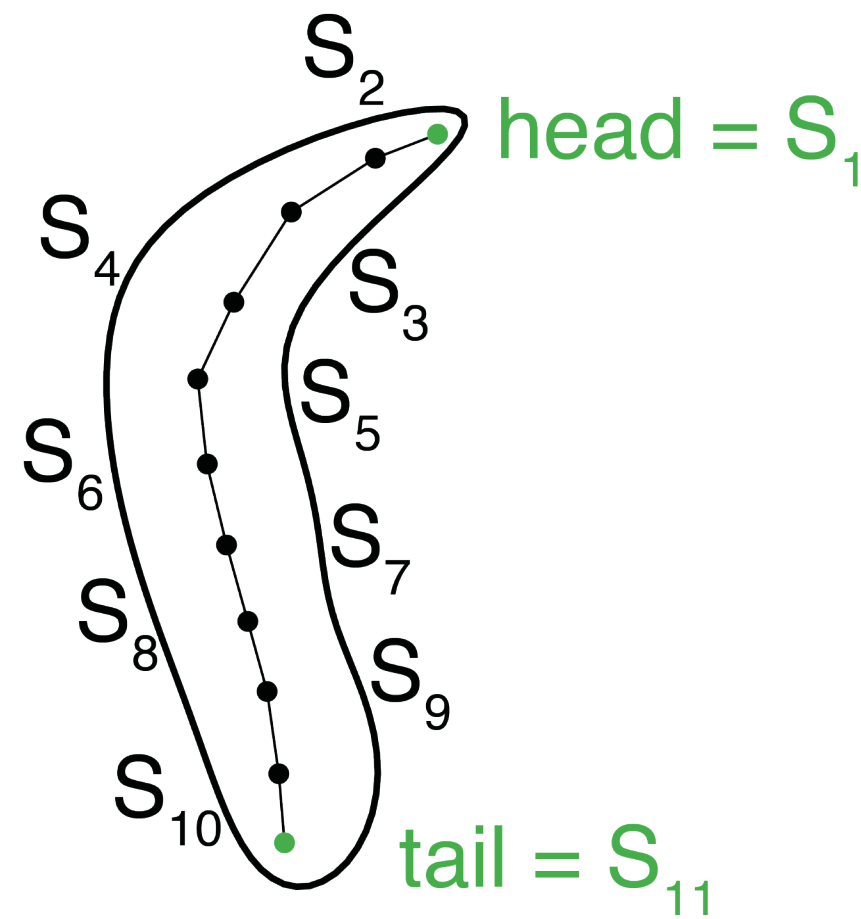

after smoothing  
of the spine

**c**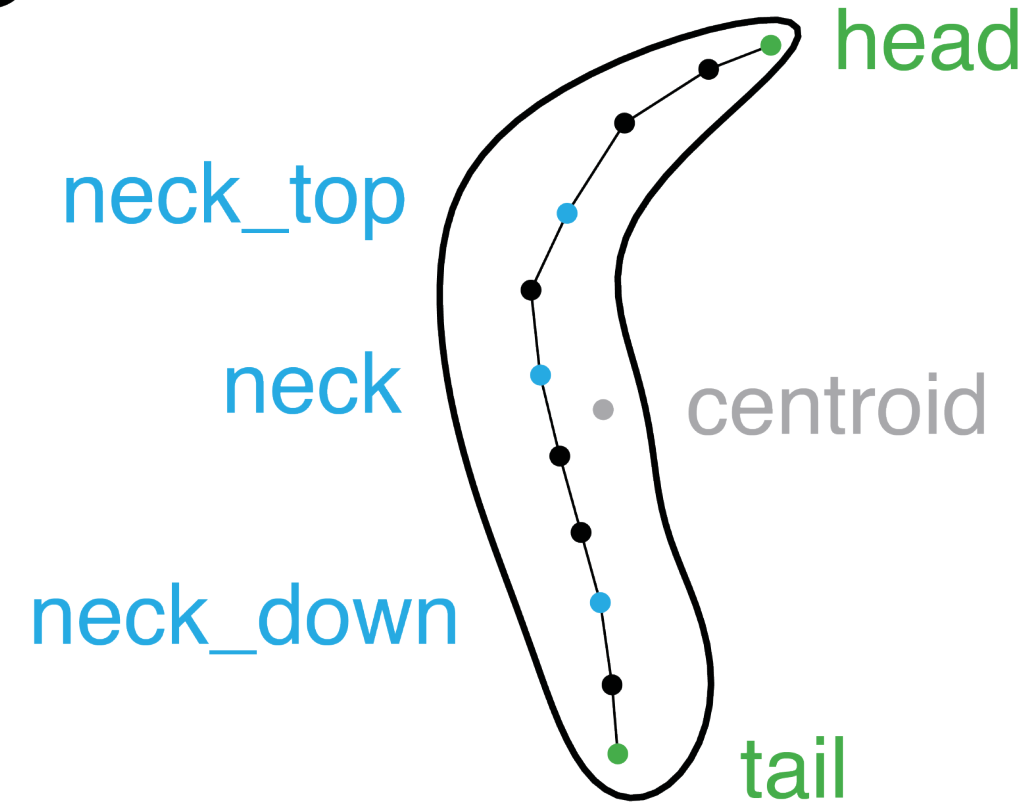

after landmark  
detection

Supplement: supp [file elife-70015-supp-v1.zip]

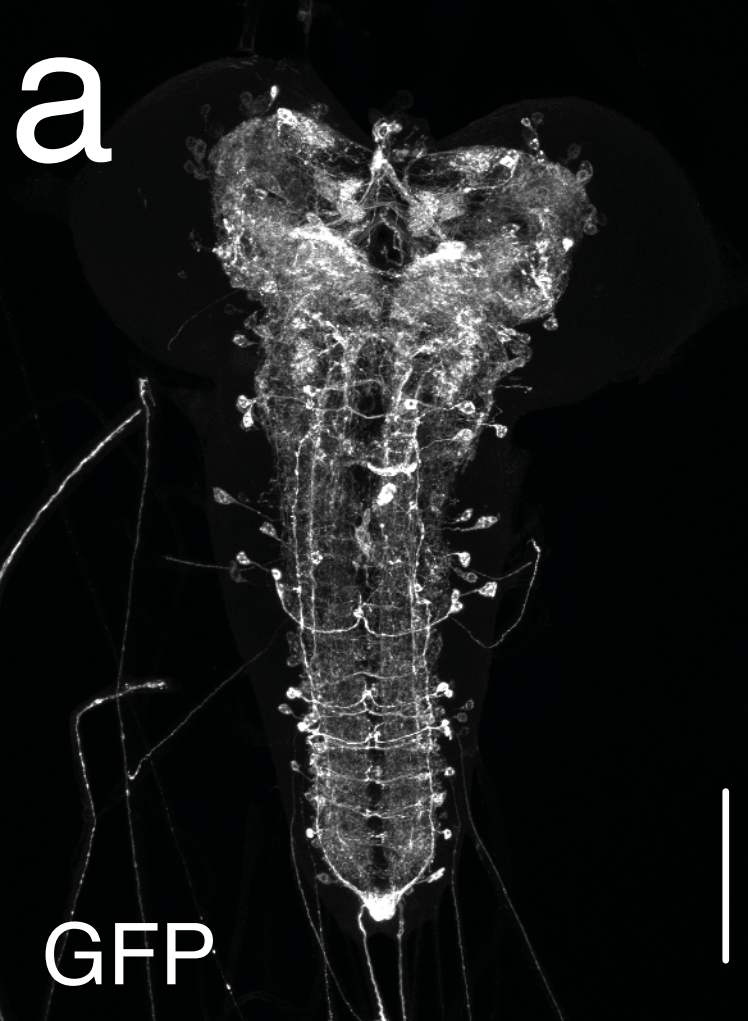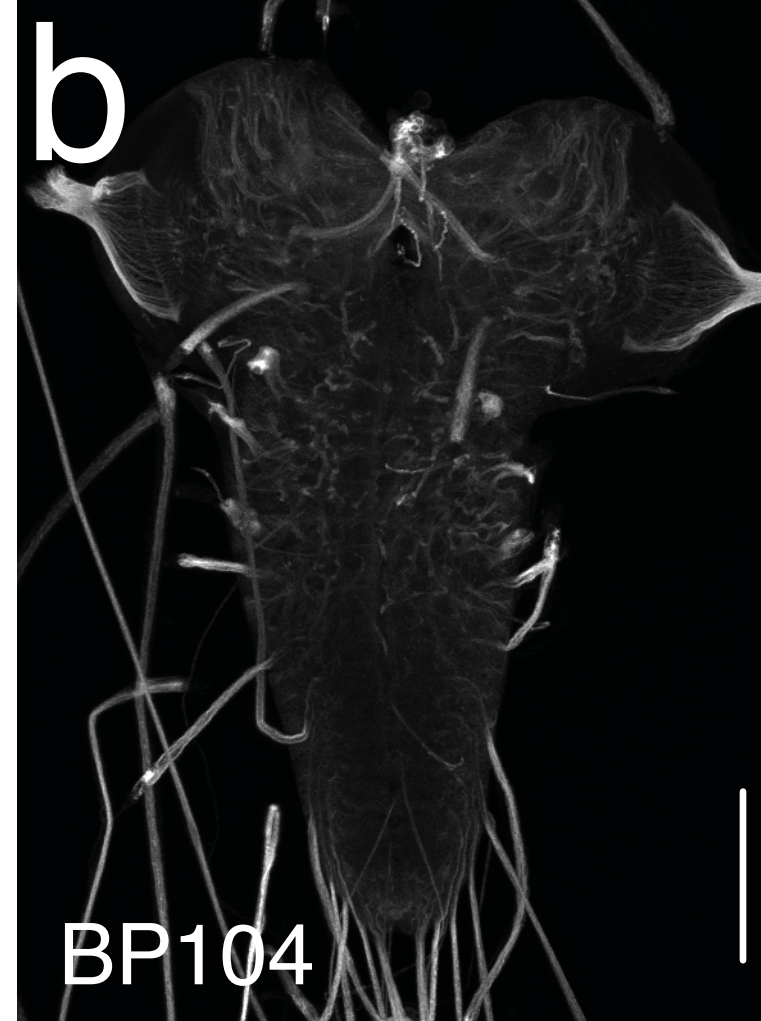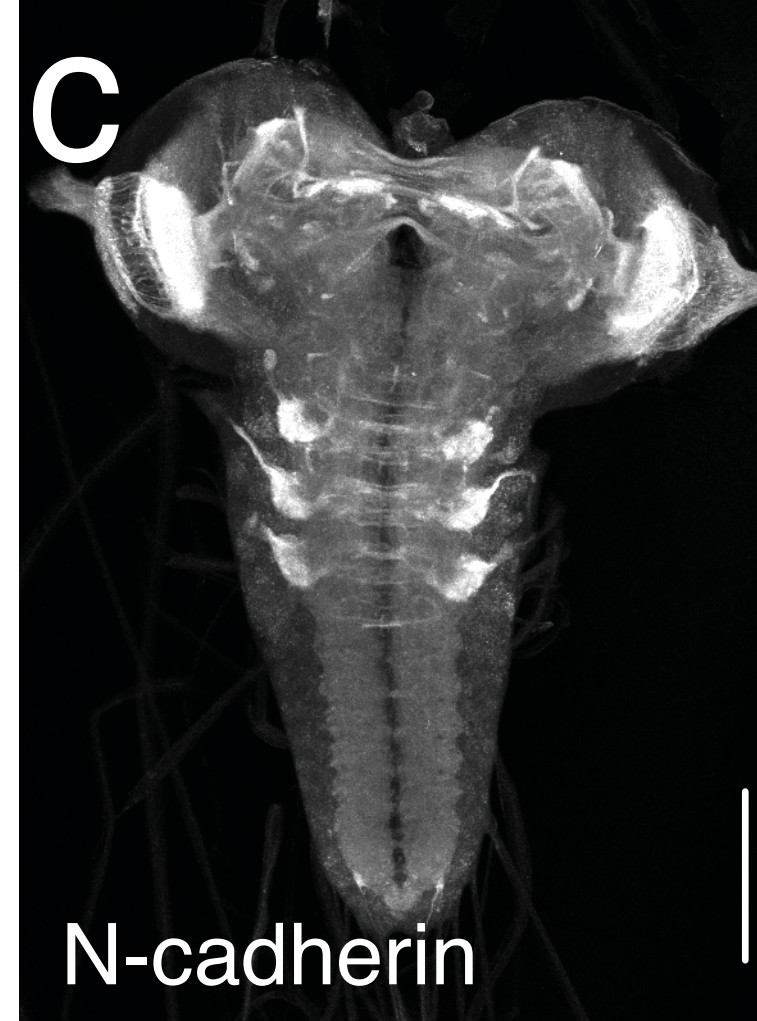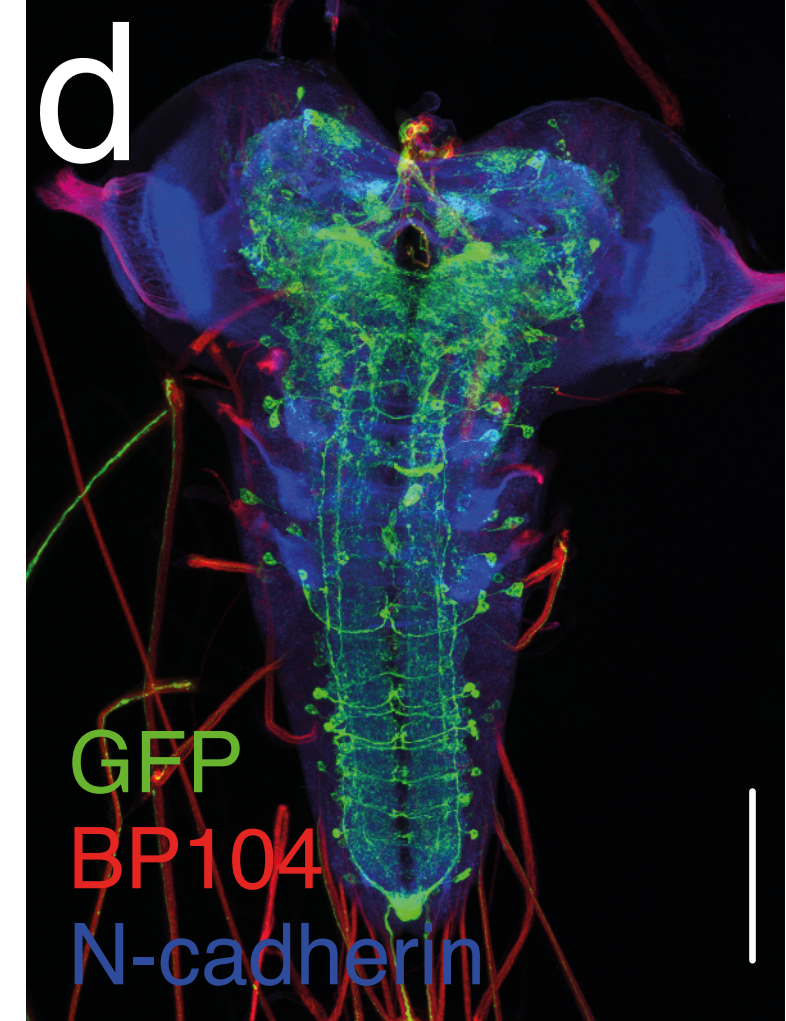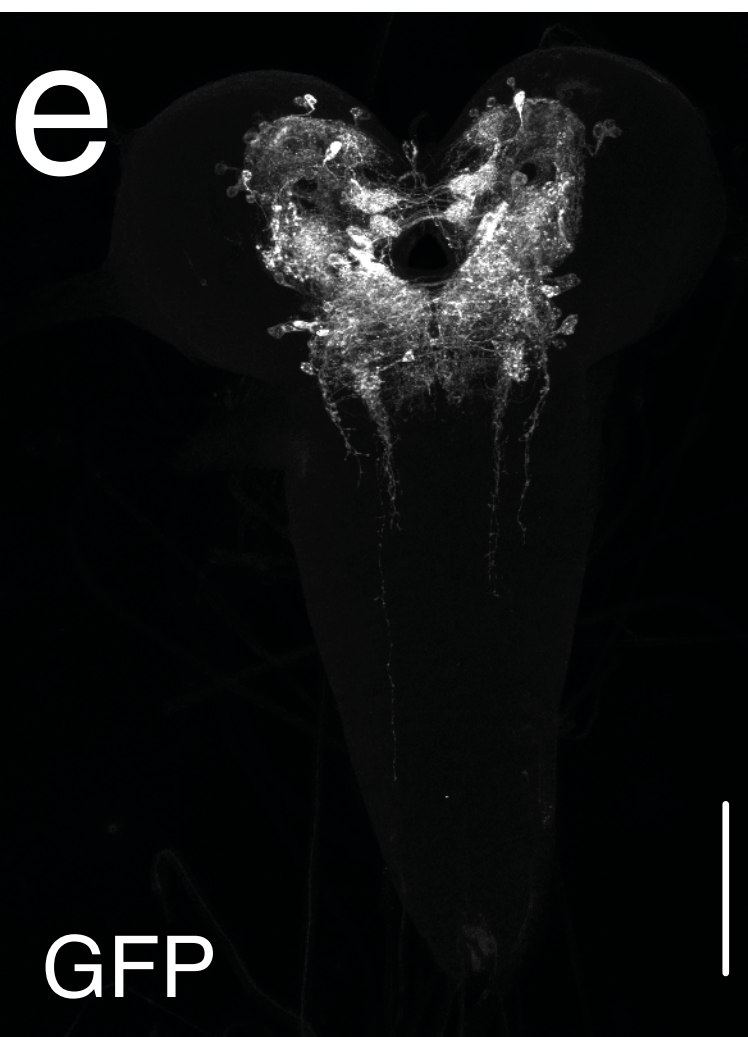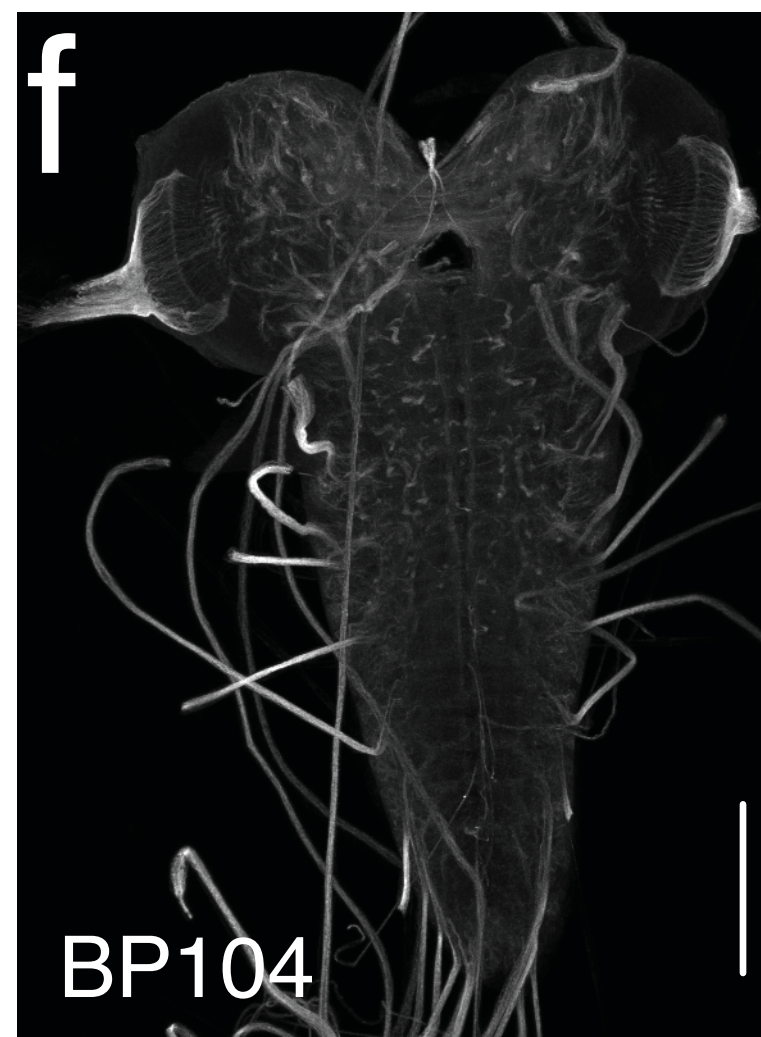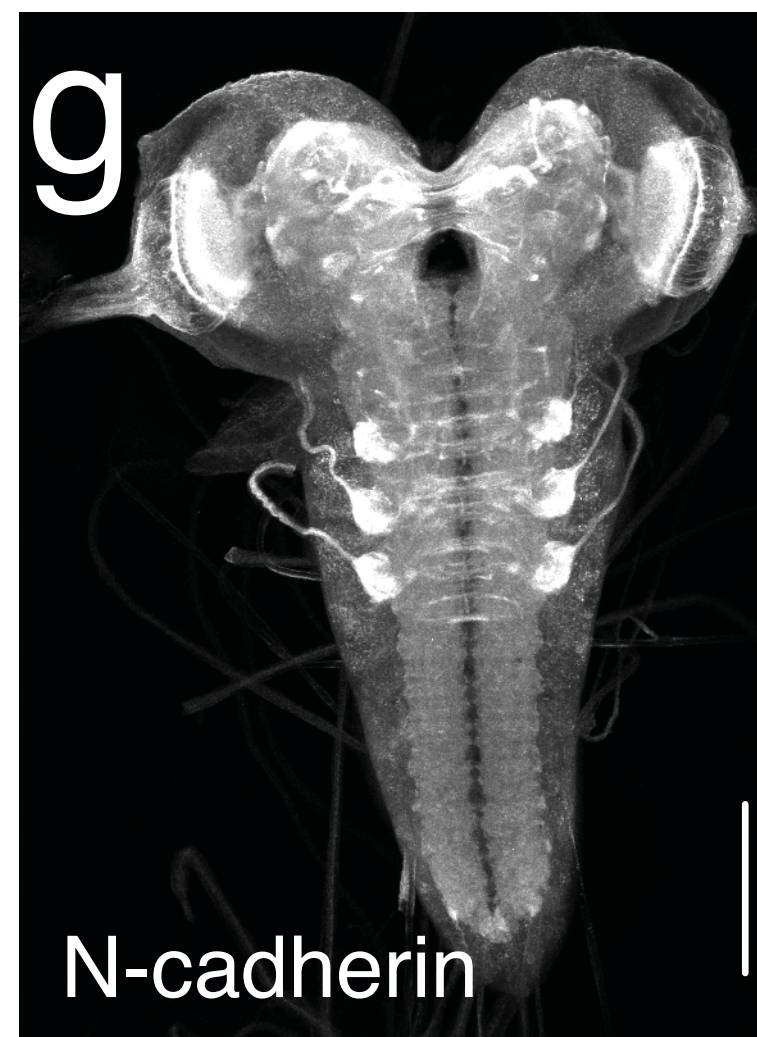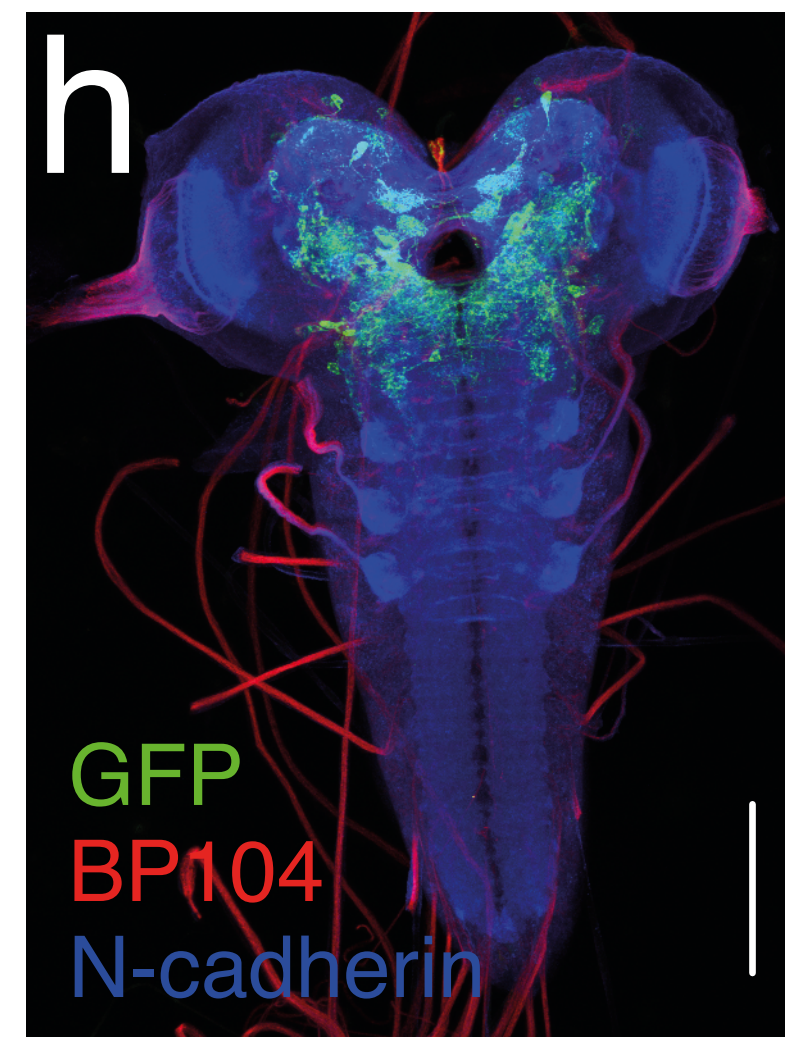

Supplement: supp [file elife-70015-supp-v1.zip]

a

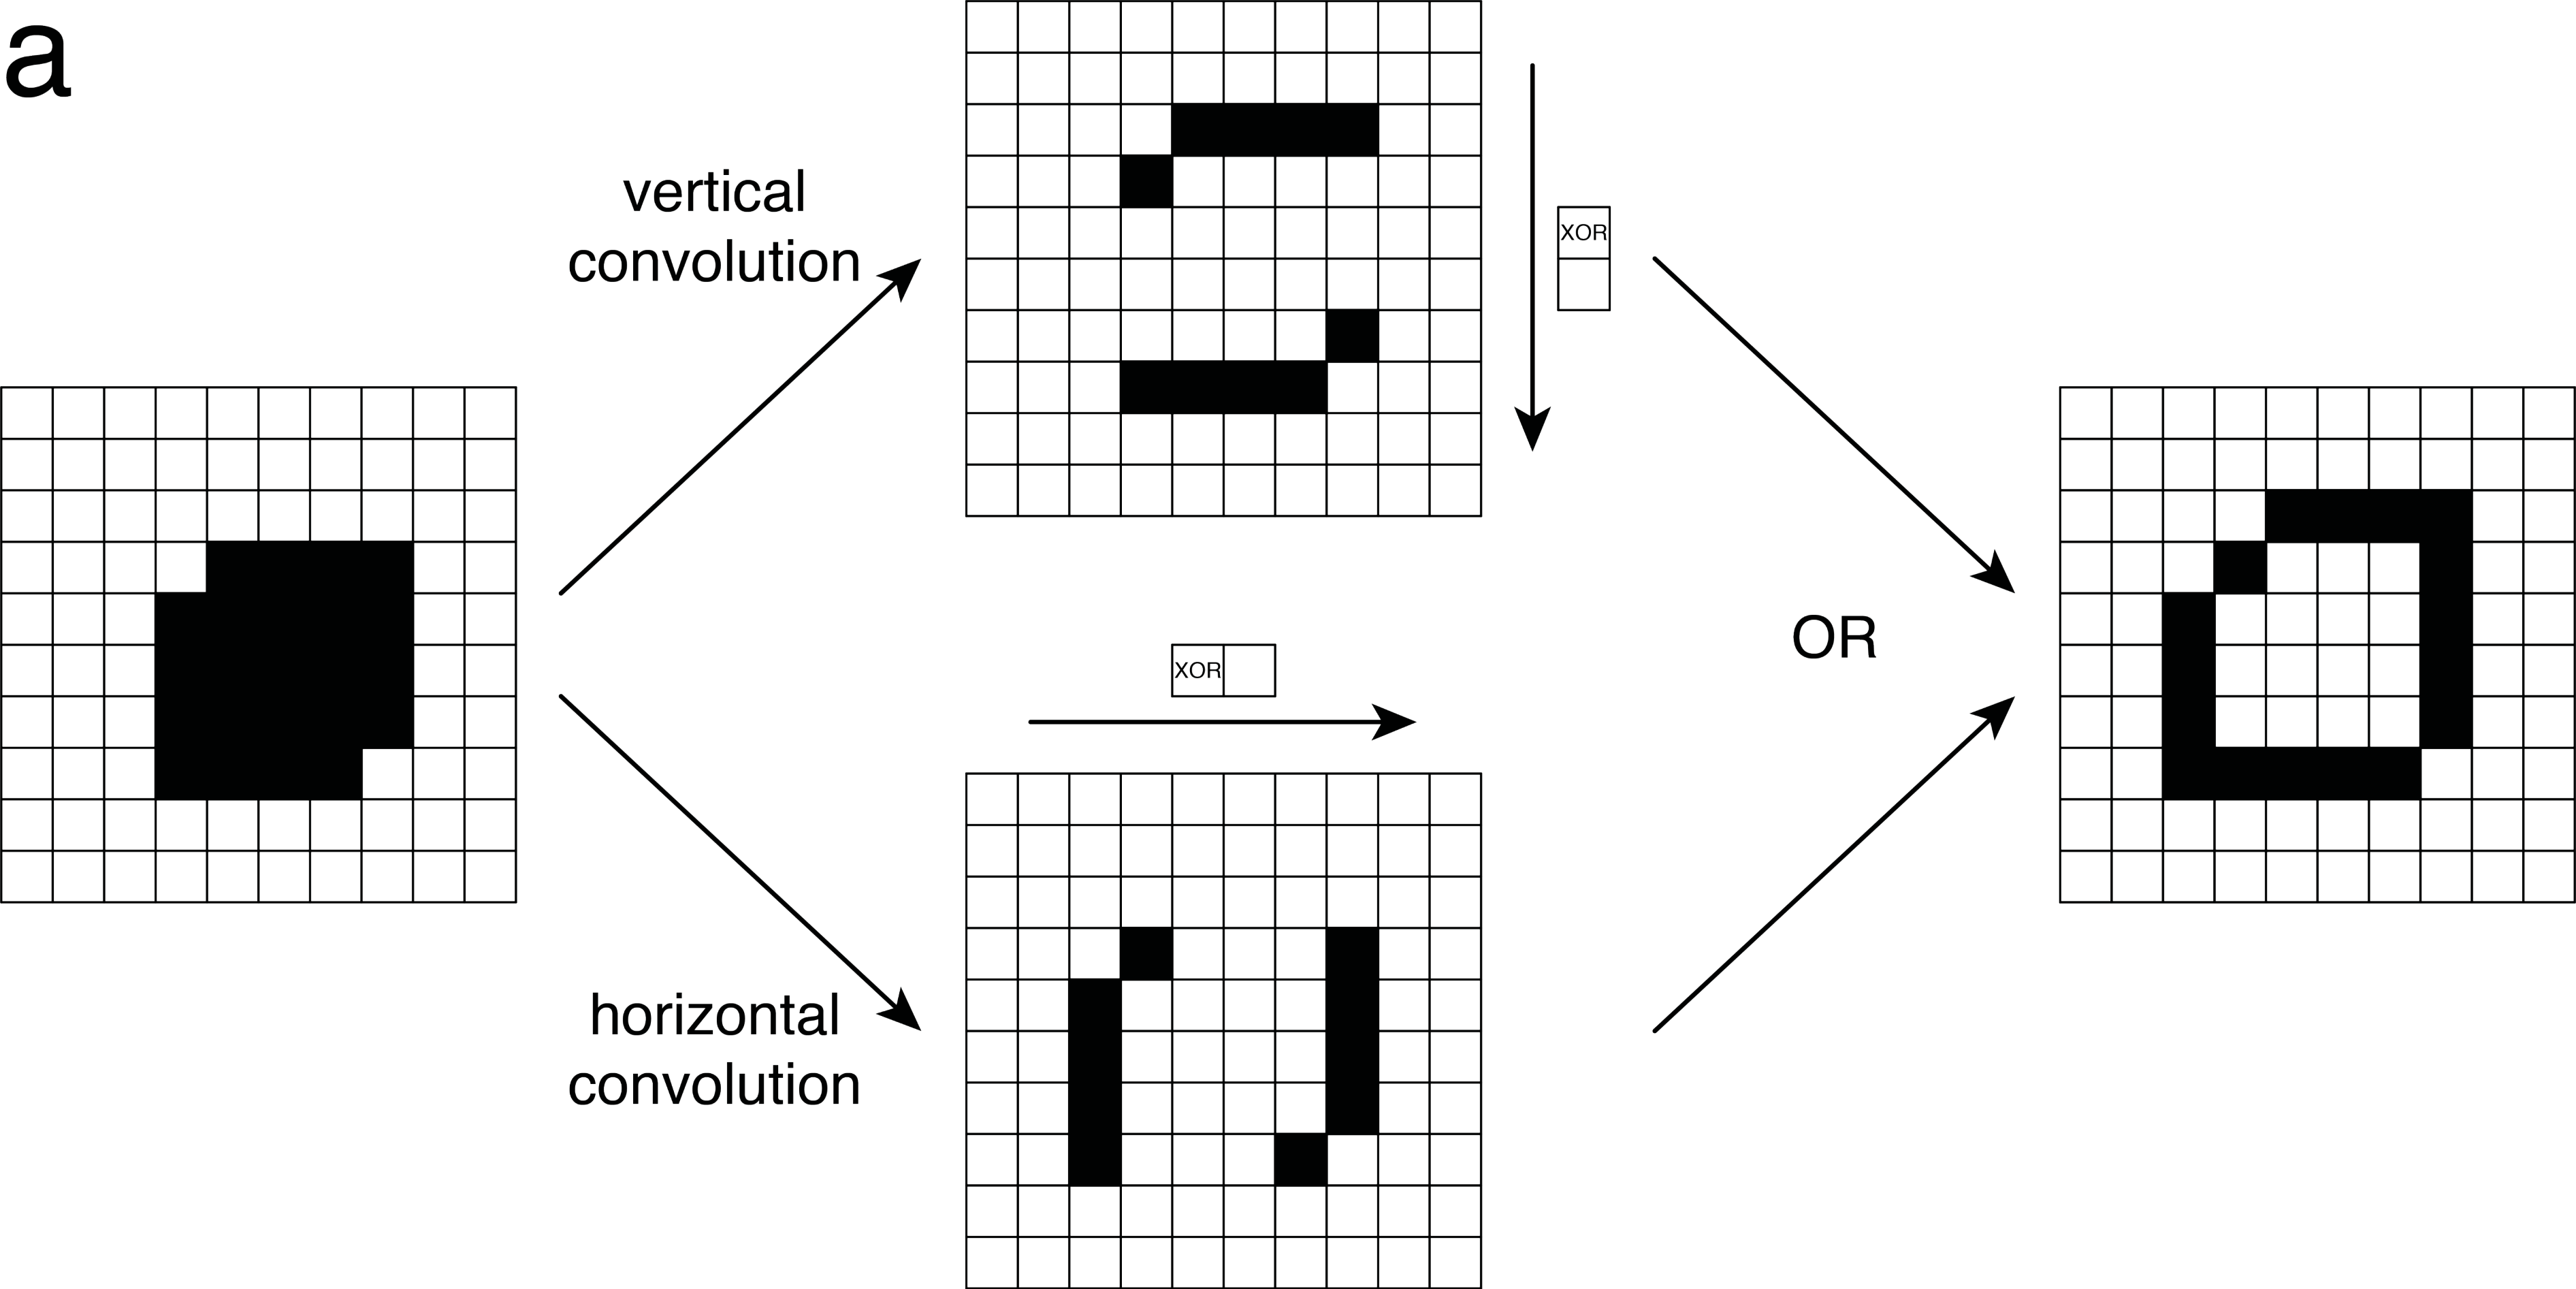

b

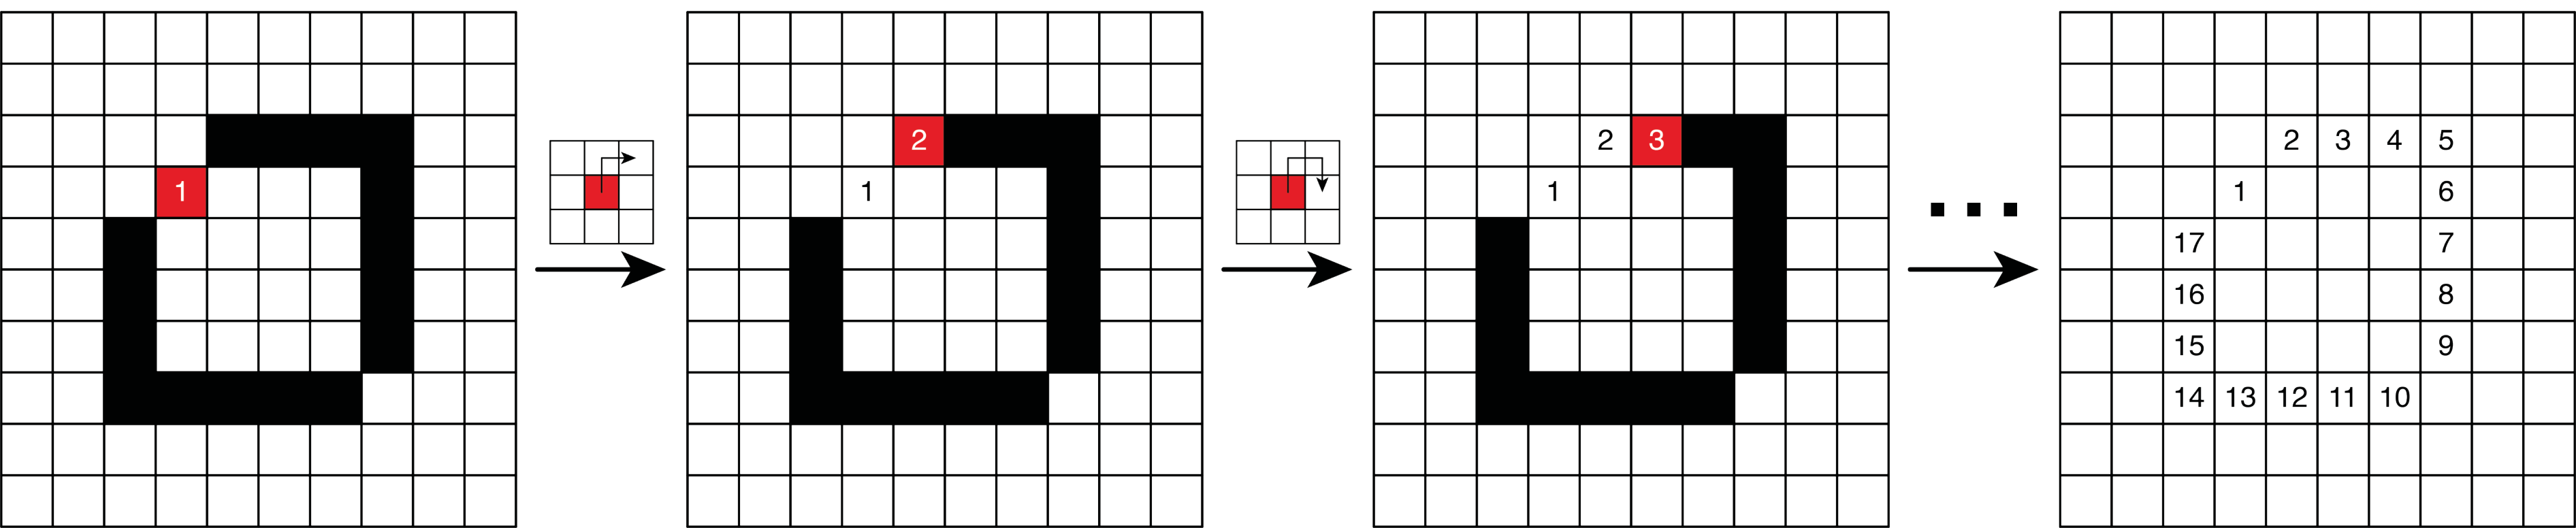

Supplement: supp [file elife-70015-supp-v1.zip]

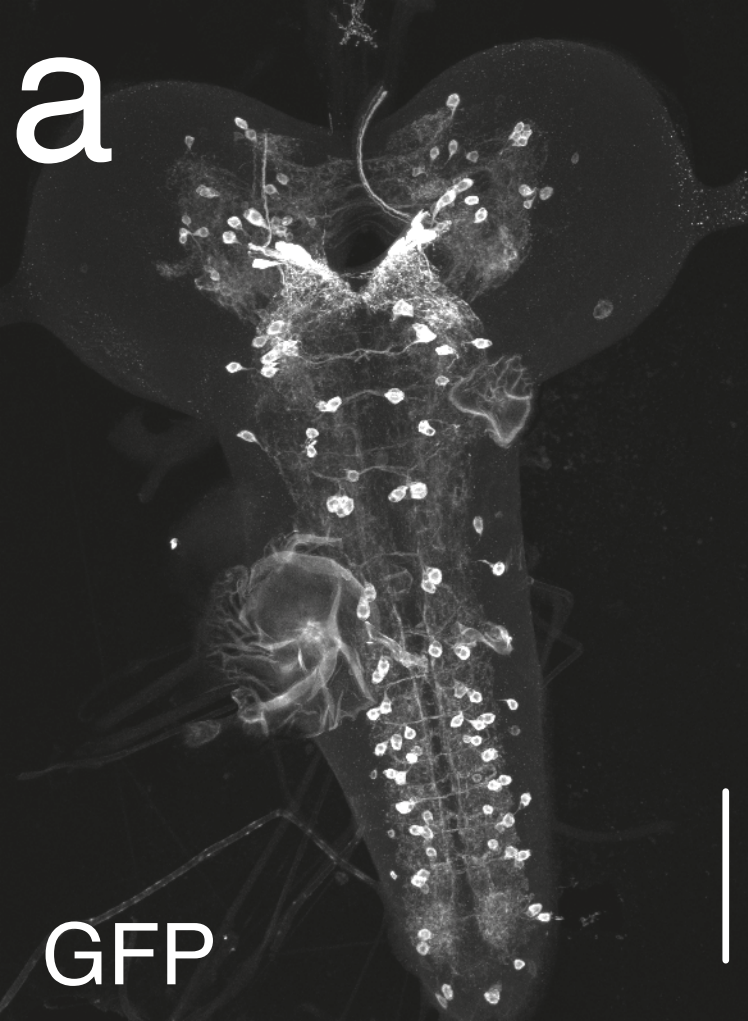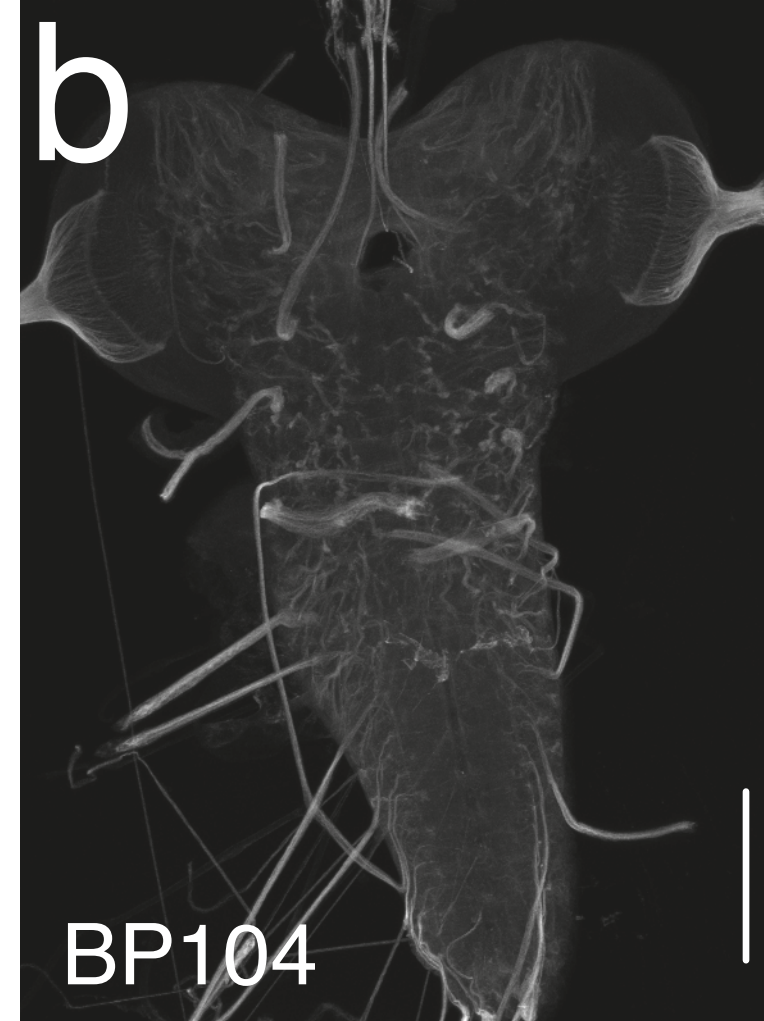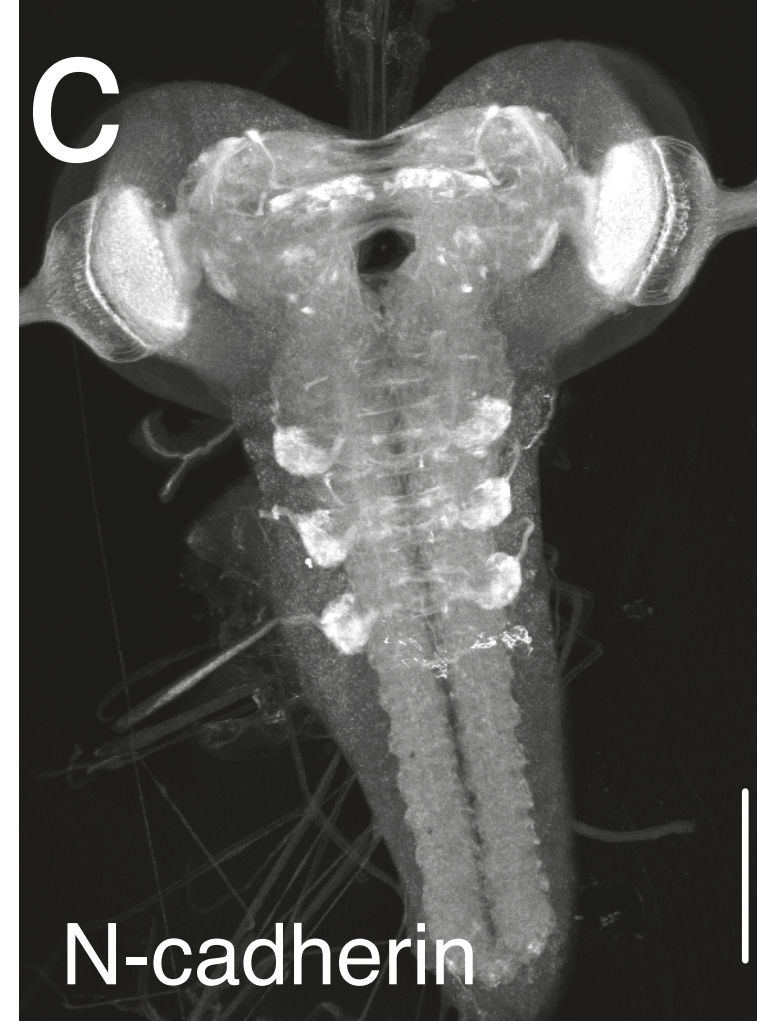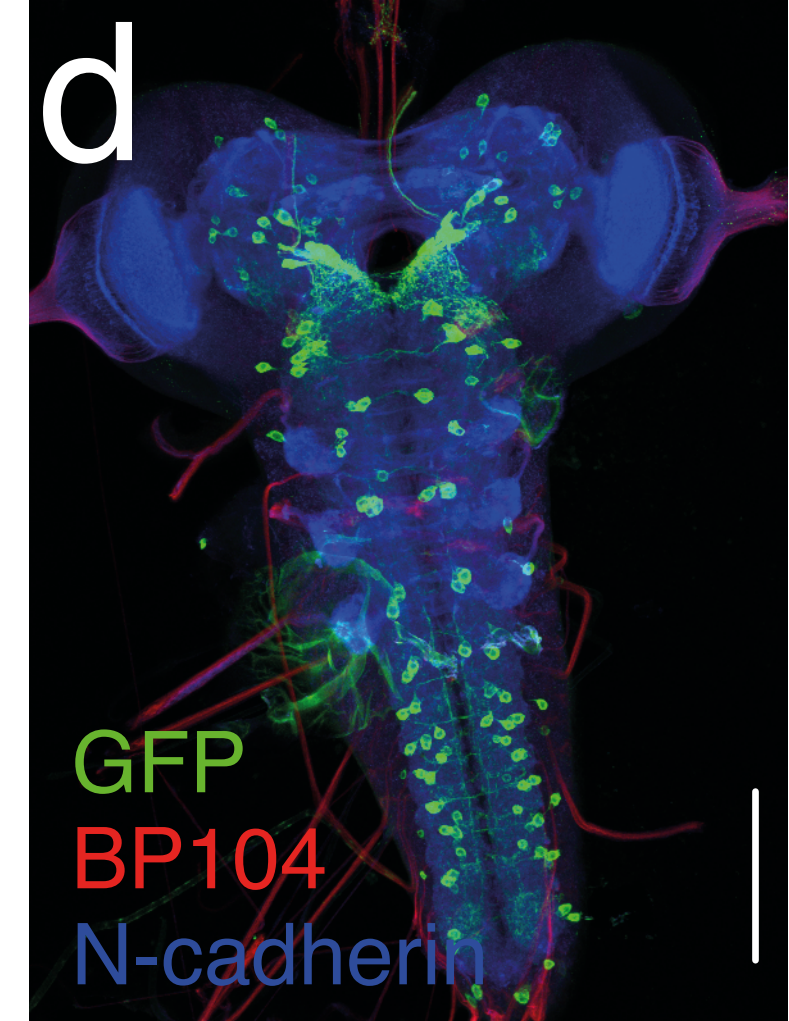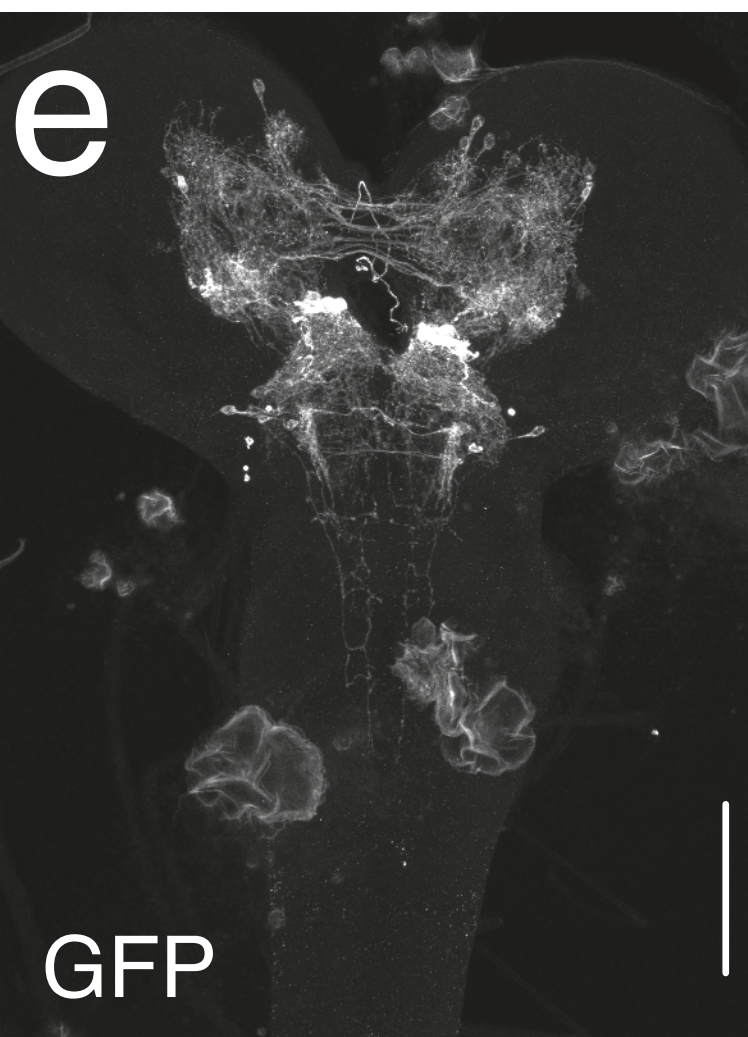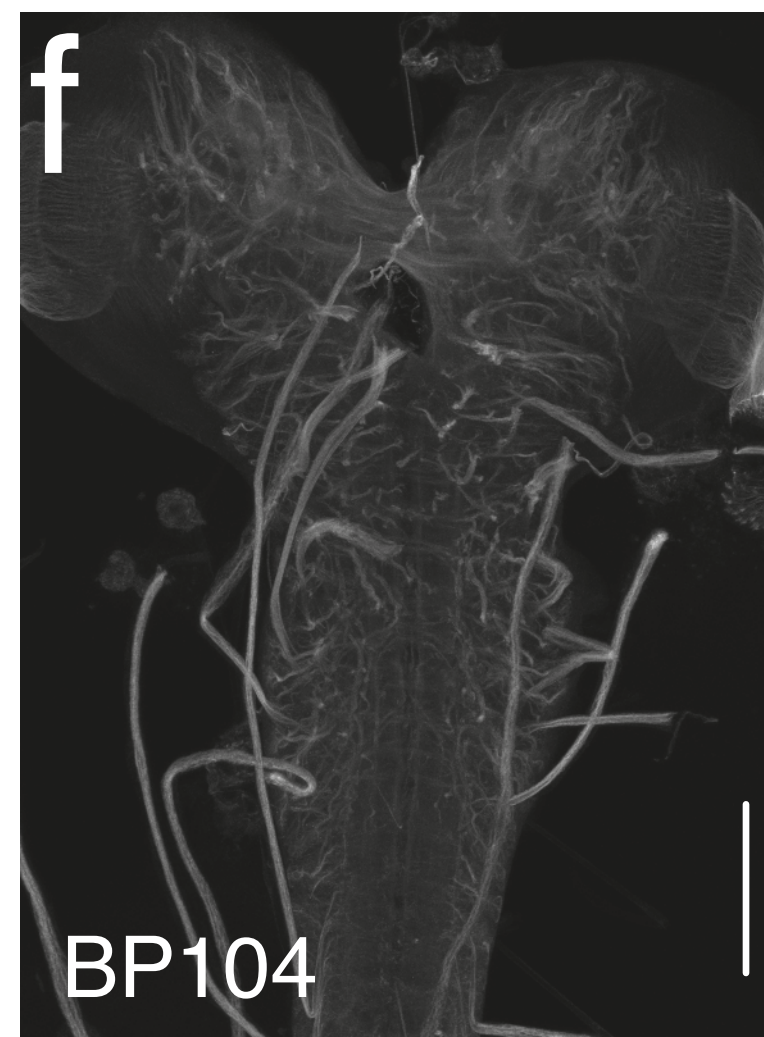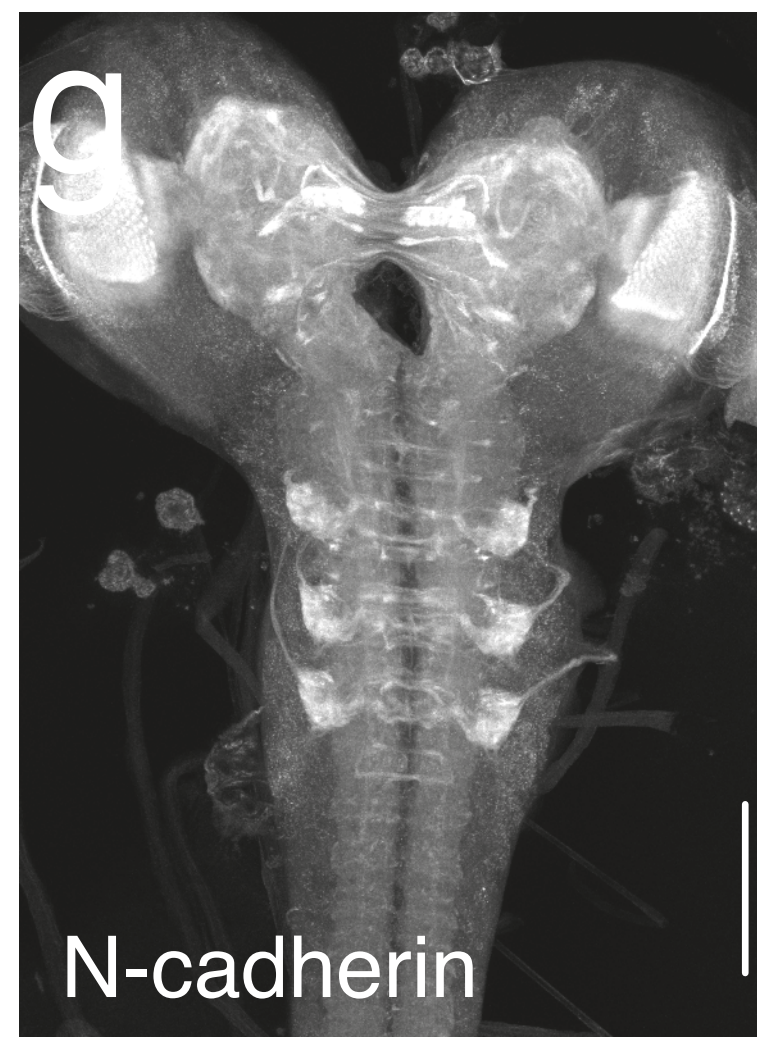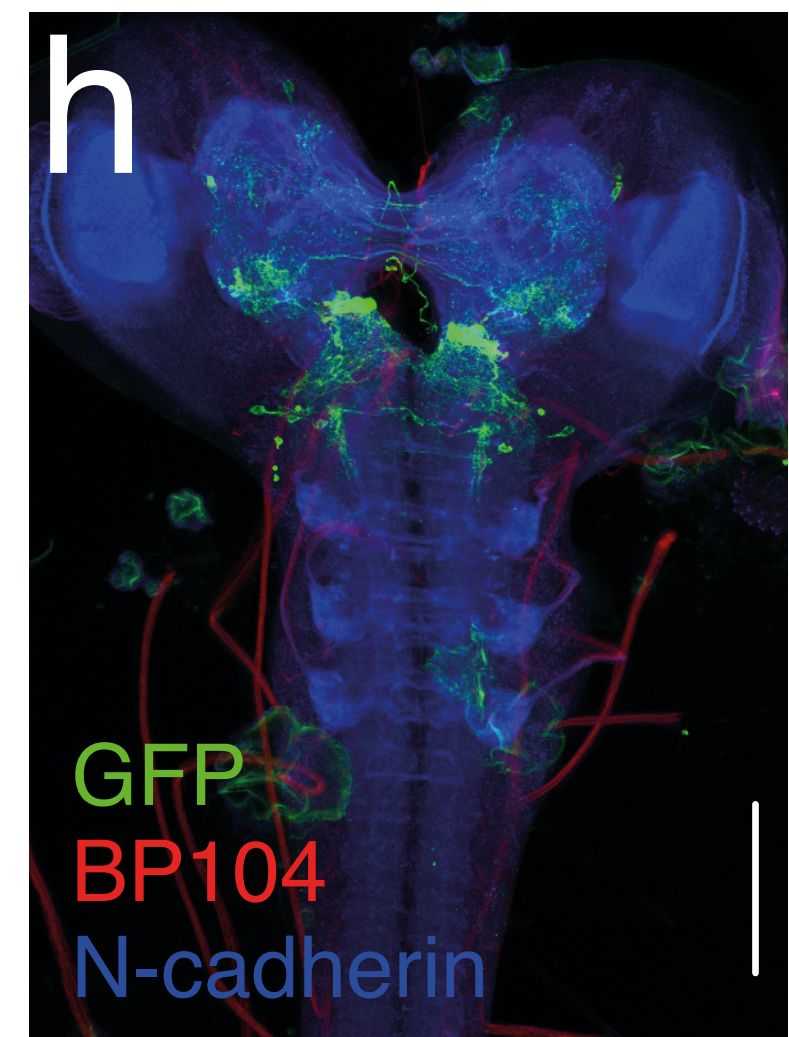

Supplement: supp [file elife-70015-supp-v1.zip]

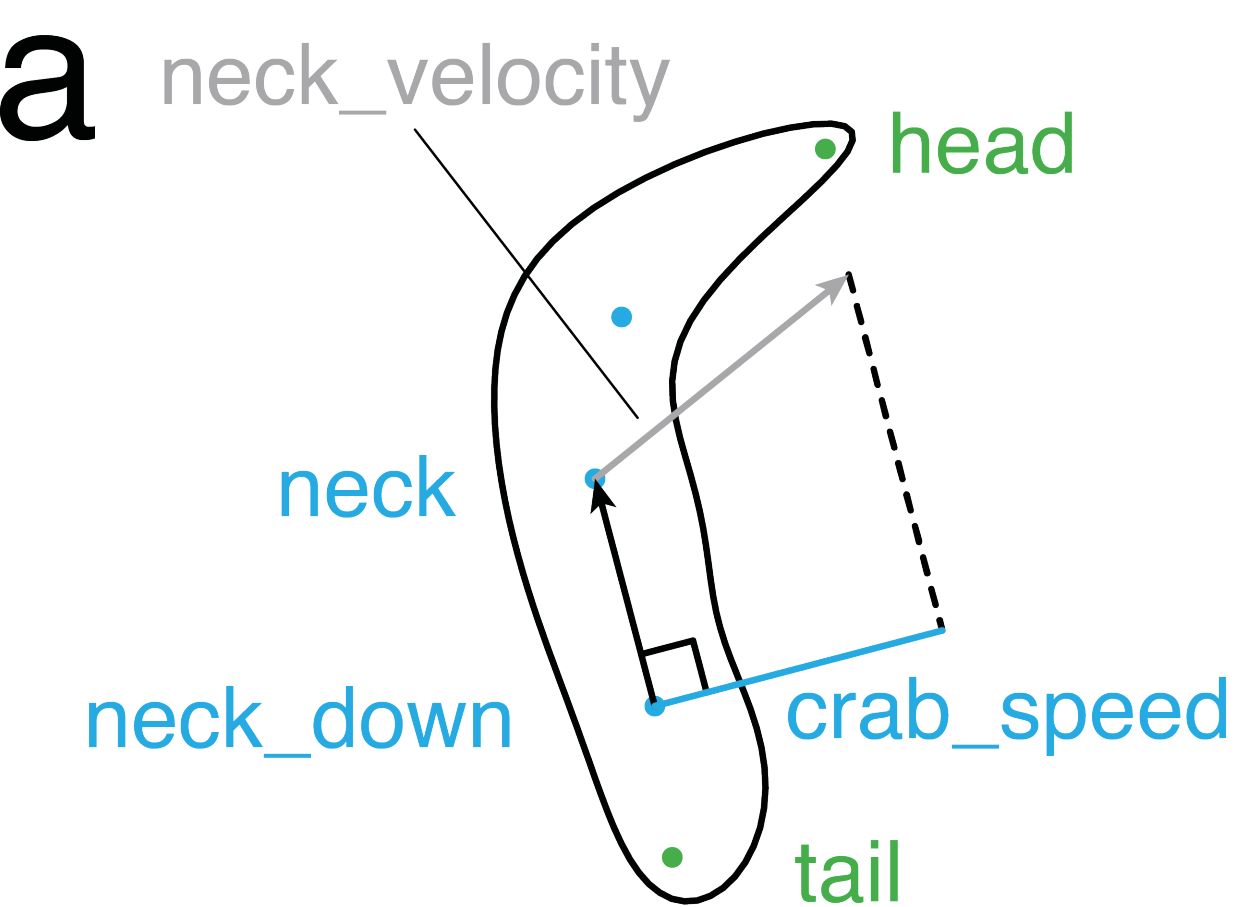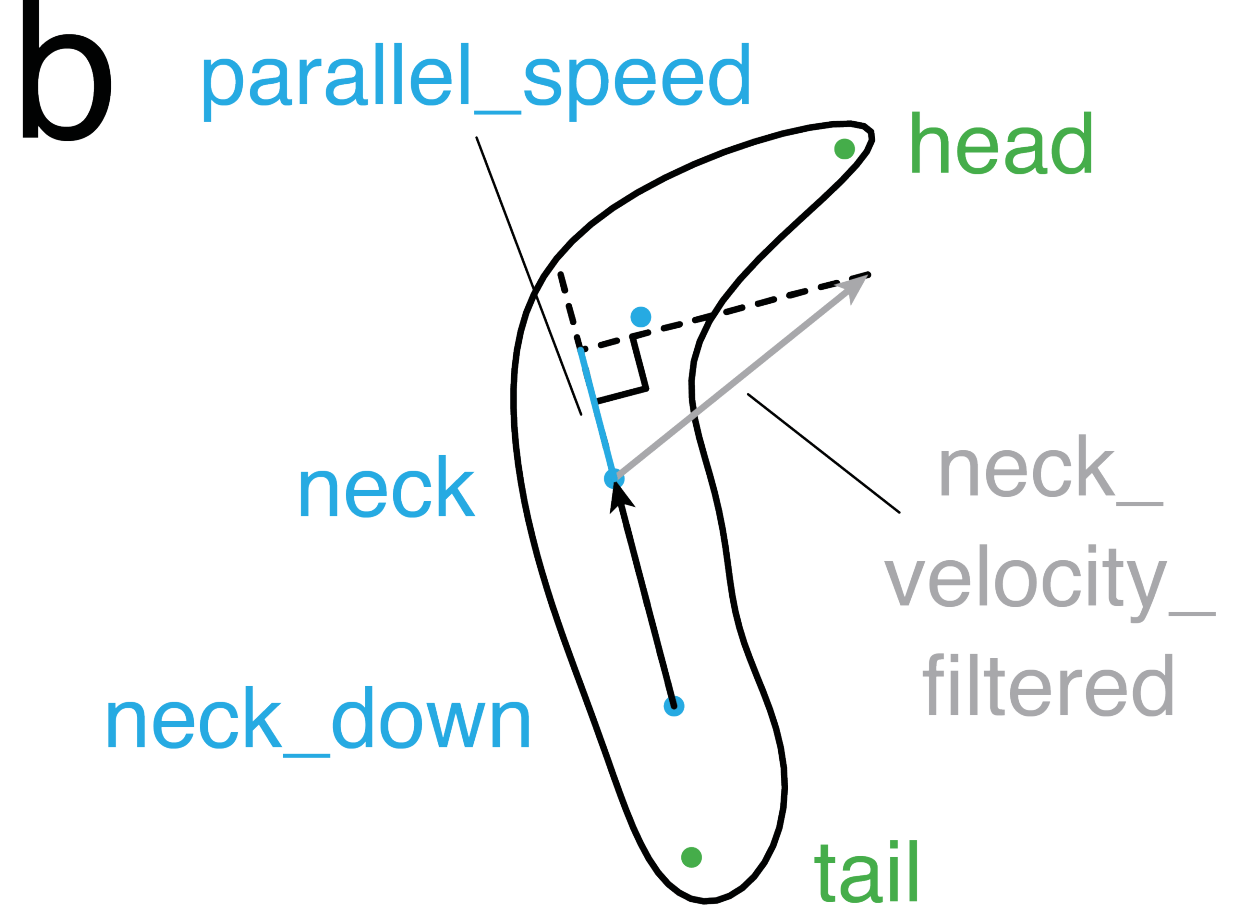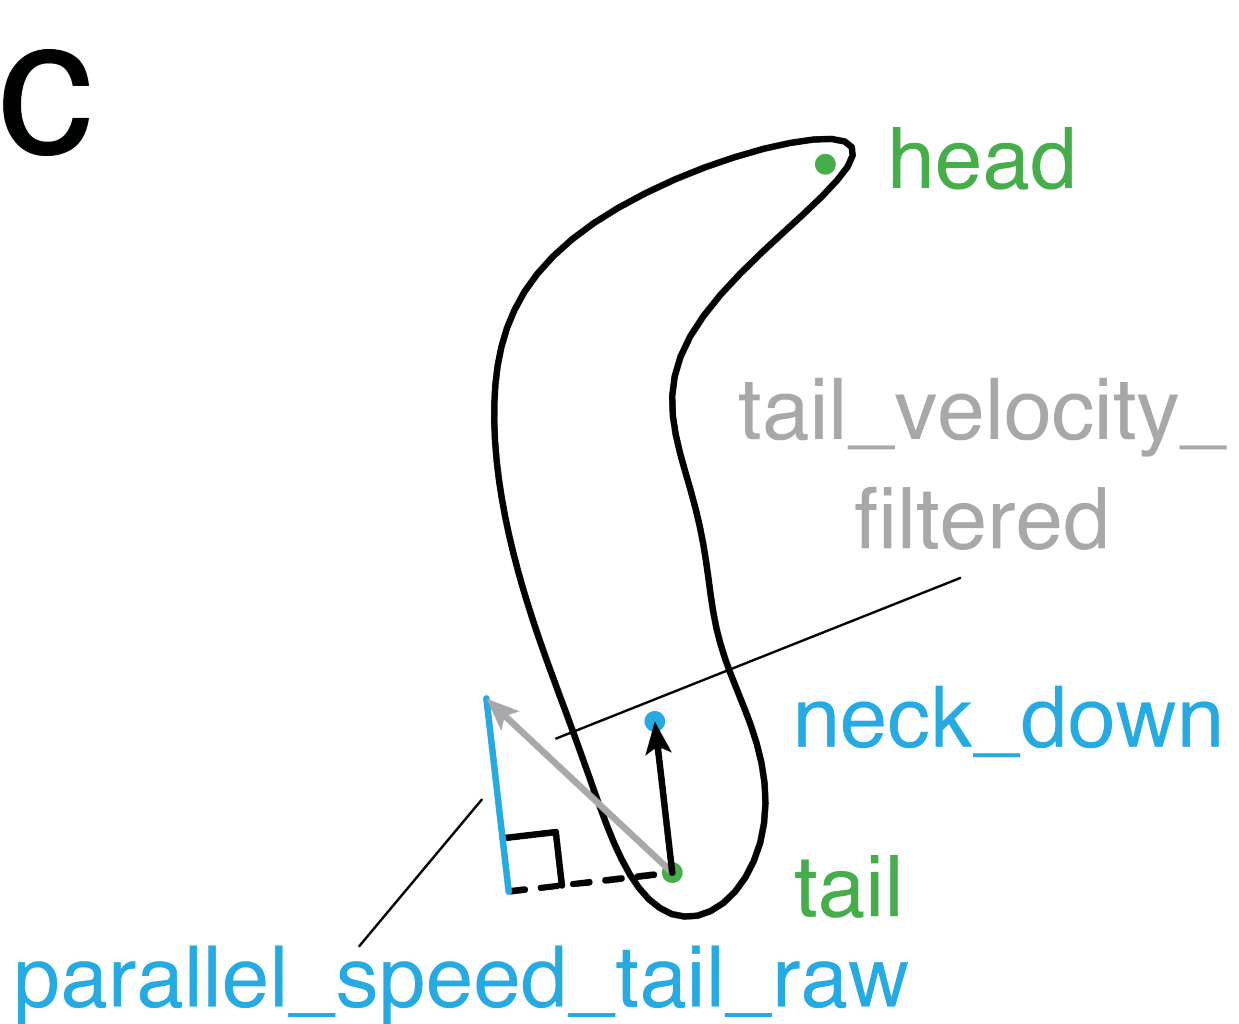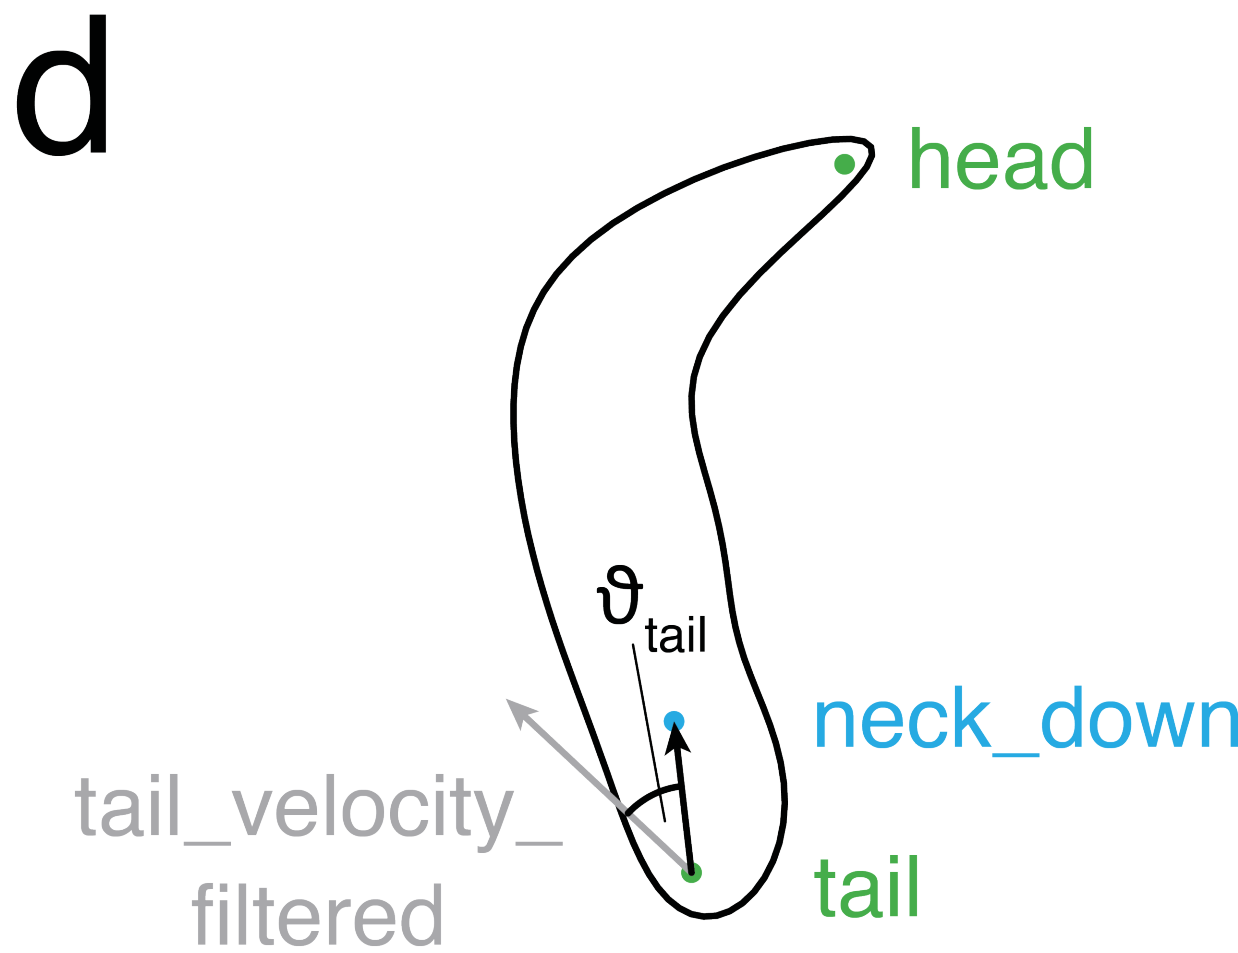

Supplement: supp [file elife-70015-supp-v1.zip]
